# Supplementary material for: Atropisomerism about aryl–C(sp3) bonds: chemically driven rotational pathway in cannabidiol derivatives
Source: Royal Society of Chemistry journal article supplement (doi:10.1039/d3ob01617j), 2023-01-01
Supplement: d3ob01617j1.pdf [file d3ob01617j1.pdf]

Electronic Supporting Information

Atropisomerism about aryl-C(sp<sup>3</sup>) bonds: chemically driven  
rotational pathway in cannabidiol derivatives

*Clément Denhez,<sup>a</sup> Pedro Lameiras<sup>a</sup> and Hatice Berber<sup>\*a</sup>*

<sup>a</sup>Université de Reims Champagne Ardenne, CNRS, ICMR UMR 7312, 51097 Reims, France.

hatice.berber@univ-reims.fr

## Table of Contents

|                                                                                          |          |
|------------------------------------------------------------------------------------------|----------|
| <sup>1</sup> H and <sup>13</sup> C NMR Spectra of Naphthylcyclohexanes <b>2a-c</b>       | S4-S25   |
| <sup>1</sup> H and <sup>13</sup> C NMR Spectra of Naphthylcyclohexene oxides <b>3b,c</b> | S26-S41  |
| Table S1,S2                                                                              | S42      |
| VT- NMR Experiments and Determination of Kinetic Parameters                              | S43-S51  |
| VT-2D EXSY Spectra of <b>2a-c</b> and <b>3b,c</b>                                        | S52-S56  |
| X-Ray Crystal Structure data of ( <i>P</i> )- <b>2c</b>                                  | S57-S58  |
| Quantum chemical calculations                                                            | S59-S188 |

*<sup>1</sup>H and <sup>13</sup>C NMR Spectra of Naphthylcyclohexanes 2a-c and Naphthylcyclohexene oxides 3b,c:*

300 MHz  $^1\text{H}$  spectrum of **2a** in  $\text{CDCl}_3$  at 298 K

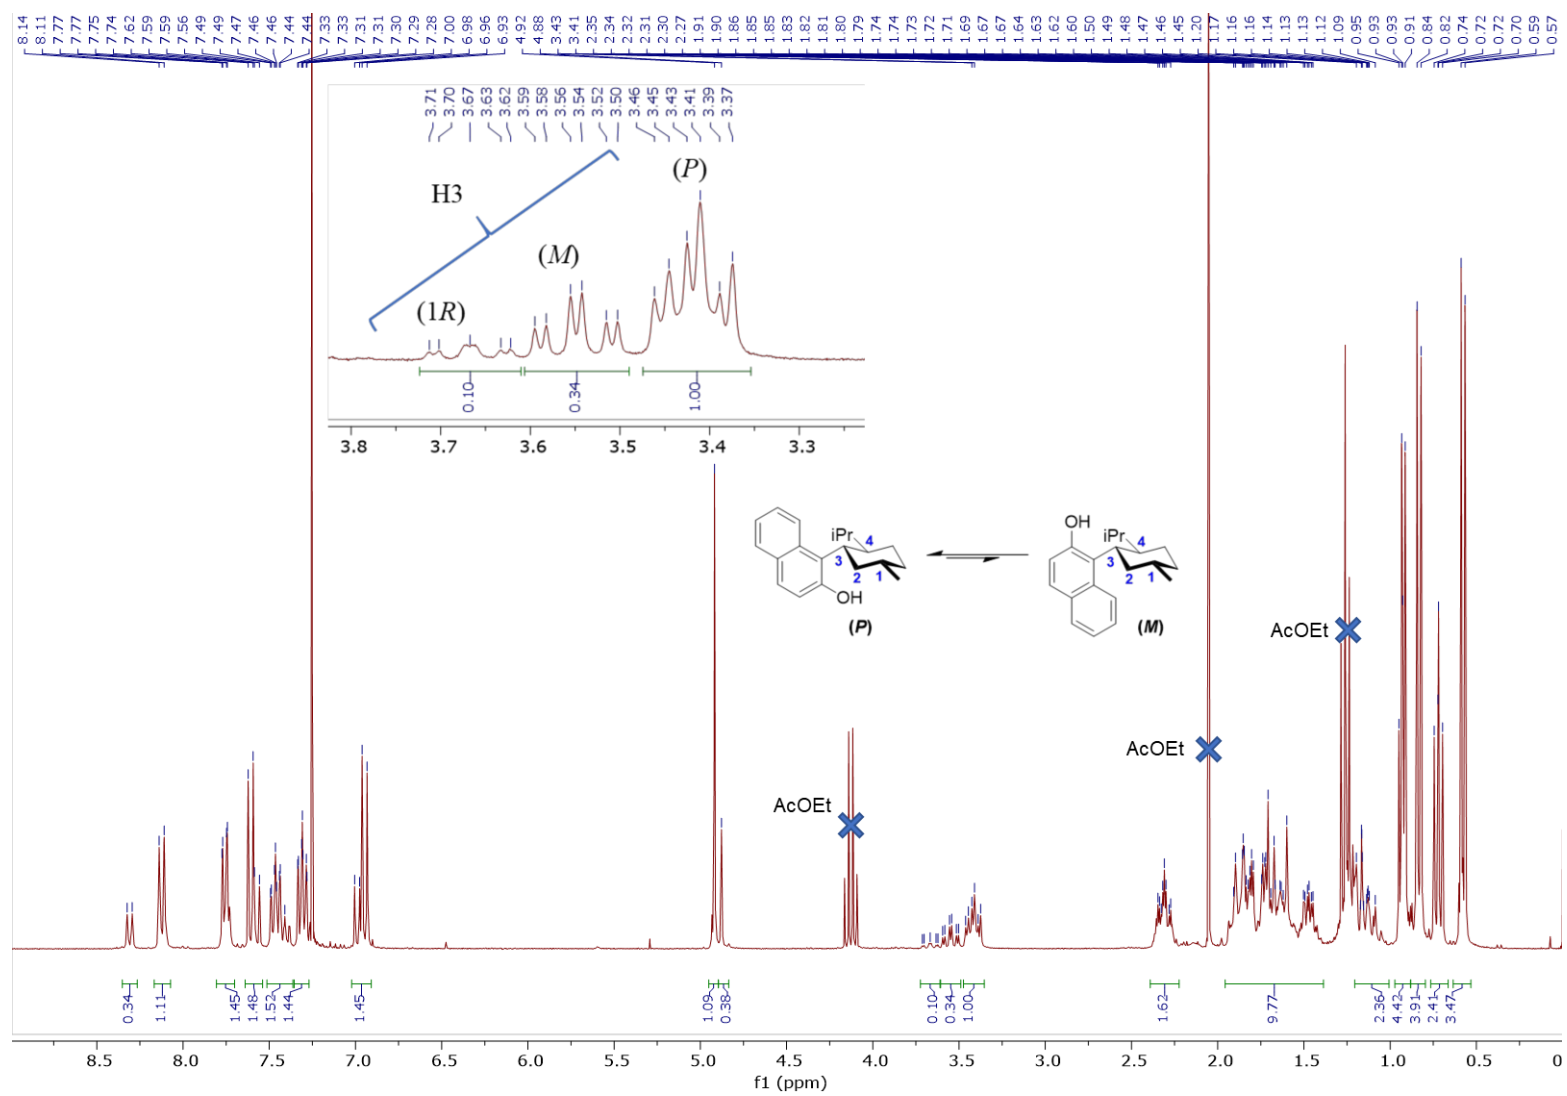



75 MHz  $^{13}\text{C}$  spectrum of **2a** in  $\text{CDCl}_3$  at 298 K

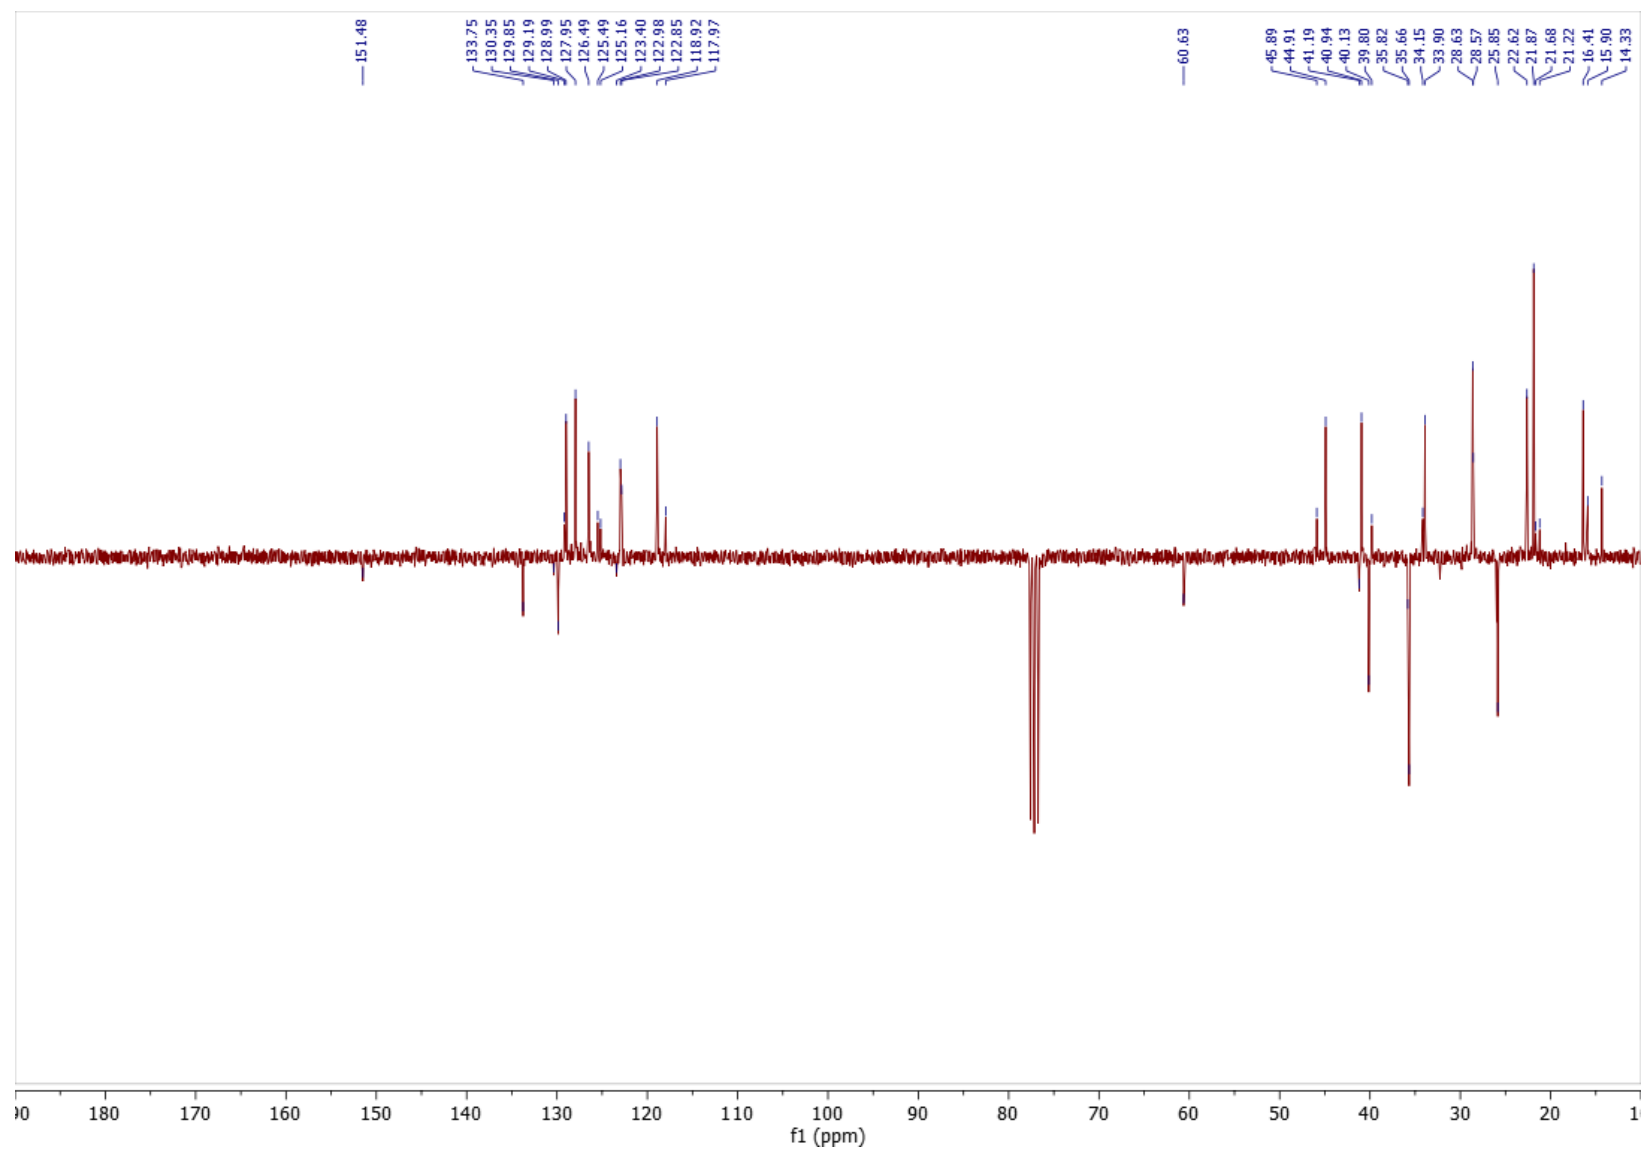

500 MHz  $^1\text{H}$  spectrum of **2a** in  $\text{DMSO-}d_6$  at 298 K

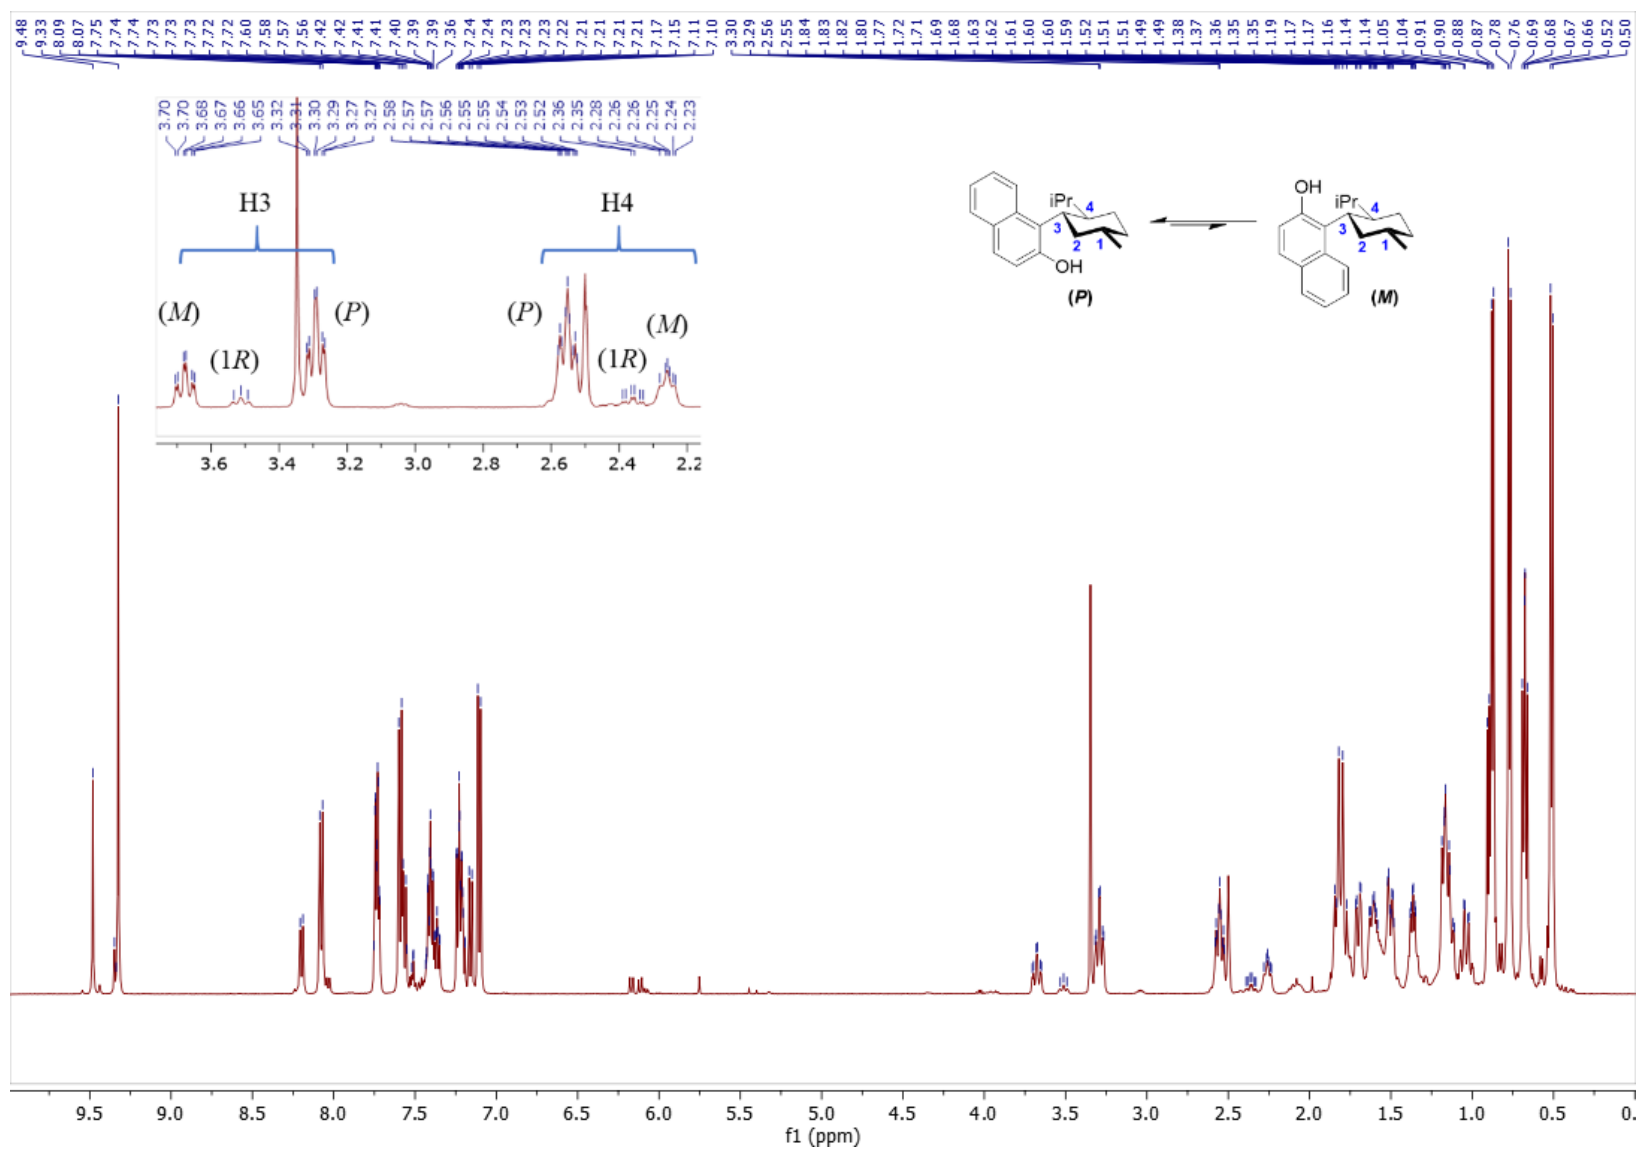

150 MHz  $^{13}\text{C}$  spectrum of **2a** in DMSO-*d*<sub>6</sub> at 298 K

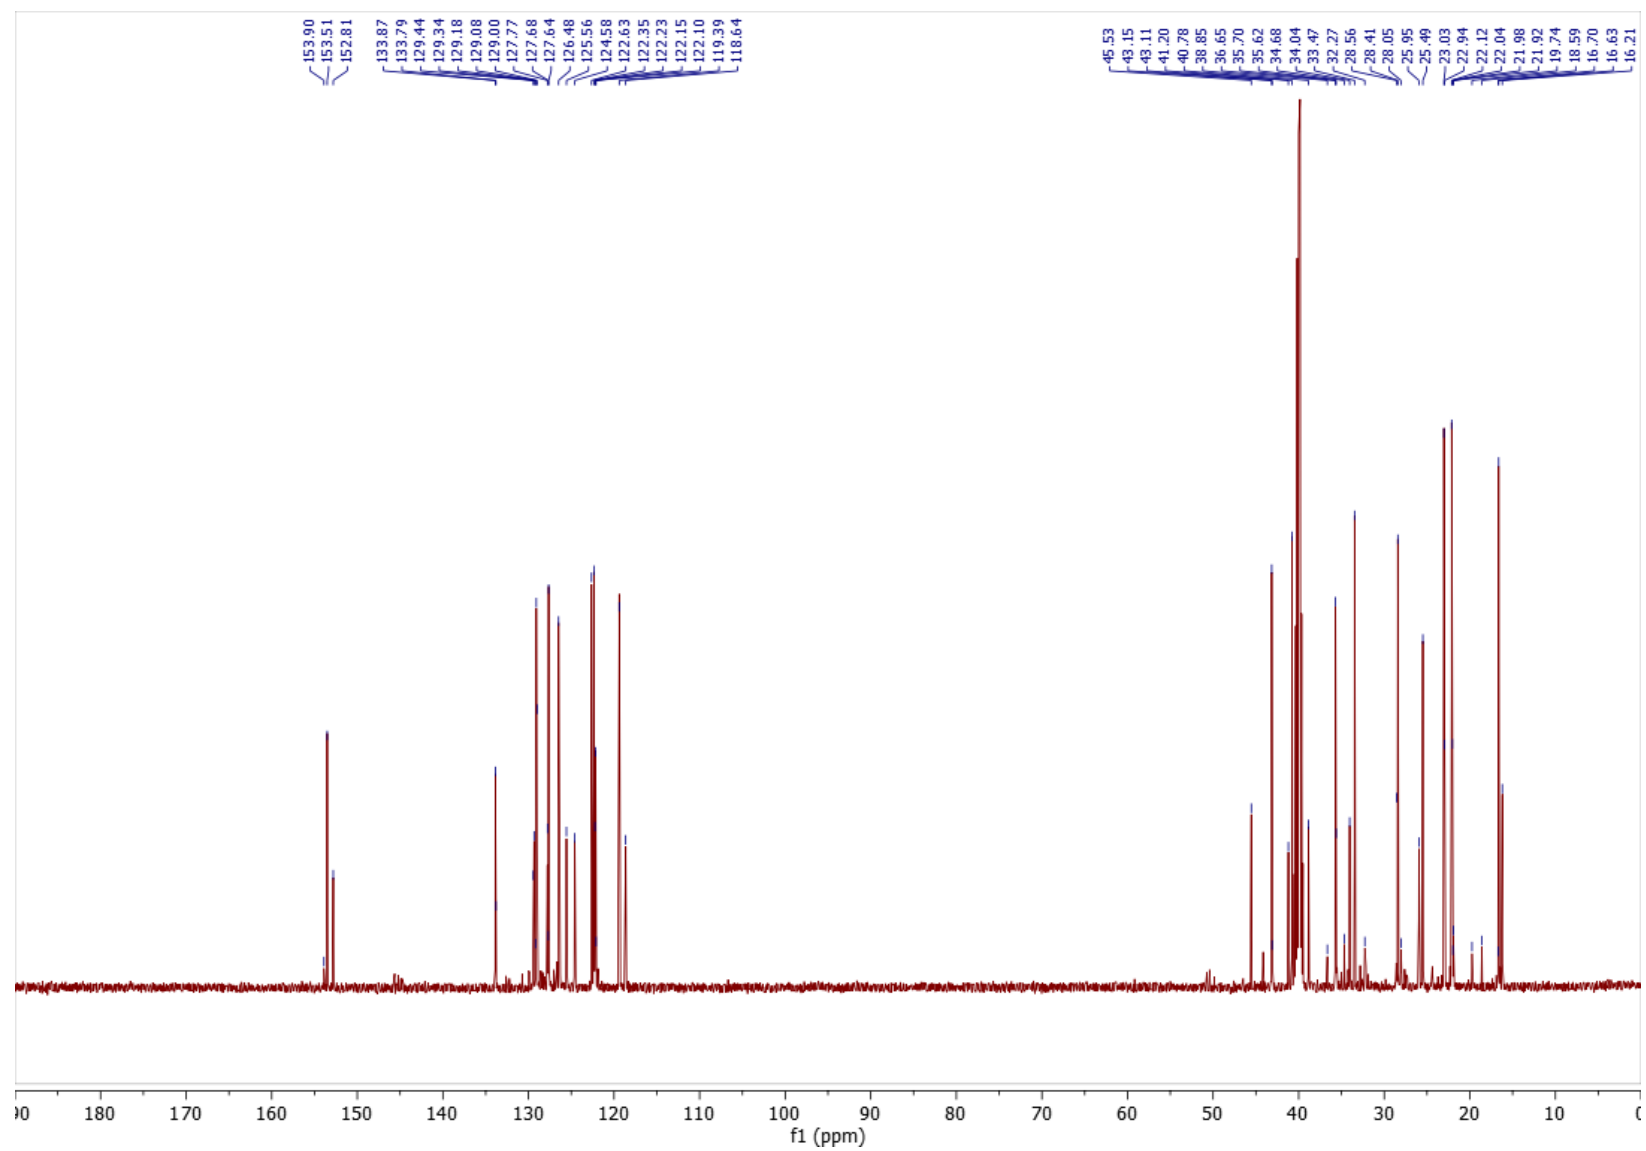

COSY spectrum of **2a** in DMSO-*d*<sub>6</sub> at 298 K

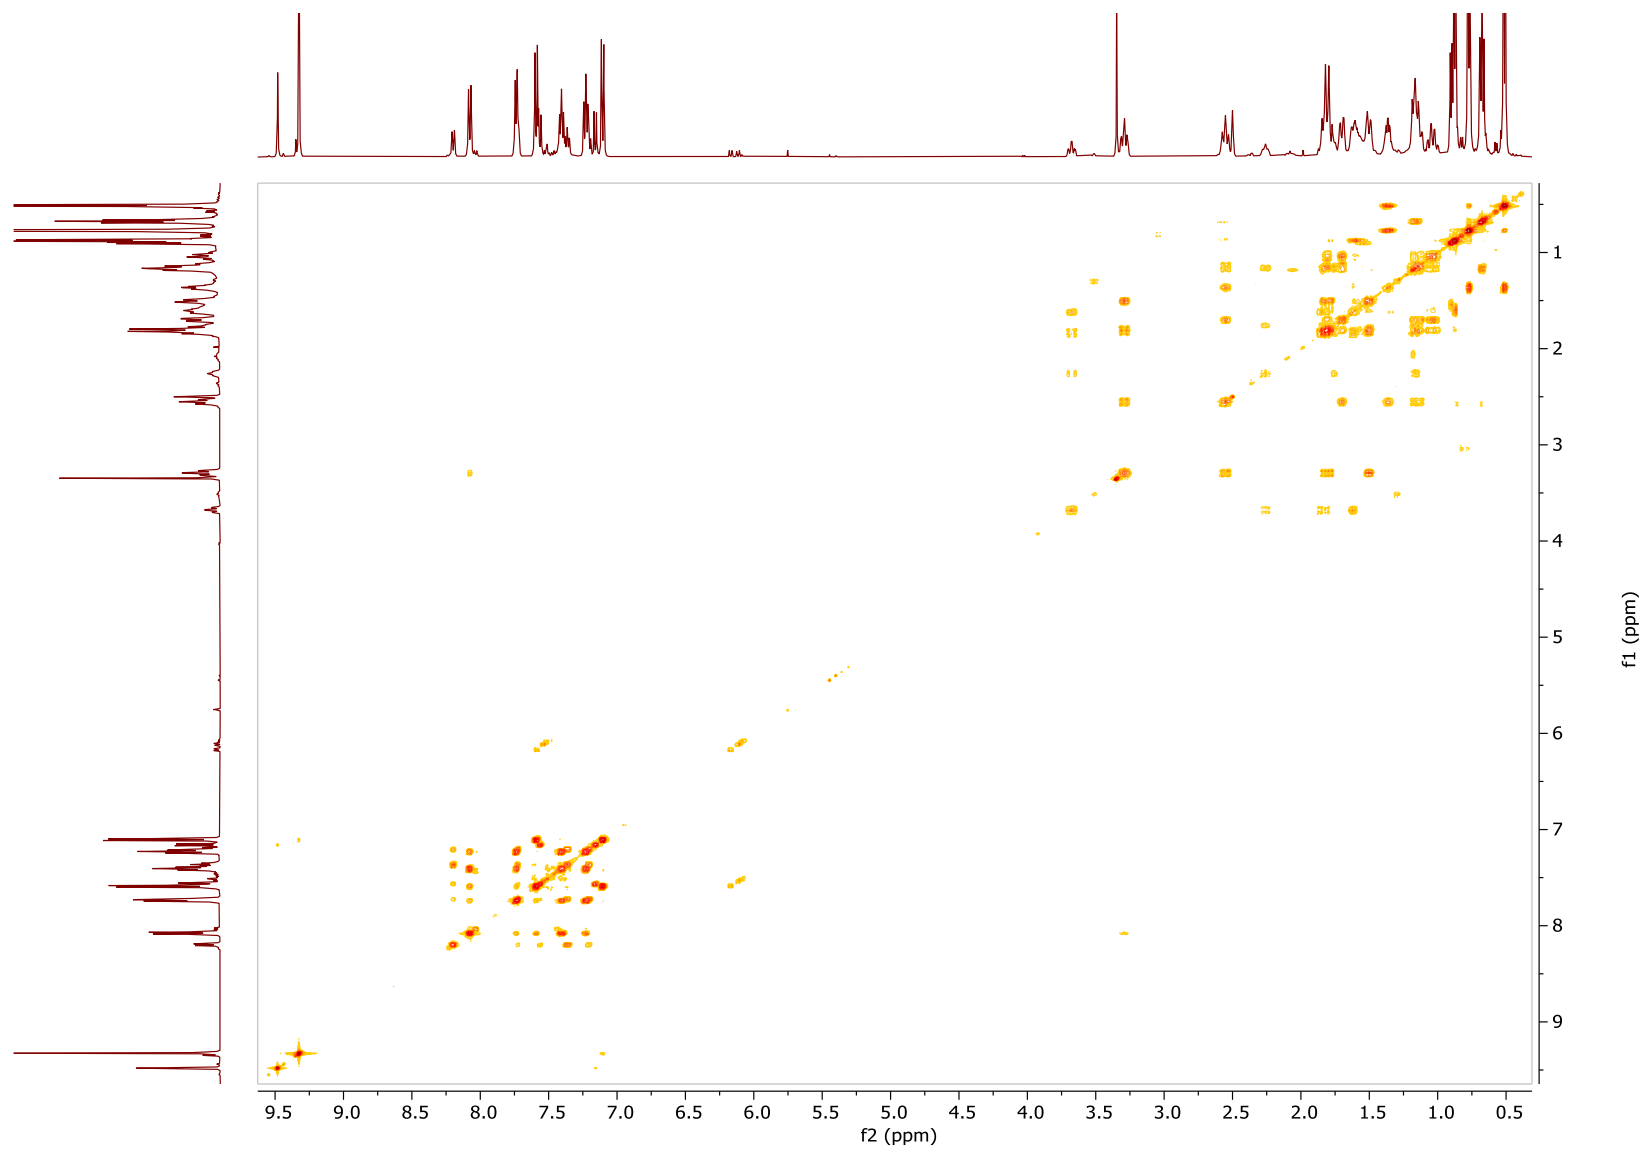

NOESY spectrum of **2a** in DMSO-*d*<sub>6</sub> at 298 K

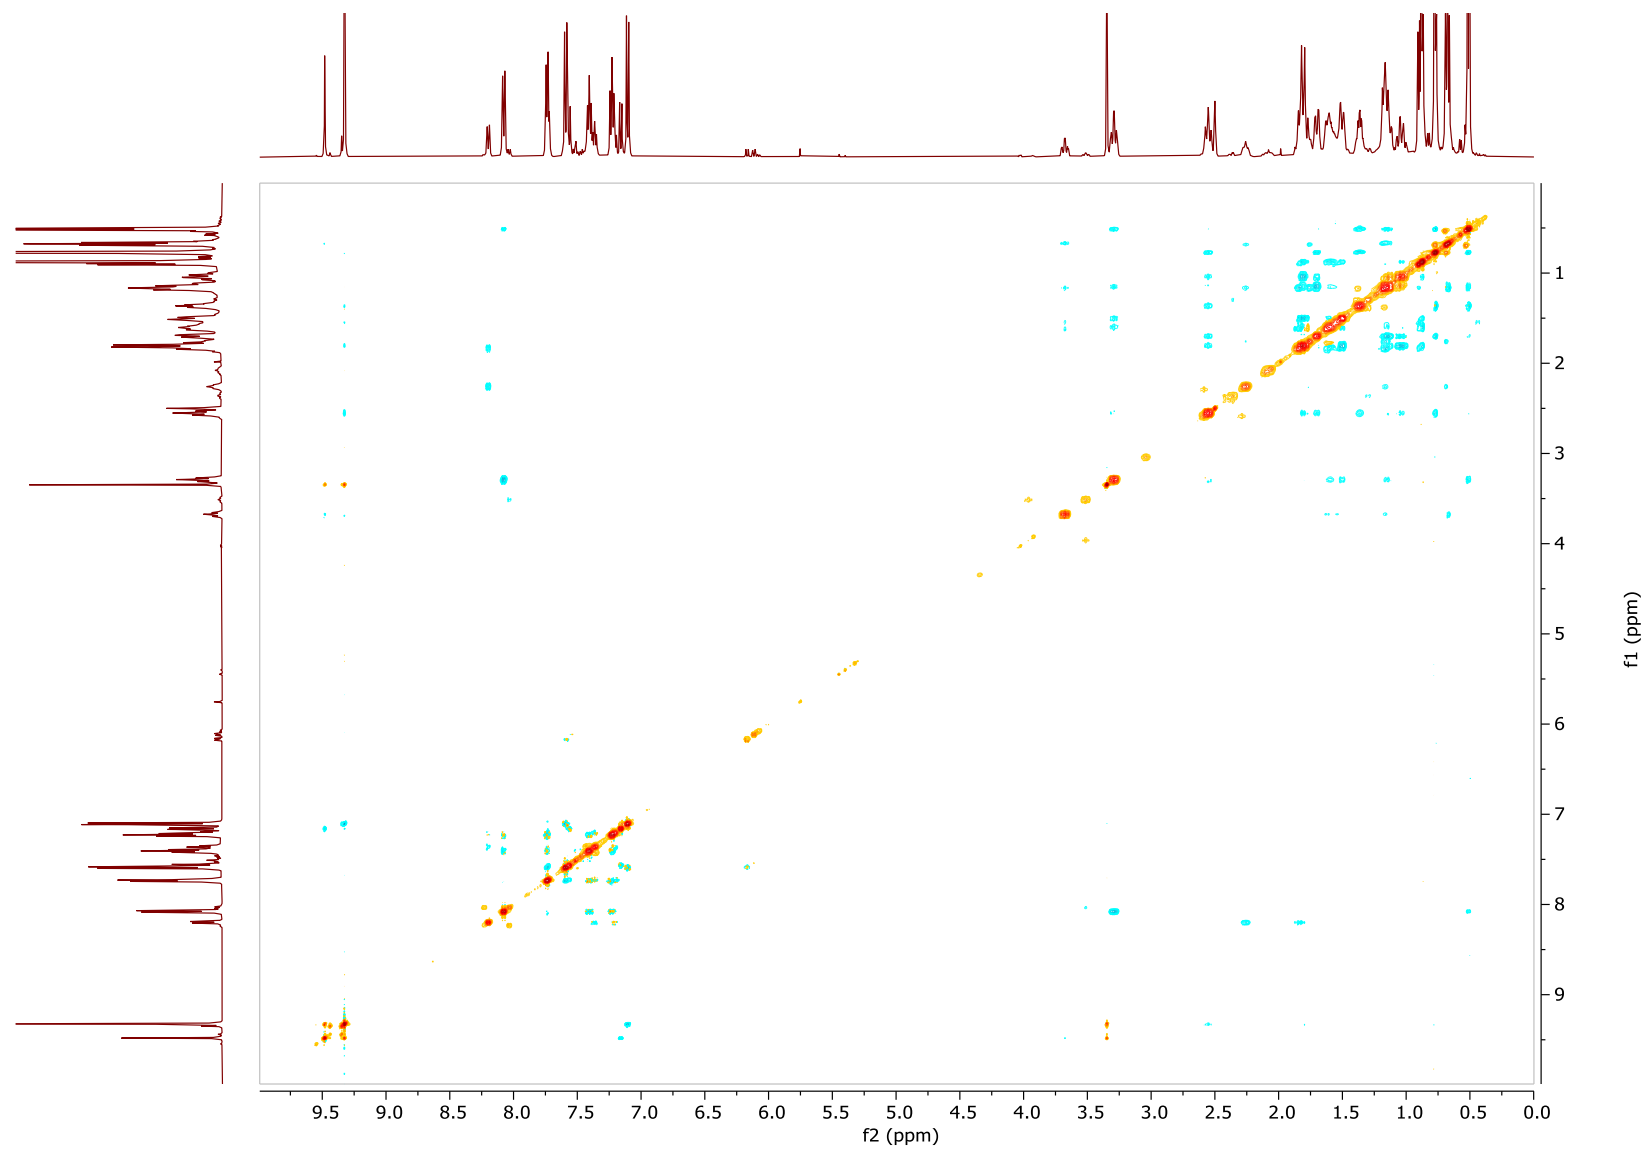

HSQC spectrum of **2a** in DMSO-*d*<sub>6</sub> at 298 K

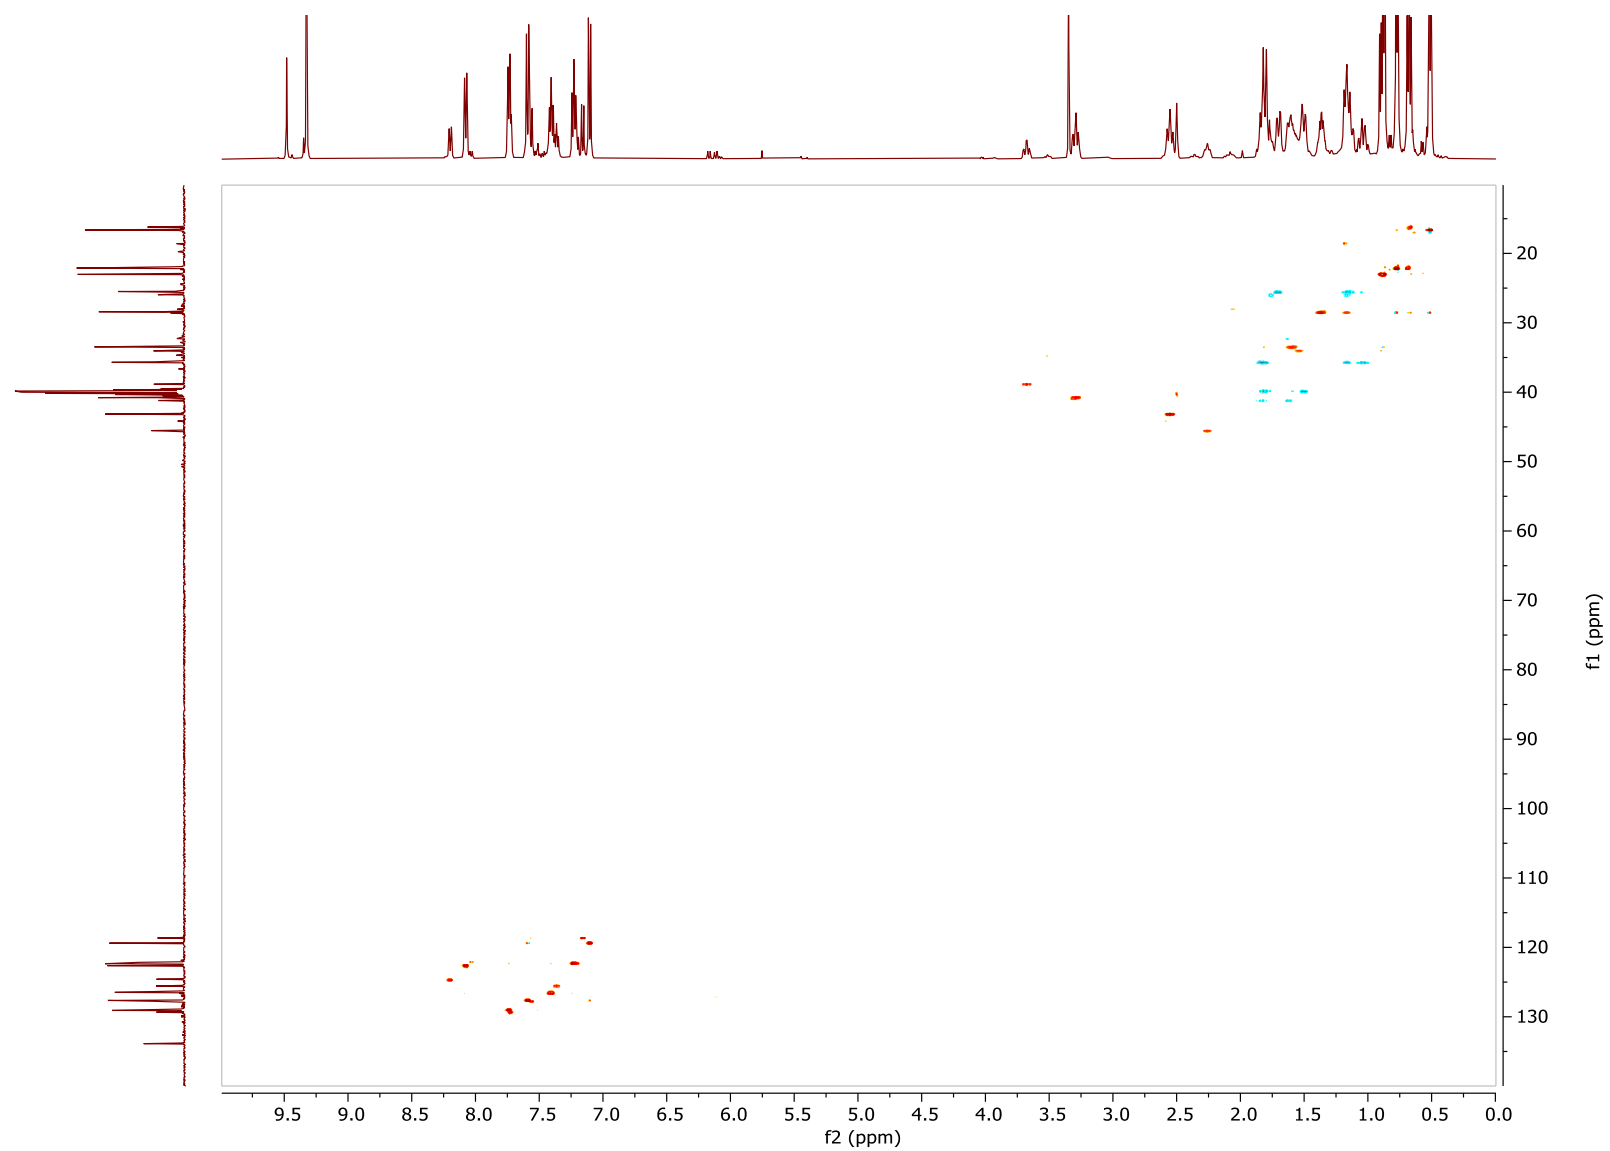

HMBC spectrum of **2a** in DMSO-*d*<sub>6</sub> at 298 K

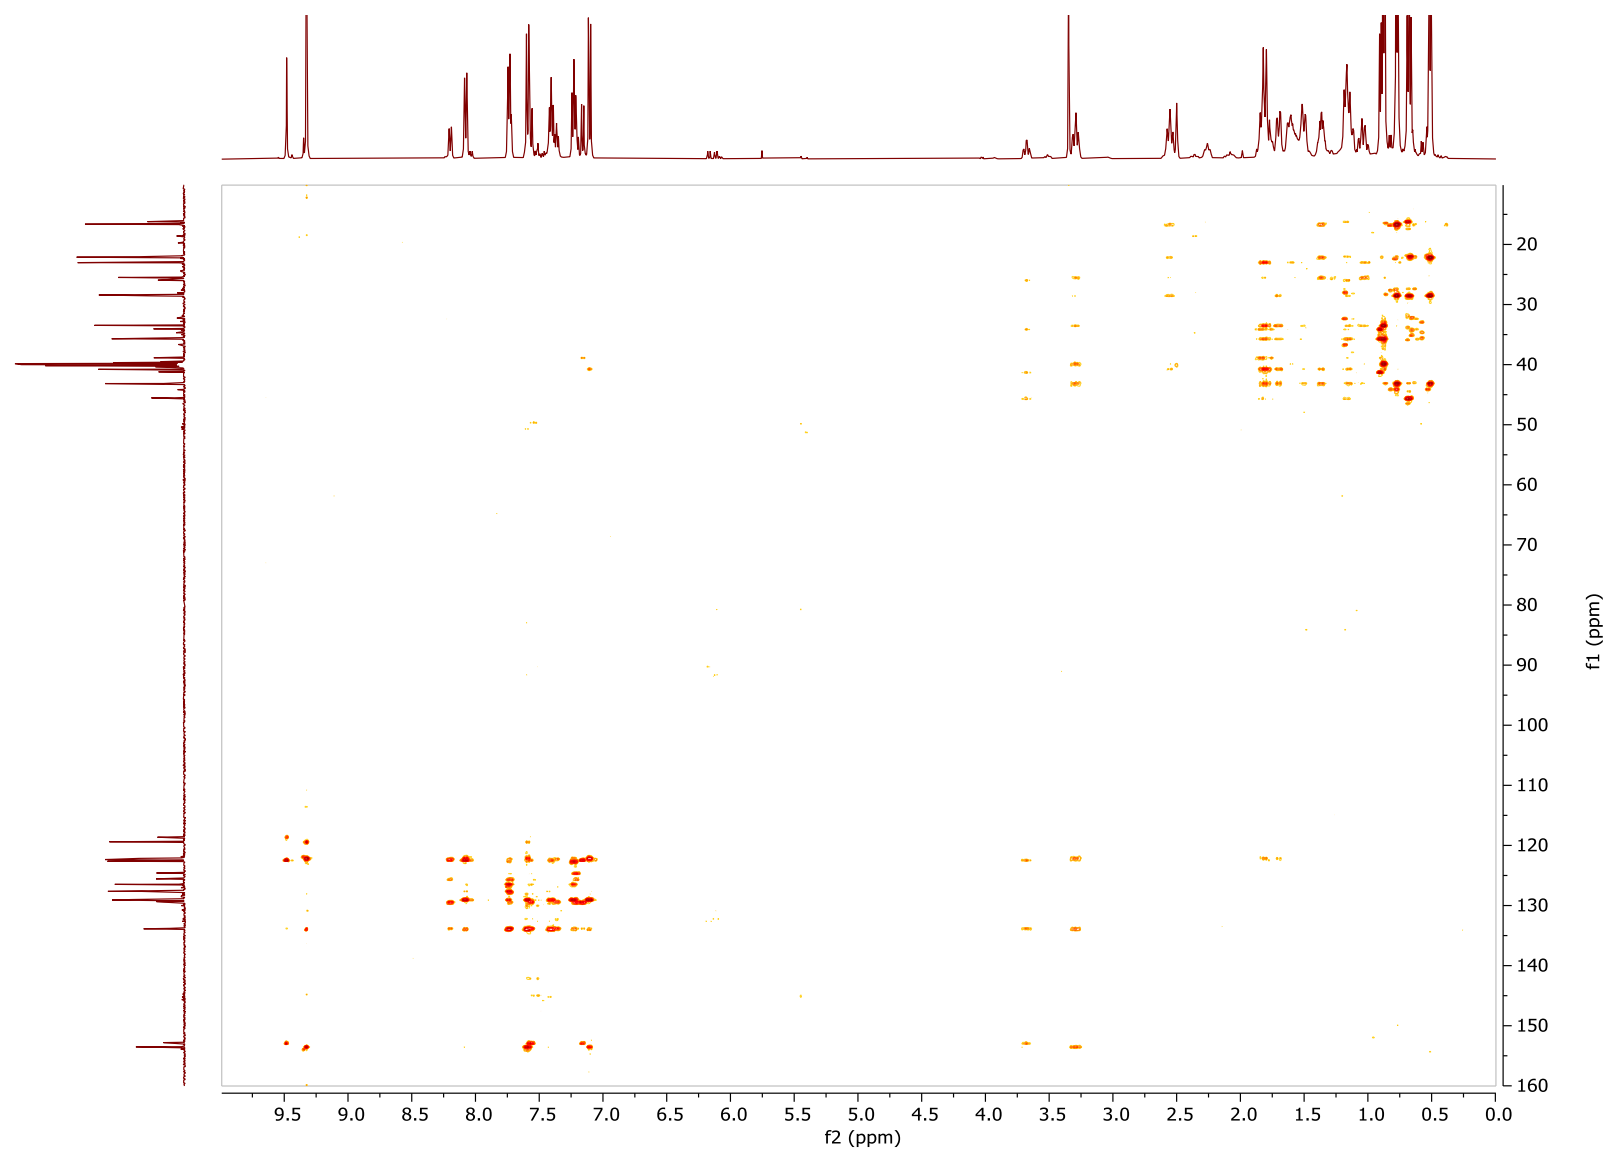

300 MHz  $^1\text{H}$  spectrum of **2b** in  $\text{CDCl}_3$  at 298 K

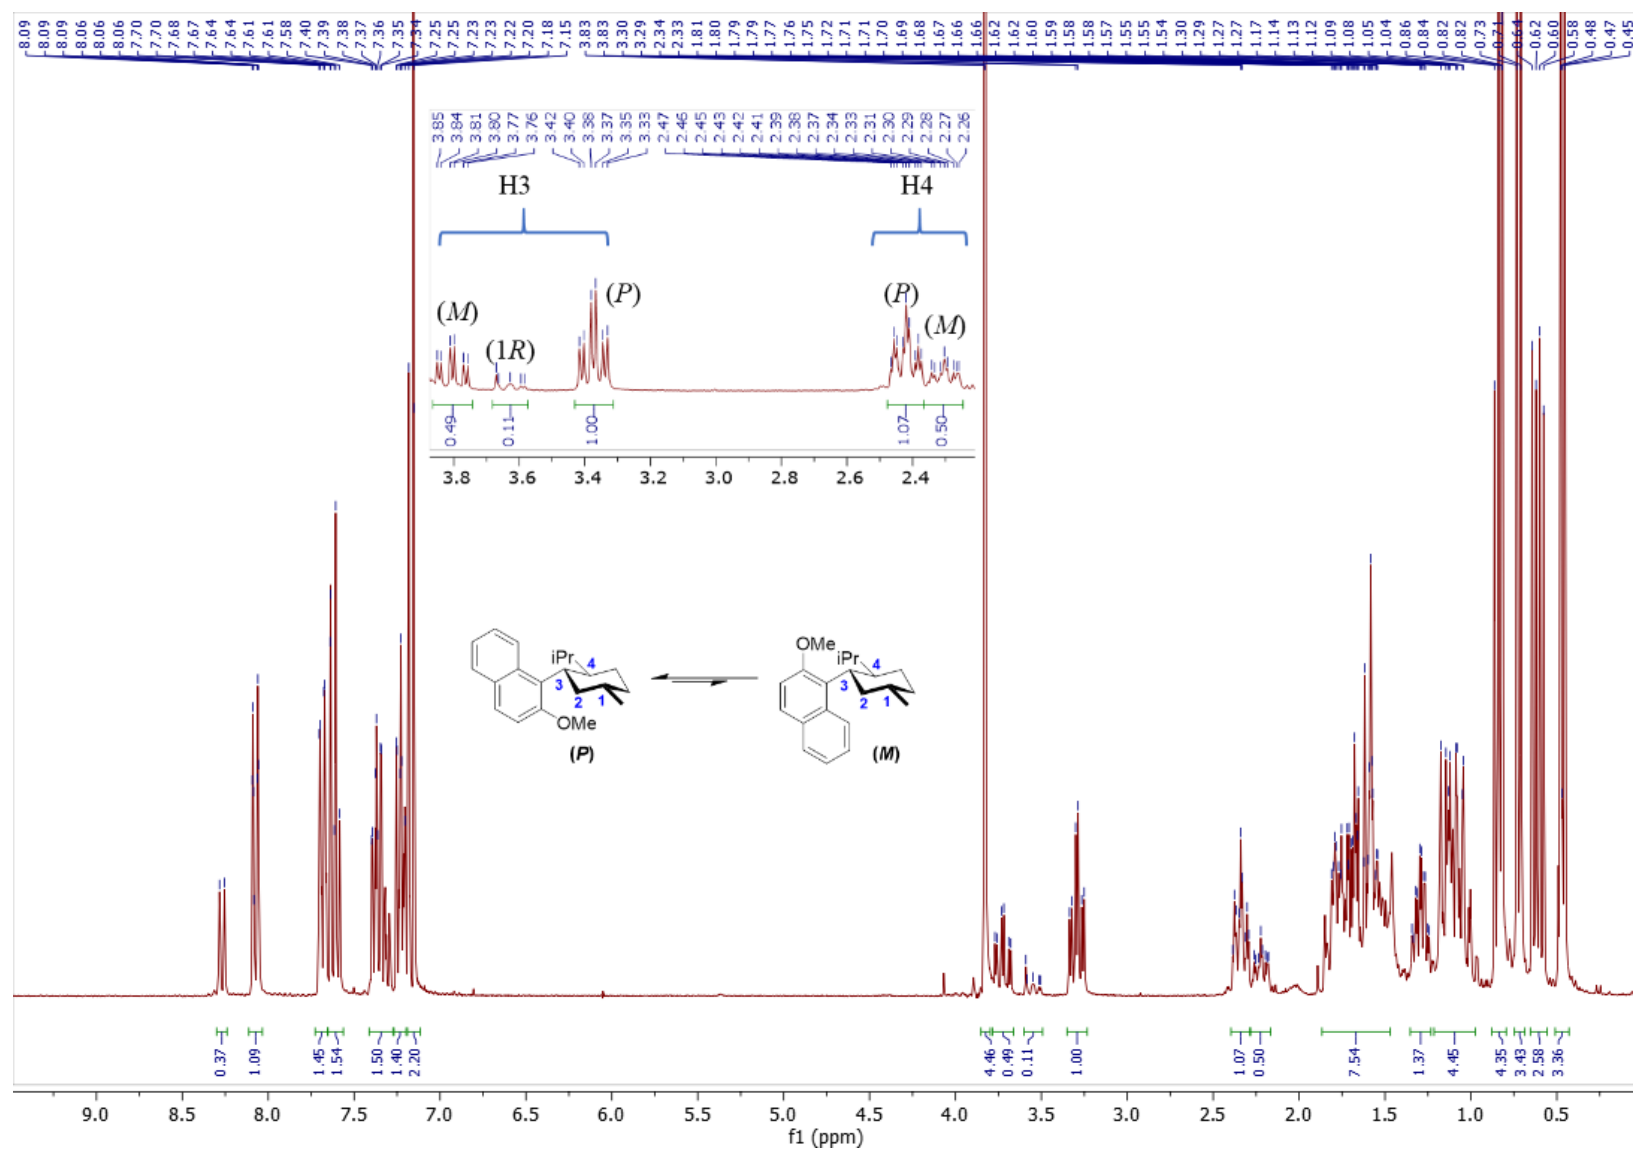



75 MHz  $^{13}\text{C}$  spectrum of **2b** in  $\text{CDCl}_3$  at 298 K

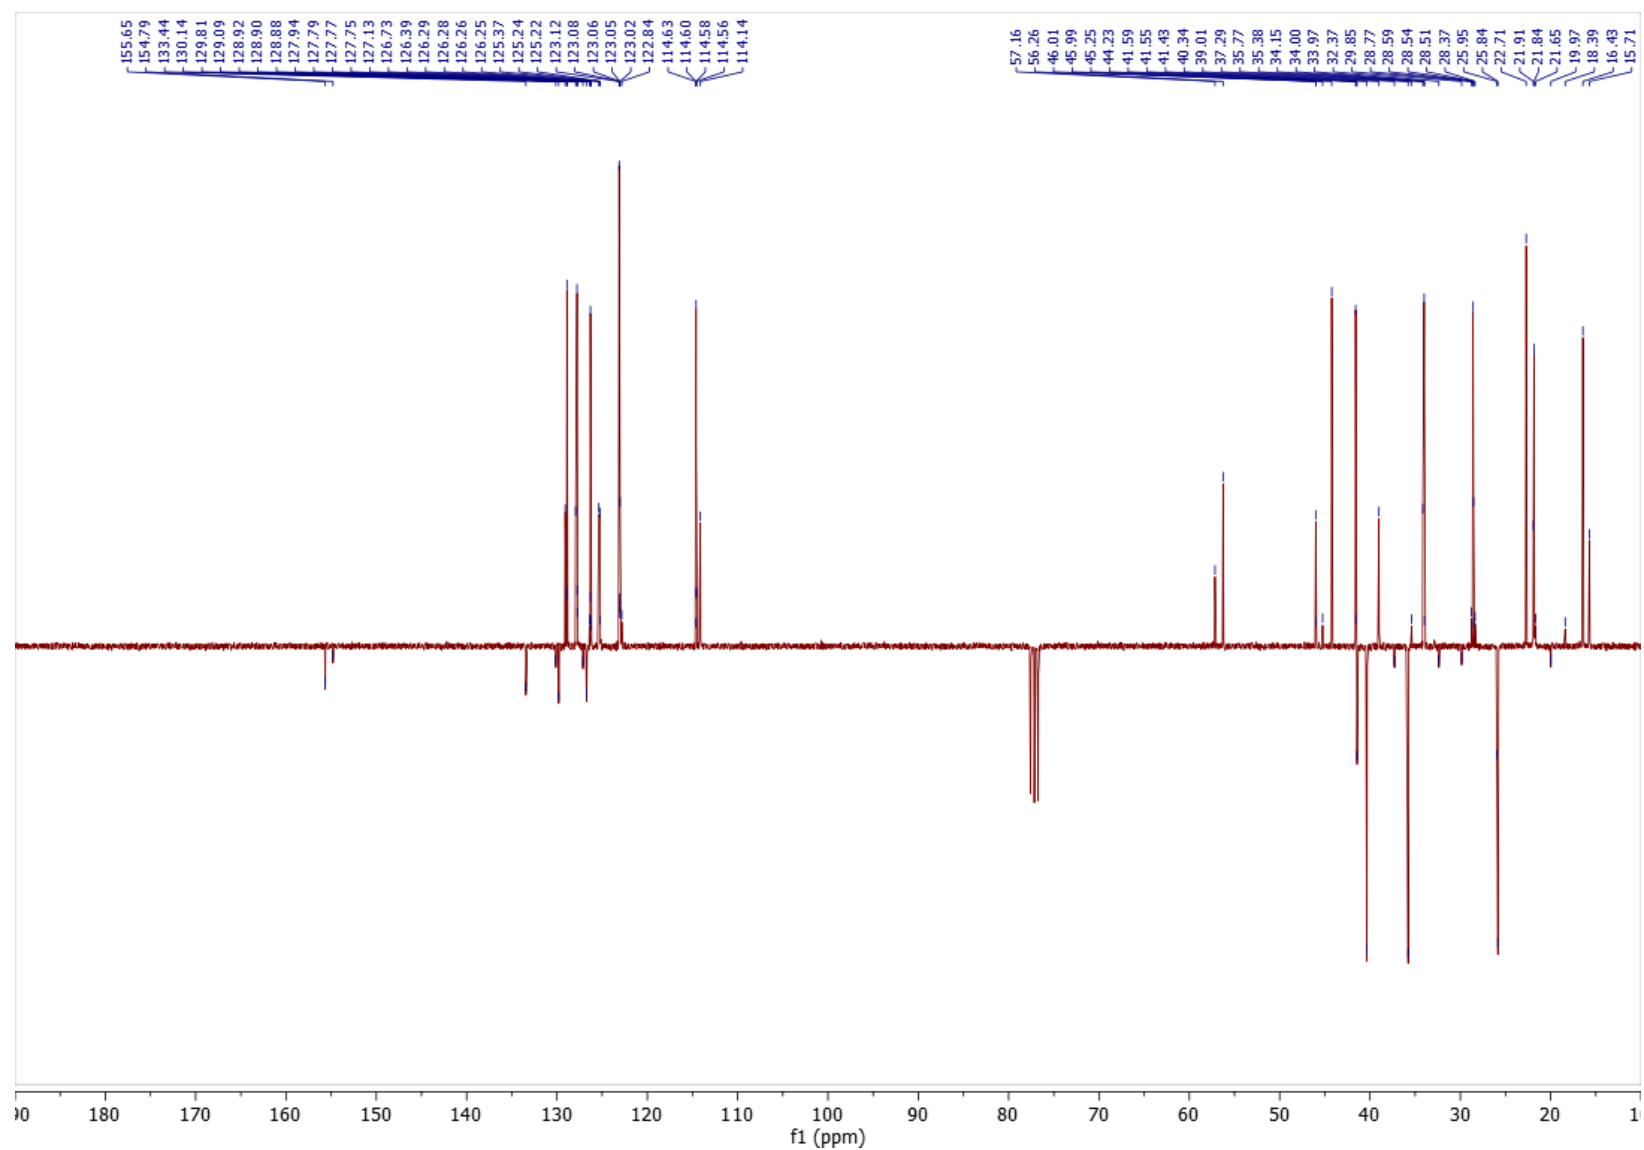

500 MHz  $^1\text{H}$  spectrum of **2b** in  $\text{DMSO-}d_6$  at 298 K

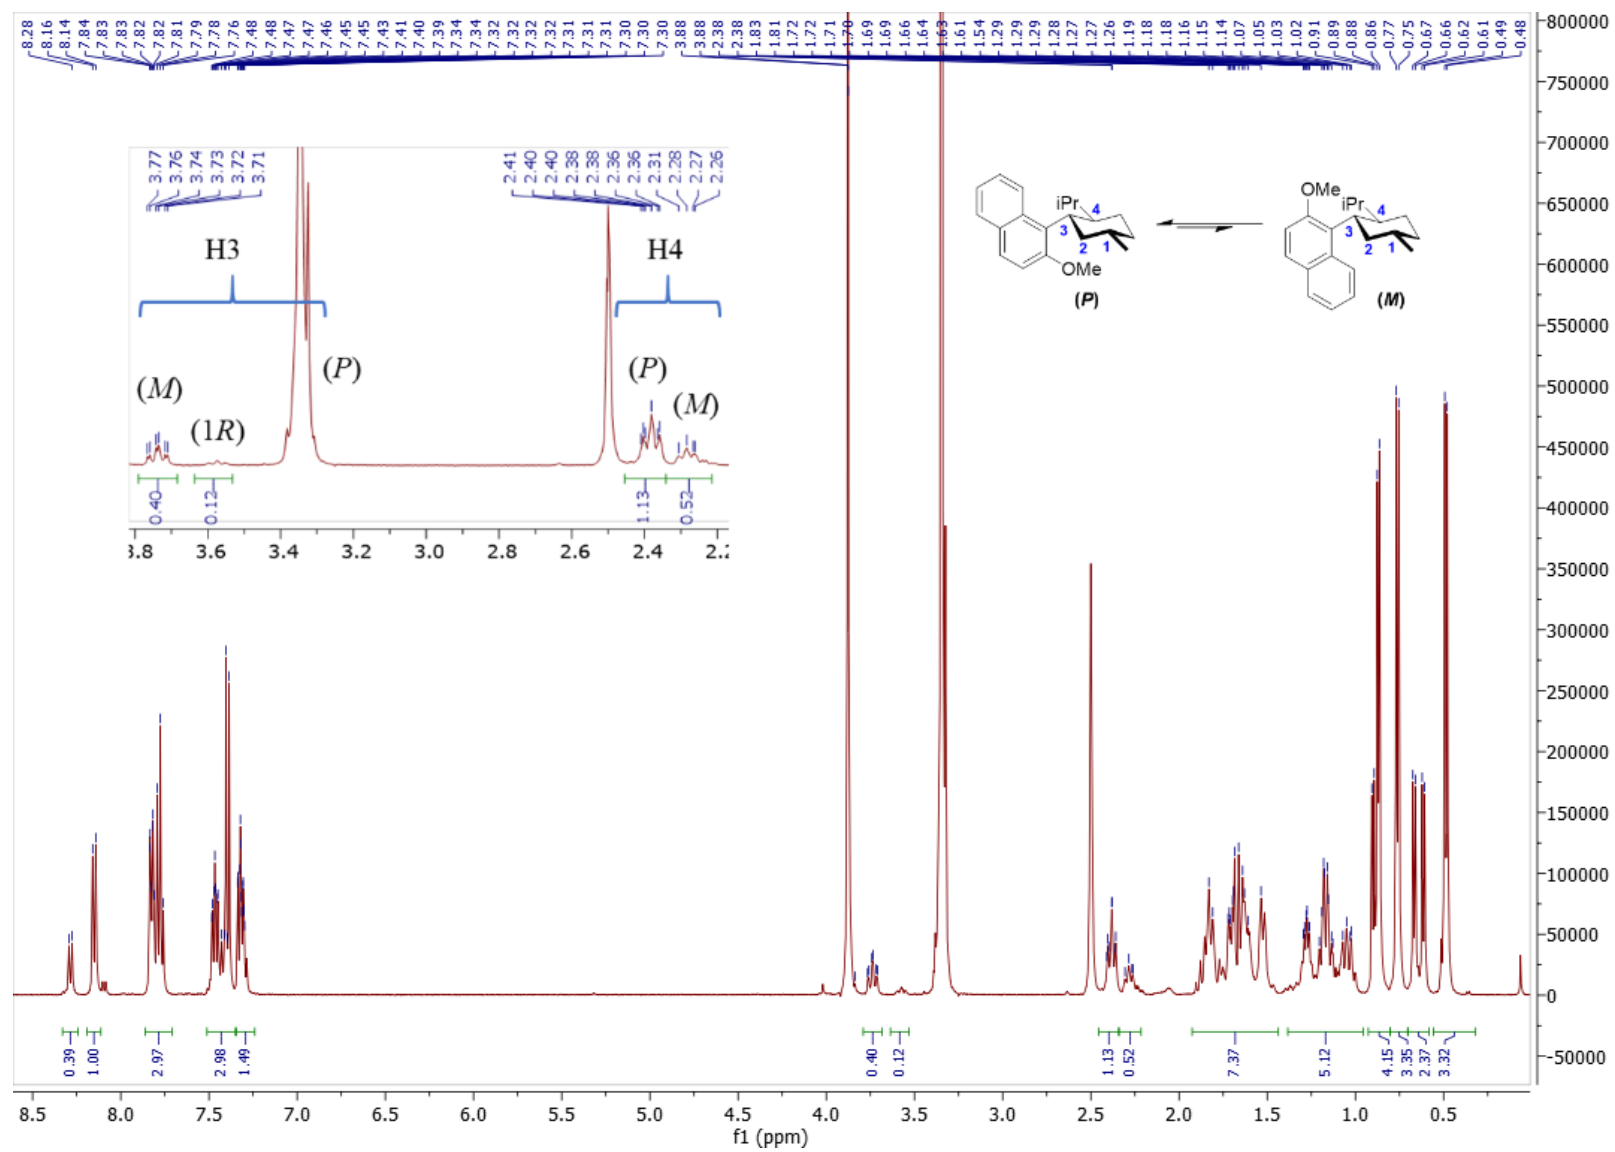

150 MHz  $^{13}\text{C}$  spectrum of **2b** in DMSO-*d*<sub>6</sub> at 298 K

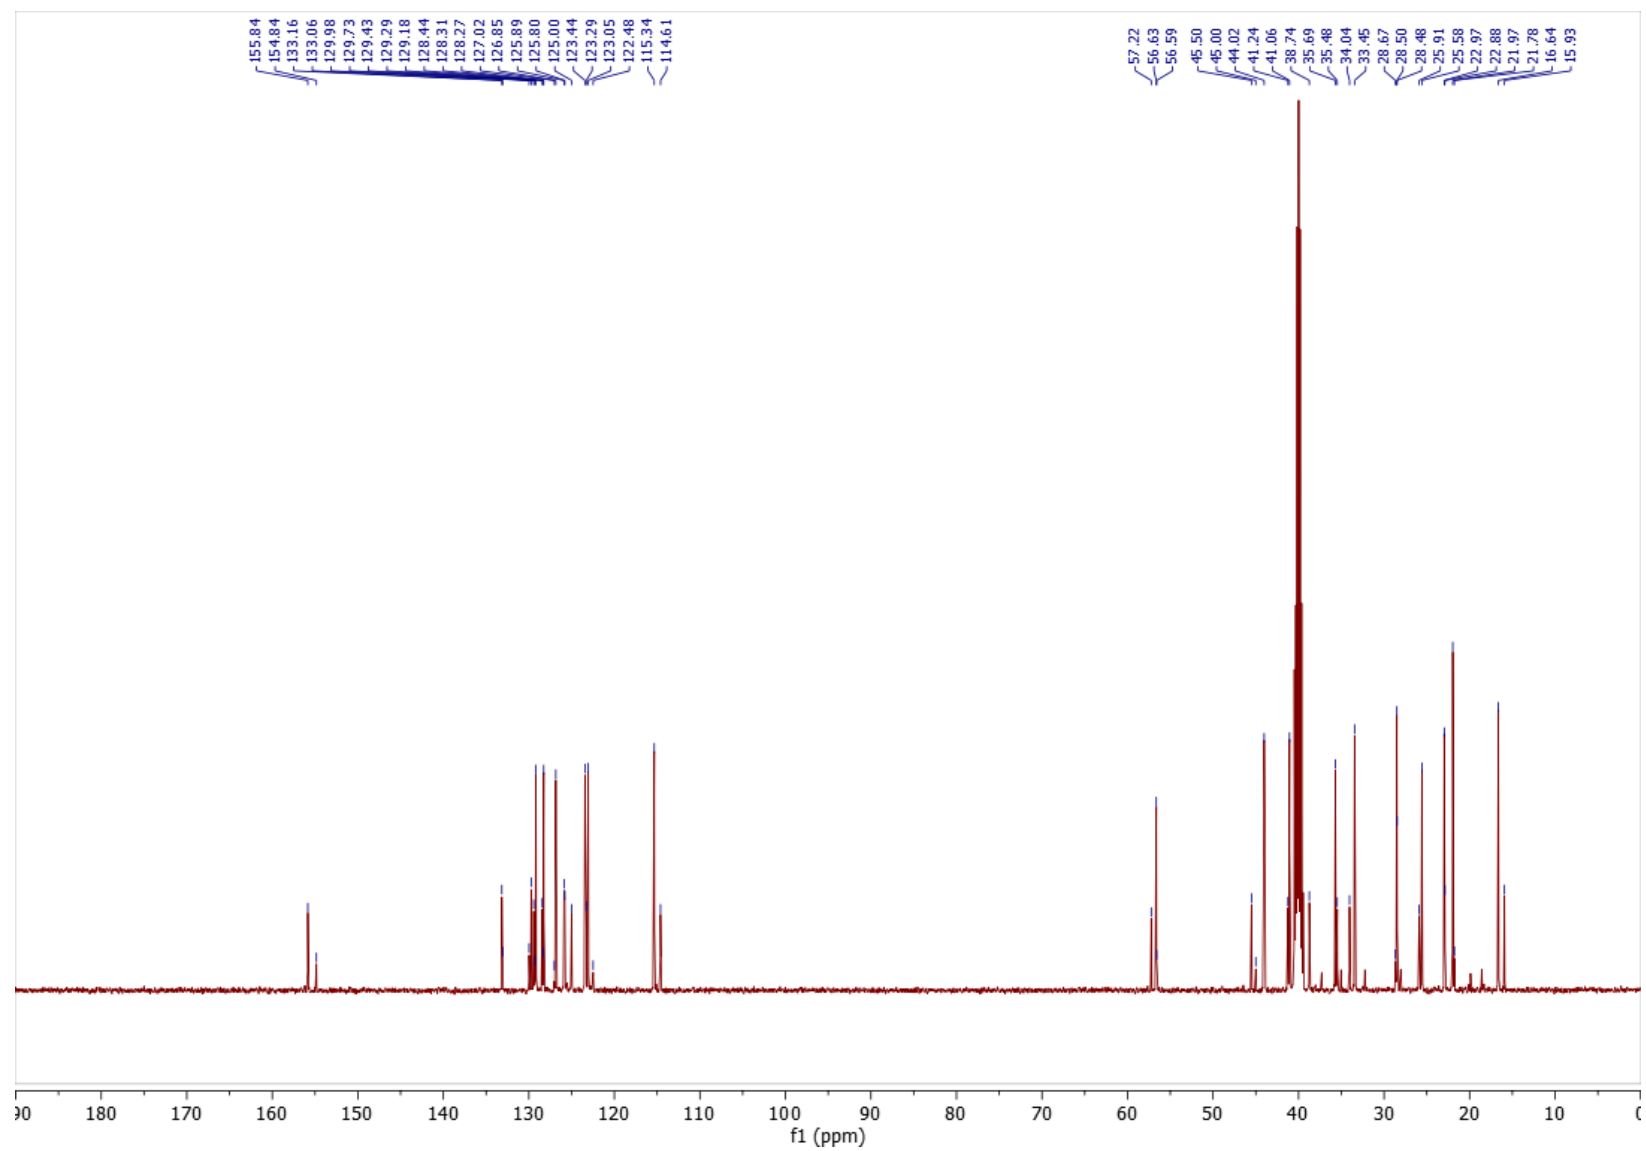

COSY spectrum of **2b** in DMSO-*d*<sub>6</sub> at 298 K

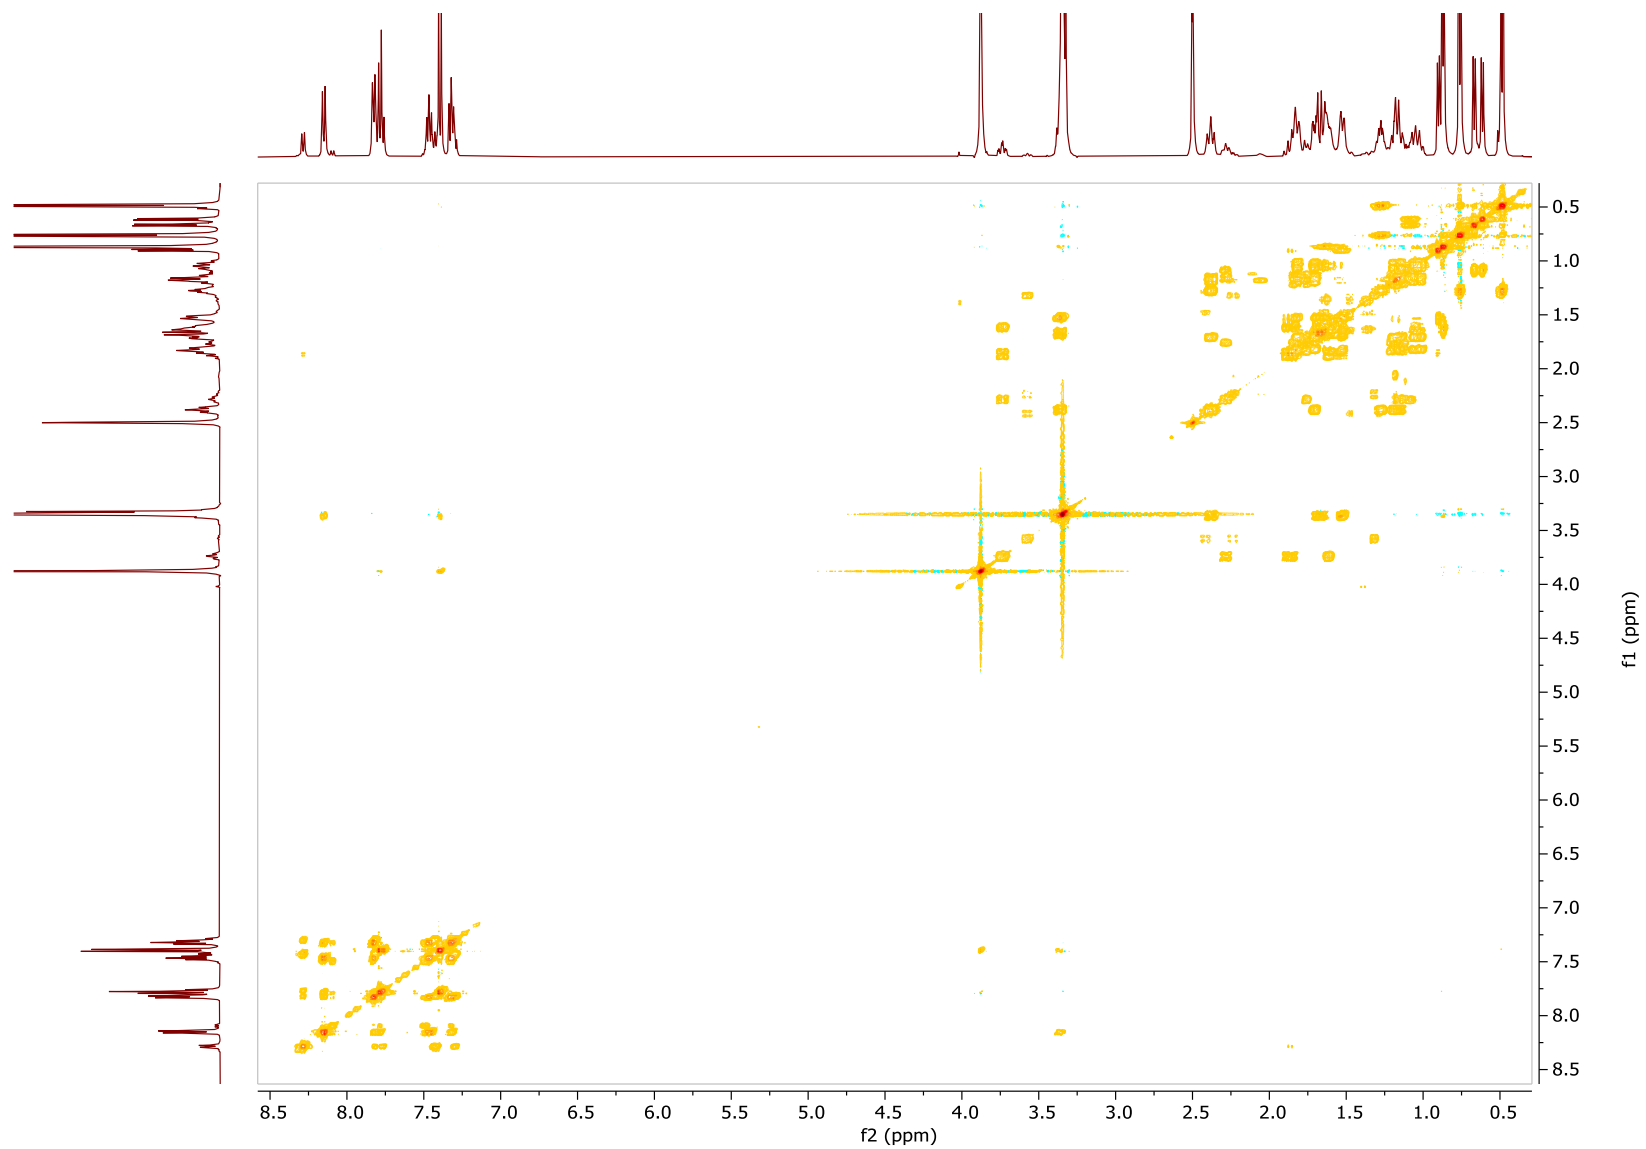

NOESY spectrum of **2b** in DMSO-*d*<sub>6</sub> at 298 K

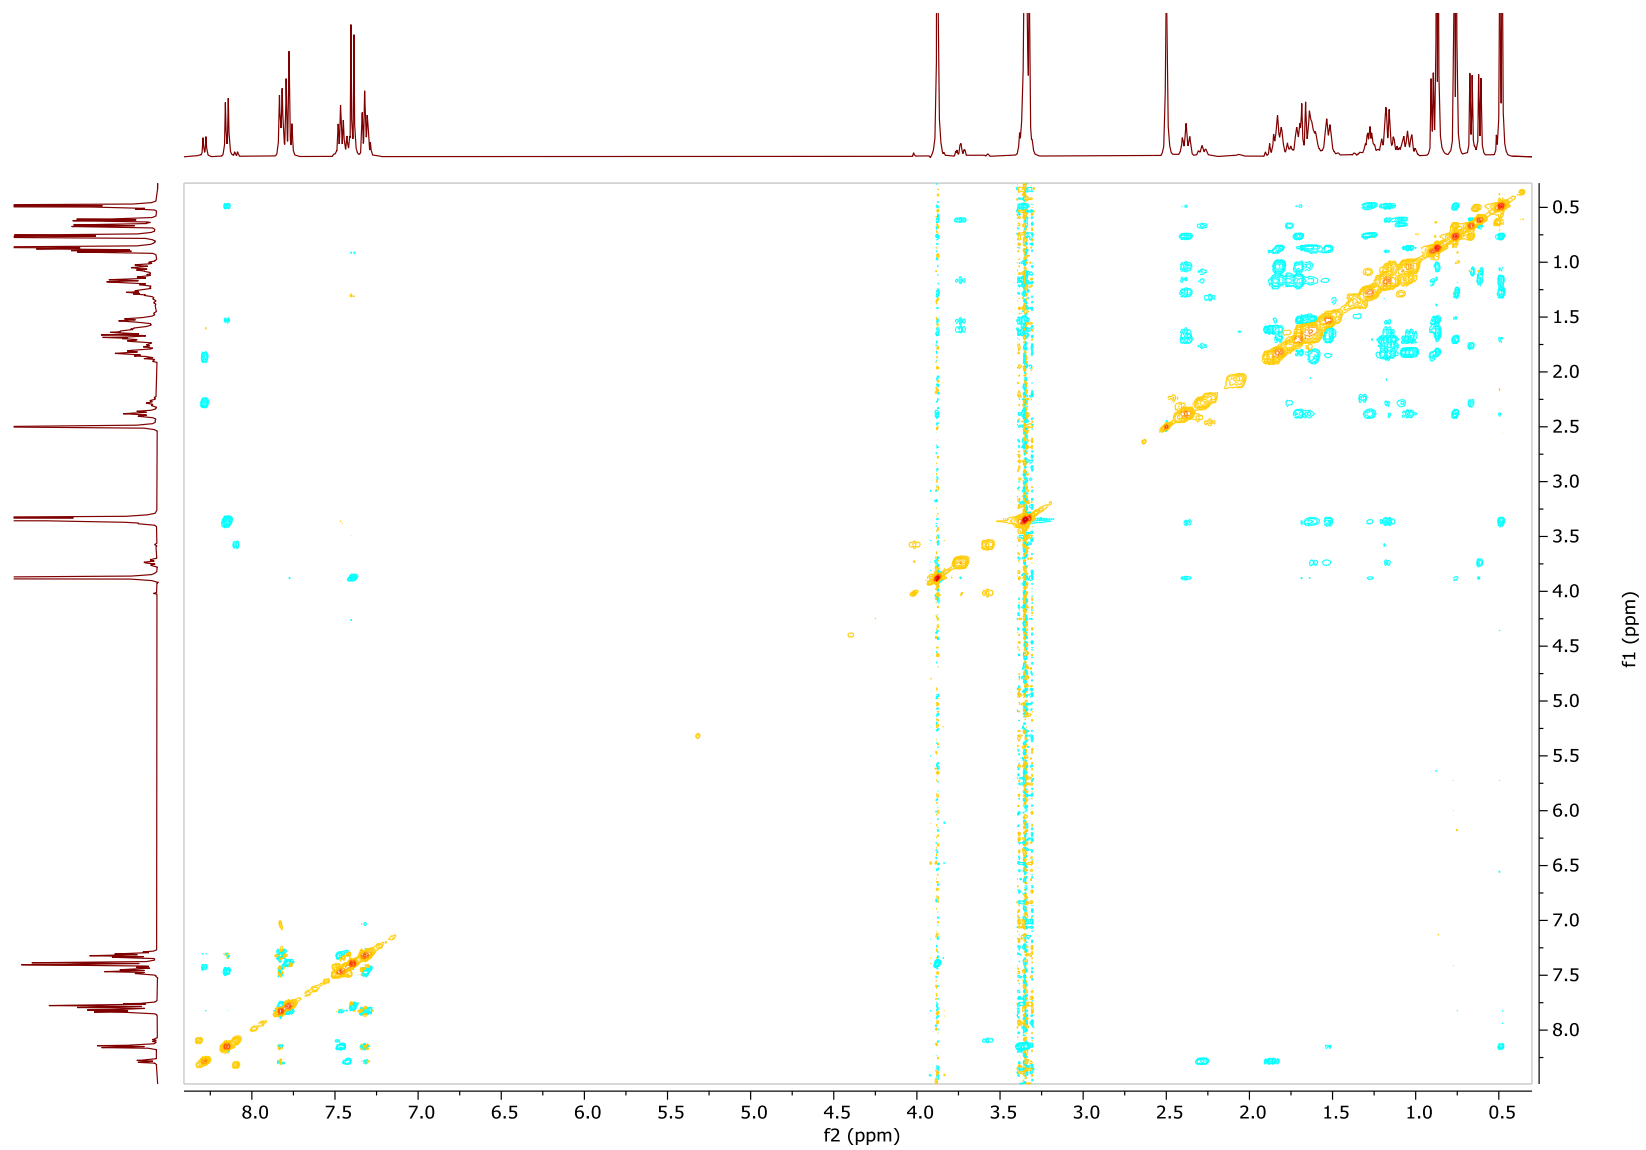

HSQC spectrum of **2b** in DMSO-*d*<sub>6</sub> at 298 K

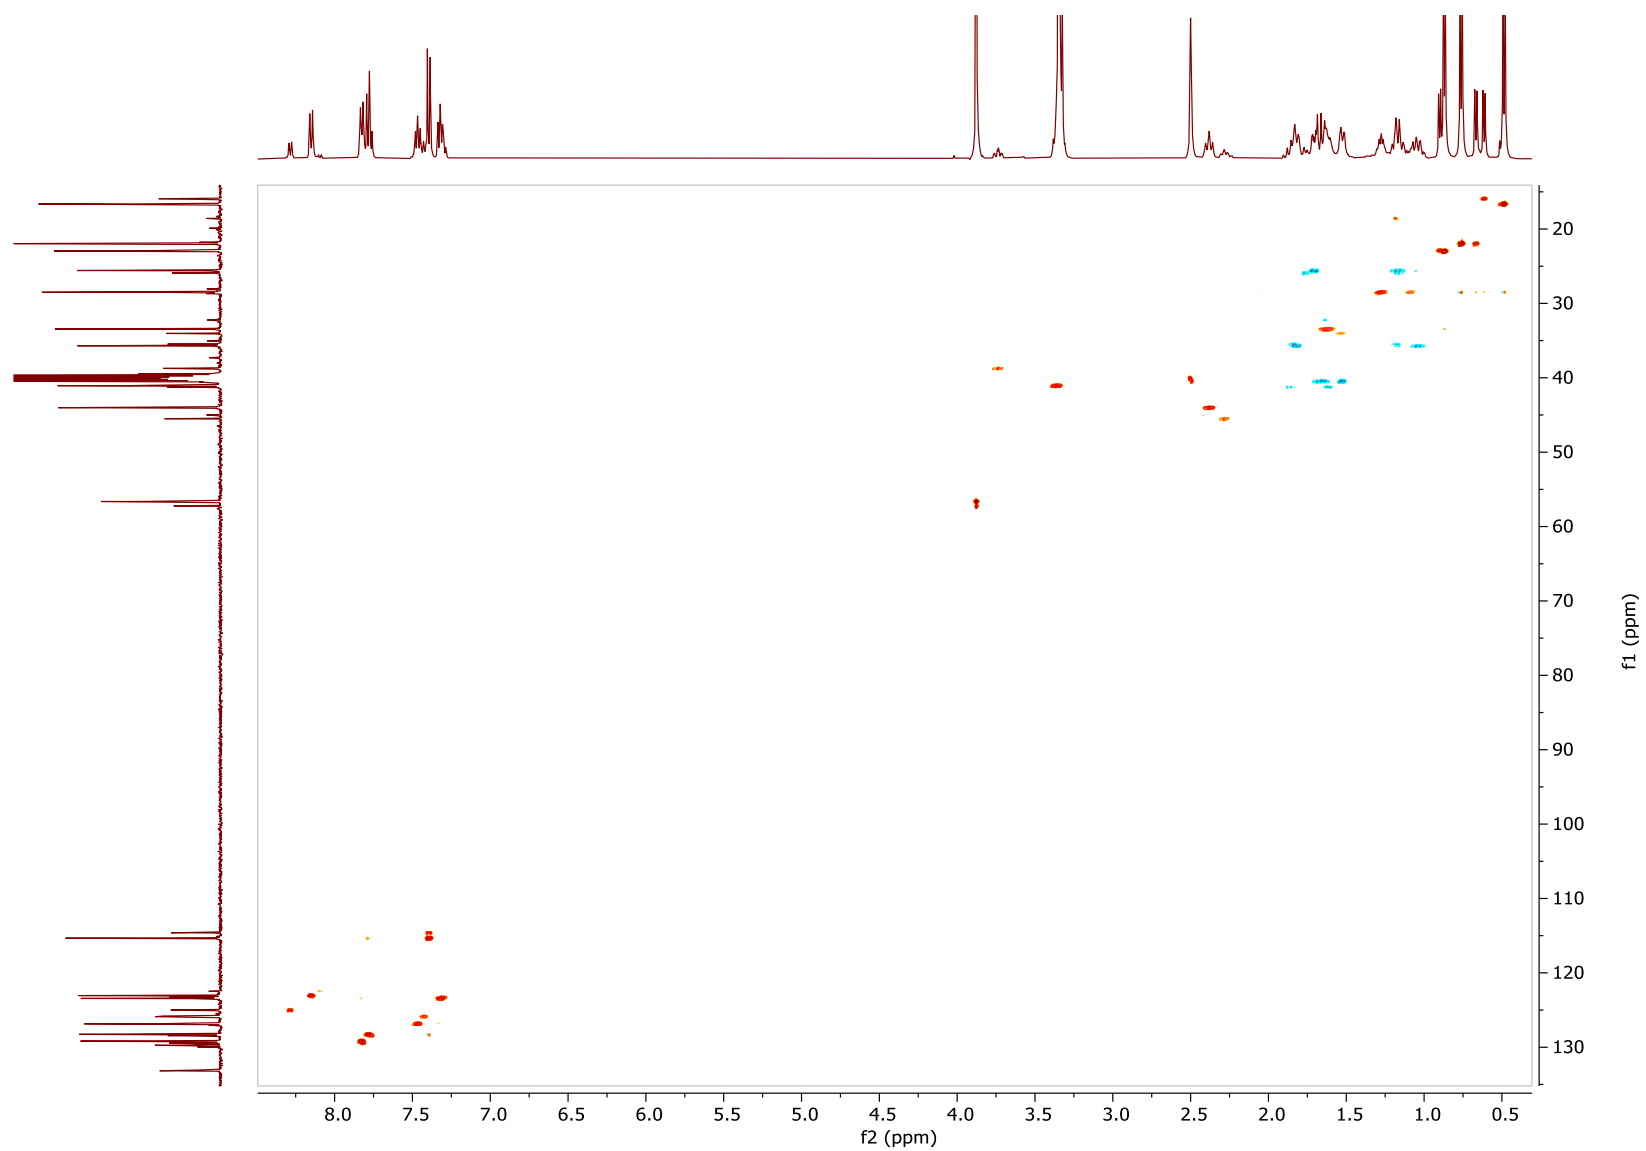

HMBC spectrum of **2b** in DMSO-*d*<sub>6</sub> at 298 K

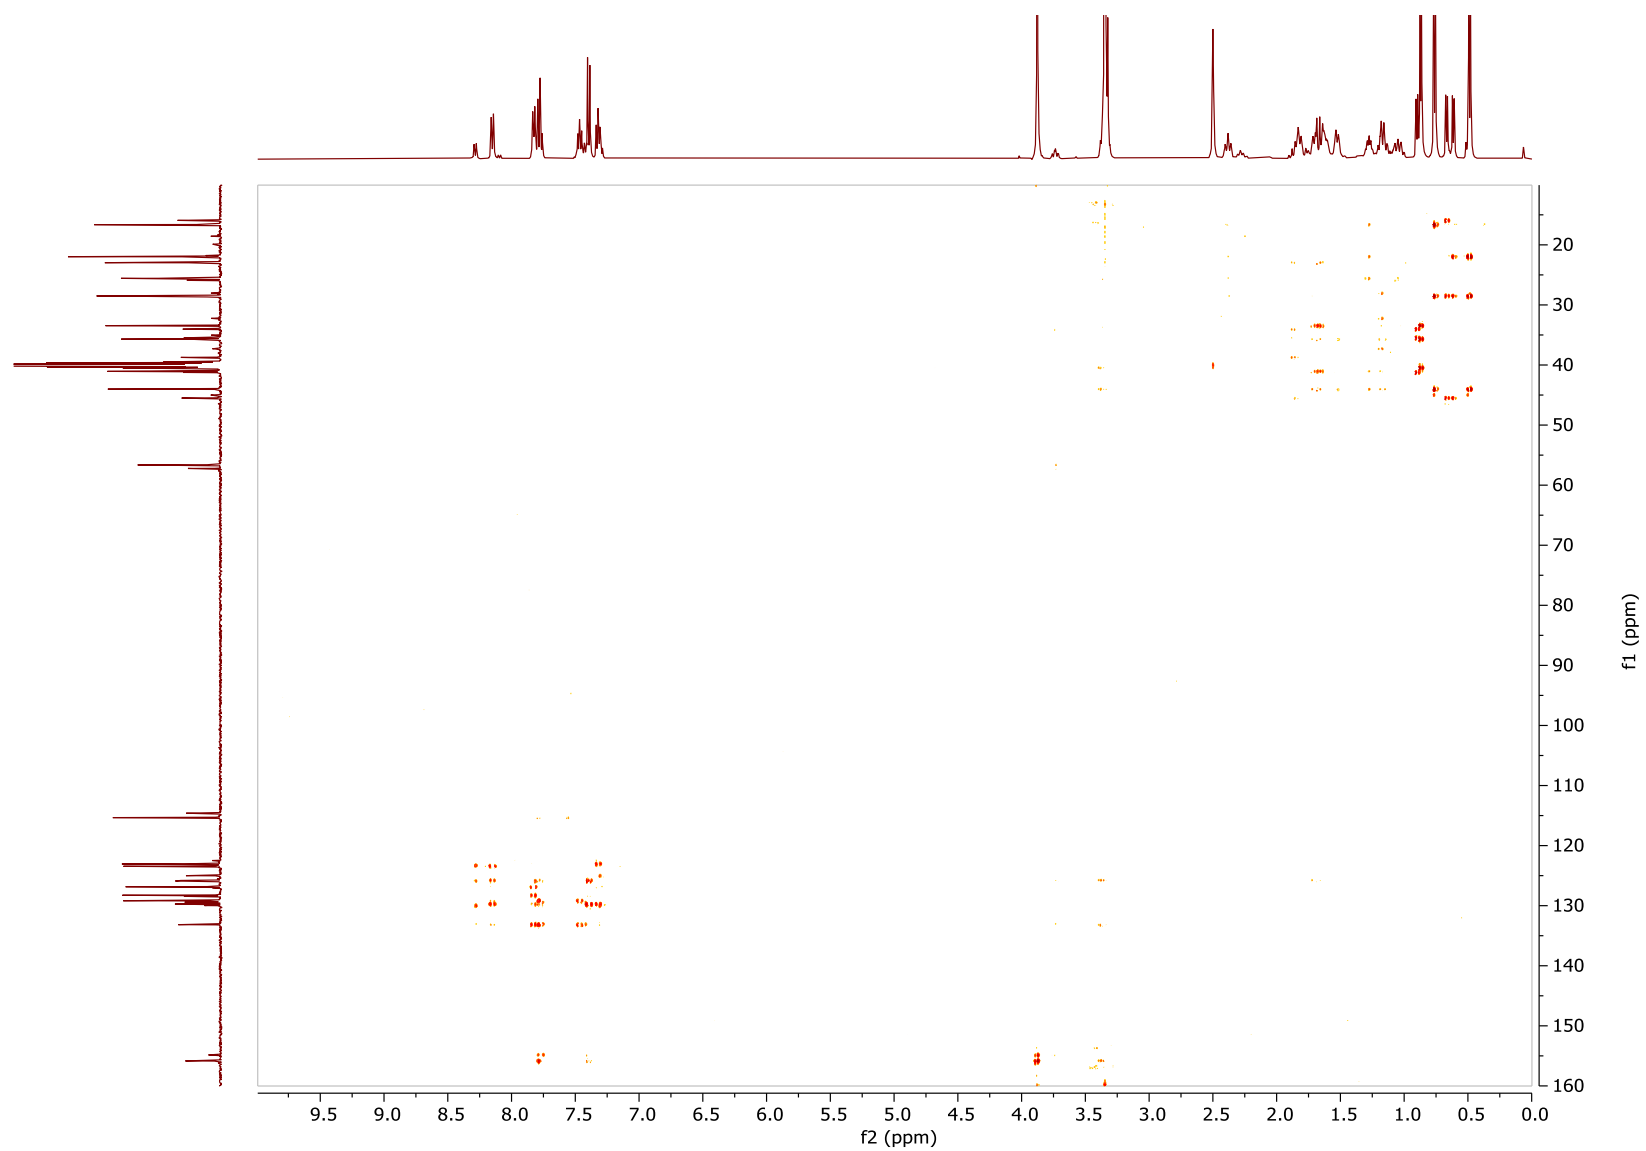

500 MHz  $^1\text{H}$  spectrum of **2c** in  $\text{DMSO-}d_6$  at 298 K

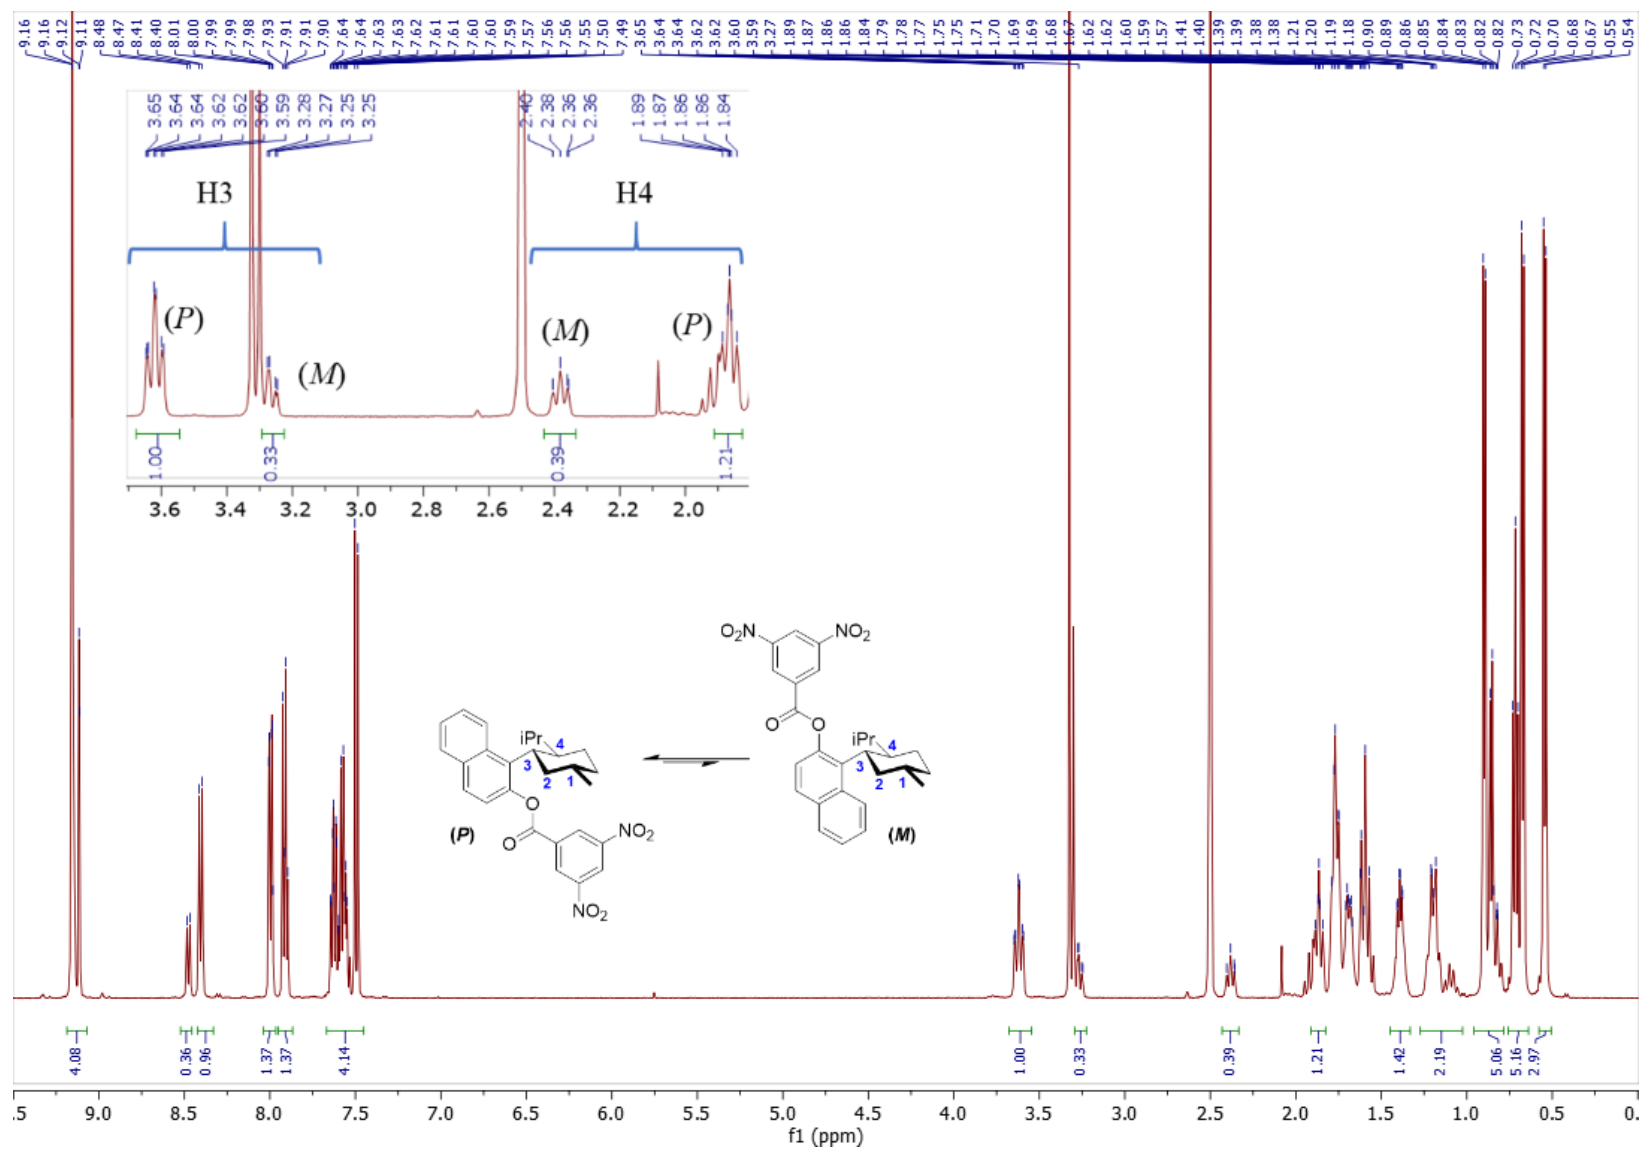



150 MHz  $^{13}\text{C}$  spectrum of **2c** in DMSO-*d*<sub>6</sub> at 298 K

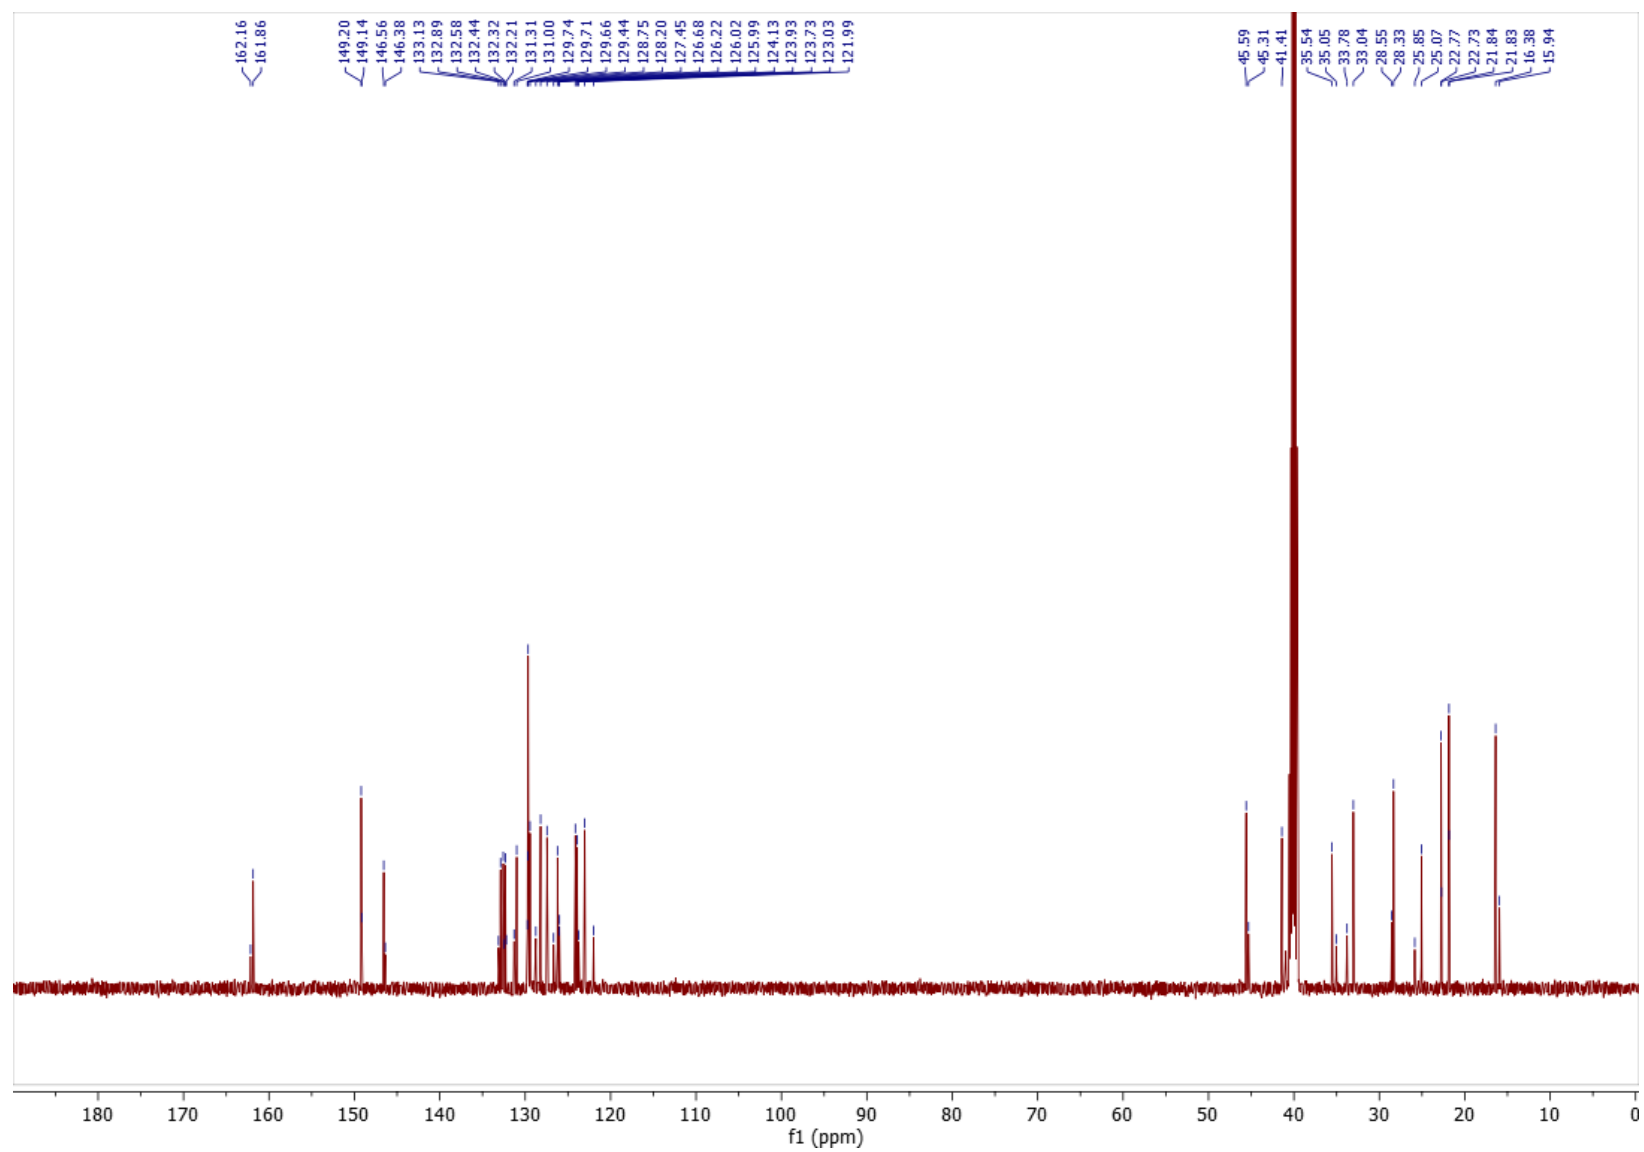

S21

COSY spectrum of **2c** in DMSO-*d*<sub>6</sub> at 298 K

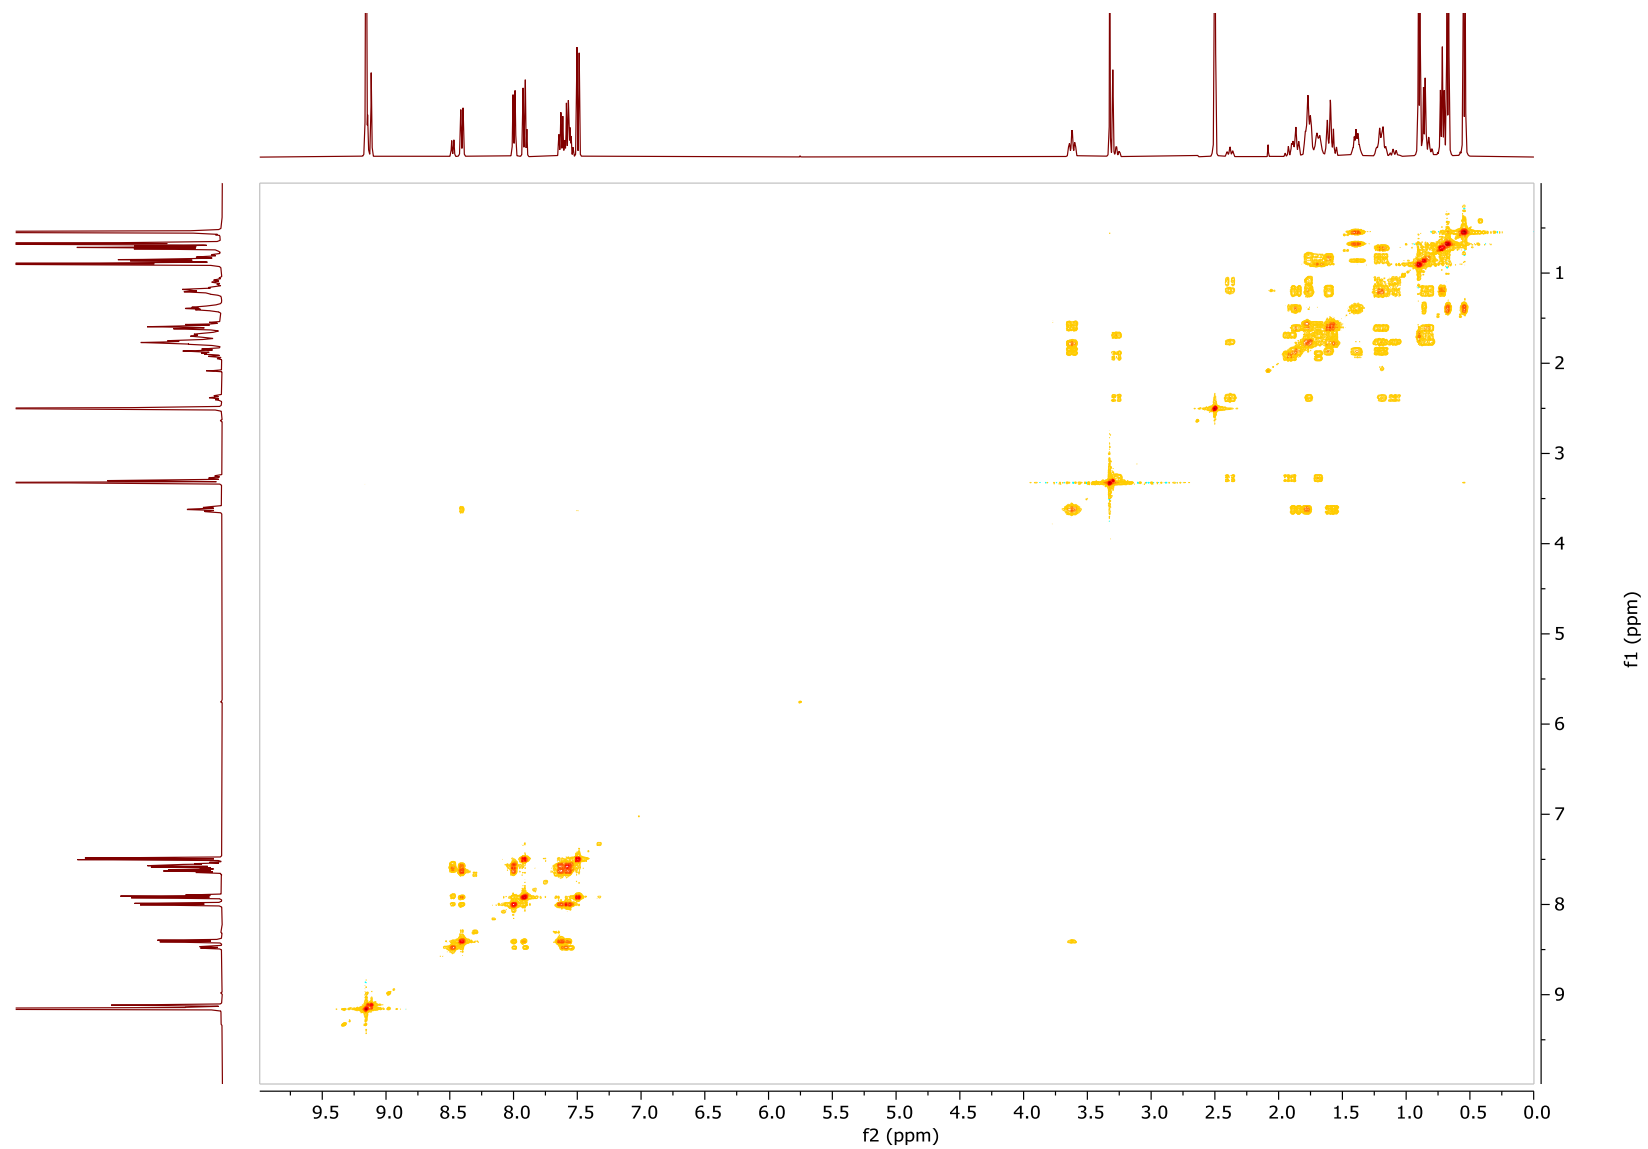

NOESY spectrum of **2c** in DMSO-*d*<sub>6</sub> at 298 K

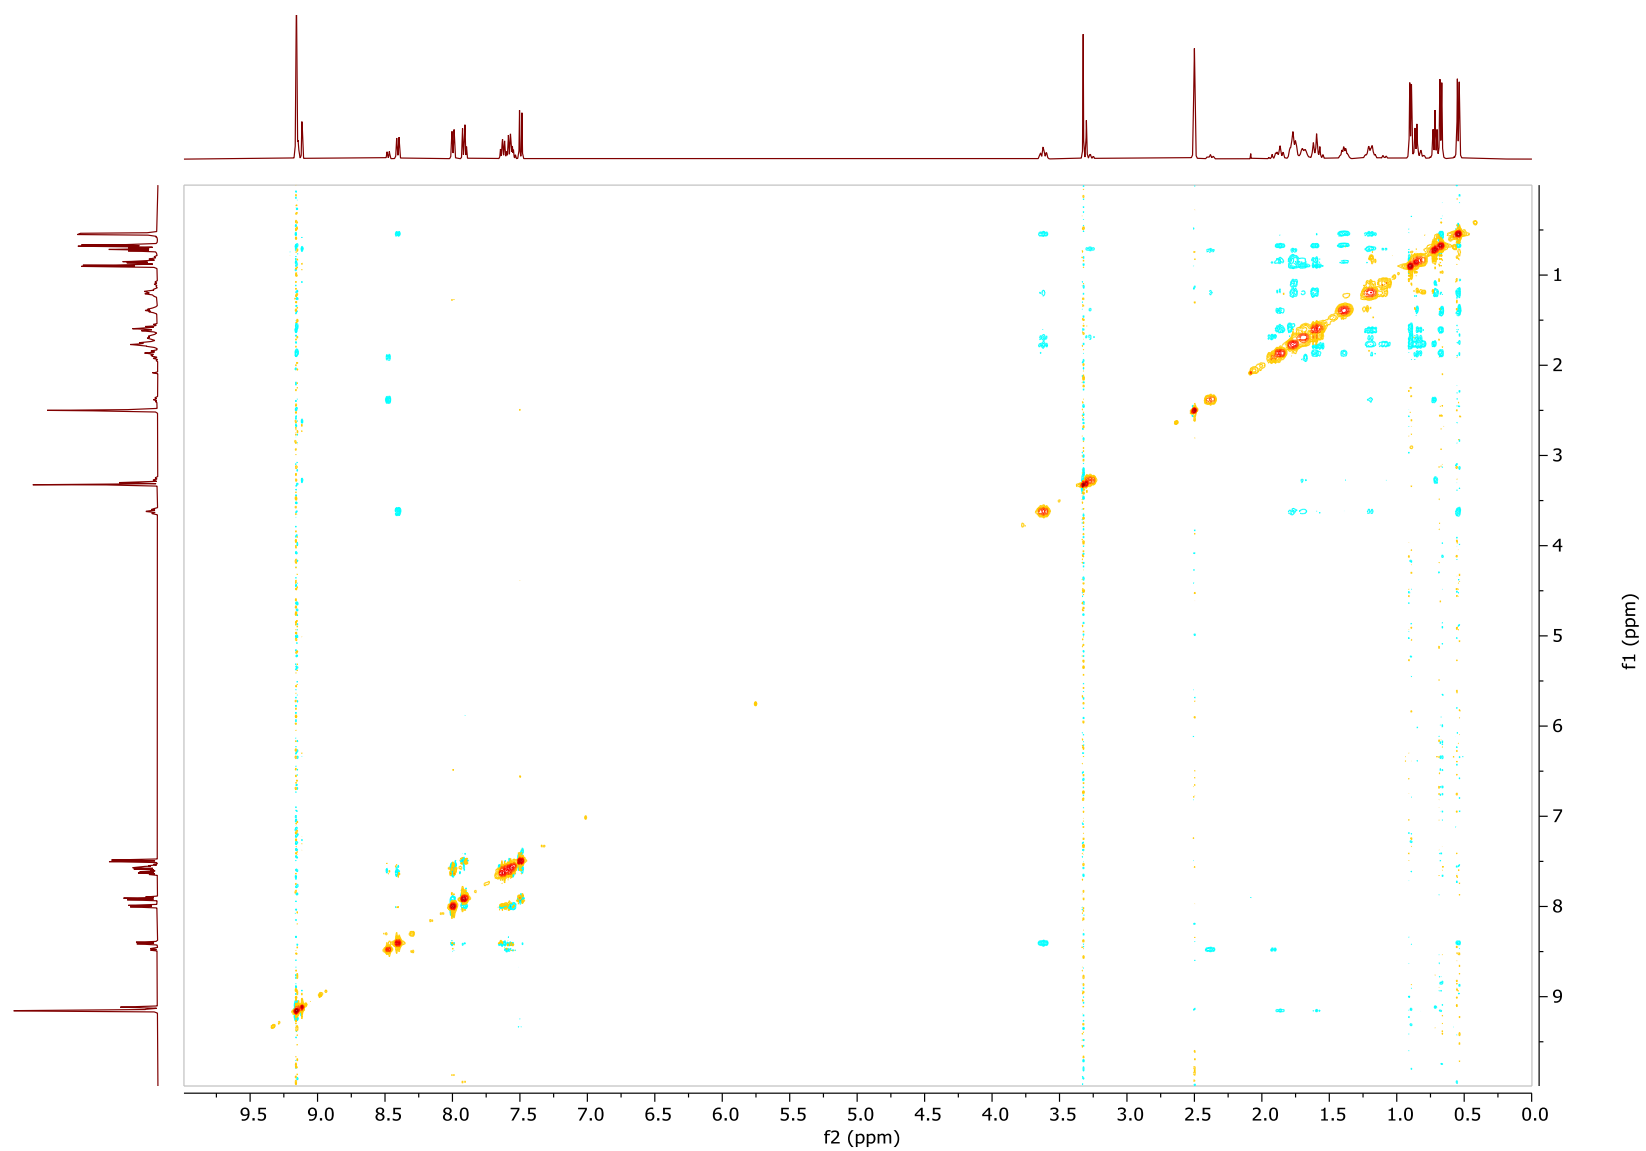

HSQC spectrum of **2c** in DMSO-*d*<sub>6</sub> at 298 K

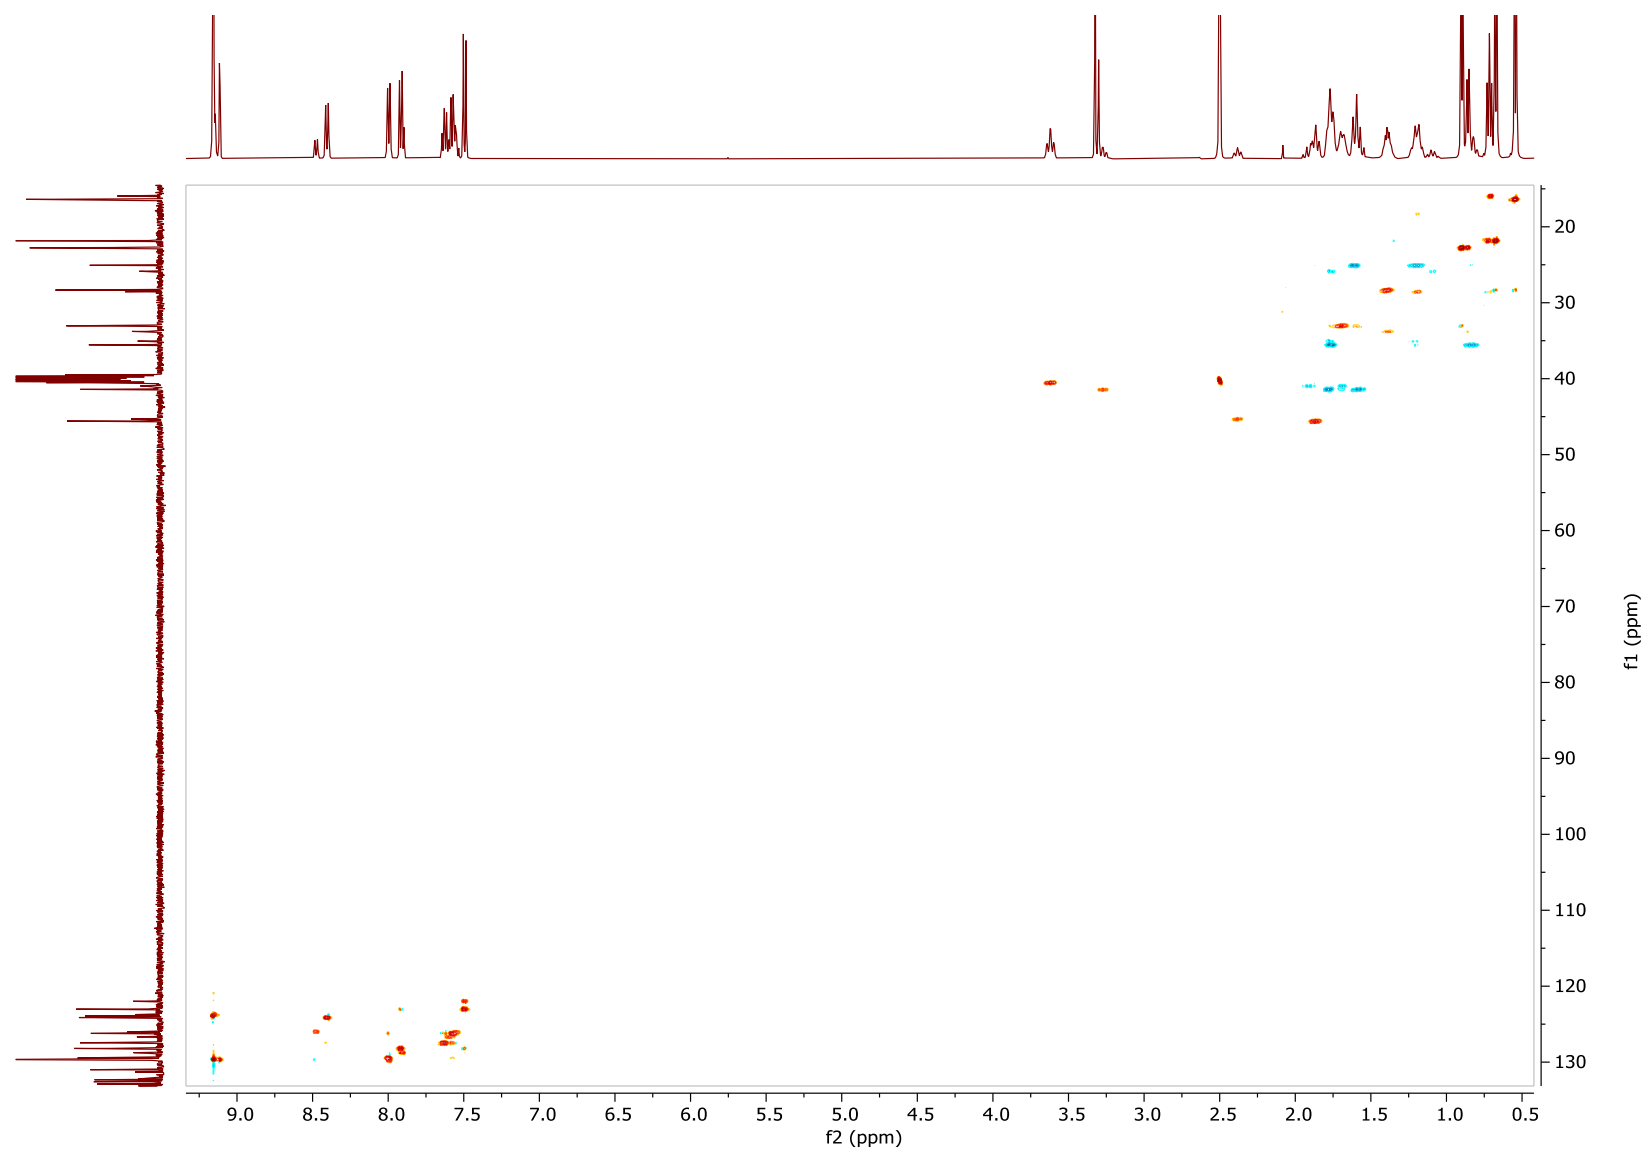

HMBC spectrum of **2c** in DMSO-*d*<sub>6</sub> at 298 K

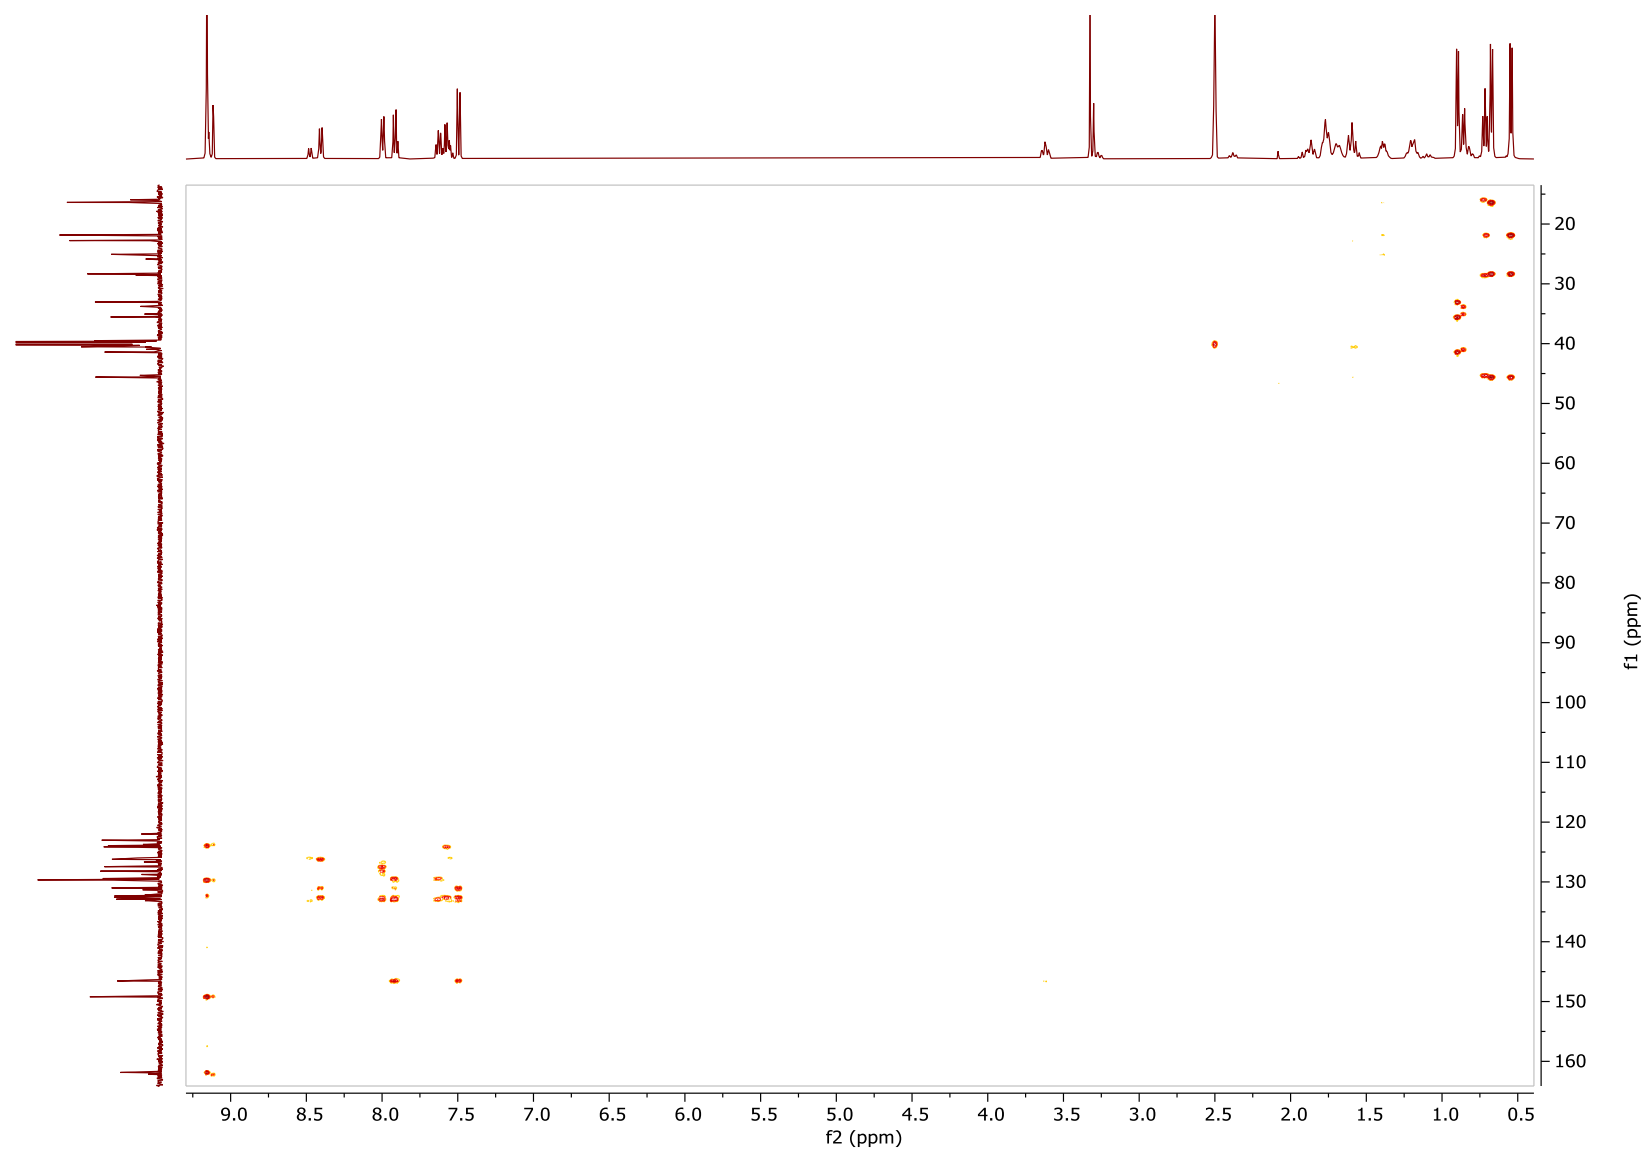

300 MHz  $^1\text{H}$  spectrum of **3b** in  $\text{CDCl}_3$  at 298 K

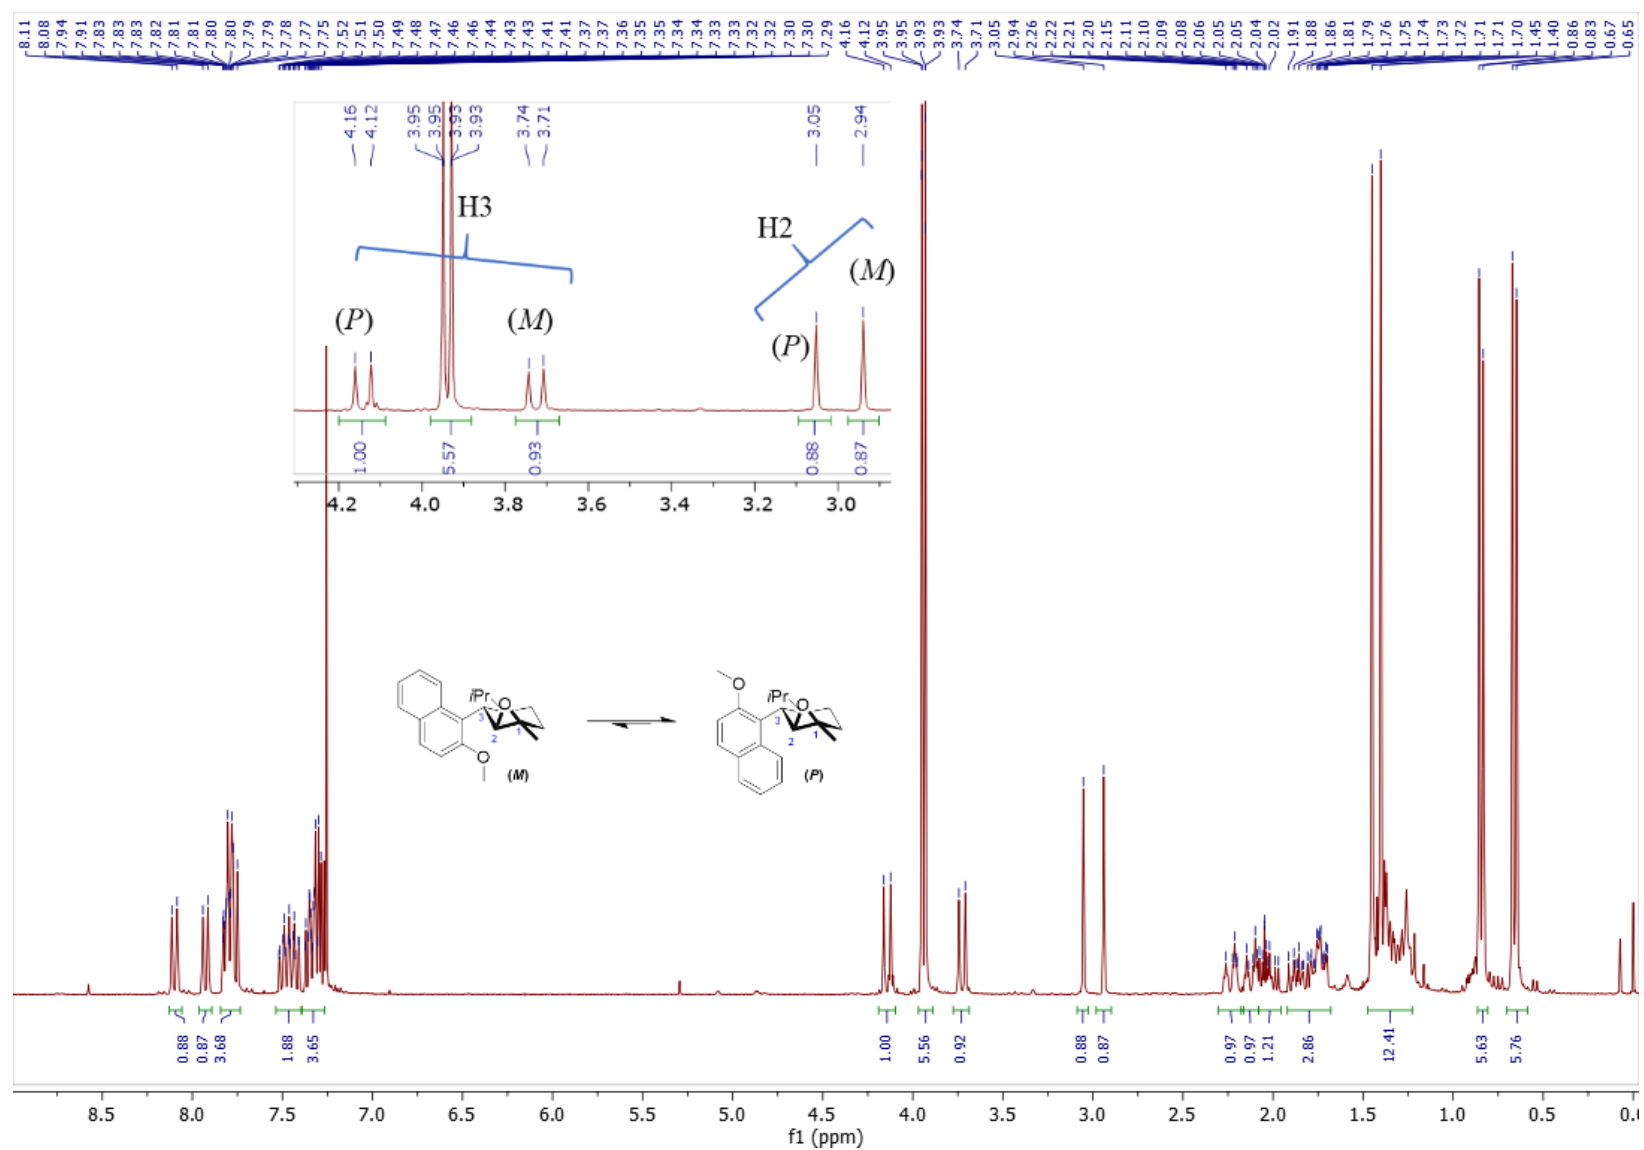

75 MHz  $^{13}\text{C}$  spectrum of **3b** in  $\text{CDCl}_3$  at 298 K

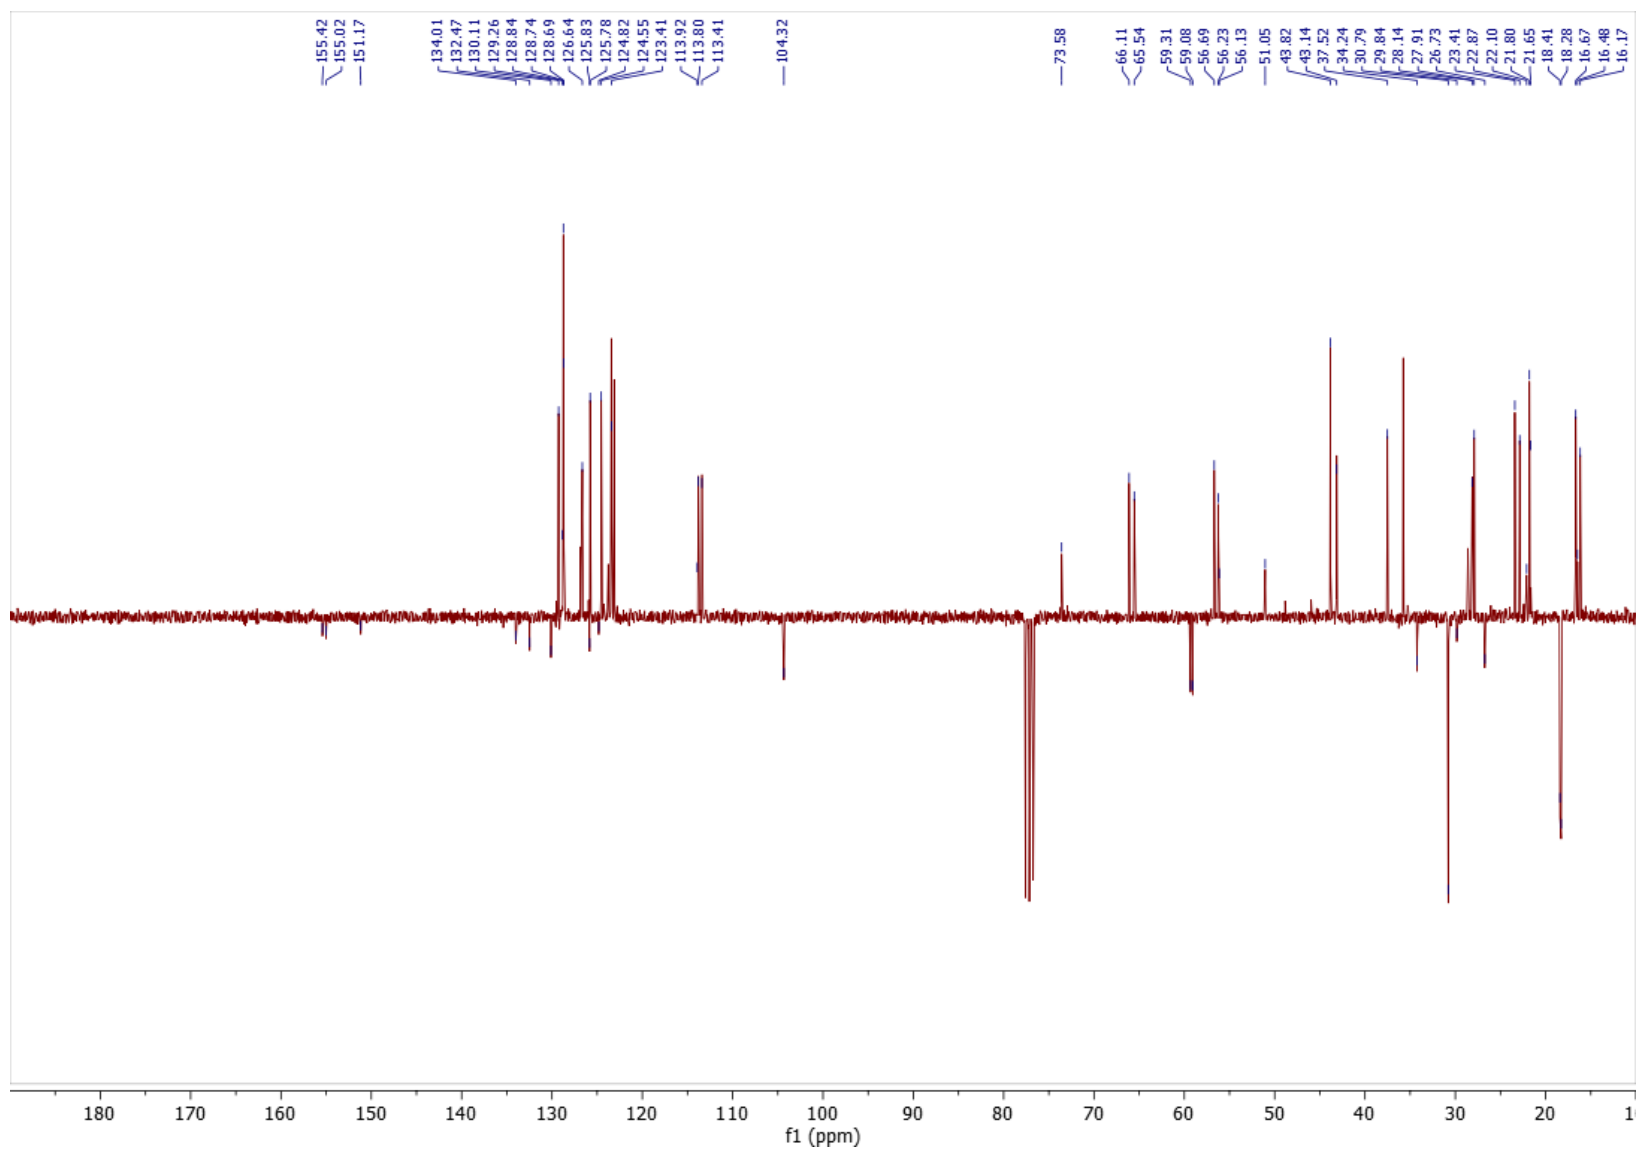

500 MHz  $^1\text{H}$  spectrum of **3b** in DMSO- $d_6$  at 298 K

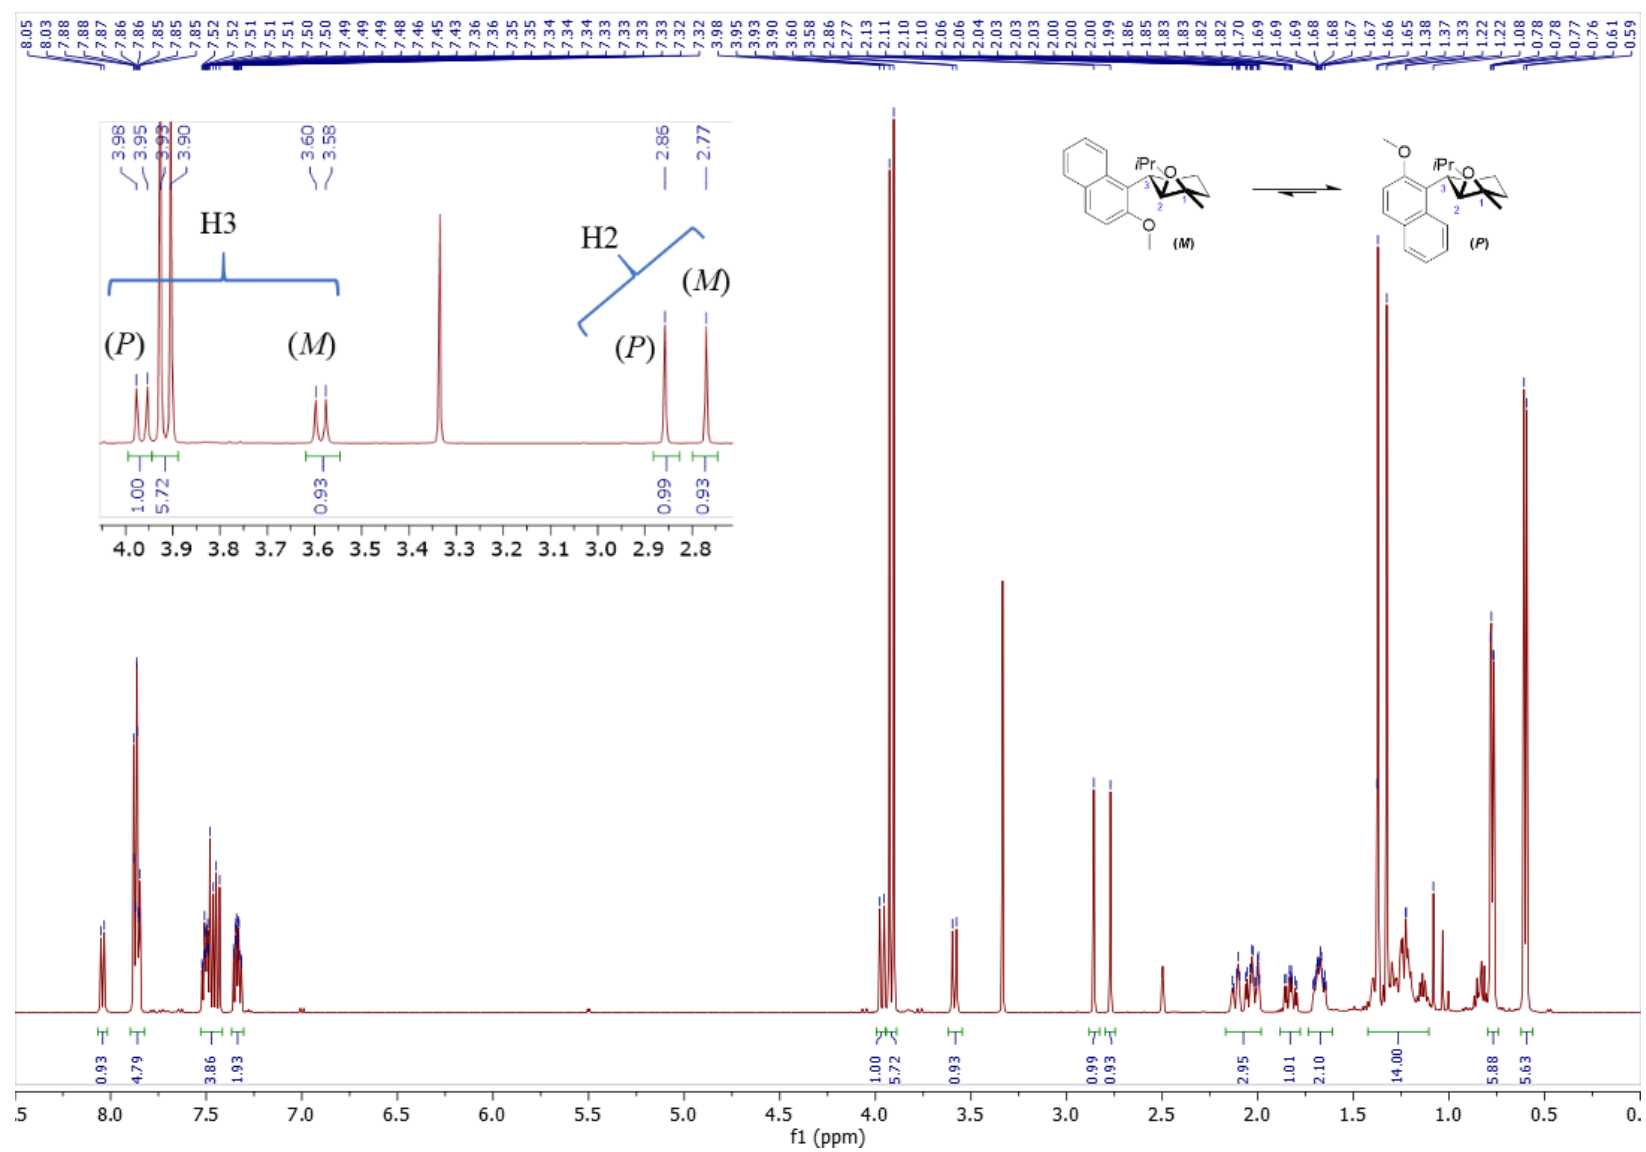



150 MHz  $^{13}\text{C}$  spectrum of **3b** in DMSO-*d*<sub>6</sub> at 298 K

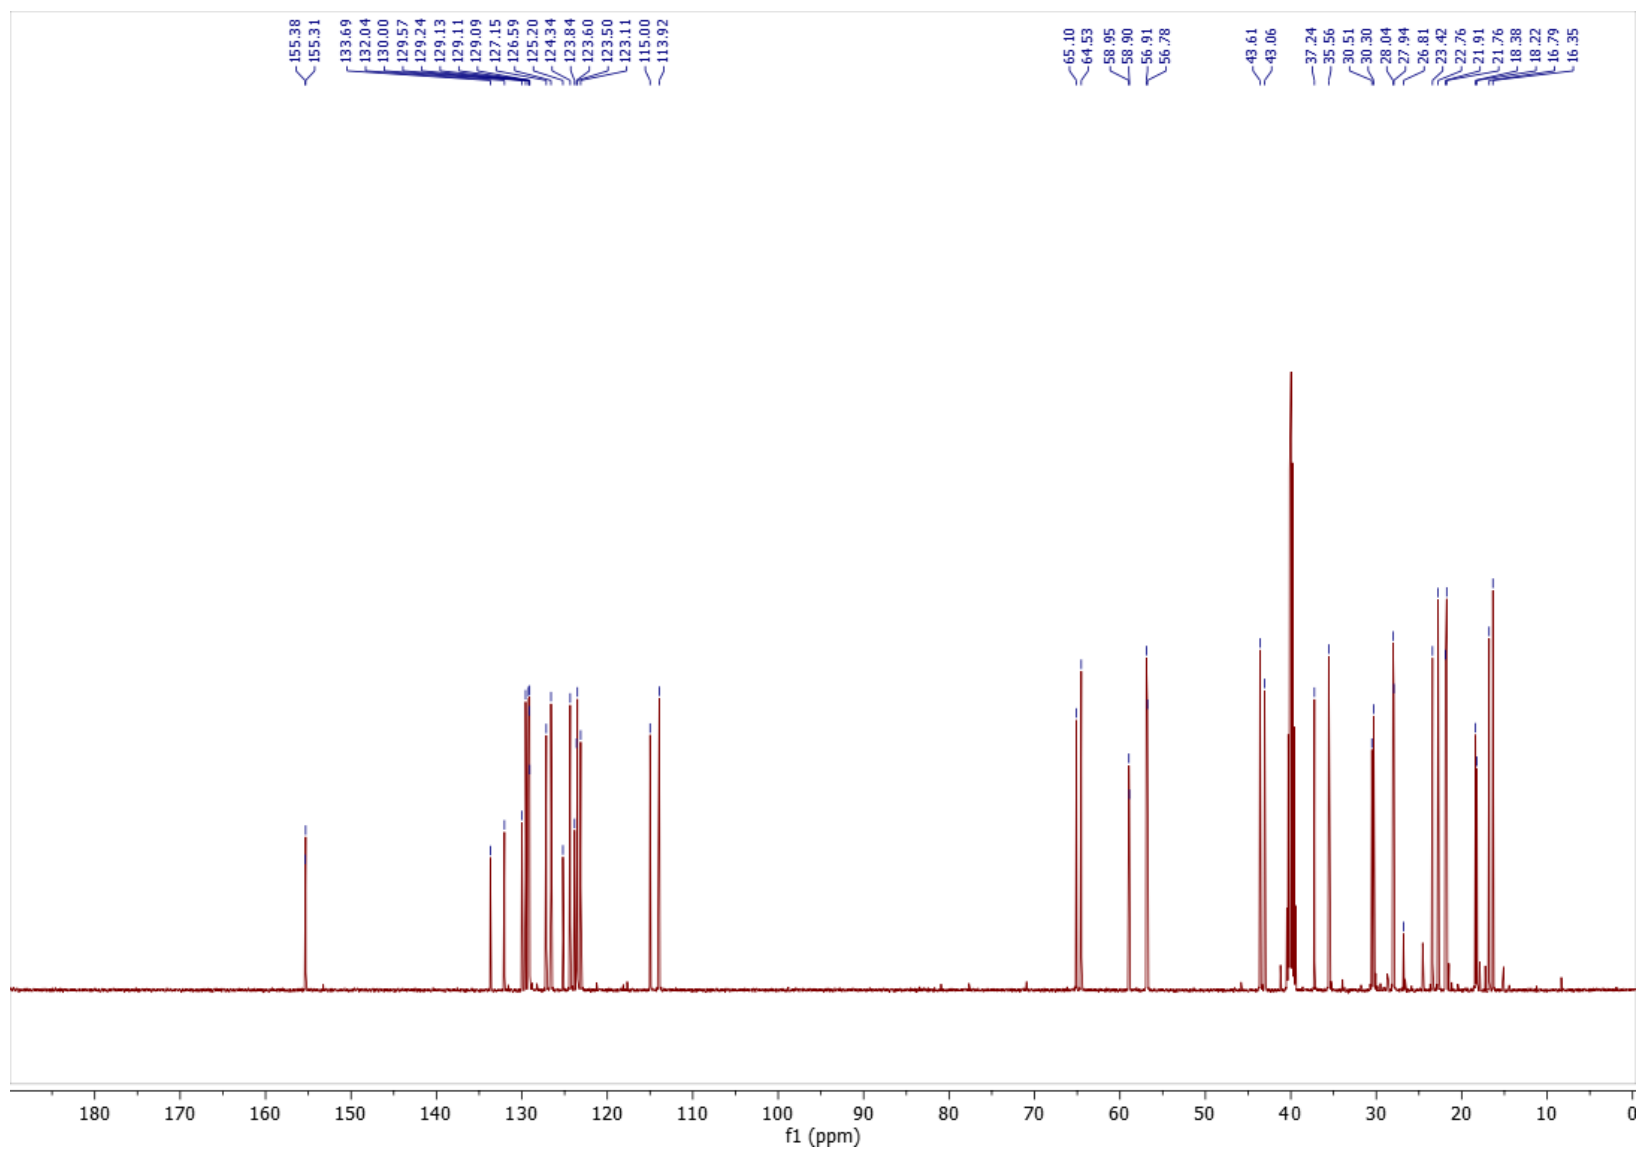

COSY spectrum of **3b** in DMSO-*d*<sub>6</sub> at 298 K

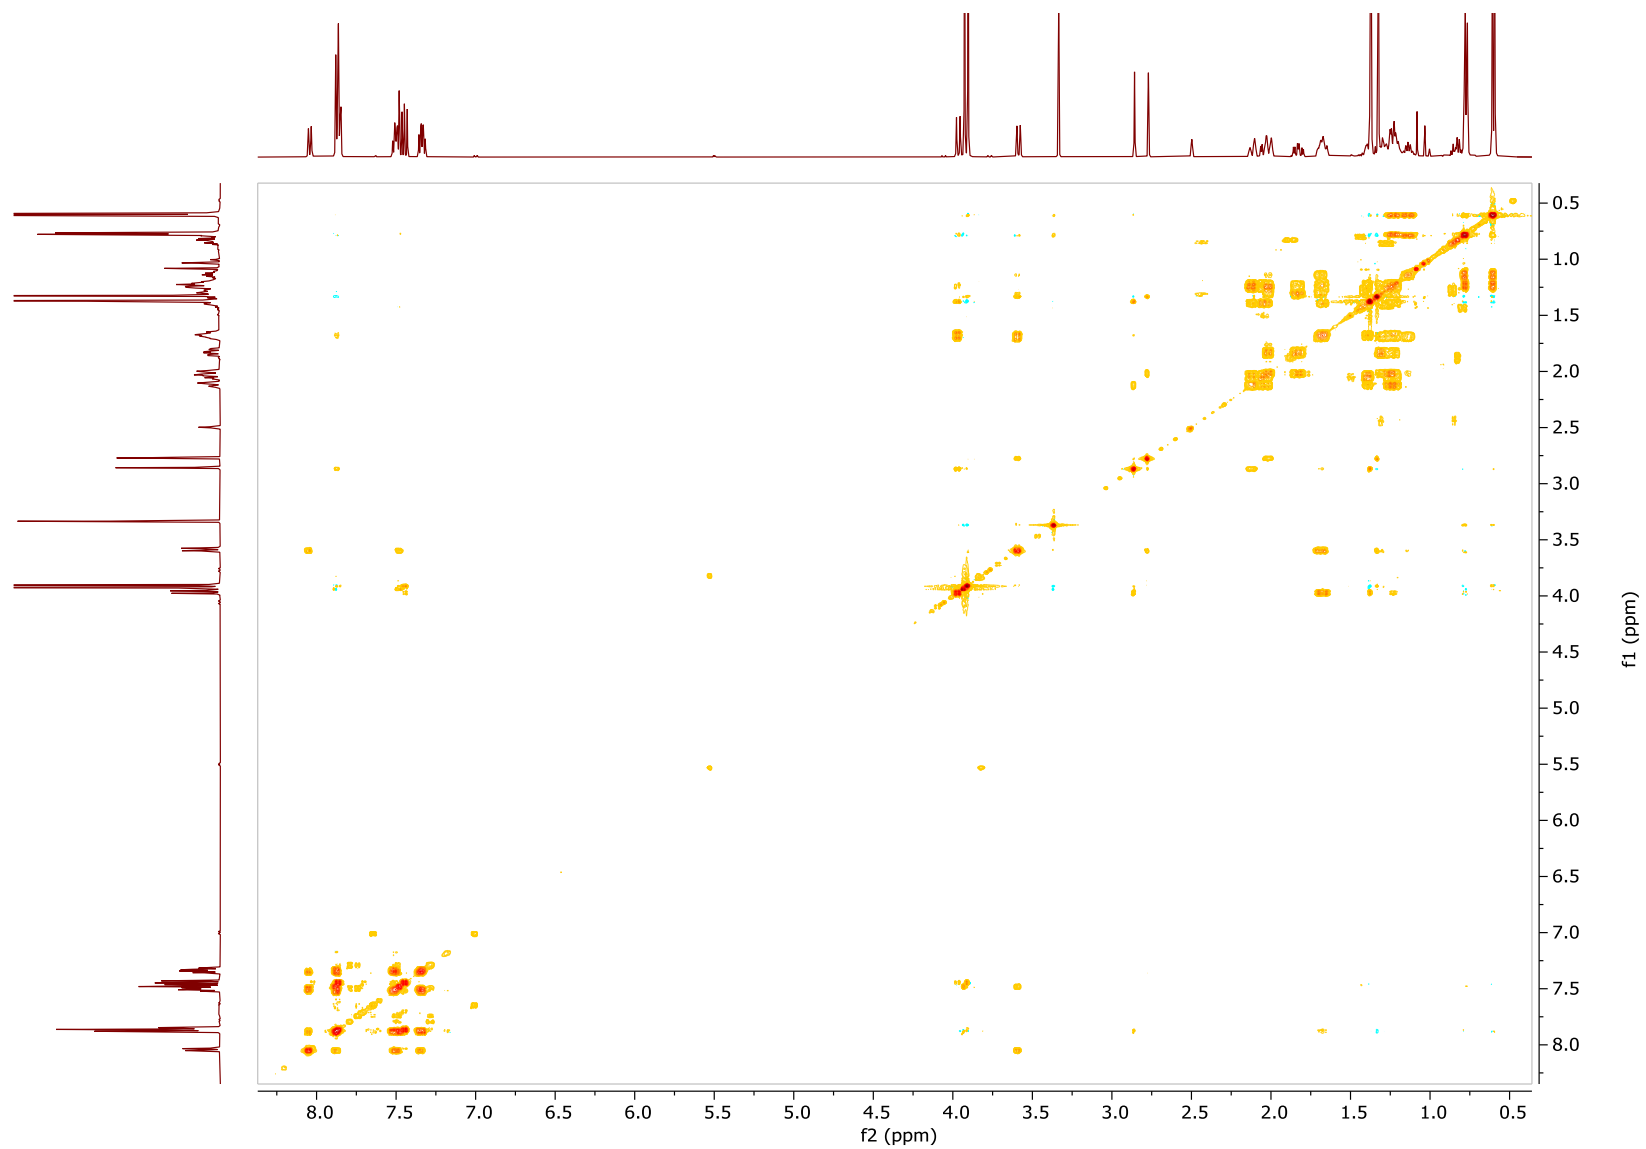

NOESY spectrum of **3b** in DMSO-*d*<sub>6</sub> at 298 K

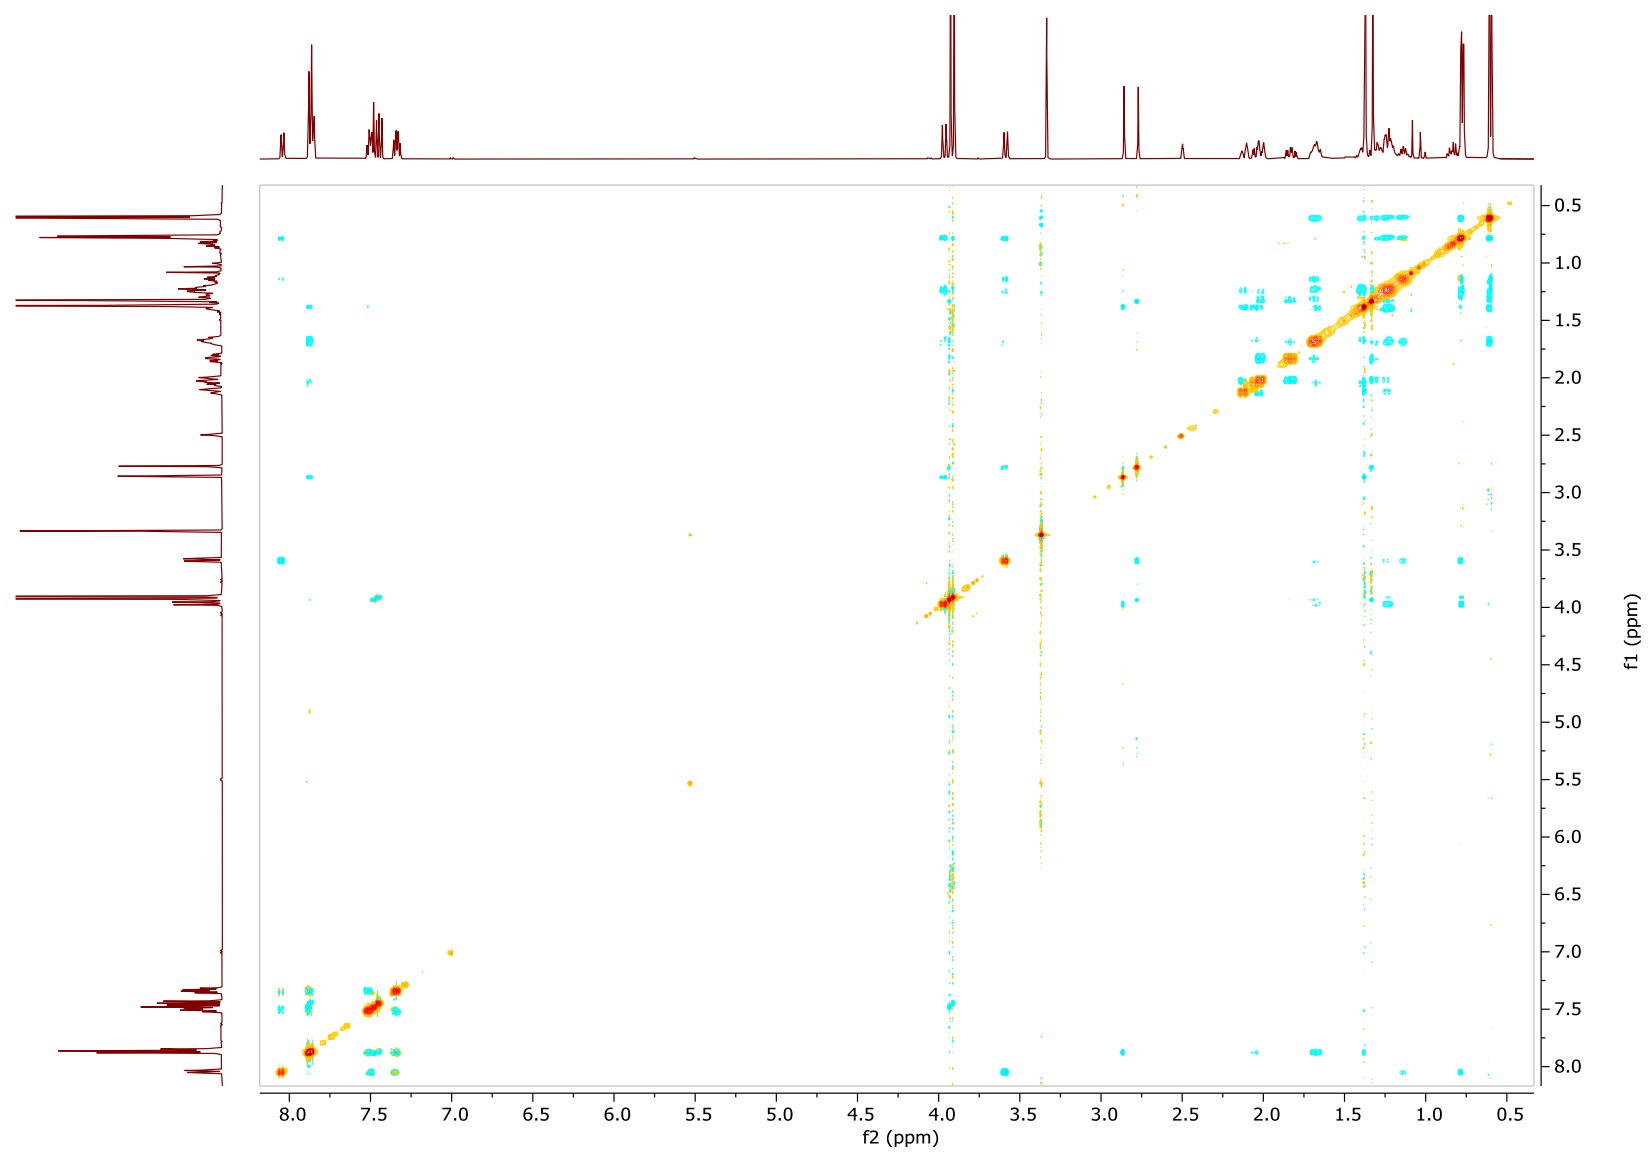

HSQC spectrum of **3b** in DMSO-*d*<sub>6</sub> at 298 K

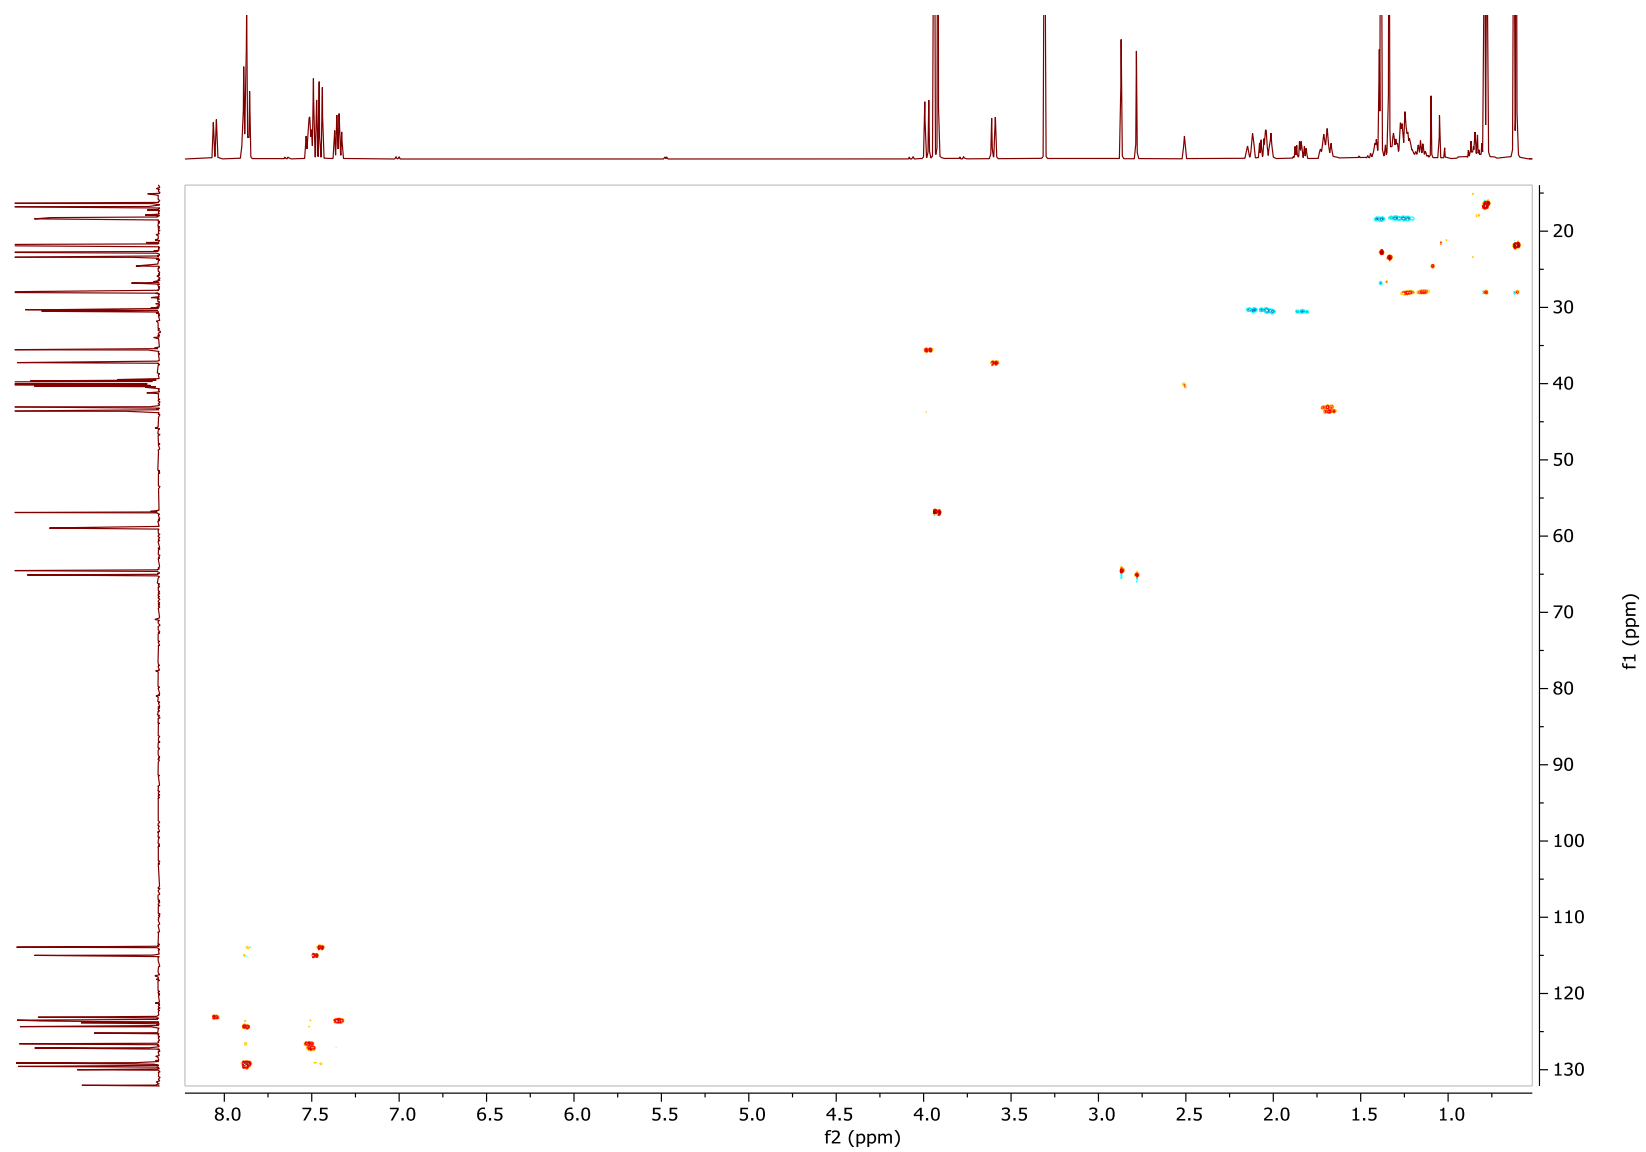

HMBC spectrum of **3b** in DMSO-*d*<sub>6</sub> at 298 K

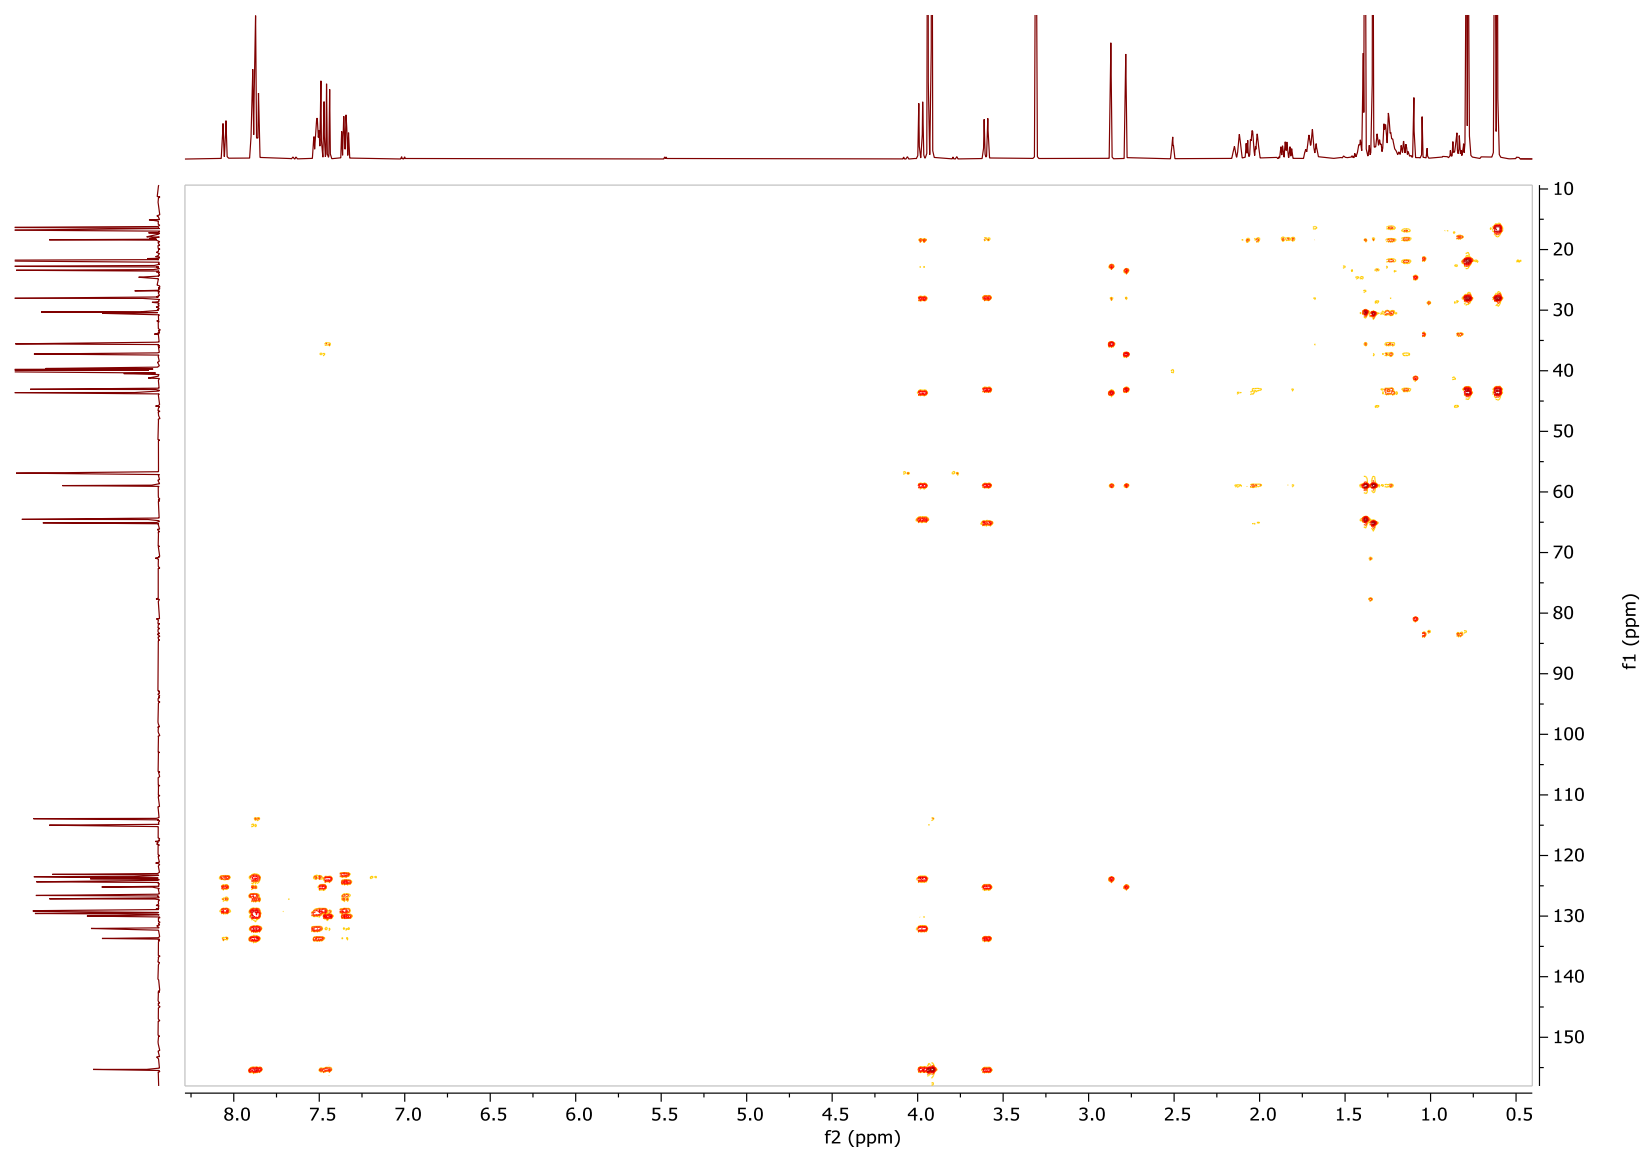

300 MHz  $^1\text{H}$  spectrum of **3c** in  $\text{CDCl}_3$  at 298 K

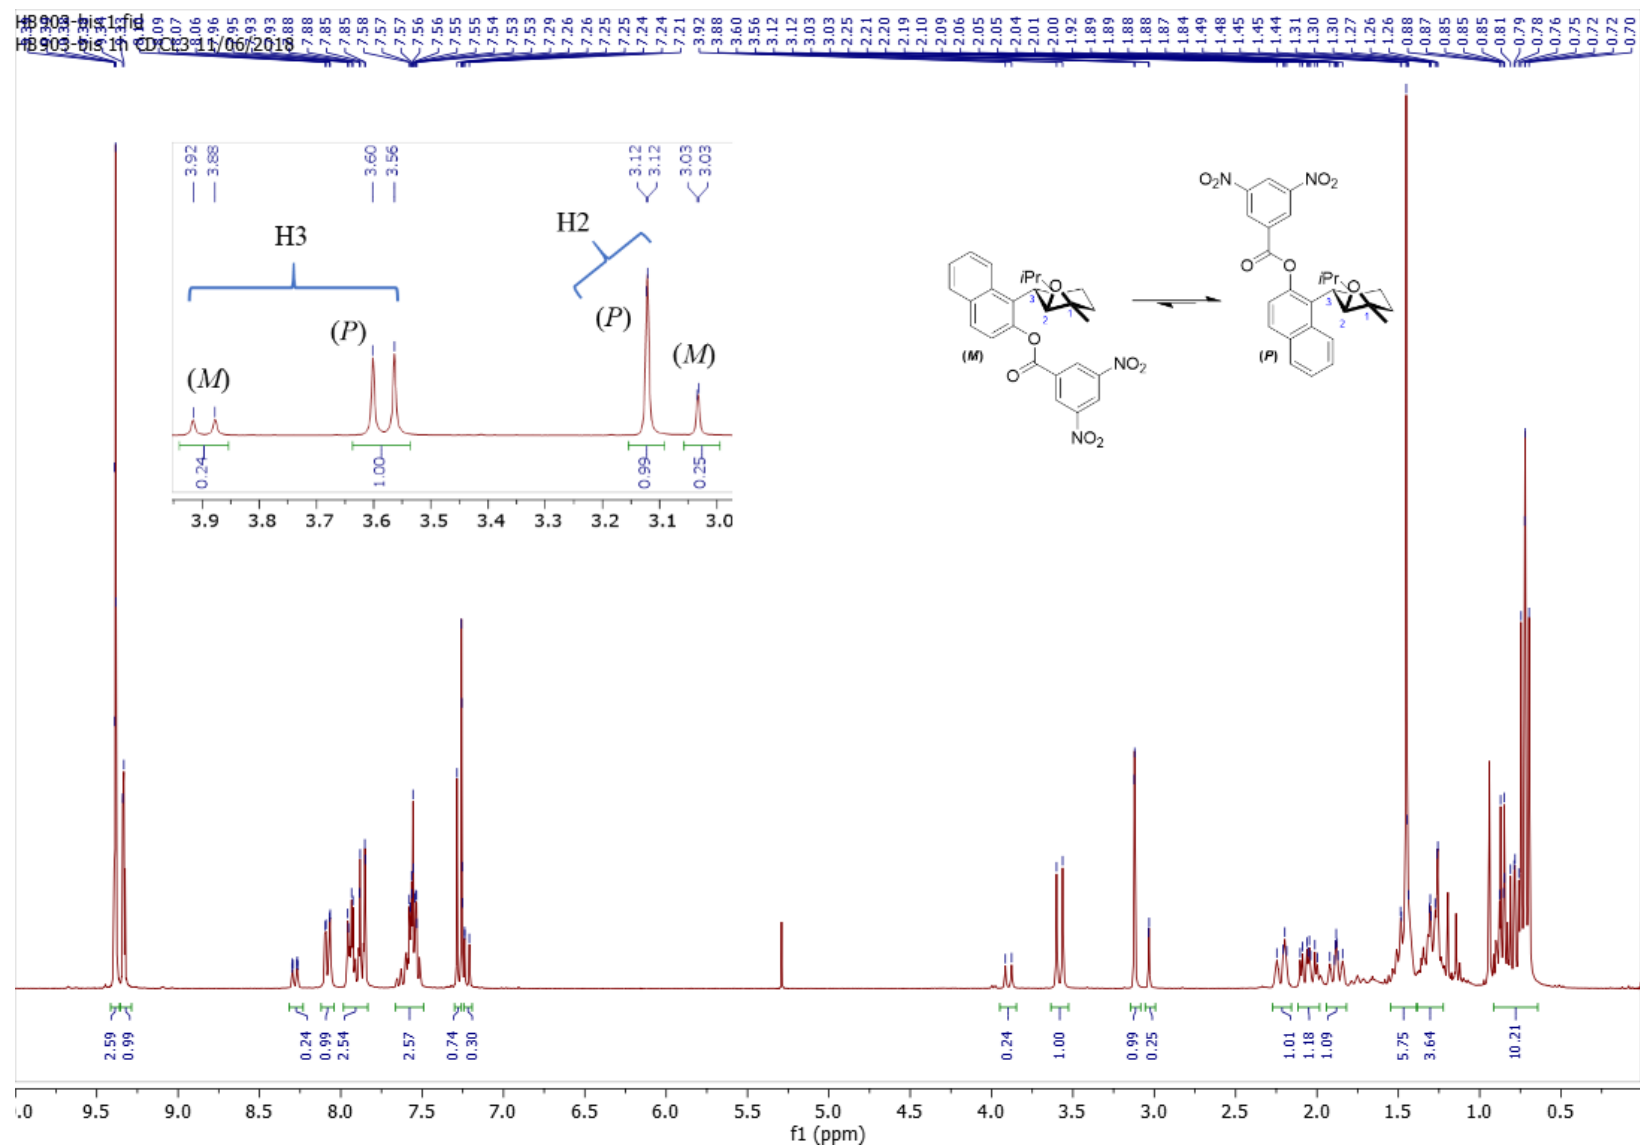

75 MHz  $^{13}\text{C}$  spectrum of **3c** in  $\text{CDCl}_3$  at 298 K

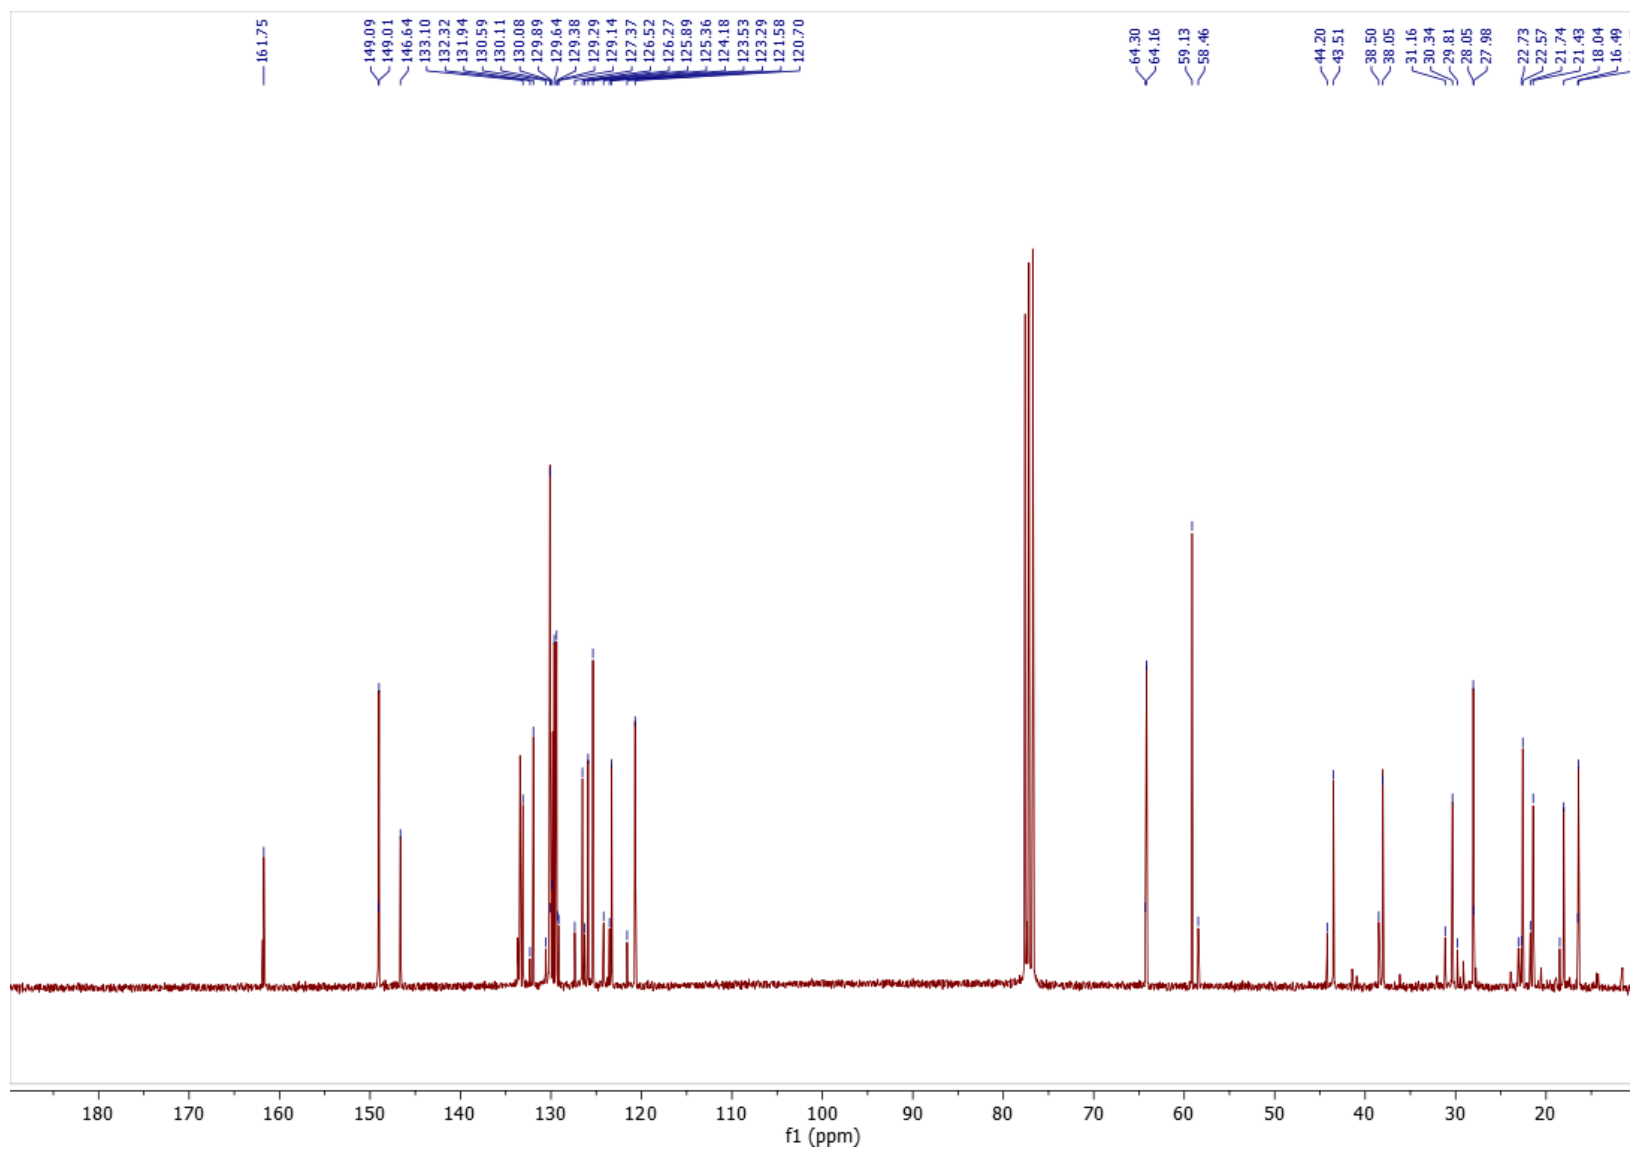

500 MHz  $^1\text{H}$  spectrum of **3c** in DMSO- $d_6$  at 298 K

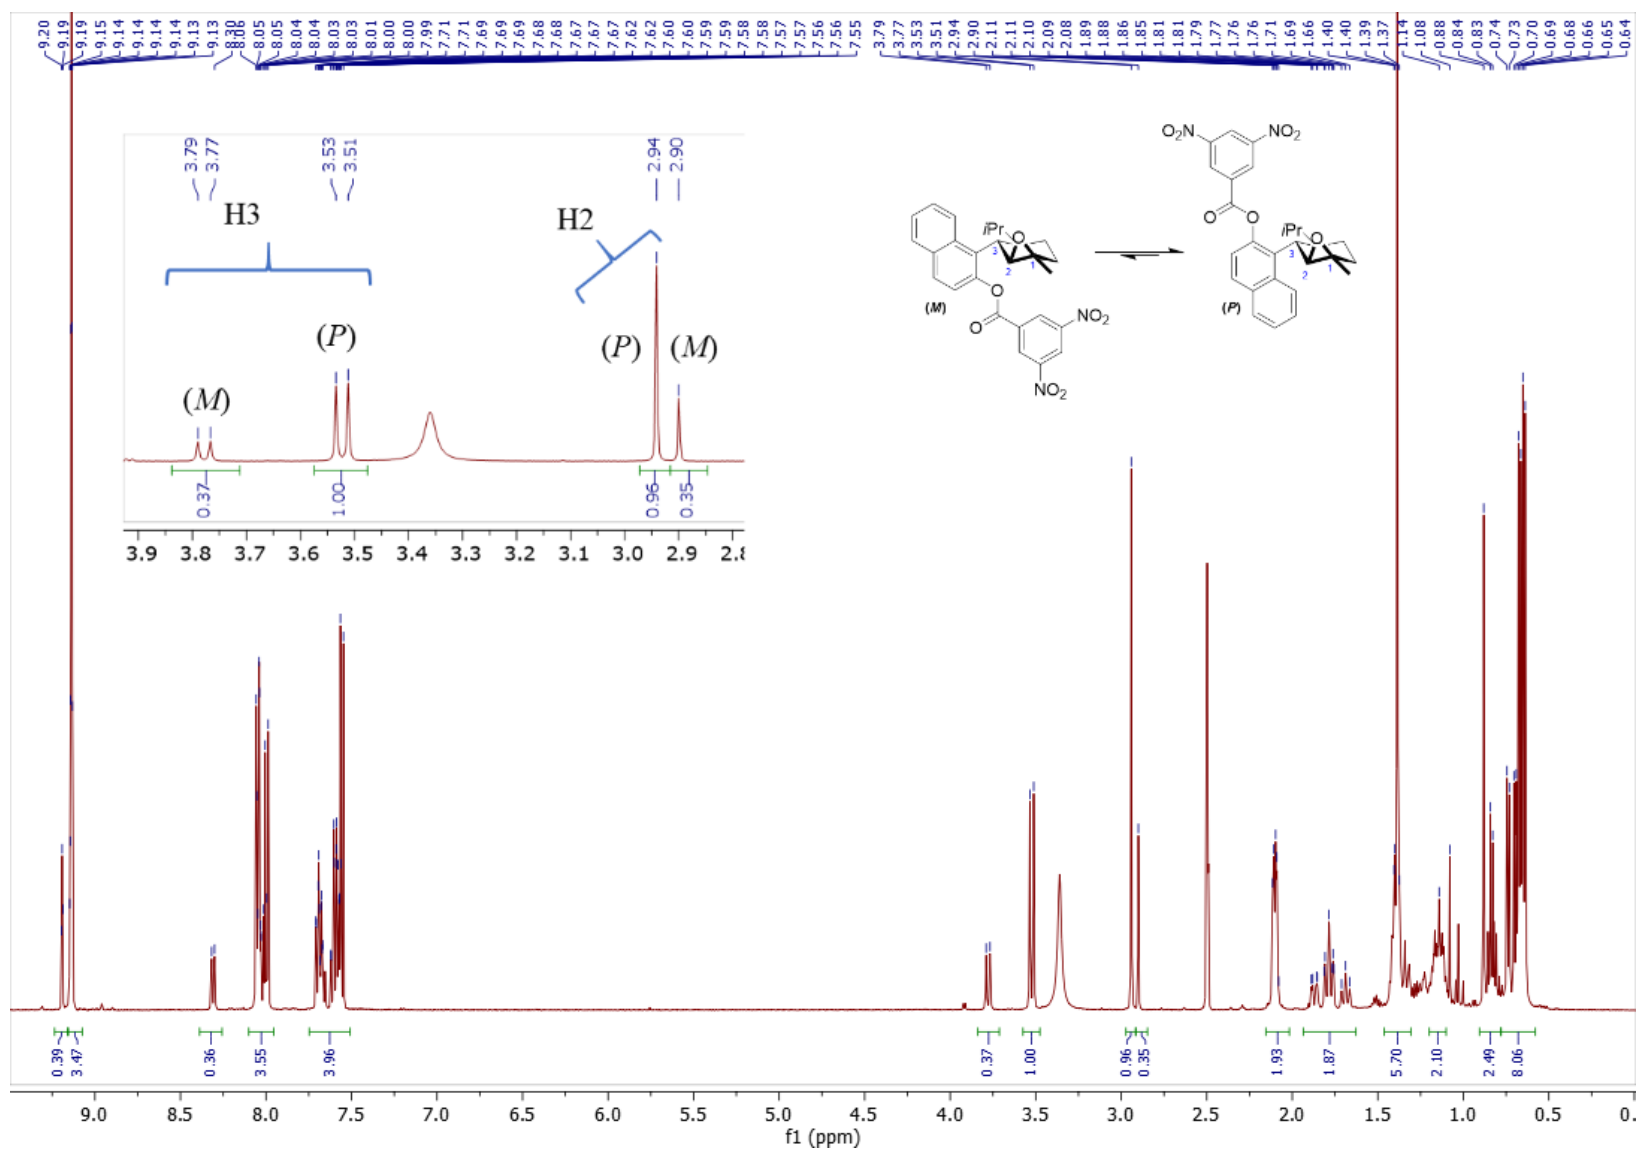



150 MHz  $^{13}\text{C}$  spectrum of **3c** in DMSO-*d*<sub>6</sub> at 298 K

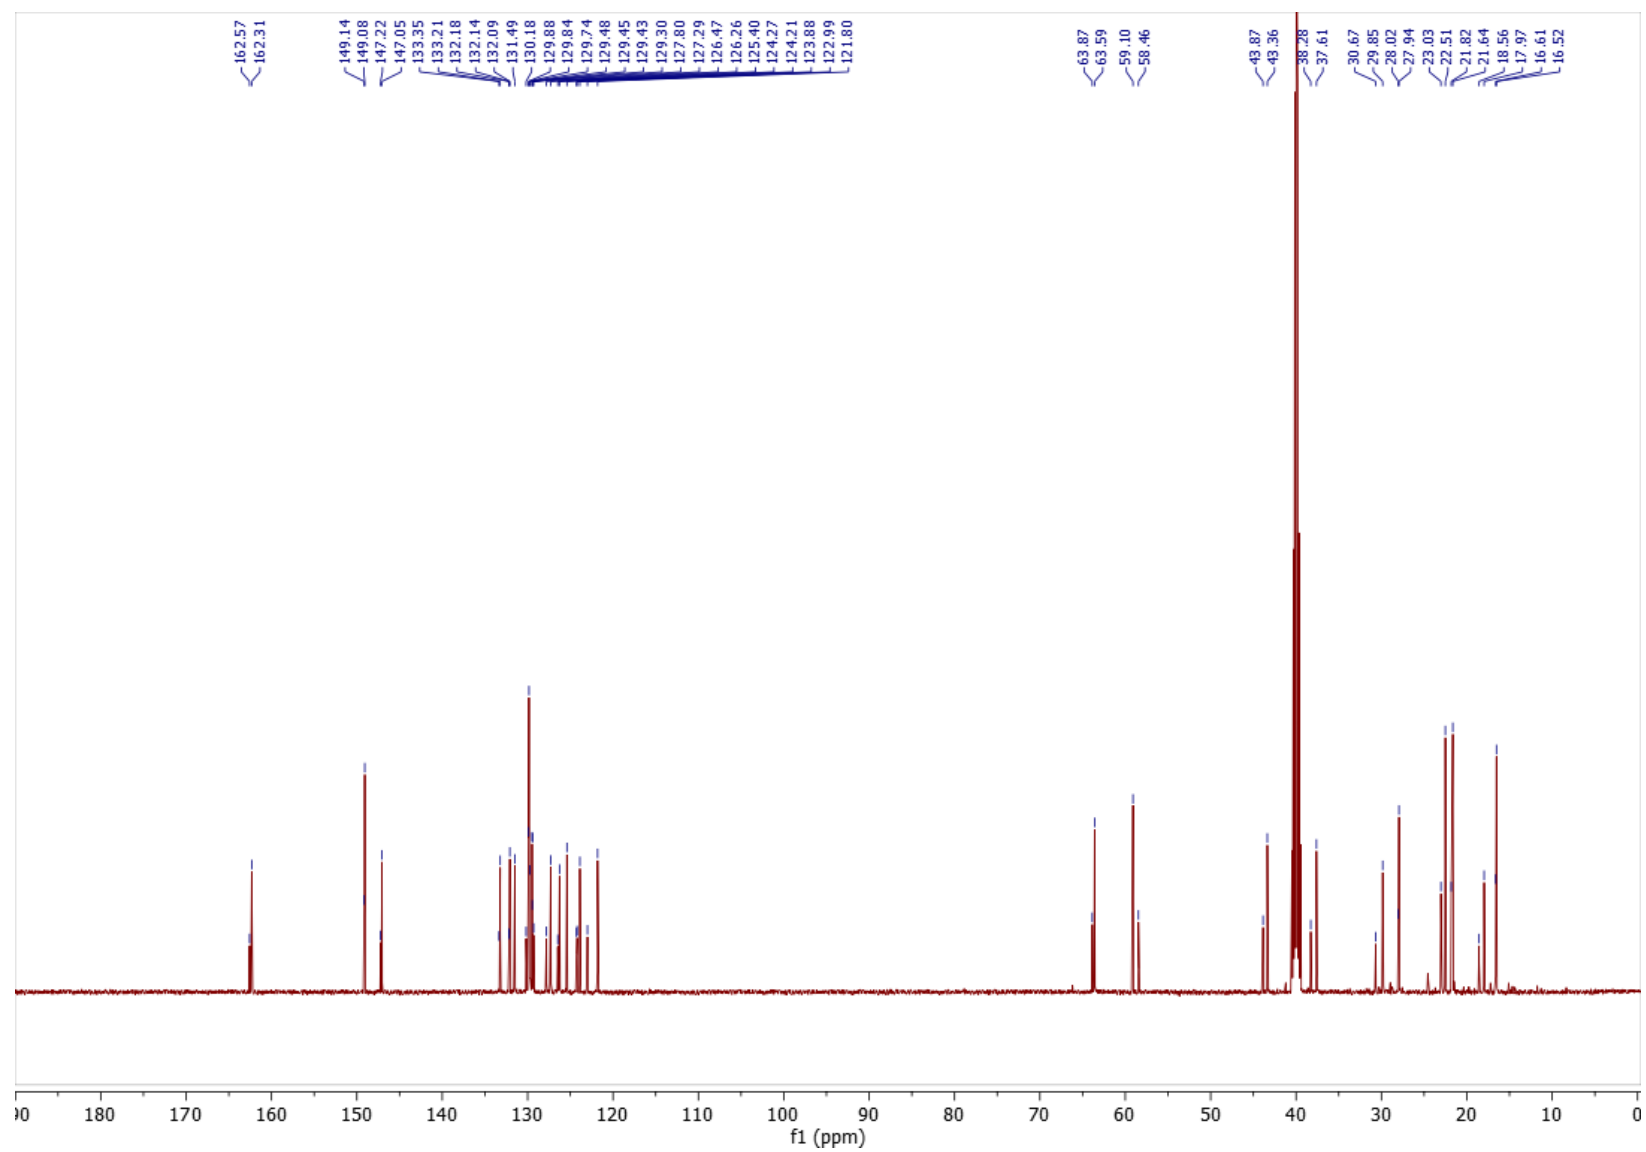

COSY spectrum of **3c** in DMSO-*d*<sub>6</sub> at 298 K

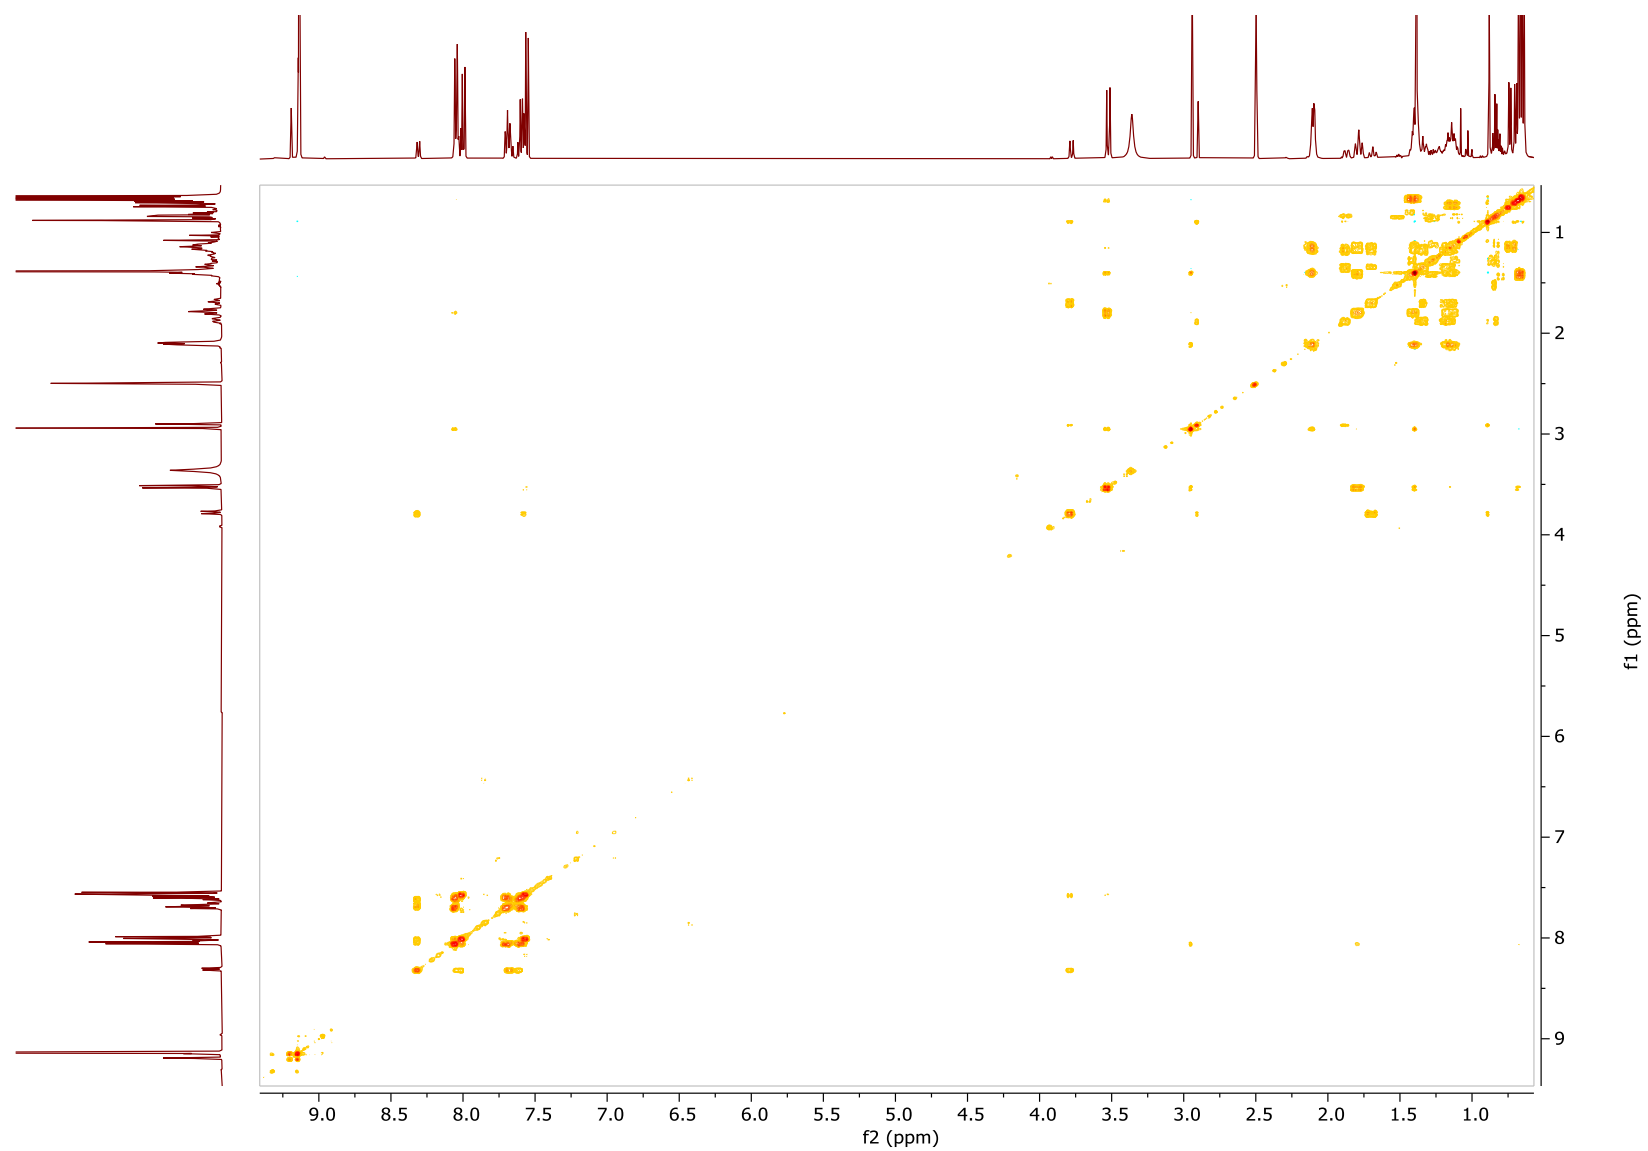

NOESY spectrum of **3c** in DMSO-*d*<sub>6</sub> at 298 K

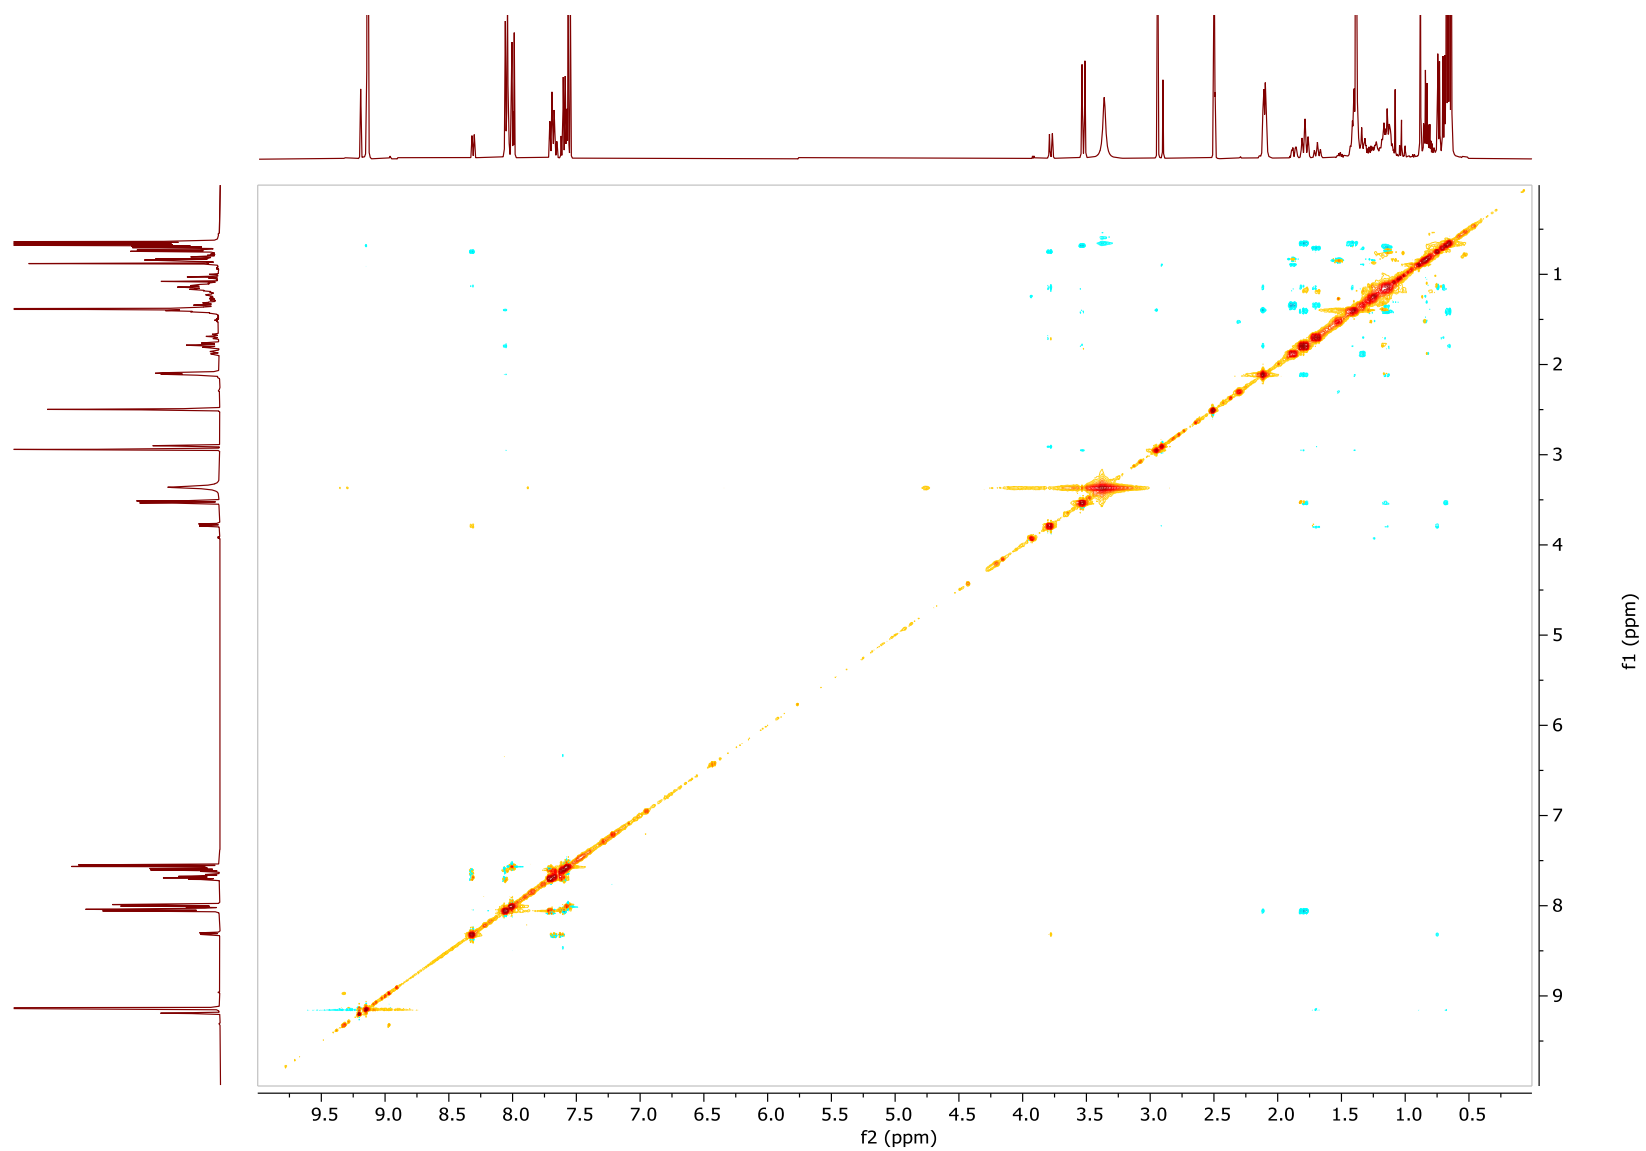

HSQC spectrum of **3c** in DMSO-*d*<sub>6</sub> at 298 K

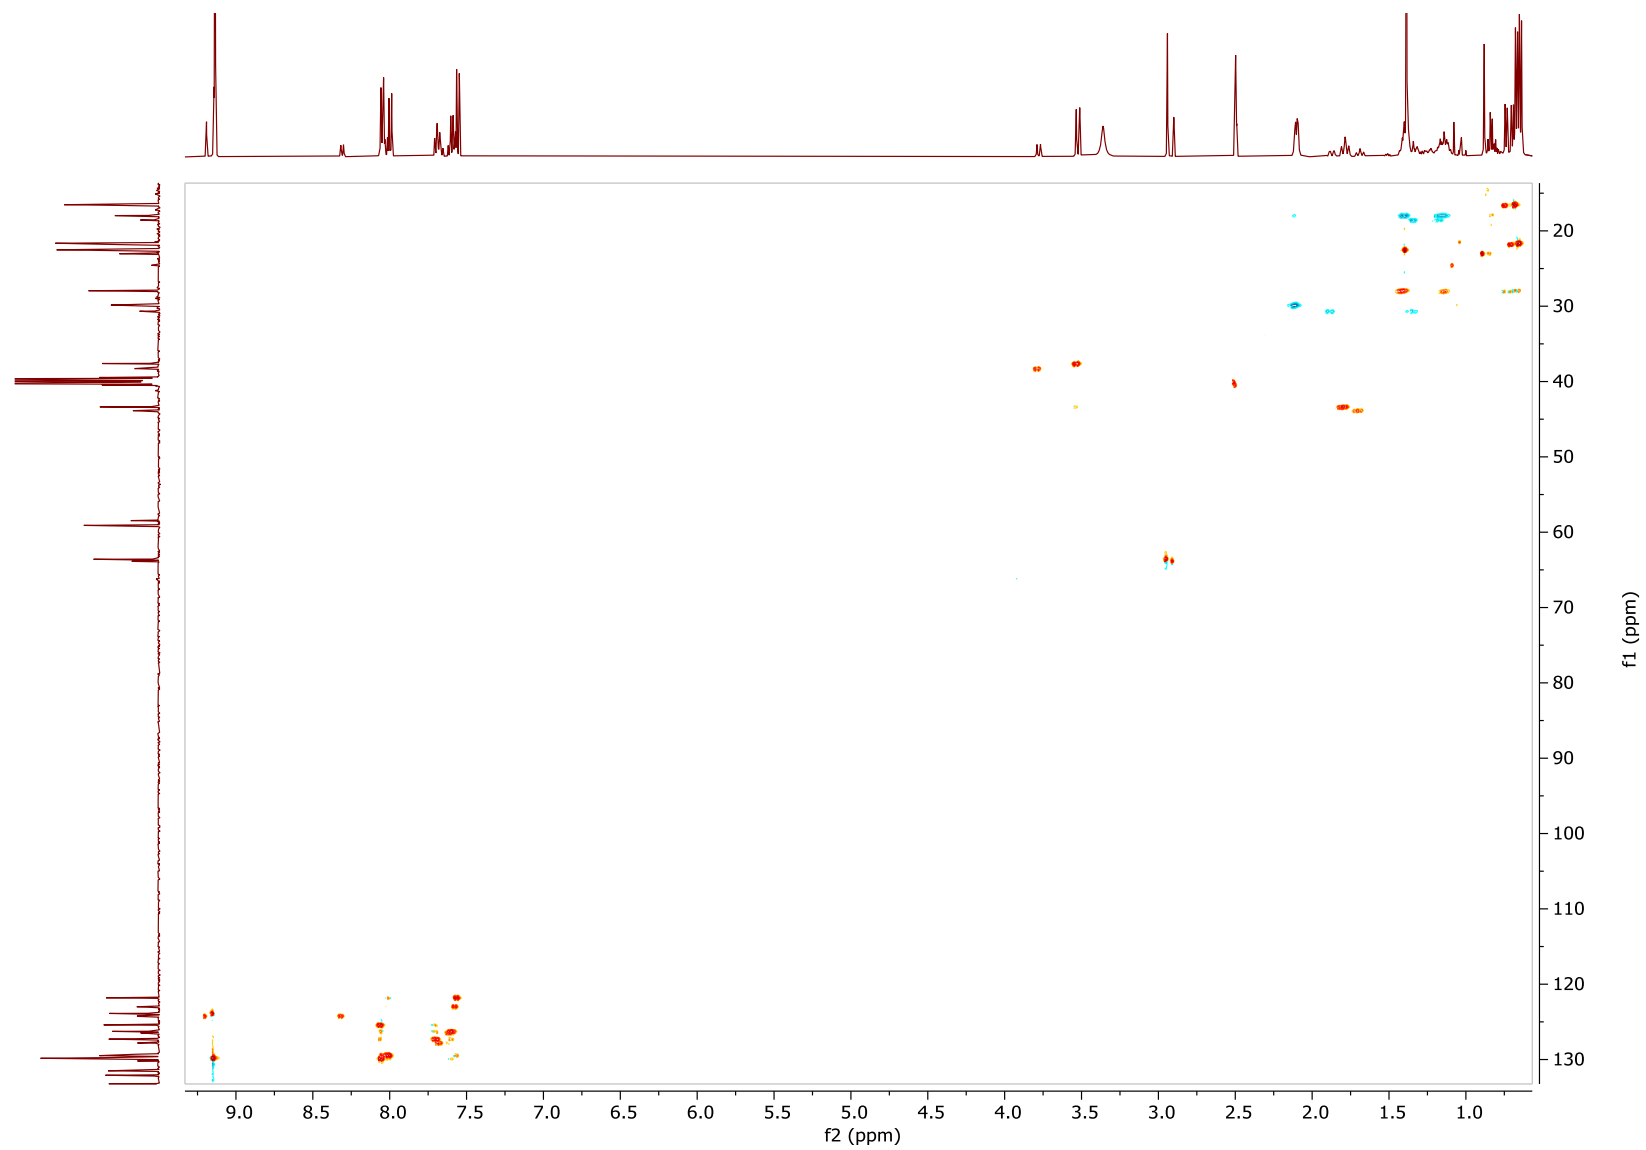

HMBC spectrum of **3c** in DMSO-*d*<sub>6</sub> at 298 K

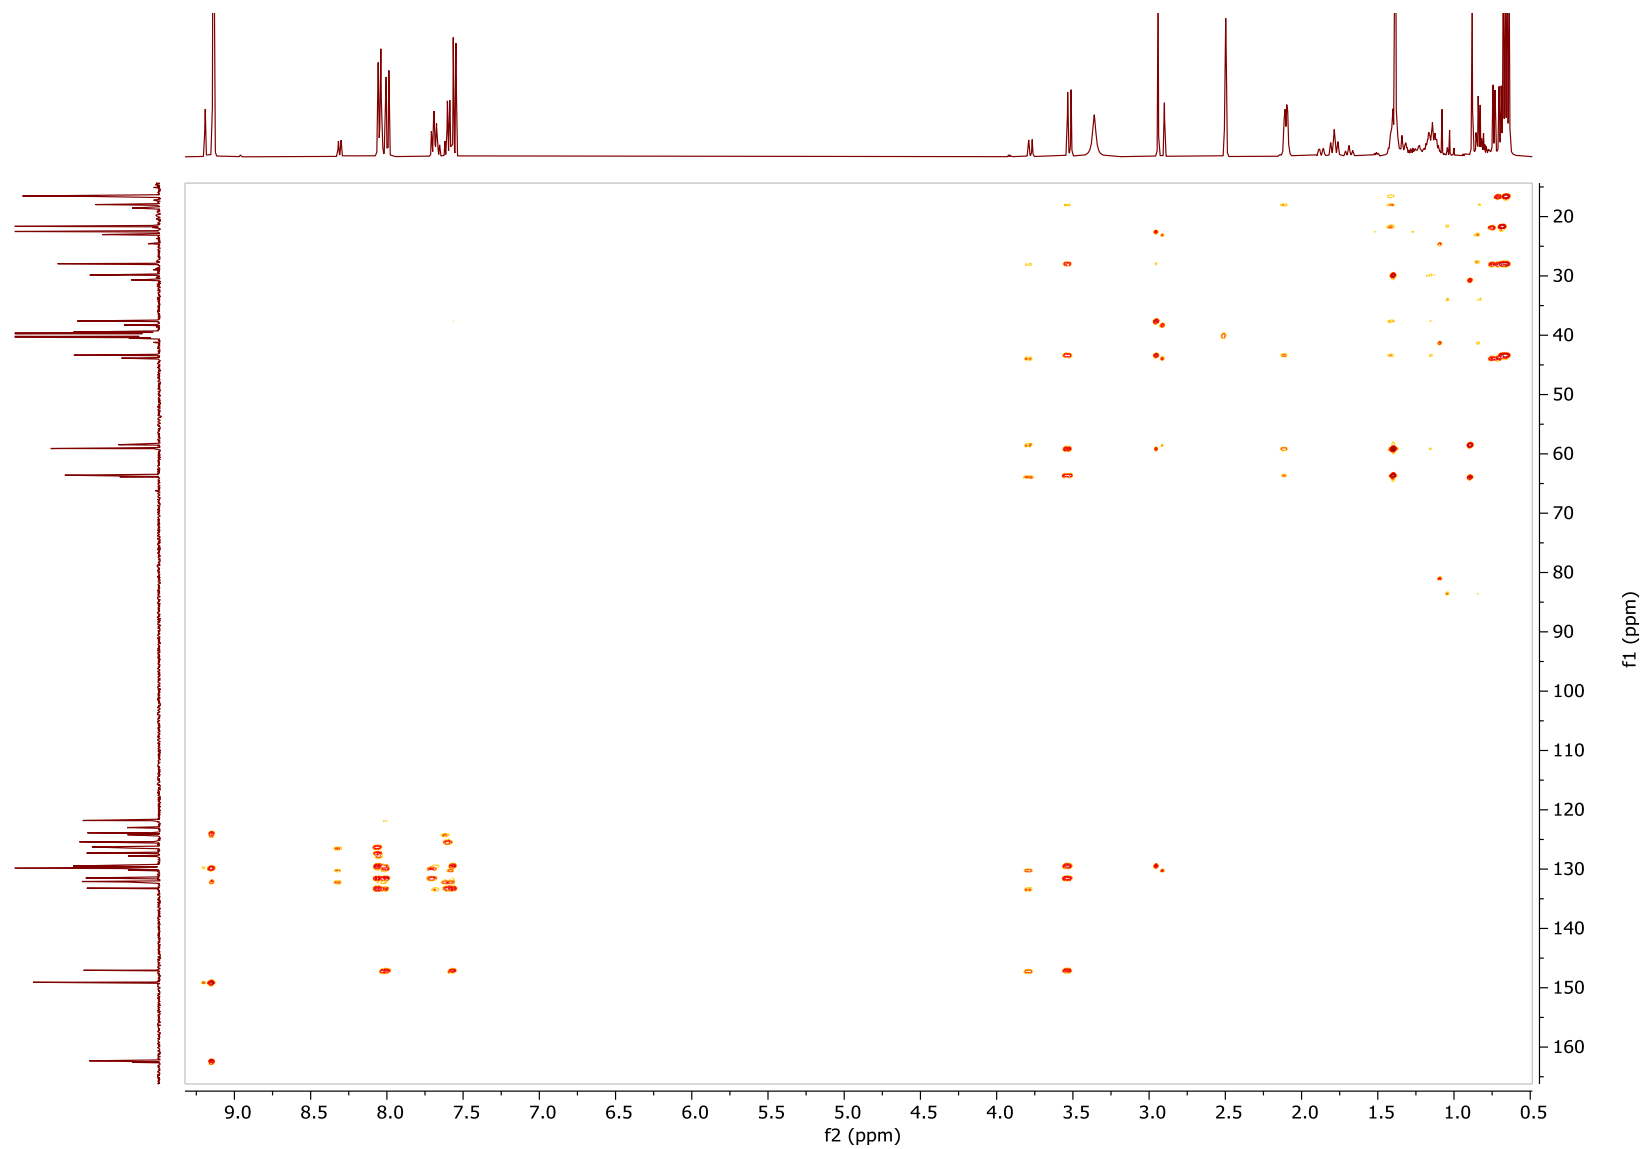

**Table S1.** Conformational Analysis Based on the  $^1\text{H}$  NMR and NOESY Spectra Data for Naphthylcyclohexanes **2a-c** at 298 K.

| <i>Sub.</i>              | <i>Solvent</i>    | <i>Ratio</i> <sup>[a]</sup> | $\delta_{\text{C3-H}}$ <sup>[b]</sup> (ppm) | $\Delta\delta$ <sup>[c]</sup> (ppm) |
|--------------------------|-------------------|-----------------------------|---------------------------------------------|-------------------------------------|
| <i>(M,P)</i> - <b>2a</b> | $\text{CDCl}_3$   | 25:75                       | 3.55, 3.42                                  | 0.13                                |
|                          | $\text{DMSO-}d_6$ | 28:72                       | 3.66, 3.30                                  | 0.36                                |
| <i>(M,P)</i> - <b>2b</b> | $\text{CDCl}_3$   | 30:70                       | 3.81, 3.38                                  | 0.43                                |
|                          | $\text{DMSO-}d_6$ | 28:72                       | 3.68, 3.29                                  | 0.39                                |
| <i>(M,P)</i> - <b>2c</b> | $\text{CDCl}_3$   | 25:75                       | 3.24, 3.58                                  | 0.34                                |
|                          | $\text{DMSO-}d_6$ | 27:73                       | 3.27, 3.62                                  | 0.35                                |

[a] Ratio of conformers. [b] C3-H chemical shift of conformers. [c] Chemical shift variation between conformers.

**Table S2.** Conformational Analysis Based on the  $^1\text{H}$  NMR and NOESY Spectra Data for Naphthylcyclohexene oxides **3b,c** at 298 K.

| <i>Sub.</i>              | <i>Solvent</i>    | <i>Ratio</i> <sup>[a]</sup> | $\delta_{\text{C3-H}}$ <sup>[b]</sup> (ppm) | $\Delta\delta$ <sup>[c]</sup> (ppm) |
|--------------------------|-------------------|-----------------------------|---------------------------------------------|-------------------------------------|
| <i>(M,P)</i> - <b>3b</b> | $\text{CDCl}_3$   | 45:55                       | 3.74, 4.15                                  | 0.41                                |
|                          | $\text{DMSO-}d_6$ | 45:55                       | 3.59, 3.97                                  | 0.38                                |
| <i>(M,P)</i> - <b>3c</b> | $\text{CDCl}_3$   | 20:80                       | 3.90, 3.58                                  | 0.32                                |
|                          | $\text{DMSO-}d_6$ | 25:75                       | 3.79, 3.53                                  | 0.26                                |

[a] Ratio of conformers. [b] C3-H chemical shift of conformers. [c] Chemical shift variation between conformers.

### VT-NMR Experiments and Determination of Activation/Kinetic Parameters:

VT- 2D EXSY:

EXSY spectra of naphthylcyclohexanes **2a-c** and naphthylcyclohexene oxides **3b,c** in DMSO-*d*<sub>6</sub> were implemented on a Bruker AVIII500 spectrometer. All data matrixes were recorded in States-TPPI mode using the Bruker pulse sequence noesygpqh; their size was 2k × 128 with 4 scans per FID, a 10s relaxation delay and mixing times of 10 and 200 ms were used in the temperature range of 353-393 K for **2a**, 353-413 K for **2b**, 363-423 K for **2c** and 373-423 K for **2'c** (recalculated), and 343-373 K for **3b,c**. For a given temperature *T*, exchange rate constants *k* were determined from a single spectrum in which the crosspeaks had 5-10% of the intensity of the diagonal peaks using the program EXSYCalc.<sup>[3]</sup>

[3] J. C. Cobas, M. Martin-Pastor, *EXSYCalc Version 1.0*, Mestrelab Research.

EXSY determined rates were directly fitted using the Eyring equation:

$$k = \frac{k_B \cdot T}{h} \cdot e^{(-\Delta G^\ddagger / R \cdot T)}$$

with *R*, *k<sub>B</sub>* and *h* are gas, Boltzmann's, and Planck's constants, respectively.

$\Delta G^\ddagger$  was calculated at 298.15 K using  $\Delta G^\ddagger = \Delta H^\ddagger - T\Delta S^\ddagger$

*k* was calculated at 298.15 K using  $k = (k_B T/h) e^{-\Delta G^\ddagger / RT}$

*t*<sub>1/2</sub> was calculated at 298.15 K using  $t_{1/2} = \ln 2/k$

**Table S3.** Rotational Barrier Data for **2a** in DMSO-*d*<sub>6</sub>: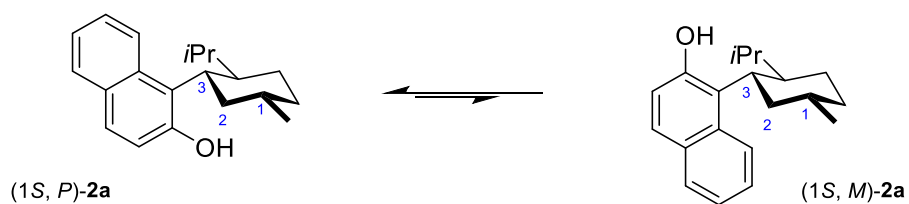

| <i>T</i> (K) | $k_{(M) \rightarrow (P)}$ (s <sup>-1</sup> ) | $k_{(P) \rightarrow (M)}$ (s <sup>-1</sup> ) |
|--------------|----------------------------------------------|----------------------------------------------|
| 353          | 0.130                                        | 0.053                                        |
| 363          | 0.284                                        | 0.116                                        |
| 373          | 0.606                                        | 0.258                                        |
| 383          | 1.237                                        | 0.536                                        |
| 393          | 2.451                                        | 1.074                                        |

**Graph S1.** Eyring fitting of EXSY rates for **2a** in DMSO-*d*<sub>6</sub>: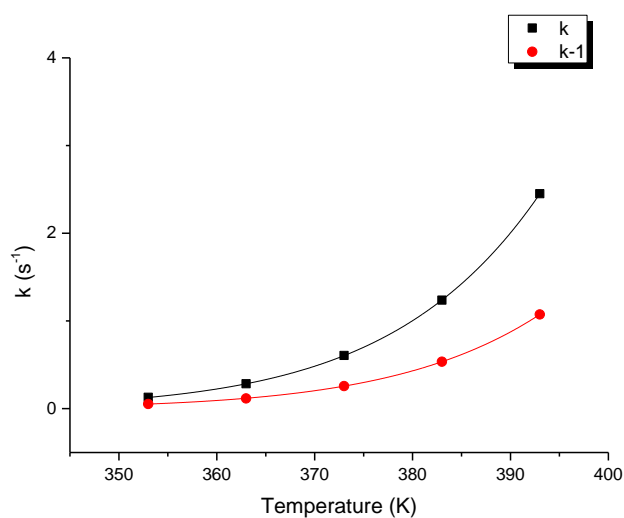

|                                | <i>(M)</i> → <i>(P)</i> |           | <i>(P)</i> → <i>(M)</i> |           |
|--------------------------------|-------------------------|-----------|-------------------------|-----------|
|                                | <i>Value</i>            | <i>SD</i> | <i>Value</i>            | <i>SD</i> |
| $\Delta G^\ddagger$ (kJ/mol)   | 91.30                   | 0.05      | 93.80                   | 0.09      |
| $\Delta H^\ddagger$ (kJ/mol)   | 82.08                   | 0.16      | 83.96                   | 0.32      |
| $\Delta S^\ddagger$ (J/mol.K)  | -30.92                  | 0.38      | -32.97                  | 0.75      |
| <i>Correlation coefficient</i> | 1                       |           | 0.99998                 |           |



**Table S4.** Rotational Barrier Data for **2b** in DMSO-*d*<sub>6</sub>: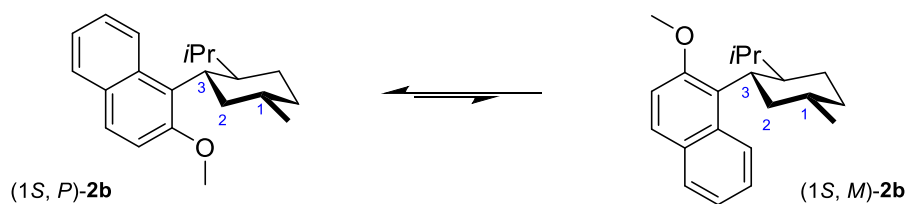

| <i>T</i> (K) | $k_{(M) \rightarrow (P)}$ (s <sup>-1</sup> ) | $k_{(P) \rightarrow (M)}$ (s <sup>-1</sup> ) |
|--------------|----------------------------------------------|----------------------------------------------|
| 353          | 0.120                                        | 0.038                                        |
| 363          | 0.252                                        | 0.109                                        |
| 373          | 0.540                                        | 0.229                                        |
| 383          | 1.104                                        | 0.506                                        |
| 393          | 2.197                                        | 1.016                                        |
| 403          | 4.084                                        | 1.764                                        |
| 413          | 6.596                                        | 2.938                                        |

**Graph S2.** Eyring fitting of EXSY rates for **2b** in DMSO-*d*<sub>6</sub>: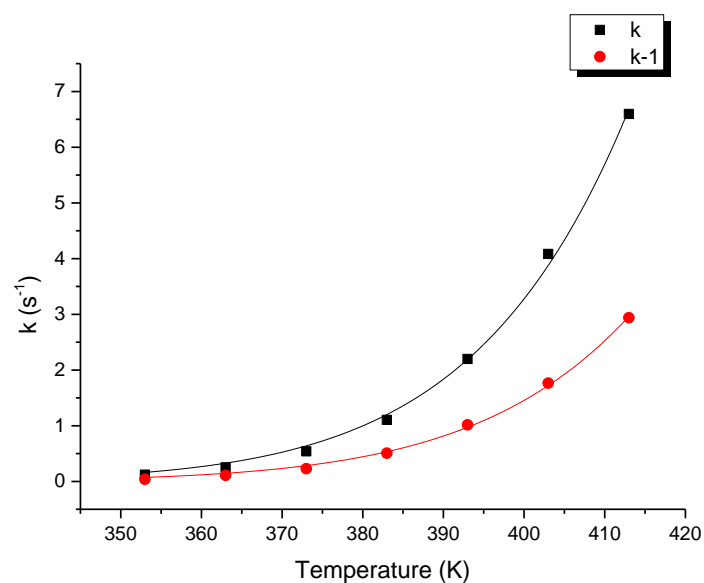

|                                | <i>(M)</i> → <i>(P)</i> |           | <i>(P)</i> → <i>(M)</i> |           |
|--------------------------------|-------------------------|-----------|-------------------------|-----------|
|                                | <i>Value</i>            | <i>SD</i> | <i>Value</i>            | <i>SD</i> |
| $\Delta G^\ddagger$ (kJ/mol)   | 89.13                   | 0.89      | 91.12                   | 0.76      |
| $\Delta H^\ddagger$ (kJ/mol)   | 71.95                   | 2.81      | 71.86                   | 2.36      |
| $\Delta S^\ddagger$ (J/mol.K)  | -57.63                  | 6.42      | -64.61                  | 5.39      |
| <i>Correlation coefficient</i> | 0.99736                 |           | 0.99812                 |           |

**Table S5.** Rotational Barrier Data for **2c** in DMSO-*d*<sub>6</sub>:

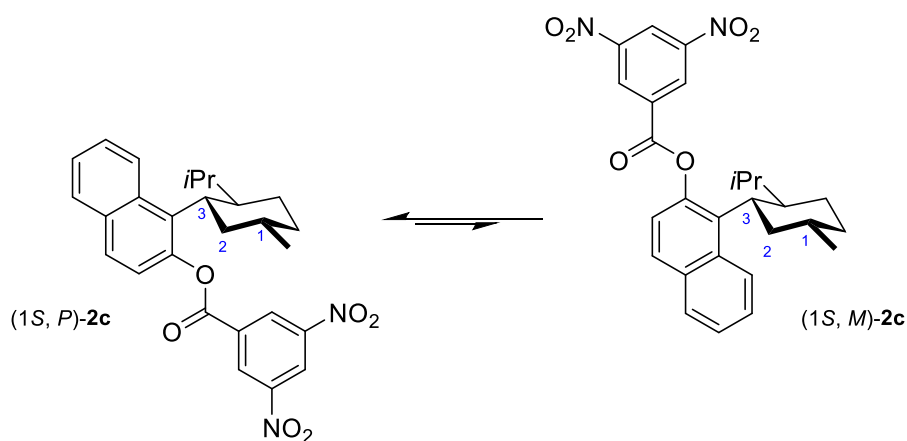

| <i>T</i> (K) | $k_{(M) \rightarrow (P)}$ (s <sup>-1</sup> ) | $k_{(P) \rightarrow (M)}$ (s <sup>-1</sup> ) |
|--------------|----------------------------------------------|----------------------------------------------|
| 363          | 0.092                                        | 0.035                                        |
| 373          | 0.205                                        | 0.080                                        |
| 383          | 0.452                                        | 0.164                                        |
| 393          | 0.865                                        | 0.347                                        |
| 403          | 1.648                                        | 0.623                                        |
| 413          | 2.581                                        | 1.036                                        |
| 423          | 4.716                                        | 1.877                                        |

**Graph S3.** Eyring fitting of EXSY rates for **2c** in DMSO-*d*<sub>6</sub>:

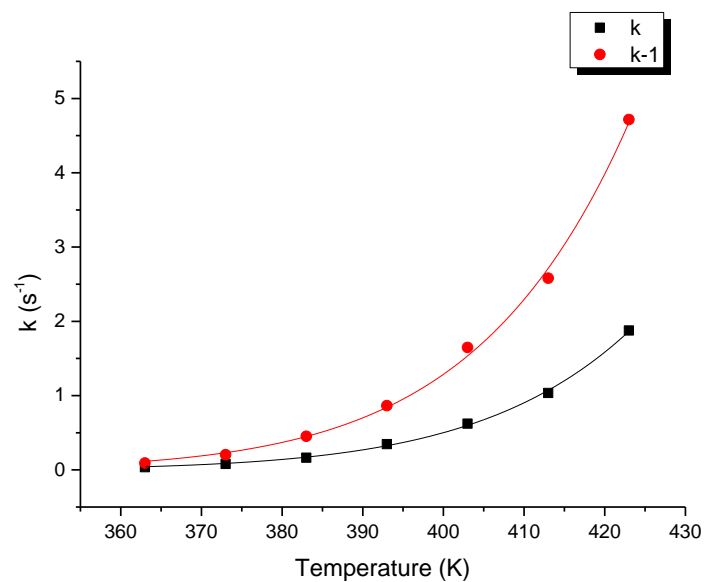

|                                | <i>(M) → (P)</i> |           | <i>(P) → (M)</i> |           |
|--------------------------------|------------------|-----------|------------------|-----------|
|                                | <i>Value</i>     | <i>SD</i> | <i>Value</i>     | <i>SD</i> |
| $\Delta G^\ddagger$ (kJ/mol)   | 92.36            | 0.94      | 95.08            | 0.67      |
| $\Delta H^\ddagger$ (kJ/mol)   | 75.53            | 2.80      | 77.02            | 1.99      |
| $\Delta S^\ddagger$ (J/mol.K)  | -56.45           | 6.24      | -60.57           | 4.43      |
| <i>Correlation coefficient</i> | 0.99756          |           | 0.99883          |           |

**Table S6.** Rotational Barrier Data for **2'c** in DMSO-*d*<sub>6</sub>:

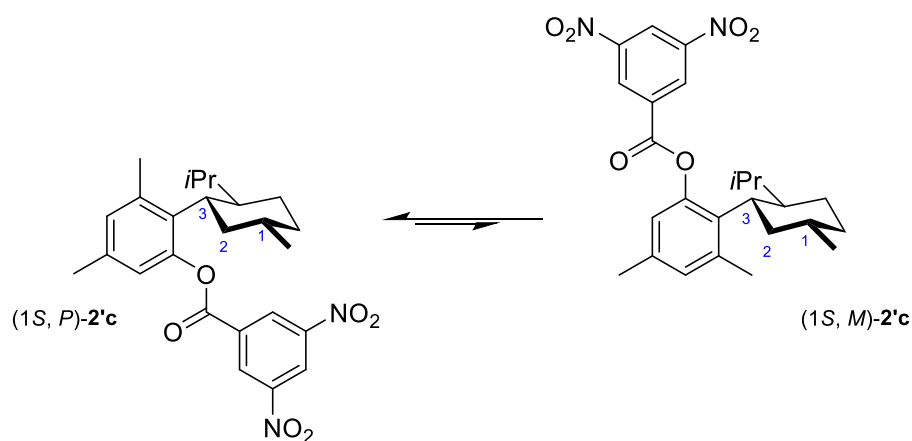

| <i>T</i> (K) | $k_{(M) \rightarrow (P)}$ (s <sup>-1</sup> ) | $k_{(P) \rightarrow (M)}$ (s <sup>-1</sup> ) |
|--------------|----------------------------------------------|----------------------------------------------|
| 373          | 0.556                                        | 0.150                                        |
| 393          | 1.096                                        | 0.265                                        |
| 393          | 2.114                                        | 0.557                                        |
| 403          | 3.602                                        | 1.055                                        |
| 413          | 5.411                                        | 1.750                                        |
| 423          | 10.035                                       | 2.640                                        |

**Graph S4.** Eyring fitting of EXSY rates for **2'c** in DMSO-*d*<sub>6</sub>:

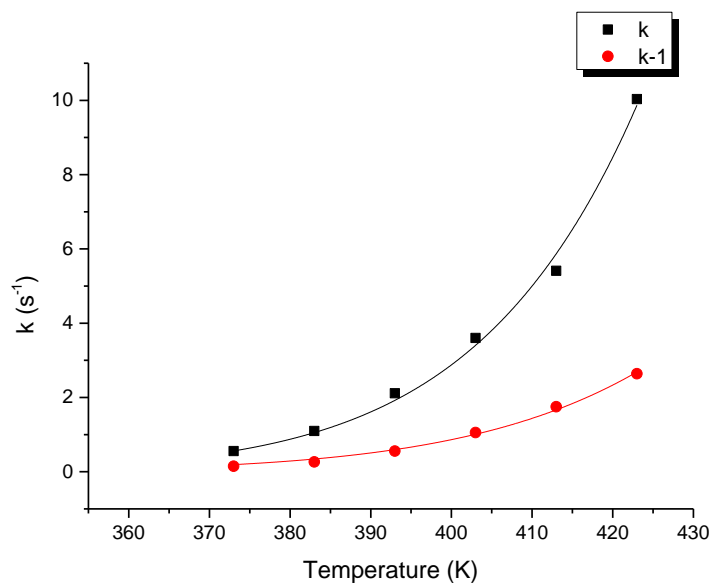

|                                | <i>(M) → (P)</i> |           | <i>(P) → (M)</i> |           |
|--------------------------------|------------------|-----------|------------------|-----------|
|                                | <i>Value</i>     | <i>SD</i> | <i>Value</i>     | <i>SD</i> |
| $\Delta G^\ddagger$ (kJ/mol)   | 89.46            | 1.44      | 90.91            | 1.22      |
| $\Delta H^\ddagger$ (kJ/mol)   | 71.97            | 4.31      | 65.97            | 3.64      |
| $\Delta S^\ddagger$ (J/mol.K)  | -58.64           | 9.63      | -83.66           | 8.13      |
| <i>Correlation coefficient</i> | 0.99365          |           | 0.99446          |           |

**Table S7.** Activation and Kinetic Parameters of Naphthylcyclohexane **2a-c** conformers in DMSO-*d*6 at 298 K.

|           | <i>Sub.</i>               | <i>k</i> ( <i>ms</i> <sup>-1</sup> ) | $\Delta G^\ddagger$ ( <i>kJ/mol</i> ) | $\Delta H^\ddagger$ ( <i>kJ/mol</i> ) | $\Delta S^\ddagger$ ( <i>J/mol.K</i> ) | <i>t</i> <sub>1/2</sub> ( <i>s</i> ) |
|-----------|---------------------------|--------------------------------------|---------------------------------------|---------------------------------------|----------------------------------------|--------------------------------------|
| <b>2a</b> | ( <i>M</i> )→( <i>P</i> ) | 0.63                                 | 91.30 ± 0.05                          | 82.08 ± 0.16                          | -30.92 ± 0.38                          | 1097.13                              |
|           | ( <i>P</i> )→( <i>M</i> ) | 0.23                                 | 93.80 ± 0.09                          | 83.96 ± 0.32                          | -32.97 ± 0.75                          | 3006.42                              |
| <b>2b</b> | ( <i>M</i> )→( <i>P</i> ) | 1.51                                 | 89.13 ± 0.89                          | 71.95 ± 2.81                          | -57.63 ± 6.42                          | 457.75                               |
|           | ( <i>P</i> )→( <i>M</i> ) | 0.68                                 | 91.12 ± 0.76                          | 71.86 ± 2.36                          | -64.61 ± 5.39                          | 1021.56                              |
| <b>2c</b> | ( <i>M</i> )→( <i>P</i> ) | 0.41                                 | 92.36 ± 0.94                          | 75.53 ± 2.80                          | -56.45 ± 6.24                          | 1684.62                              |
|           | ( <i>P</i> )→( <i>M</i> ) | 0.14                                 | 95.08 ± 0.67                          | 77.02 ± 1.99                          | -60.57 ± 4.43                          | 5046.91                              |

**Table S8.** Rotational Barrier Data for **3b** in **DMSO-*d*<sub>6</sub>**: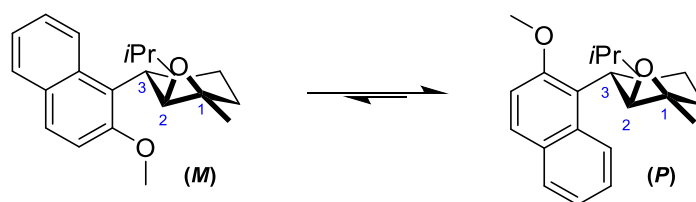

| <i>T</i> (K) | $k_{(M) \rightarrow (P)}$ ( $s^{-1}$ ) | $k_{(P) \rightarrow (M)}$ ( $s^{-1}$ ) |
|--------------|----------------------------------------|----------------------------------------|
| 343          | 0.029                                  | 0.024                                  |
| 353          | 0.081                                  | 0.059                                  |
| 363          | 0.171                                  | 0.163                                  |
| 373          | 0.397                                  | 0.375                                  |

**Graph S5.** Eyring fitting of EXSY rates for **3b** in **DMSO-*d*<sub>6</sub>**: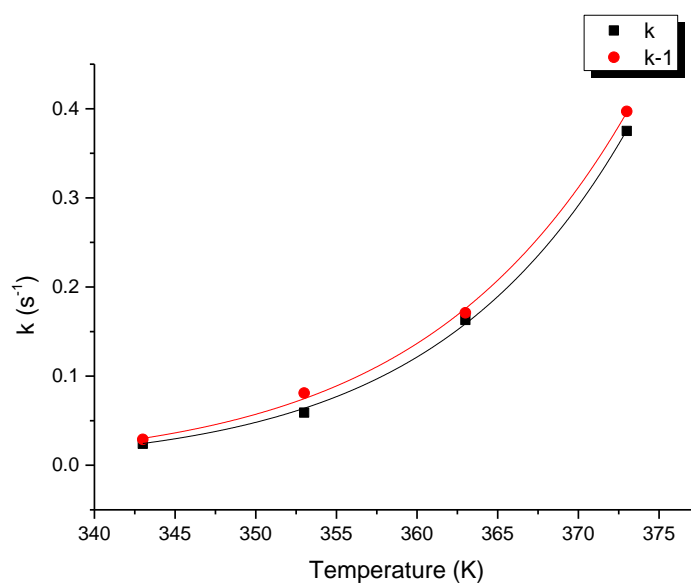

|                                | <i>(P) → (M)</i> |           | <i>(M) → (P)</i> |           |
|--------------------------------|------------------|-----------|------------------|-----------|
|                                | <i>Value</i>     | <i>SD</i> | <i>Value</i>     | <i>SD</i> |
| $\Delta G^\ddagger$ (kJ/mol)   | 94.86            | 0.77      | 93.59            | 0.83      |
| $\Delta H^\ddagger$ (kJ/mol)   | 93.99            | 3.01      | 88.29            | 3.25      |
| $\Delta S^\ddagger$ (J/mol.K)  | -2.95            | 7.51      | -17.78           | 8.14      |
| <i>Correlation coefficient</i> | 0.99914          |           | 0.99875          |           |

**Table S9.** Rotational Barrier Data for **3c** in **DMSO-*d*<sub>6</sub>**:

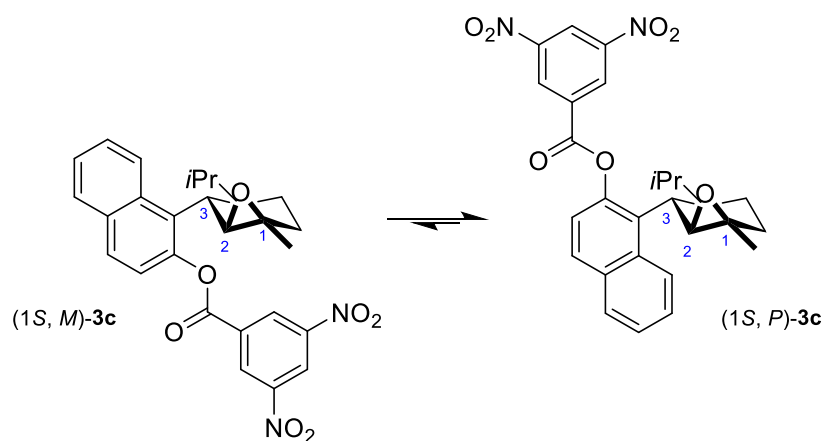

| <i>T</i> (K) | $k_{(M) \rightarrow (P)}$ (s <sup>-1</sup> ) | $k_{(P) \rightarrow (M)}$ (s <sup>-1</sup> ) |
|--------------|----------------------------------------------|----------------------------------------------|
| 343          | 0.049                                        | 0.020                                        |
| 353          | 0.130                                        | 0.057                                        |
| 363          | 0.323                                        | 0.141                                        |
| 373          | 0.664                                        | 0.324                                        |

**Graph S6.** Eyring fitting of EXSY rates for **3c** in **DMSO-*d*<sub>6</sub>**:

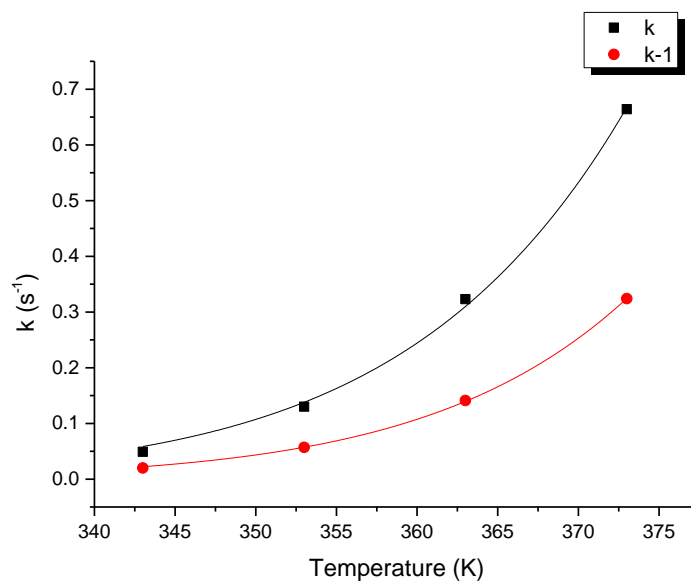

|                                | <i>(P) → (M)</i> |           | <i>(M) → (P)</i> |           |
|--------------------------------|------------------|-----------|------------------|-----------|
|                                | <i>Value</i>     | <i>SD</i> | <i>Value</i>     | <i>SD</i> |
| $\Delta G$ (kJ/mol)            | 94.81            | 0.37      | 91.30            | 1.02      |
| $\Delta H$ (kJ/mol)            | 91.89            | 1.44      | 83.30            | 4.03      |
| $\Delta S$ (J/mol.K)           | -9.79            | 3.59      | -26.83           | 10.09     |
| <i>Correlation coefficient</i> | 0.99979          |           | 0.99775          |           |

**Table S10.** Activation and Kinetic Parameters of Naphthylcyclohexene oxide **3b,c** conformers in DMSO-*d*<sub>6</sub> at 298.15 K.

|           | <i>Sub.</i>               | <i>k</i> ( <i>ms</i> <sup>-1</sup> ) | $\Delta G^\ddagger$ ( <i>kJ/mol</i> ) | $\Delta H^\ddagger$ ( <i>kJ/mol</i> ) | $\Delta S^\ddagger$ ( <i>J/mol.K</i> ) | <i>t</i> <sub>1/2</sub> ( <i>s</i> ) |
|-----------|---------------------------|--------------------------------------|---------------------------------------|---------------------------------------|----------------------------------------|--------------------------------------|
| <b>3b</b> | ( <i>M</i> )→( <i>P</i> ) | 0.25                                 | 93.59 ± 0.83                          | 88.29 ± 3.25                          | -17.78 ± 8.14                          | 2766.87                              |
|           | ( <i>P</i> )→( <i>M</i> ) | 0.15                                 | 94.86 ± 0.77                          | 93.99 ± 3.01                          | -2.95 ± 7.51                           | 4618.31                              |
| <b>3c</b> | ( <i>M</i> )→( <i>P</i> ) | 0.63                                 | 91.30 ± 1.02                          | 83.30 ± 4.03                          | -26.83 ± 10.09                         | 1098.49                              |
|           | ( <i>P</i> )→( <i>M</i> ) | 0.15                                 | 94.81 ± 0.37                          | 91.89 ± 1.44                          | -9.79 ± 3.59                           | 4526.09                              |

VT-EXSY Spectra at 500 MHz for 2a in DMSO-d<sub>6</sub> at 383 K with d8 = 200 ms

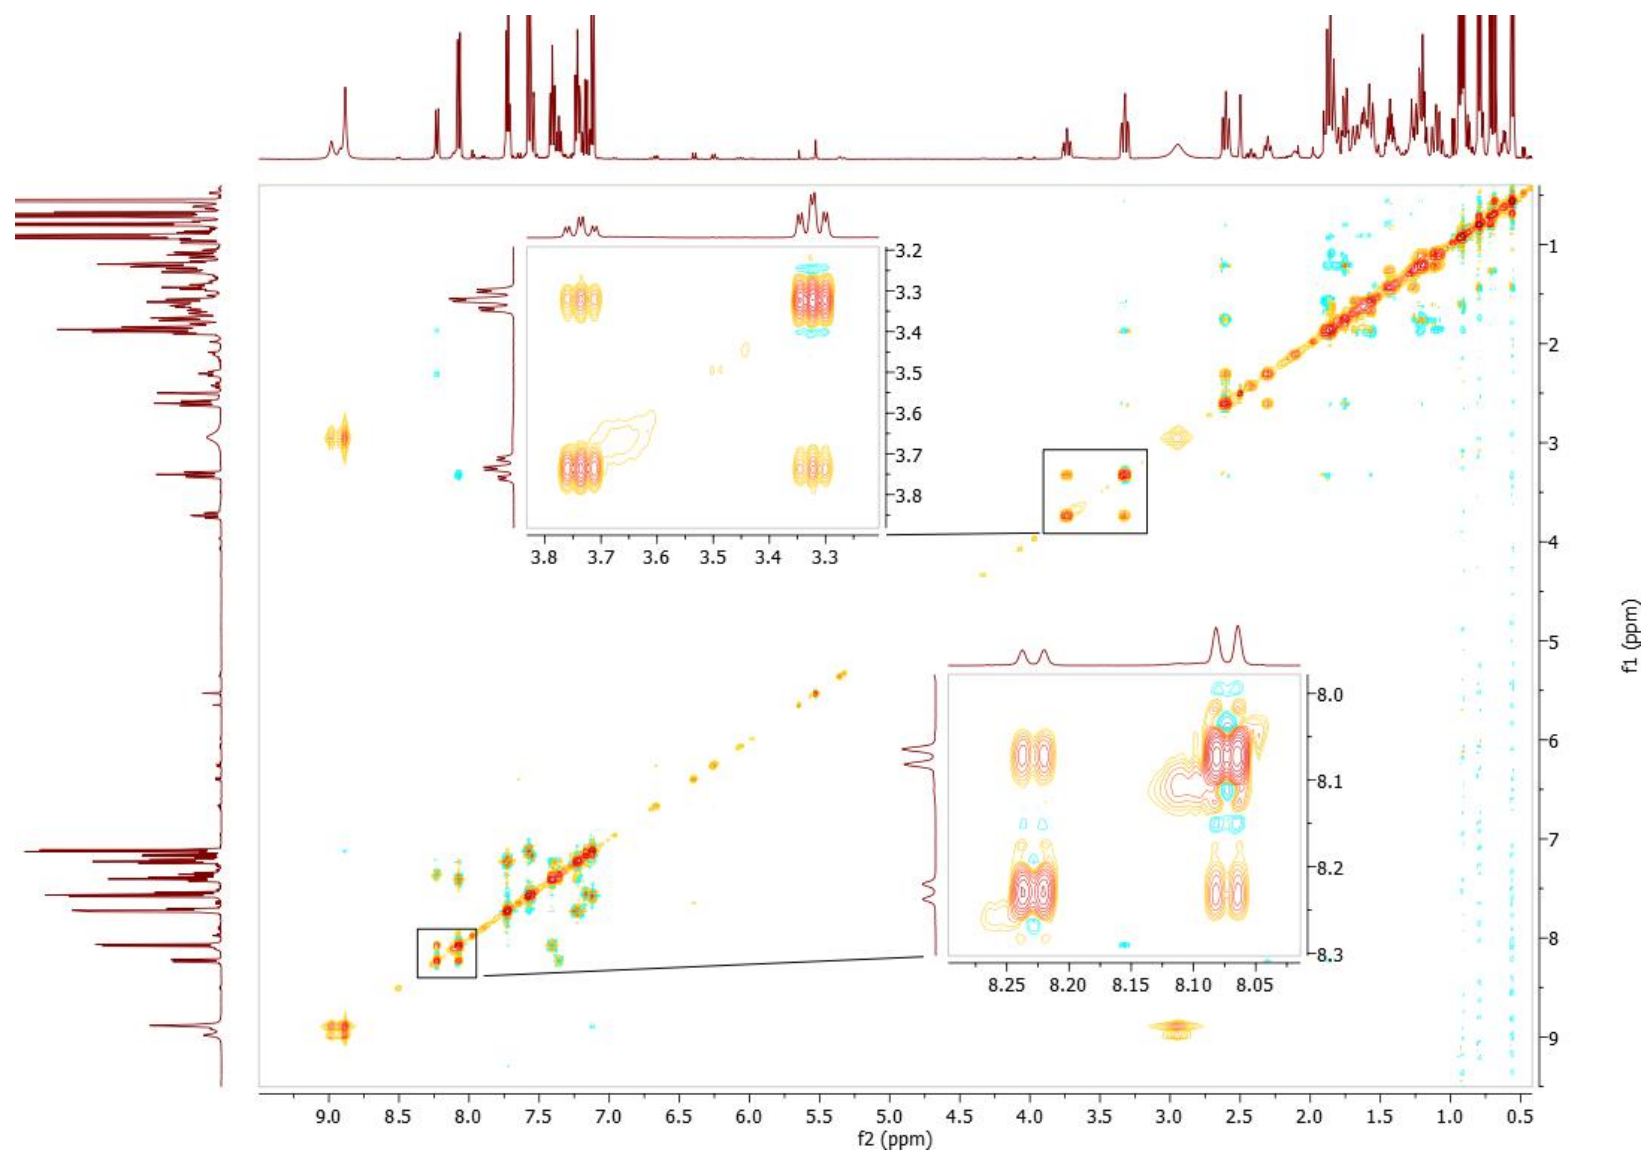



VT-EXSY Spectra at 500 MHz for **2b** in DMSO-*d*<sub>6</sub> at 383 K with d8 = 200 ms

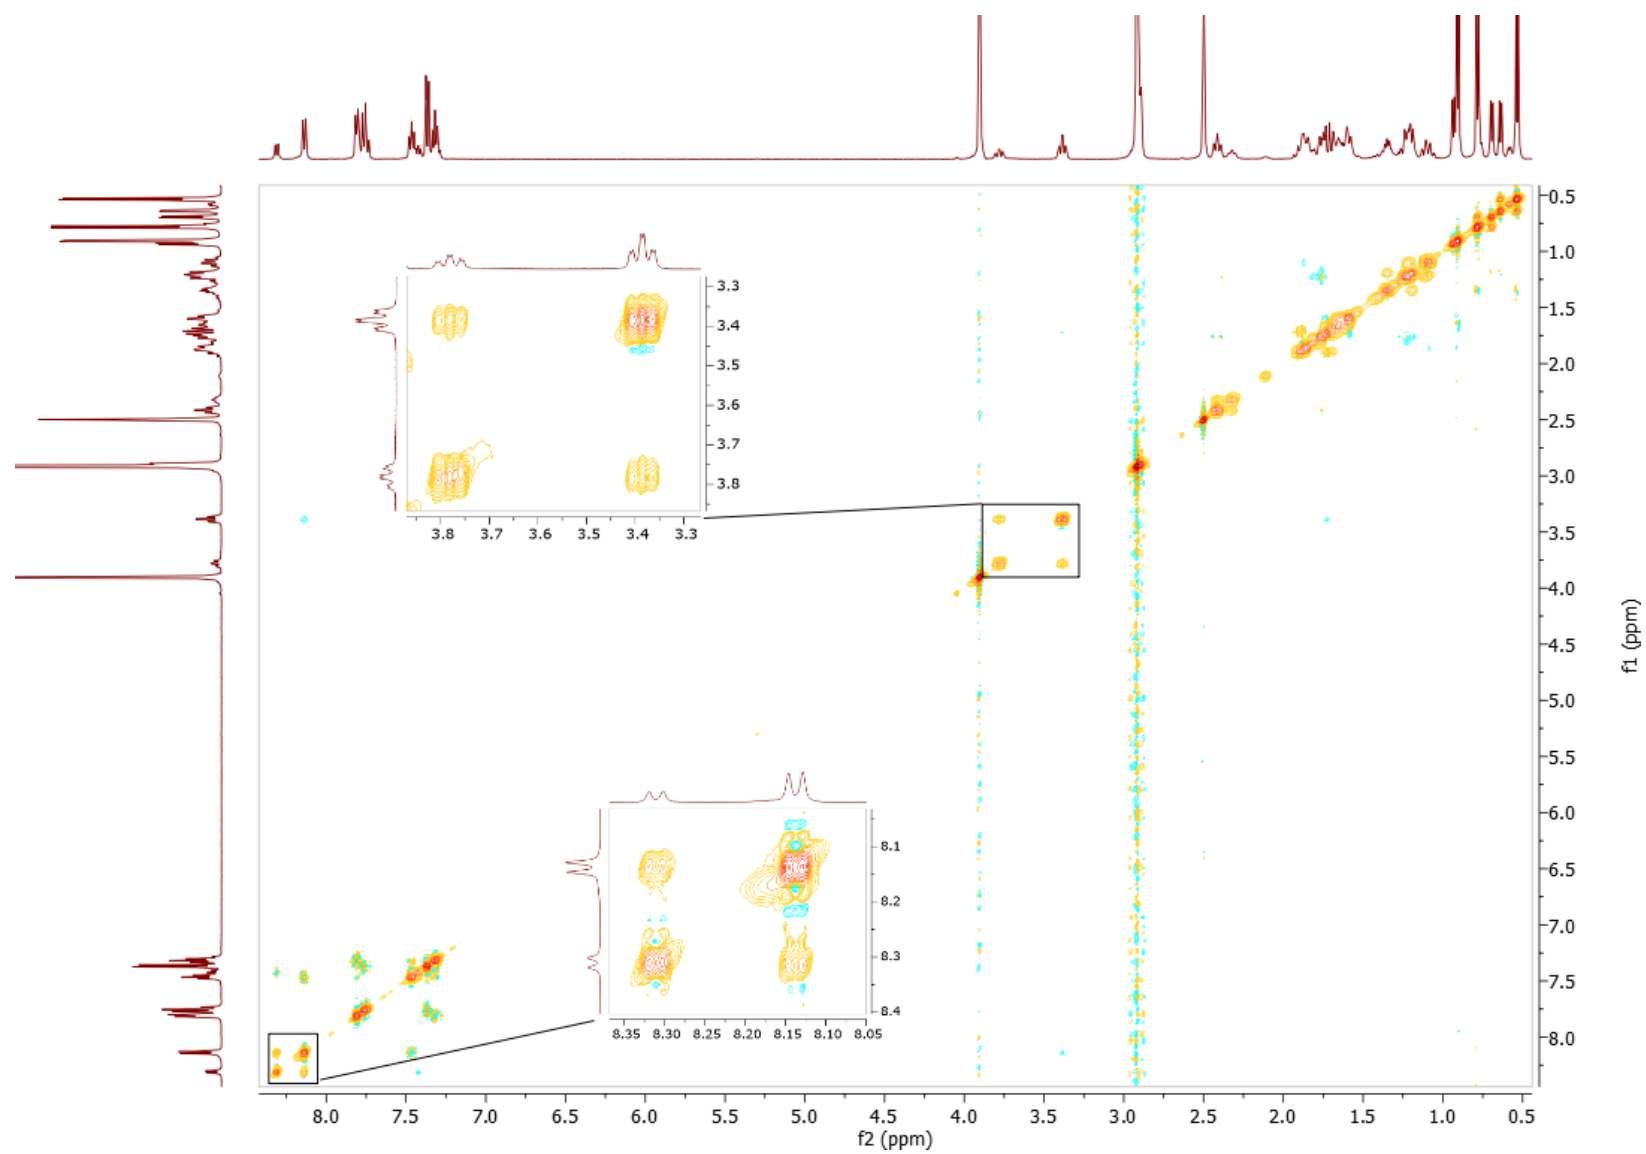

VT-EXSY Spectra at 500 MHz for **2c** in DMSO-*d*<sub>6</sub> at 383 K with d8 = 200 ms

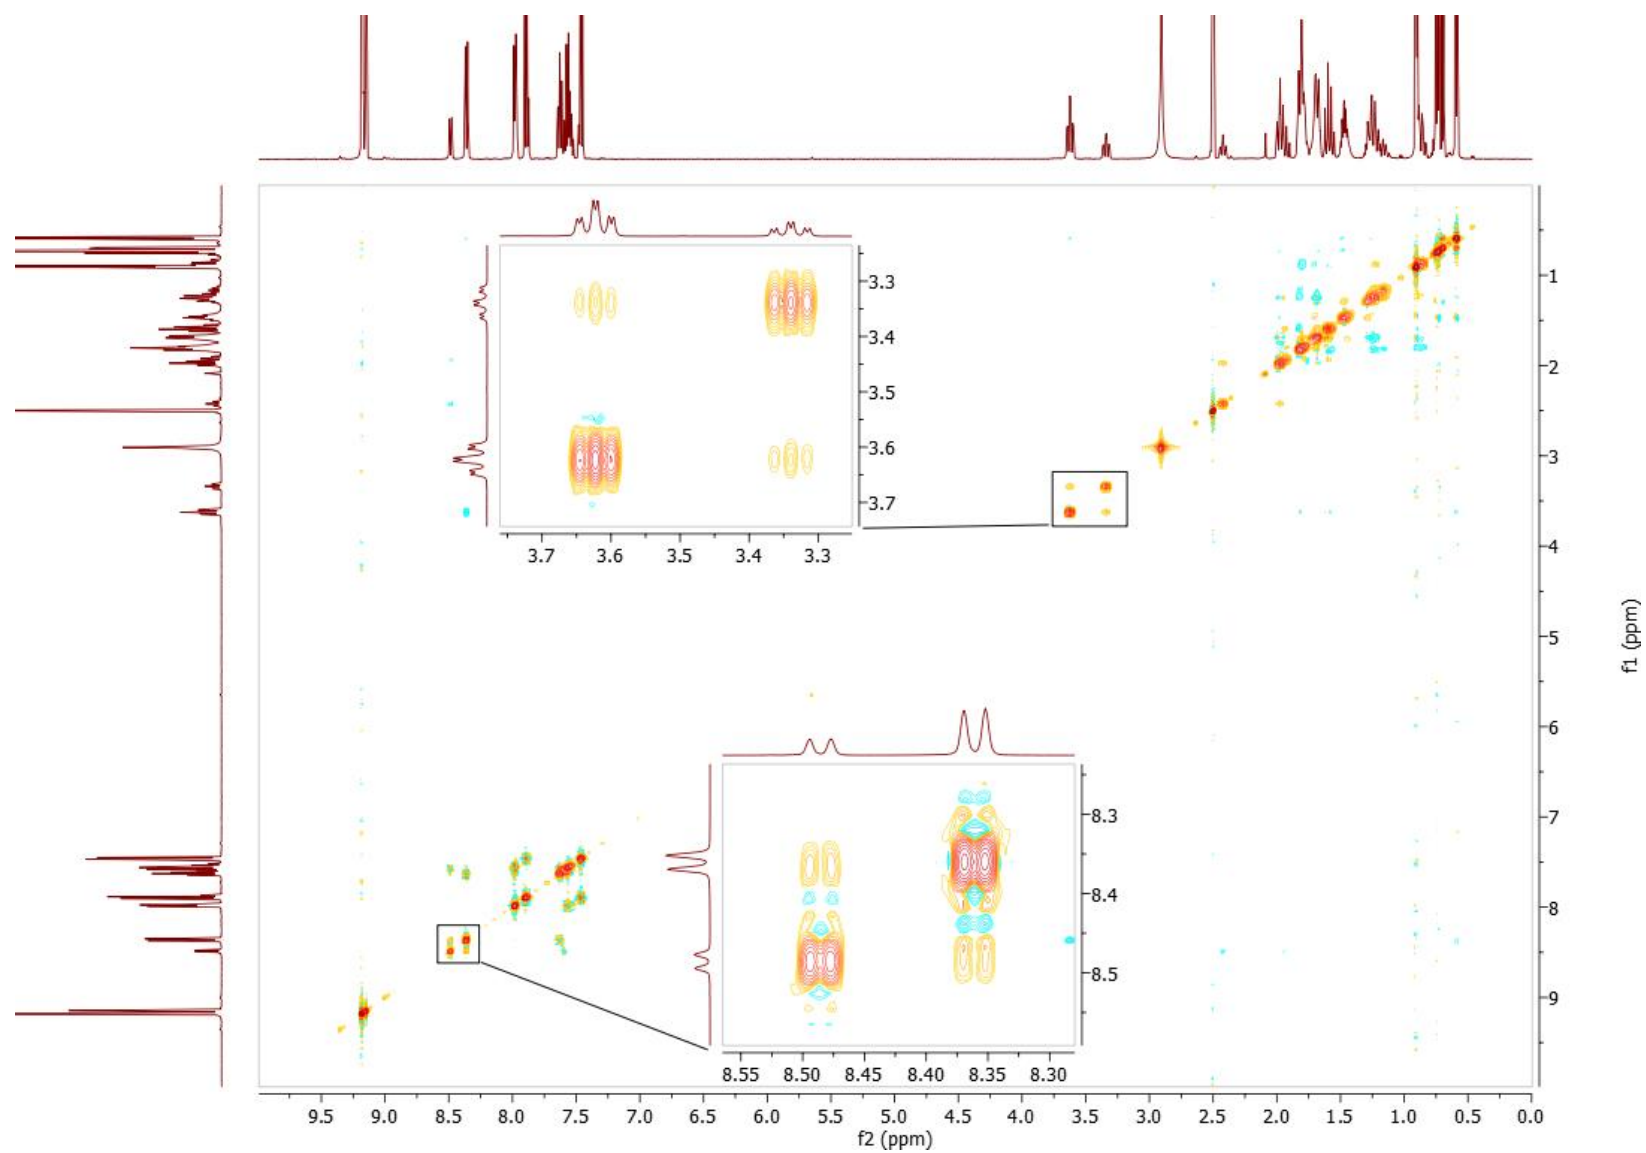

VT-EXSY Spectra at 500 MHz for **3b** in DMSO- $d_6$  at 383 K with  $d_8 = 200$  ms

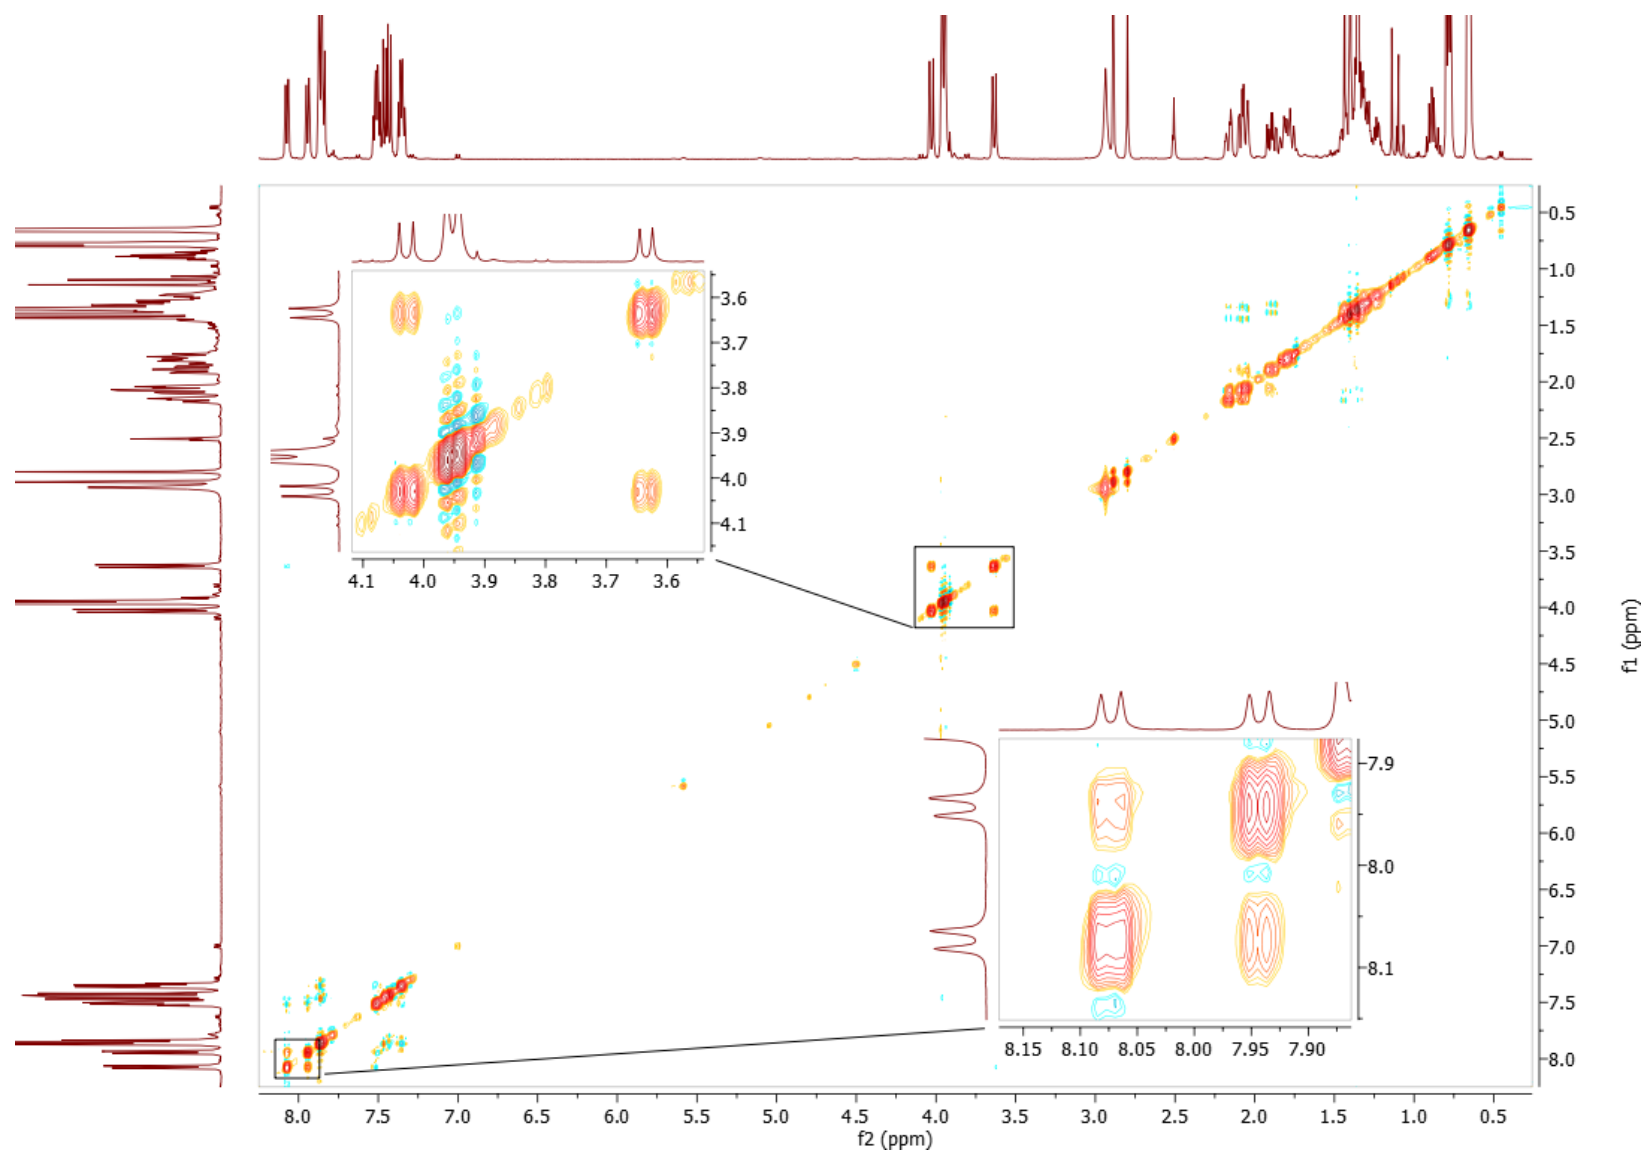

VT-EXSY Spectra at 500 MHz for **3c** in DMSO-*d*<sub>6</sub> at 383 K with d8 = 200 ms

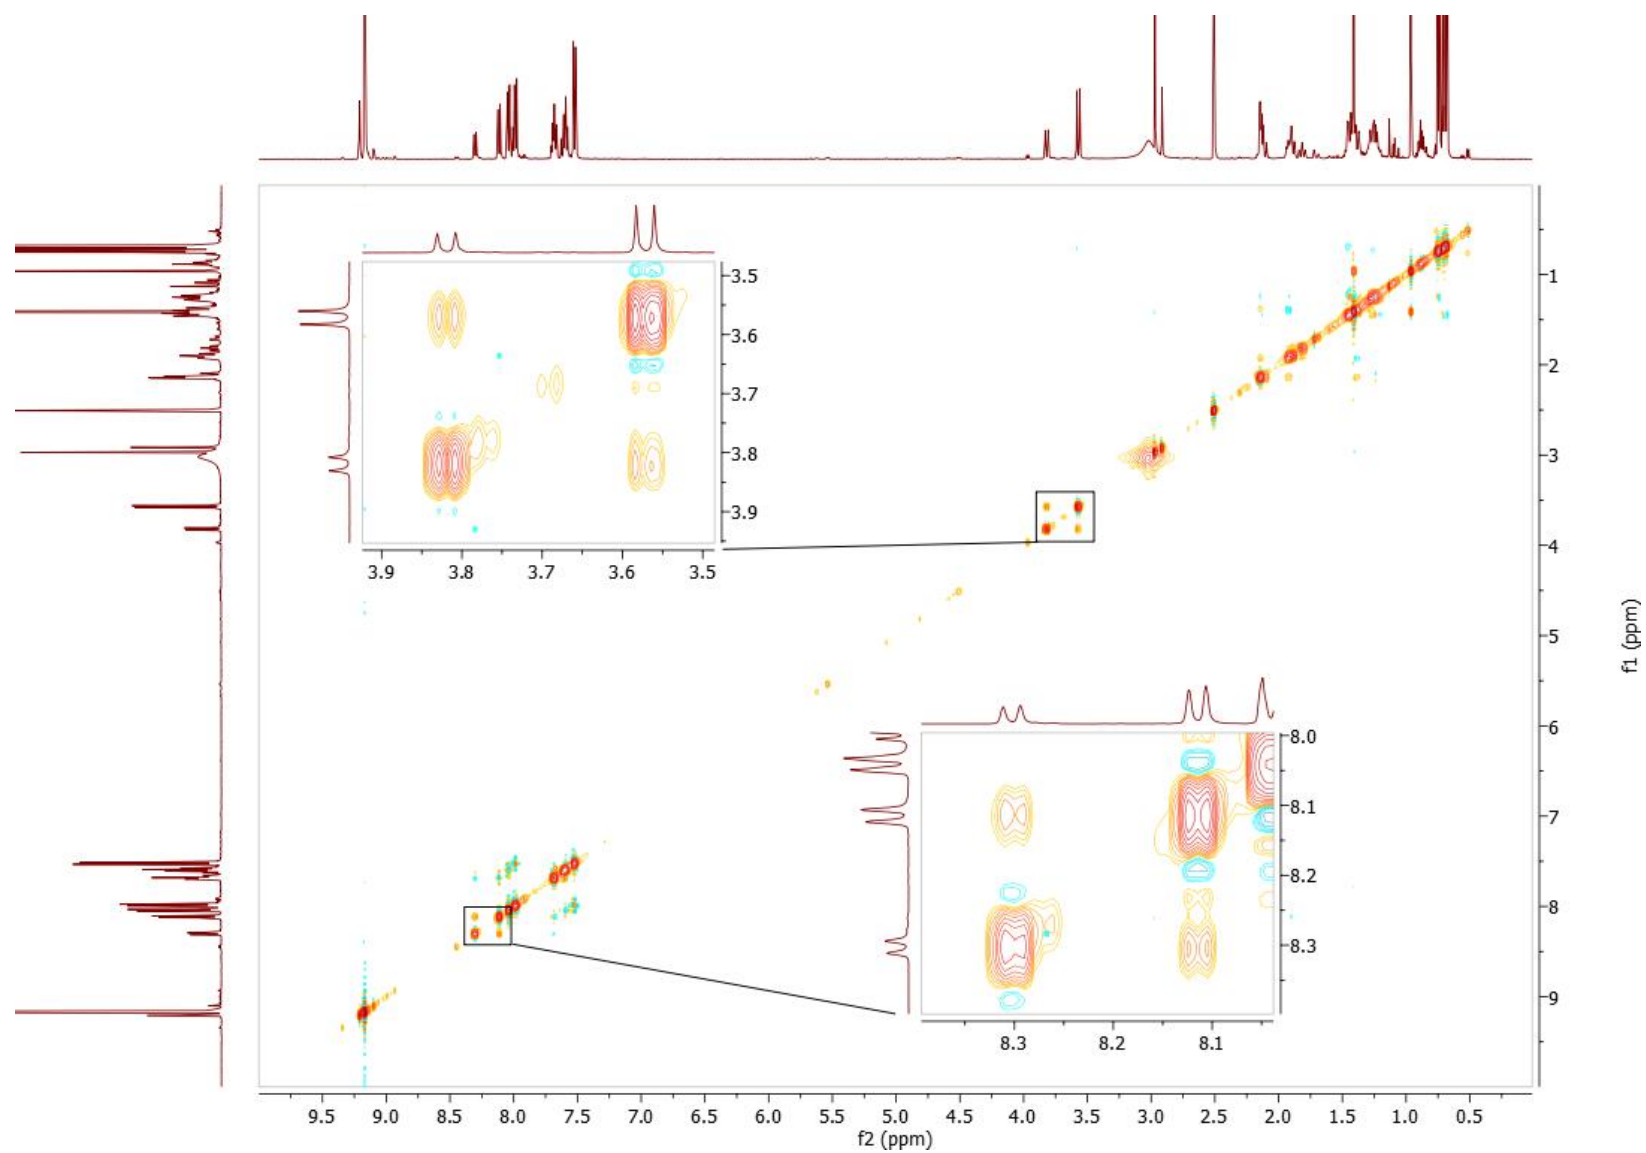

Single-crystal X-ray structure of (P)-2c:

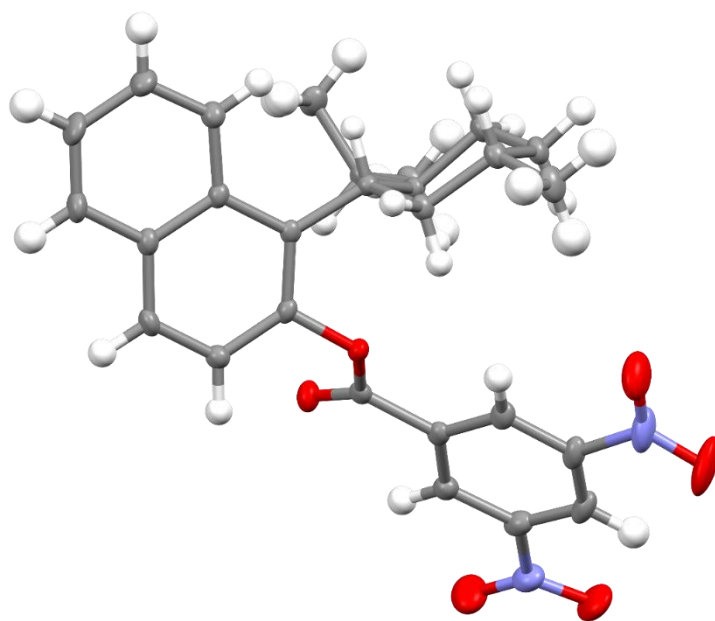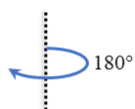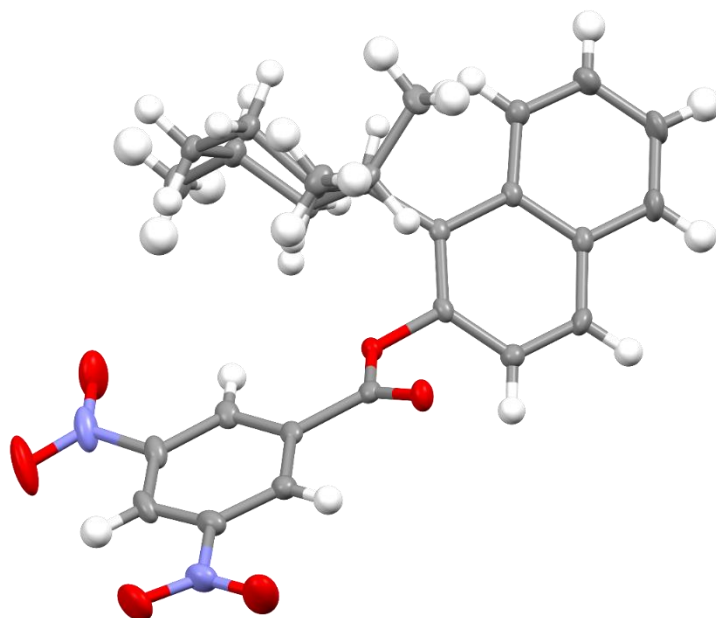

**Table S11:** Crystal data and structure refinement for (*P*)-**2c** ([CCDC-2226732](#)).

Empirical formula  $C_{27}H_{28}N_2O_6$

Formula weight 476.51

Temperature/K 103

Crystal system monoclinic

Space group P21

$a/\text{\AA}$  11.6688(4)

$b/\text{\AA}$  7.6572(2)

$c/\text{\AA}$  13.4891(4)

$\alpha/^\circ$  90

$\beta/^\circ$  101.345(2)

$\gamma/^\circ$  90

Volume/ $\text{\AA}^3$  1181.71(6)

Z 2

$\rho_{\text{calc}}/\text{cm}^3$  1.339

$\mu/\text{mm}^{-1}$  0.751

F(000) 536.0

Crystal size/ $\text{mm}^3$   $0.4 \times 0.3 \times 0.3$

Radiation  $\text{CuK}\alpha$  ( $\lambda = 1.54184$ )

$2\theta$  range for data collection/ $^\circ$  10.542 to 146.628

Index ranges  $-6 \leq h \leq 8$ ,  $-11 \leq k \leq 11$ ,  $-24 \leq l \leq 24$

Reflections collected 4948

Independent reflections 2428 [ $R_{\text{int}} = 0.0215$ ,  $R_{\text{sigma}} = 0.0204$ ]

Data/restraints/parameters 2428/0/173

Goodness-of-fit on  $F_2$  1.141

Final R indexes [ $I \geq 2\sigma(I)$ ]  $R_1 = 0.0443$ ,  $wR_2 = 0.1214$

Final R indexes [all data]  $R_1 = 0.0548$ ,  $wR_2 = 0.1490$

Largest diff. peak/hole /  $e \text{\AA}^{-3}$  0.21/-0.20

### Quantum Chemical Calculations:

All structures were fully optimized with the M06-2X<sup>1</sup> DFT method with 6-311+G(2d,p) basis set for all atoms. D3 version of Grimme's dispersion with the original D3 damping function<sup>2</sup> is added for all calculations. The nature of all extrema as minimum or transition state was characterized with analytical calculations of frequencies at 298.15 K and 1 Atm, and the transition states were connected to reactants and products with IRC calculations. Transition states were located using synchronous Transit-Guided Quasi-Newton method (STQN)<sup>3</sup> and fully optimized using Berny algorithm. The solvent effect (dimethyl sulfoxide with  $\epsilon$  of 46.7 or THF with  $\epsilon$  of 7.58) was taken in account using the IEFPCM formalism during optimization and frequency calculations. All calculations were done with the Gaussian16 revision B.01 program packages. Graphical representations were done using ChimeraX 1.6.1 software.<sup>4</sup> Noncovalent interaction analysis were performed with NCIPLLOT 4.0 software<sup>5</sup> and visualizations were done by VMD program.<sup>6</sup>

Full reference of Gaussian16 software:

Gaussian16, Revision B.01

M. J. Frisch, G. W. Trucks, H. B. Schlegel, G. E. Scuseria, M. A. Robb, J. R. Cheeseman, G. Scalmani, V. Barone, G. A. Petersson, H. Nakatsuji, X. Li, M. Caricato, A. V. Marenich, J. Bloino, B. G. Janesko, R. Gomperts, B. Mennucci, H. P. Hratchian, J. V. Ortiz, A. F. Izmaylov, J. L. Sonnenberg, D. Williams-Young, F. Ding, F. Lipparini, F. Egidi, J. Goings, B. Peng, A. Petrone, T. Henderson, D. Ranasinghe, V. G. Zakrzewski, J. Gao, N. Rega, G. Zheng, W. Liang, M. Hada, M. Ehara, K. Toyota, R. Fukuda, J. Hasegawa, M. Ishida, T. Nakajima, Y. Honda, O. Kitao, H. Nakai, T. Vreven, K. Throssell, J. A. Montgomery, Jr., J. E. Peralta, F. Ogliaro, M. J. Bearpark, J. J. Heyd, E. N. Brothers, K. N. Kudin, V. N. Staroverov, T. A. Keith, R. Kobayashi, J. Normand, K. Raghavachari, A. P. Rendell, J. C. Burant, S. S. Iyengar, J. Tomasi, M. Cossi, J. M. Millam, M. Klene, C. Adamo, R. Cammi, J. W. Ochterski, R. L. Martin, K. Morokuma, O. Farkas, J. B. Foresman, and D. J. Fox, Gaussian, Inc., Wallingford CT, 2016.

---

<sup>1</sup> Zhao, Y.; Truhlar, D.G. *Theor. Chem. Acc.* **2008**, *120*, 215.

<sup>2</sup> Grimme, S.; Antony, J.; Ehrlich, S.; Krieg, J. *J. Chem. Phys.* **2010**, *132*, 154104.

<sup>3</sup> a) Peng, C.; Schlegel, H.B. *Israel J. of Chem.* **1993**, *33*, 449; b) Peng, C.; Ayala, P.Y.; Schlegel, H.B.; Frisch, M.J. *J. Comp. Chem.* **1996**, *17*, 49.

<sup>4</sup> E. F. Pettersen, T. D. Goddard, C. C Huang, E. C. Meng, G. S. Couch, T. I. Croll, J. H. Morris, T. E. Ferrin, *Protein Sci.* **2021**, *30*, 70–82.

<sup>5</sup> a) Johnson, E. R.; Keinan, S.; Mori-Sanchez, P.; Contreras-Garcia, J.; J. Cohen, A. J.; Yang, W. *J. Am. Chem. Soc.* **2010**, *132*, 6498-6506, b) Contreras-Garcia, J.; Johnson, E. R.; Keinan, S.; R. Chaudret, Piquemal, J-P.; Beratan, D. N.; Yang, W. *J. Chem. Theory Comput.* **2011**, *7*, 625-632, c) Boto, R. A.; Peccati, F.; Laplaza, R.; Quan, C.; Carbone, A.; Piquemal, J.-P.; Maday, Y.; Contreras-Garcia, J. *J. Chem. Theory Comput.* **2020**, *16*, 4150-4158.

<sup>6</sup> Humphrey, W.; Dalke, A.; Schulten, K. *J. Molec. Graphics*, **1996**, *14*, 33-38.

<http://www.ks.uiuc.edu/Research/vmd/>

**Table S12.** Thermodynamic parameters of **2a** conformational equilibrium calculated in DMSO at the IEFPCM/M06-2X-D3/6-311+G(2d,p) level of theory.

|                            | ( <i>M</i> )- <b>2a</b> | ( <i>P</i> )- <b>2a</b> | TS1- <b>2a</b> | TS2- <b>2a</b> |
|----------------------------|-------------------------|-------------------------|----------------|----------------|
| $\Delta H^\circ$ (kJ/mol)  | 2.14                    | 0.00                    | 90.7           | 85.3           |
| $\Delta G^\circ$ (kJ/mol)  | 3.73                    | 0.00                    | 98.6           | 96.4           |
| $\Delta S^\circ$ (J/mol.K) | -5.32                   | 0.00                    | -26.3          | -37.1          |
| $\mu$ (Debye)              | 1.85                    | 1.95                    | 1.70           | 1.80           |

**Figure S1.** Geometrical parameters of (*M*)-**2a** and (*P*)-**2a** atropisomers calculated in DMSO at the IEFPCM/M06-2X-D3/6-311+G(2d,p) level of theory.

(*M*)-**2a**

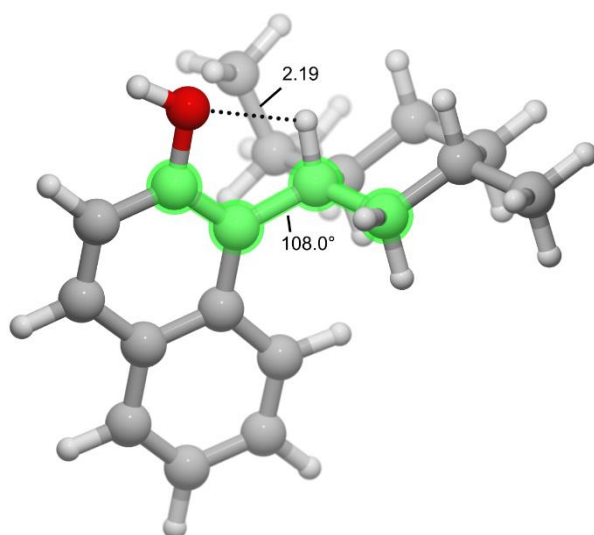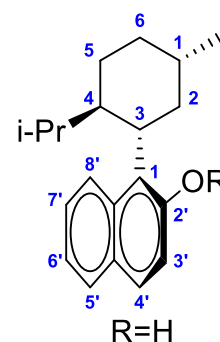

(*P*)-**2a**

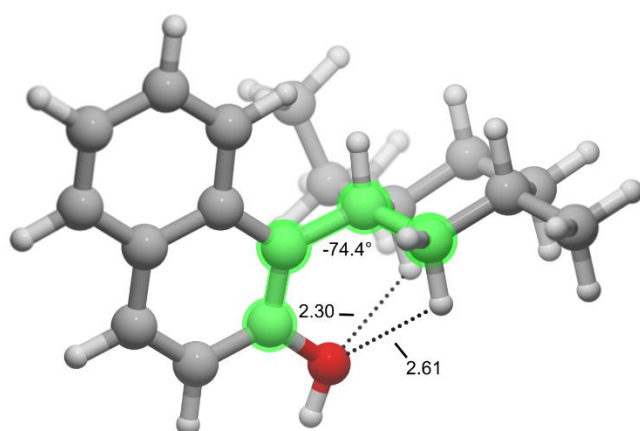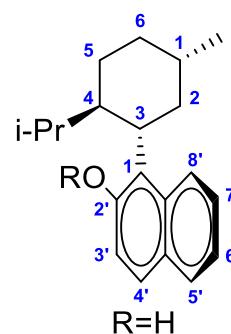



**Table S13.** NBO analysis of (*M*)-**2a** atropisomer in DMSO at the IEFPCM/M06-2X-D3/6-311+G(2d,p) level of theory.

| <i>Donnor</i>          | <i>Acceptor</i>               | <i>Energy</i> |
|------------------------|-------------------------------|---------------|
| $\sigma$ C8'H8'        | $\sigma^*$ C4H4               | 3.31          |
| $\sigma$ C4H4          | $\sigma^*$ C8'H8'             | 4.10          |
| $\sigma$ C8'H8'        | $\sigma^*$ C2H2 $\alpha$      | 1.59          |
| $\sigma$ C2H2 $\alpha$ | $\sigma^*$ C8'H8'             | 2.18          |
| $\sigma$ C3H3          | $\pi^*$ C1'C8a'               | 25.40         |
| $\pi$ C1'C8a'          | $\sigma^*$ C3H3               | 4.02          |
| $\sigma$ CH i-Pr       | $\pi^*$ C1'C2'                | 2.09          |
| n O2'                  | $\sigma^*$ C3H3               | 7.41          |
| n O2'                  | $\sigma^*$ CH Me $\beta$ i-Pr | 5.44          |
|                        | <b>Total</b>                  | <b>55.52</b>  |

**Table S14.** NBO analysis of (*P*)-**2a** atropisomer in DMSO at the IEFPCM/M06-2X-D3/6-311+G(2d,p) level of theory.

| <i>Donnor</i>   | <i>Acceptor</i>          | <i>Energy</i> |
|-----------------|--------------------------|---------------|
| $\sigma$ C8'H8' | $\sigma^*$ C3H3          | 6.07          |
| $\sigma$ C3H3   | $\sigma^*$ C8'H8'        | 2.64          |
| $\sigma$ C3H3   | $\pi^*$ C1'C2'           | 20.42         |
| $\pi$ C1'C2'    | $\sigma^*$ C3H3          | 4.81          |
| $\pi$ C1'C2'    | $\sigma^*$ CH i-Pr       | 2.13          |
| n O2'           | $\sigma^*$ C4H4          | 5.77          |
| n O2'           | $\sigma^*$ C2H2 $\alpha$ | 1.38          |
|                 | <b>Total</b>             | <b>43.22</b>  |

**Figure S2.** NCI analysis of (*M*)-**2a** and (*P*)-**2a** atropisomers implied in **2a** conformational equilibrium.

(*M*)-**2a**

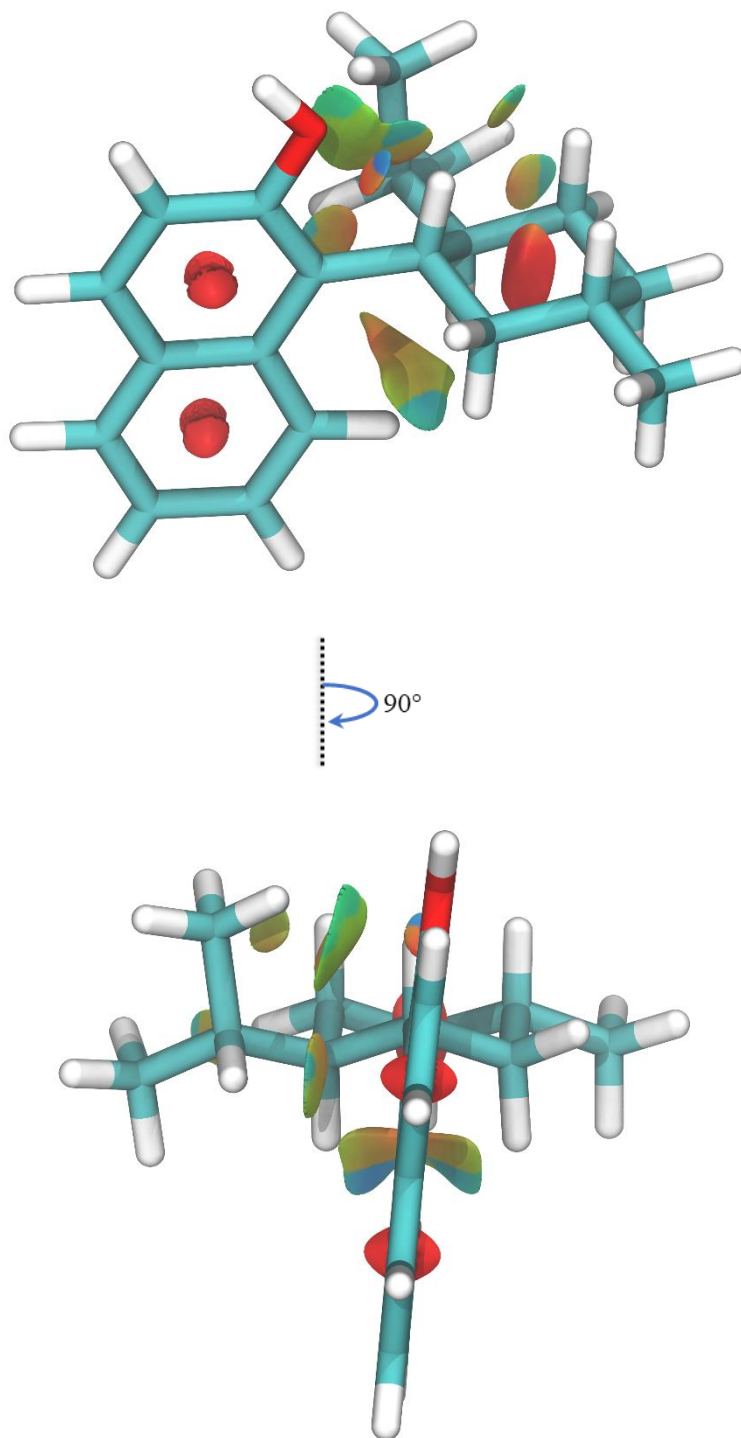

(P)-2a

---

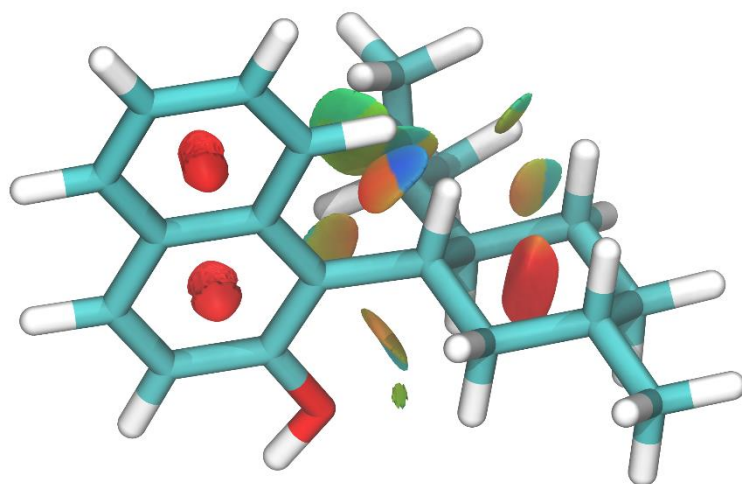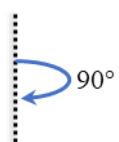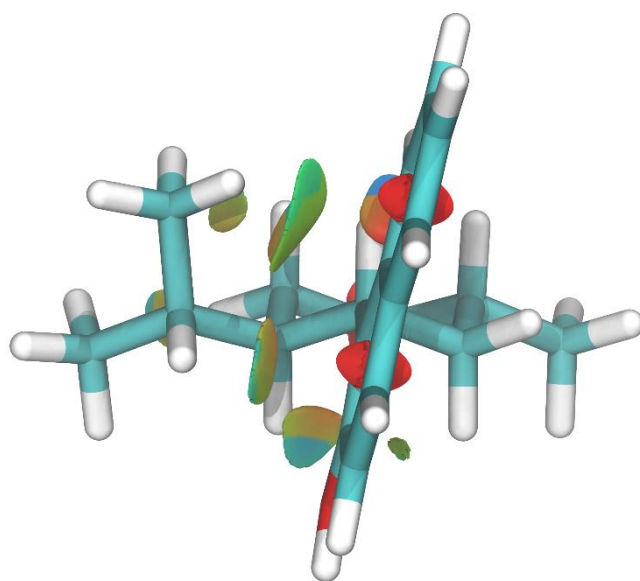

**Figure S3.** Plots of RDG vs  $\text{sign}(\lambda_2)\rho$  of (*M*)-**2a** and (*P*)-**2a** atropisomers and quantitative analysis in the attractive ( $\text{sign}(\lambda_2)\rho < 0$ ), VDW ( $\text{sign}(\lambda_2)\rho \approx 0$ ) and repulsive regions ( $\text{sign}(\lambda_2)\rho > 0$ ).

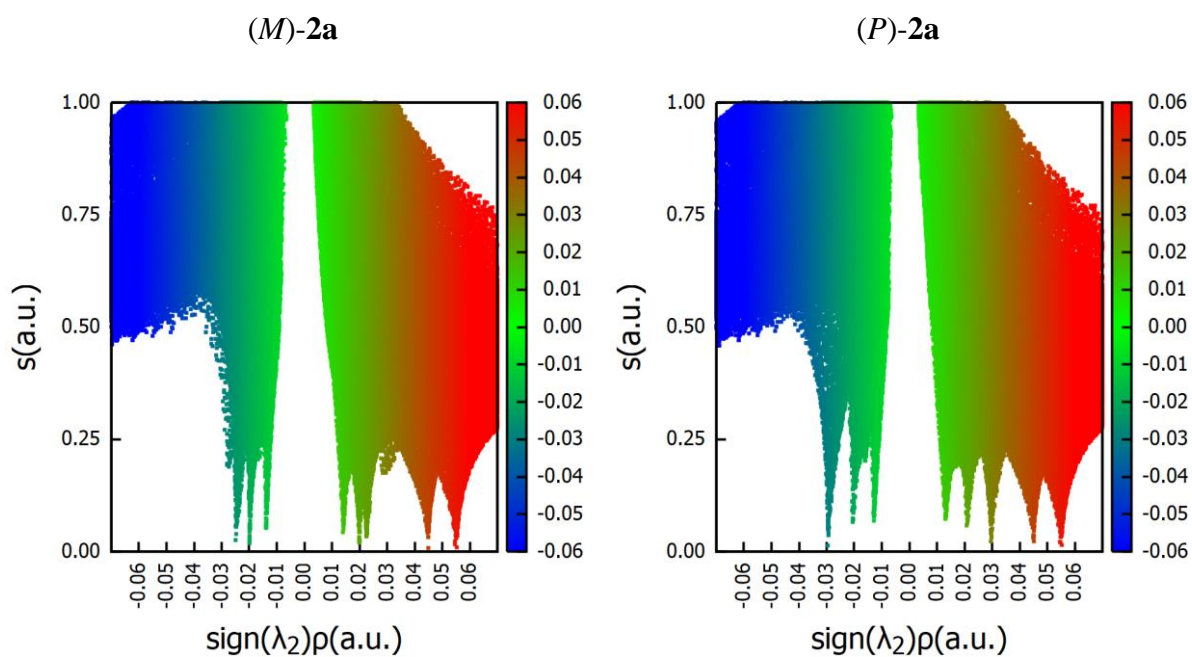

|                                  | <i>Attractive region</i> | <i>VDW region</i> | <i>Repulsive region</i> |
|----------------------------------|--------------------------|-------------------|-------------------------|
| ( <i>M</i> )- <b>2a</b>          | -0.1523                  | 0.0027            | 0.2845                  |
| ( <i>P</i> )- <b>2a</b>          | -0.1526                  | 0.0027            | 0.2845                  |
| ( <i>M</i> ) versus ( <i>P</i> ) | 3.25E-04                 | -2.10E-07         | -4.50E-05               |

**Figure S4.** Geometrical parameters of located transition states implied in **2a** conformational equilibrium calculated in DMSO at the IEFPCM/M06-2X-D3/6-311+G(2d,p) level of theory.

TS1-2a

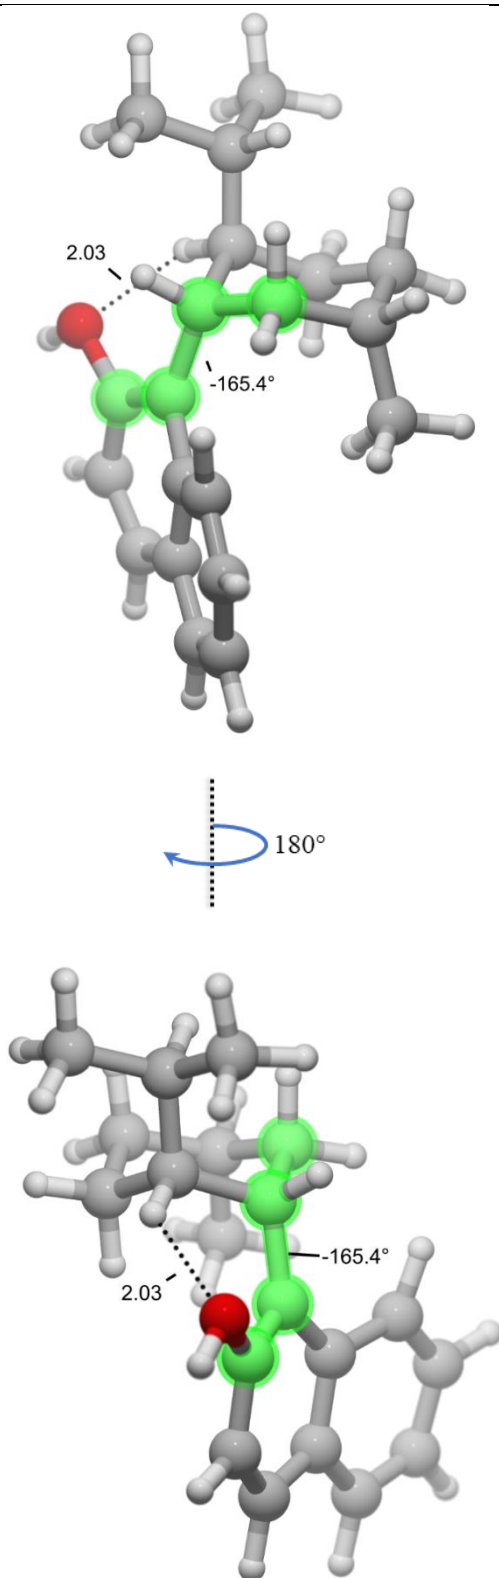

TS2-2a

---

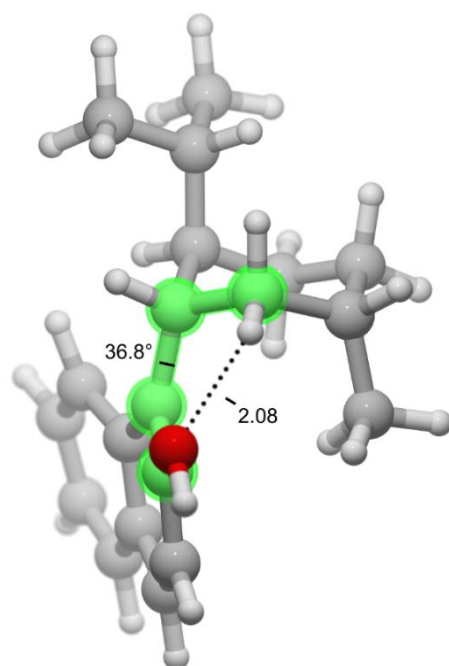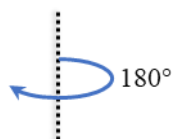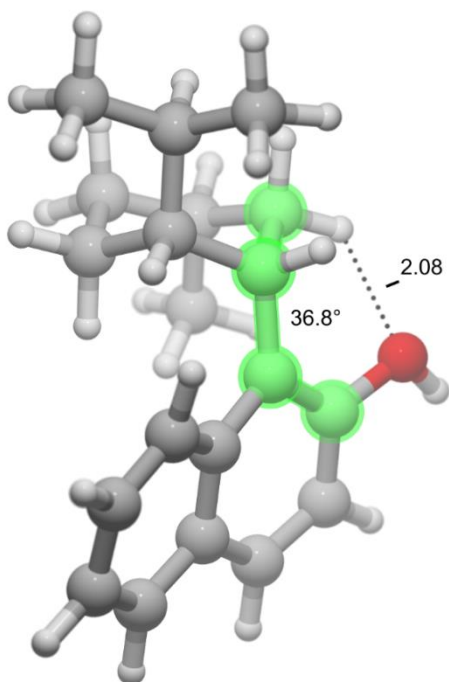

**Figure S5.** NCI analysis of located transition states implied in **2a** conformational equilibrium.

TS1-2a

---

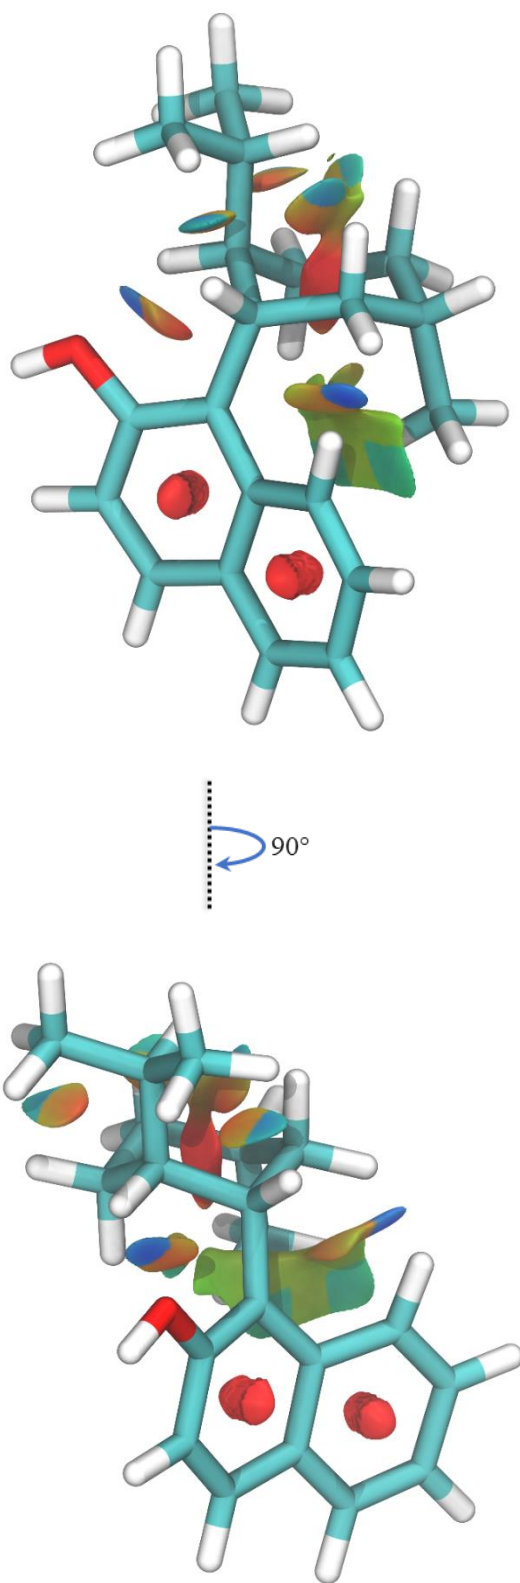

TS2-2a

---

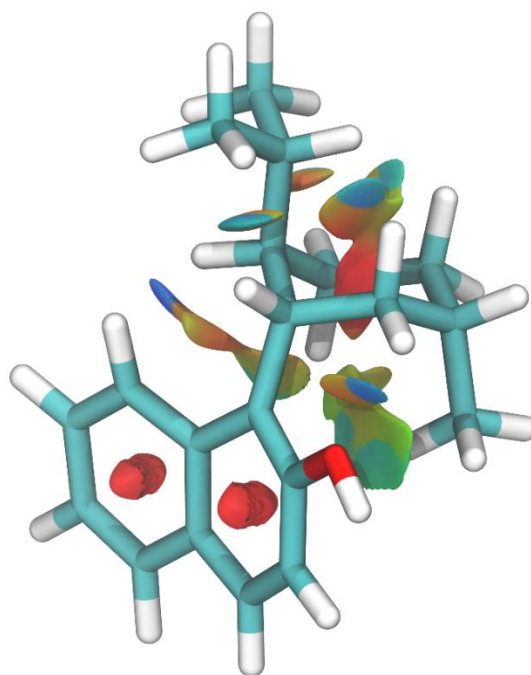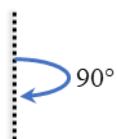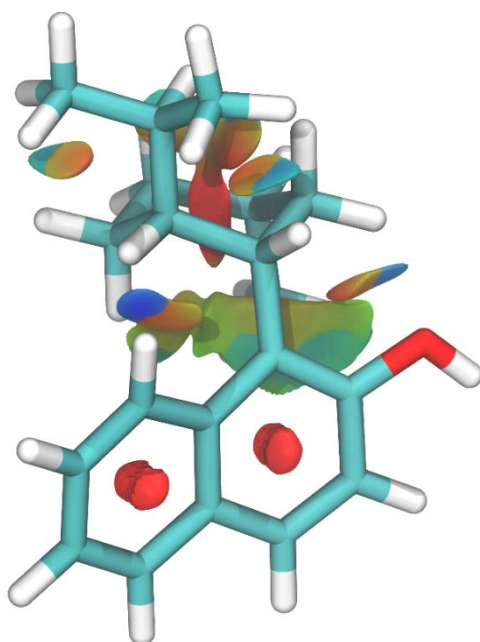



**Table S15.** Thermodynamic parameters of **2b** conformational equilibrium calculated in DMSO at the IEFPCM/M06-2X-D3/6-311+G(2d,p) level of theory.

|                            | ( <i>M</i> )- <b>2b</b> | ( <i>P</i> )- <b>2b</b> | TS1- <b>2b</b> | TS2- <b>2b</b> |
|----------------------------|-------------------------|-------------------------|----------------|----------------|
| $\Delta H^\circ$ (kJ/mol)  | 2.51                    | 0.00                    | 90.6           | 86.0           |
| $\Delta G^\circ$ (kJ/mol)  | 4.38                    | 0.00                    | 101.0          | 98.6           |
| $\Delta S^\circ$ (J/mol.K) | -6.28                   | 0.00                    | -34.8          | -42.6          |
| $\mu$ (debye)              | 2.11                    | 2.21                    | 1.92           | 2.24           |

**Figure S6.** Geometrical parameters of (*M*)-**2b** and (*P*)-**2b** atropisomers calculated in DMSO at the IEFPCM/M06-2X-D3/6-311+G(2d,p) level of theory.

(*M*)-**2b**

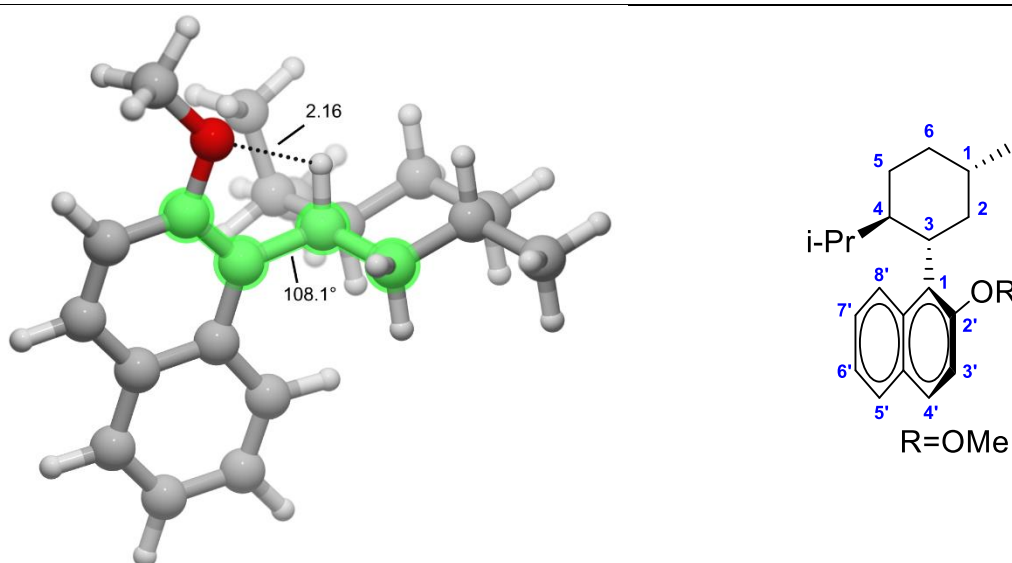

(*P*)-**2b**

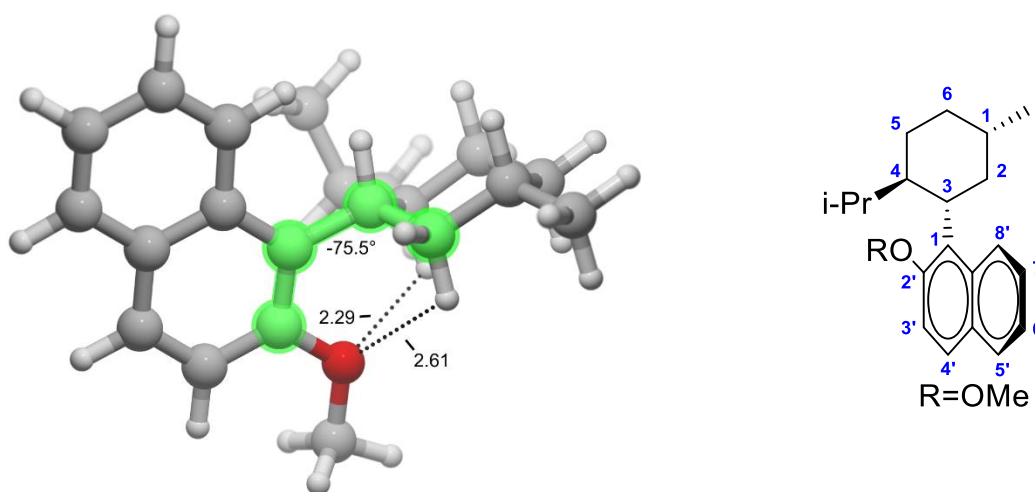

**Table S16.** NBO analysis of (*M*)-**2b** atropisomer in DMSO at the IEFPCM/M06-2X-D3/6-311+G(2d,p) level of theory.

| <i>Donnor</i>          | <i>Acceptor</i>               | <i>Energy</i> |
|------------------------|-------------------------------|---------------|
| $\sigma$ C8'H8'        | $\sigma^*$ C4H4               | 3.31          |
| $\sigma$ C4H4          | $\sigma^*$ C8'H8'             | 4.02          |
| $\sigma$ C8'H8'        | $\sigma^*$ C2H2 $\alpha$      | 1.63          |
| $\sigma$ C2H2 $\alpha$ | $\sigma^*$ C8'H8'             | 2.26          |
| $\sigma$ C3H3          | $\pi^*$ C1'C8a'               | 24.89         |
| $\pi$ C1'C8a'          | $\sigma^*$ C3H3               | 4.10          |
| $\sigma$ CH i-Pr       | $\pi^*$ C1'C2'                | 1.97          |
| n O2'                  | $\sigma^*$ C3H3               | 8.37          |
| n O2'                  | $\sigma^*$ CH Me $\beta$ i-Pr | 3.89          |
|                        | <b>Total</b>                  | <b>54.43</b>  |

**Table S17.** NBO analysis of (*P*)-**2b** atropisomer in DMSO at the IEFPCM/M06-2X-D3/6-311+G(2d,p) level of theory.

| <i>Donnor</i>   | <i>Acceptor</i>          | <i>Energy</i> |
|-----------------|--------------------------|---------------|
| $\sigma$ C8'H8' | $\sigma^*$ C3H3          | 6.28          |
| $\sigma$ C3H3   | $\sigma^*$ C8'H8'        | 2.59          |
| $\sigma$ C3H3   | $\pi^*$ C1'C2'           | 21.55         |
| $\pi$ C1'C2'    | $\sigma^*$ C3H3          | 4.73          |
| $\pi$ C1'C2'    | $\sigma^*$ CH i-Pr       | 2.26          |
| n O2'           | $\sigma^*$ C4H4          | 5.02          |
| n O2'           | $\sigma^*$ C3H3          | 1.55          |
| n O2'           | $\sigma^*$ C2H2 $\alpha$ | 1.30          |
|                 | <b>Total</b>             | <b>19.00</b>  |

**Figure S7.** NCI analysis of (*M*)-**2b** and (*P*)-**2b** atropisomers implied in **2b** conformational equilibrium.

(*M*)-**2b**

---

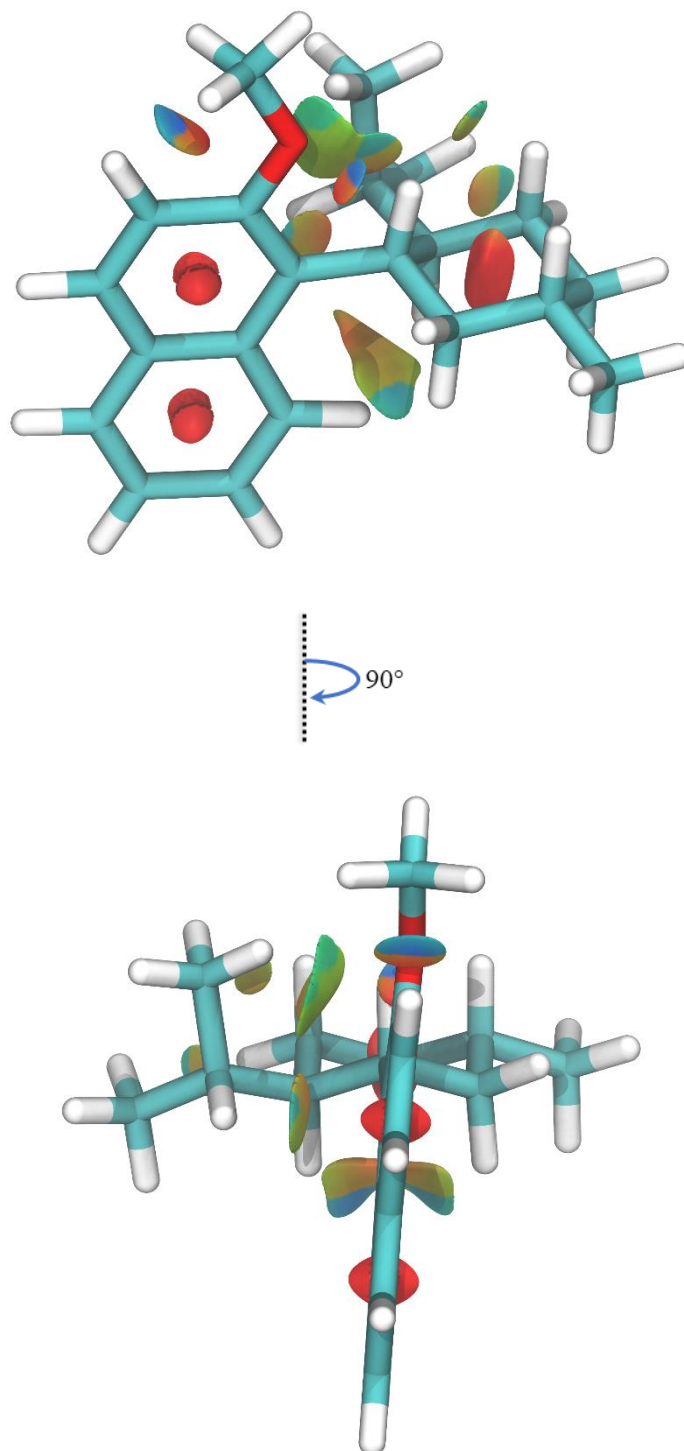

(P)-2b

---

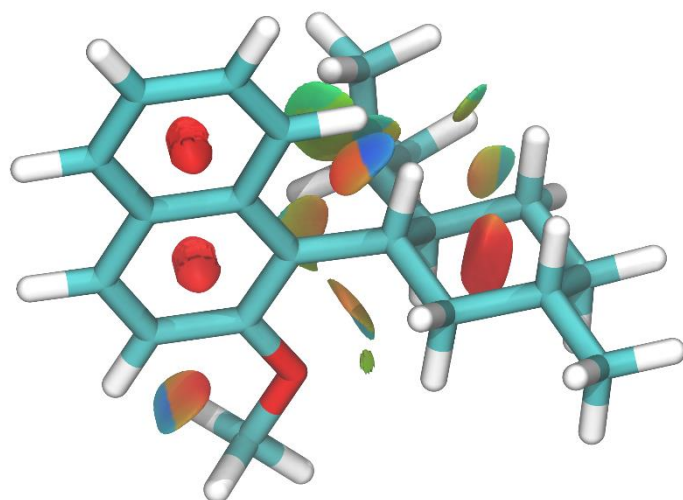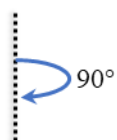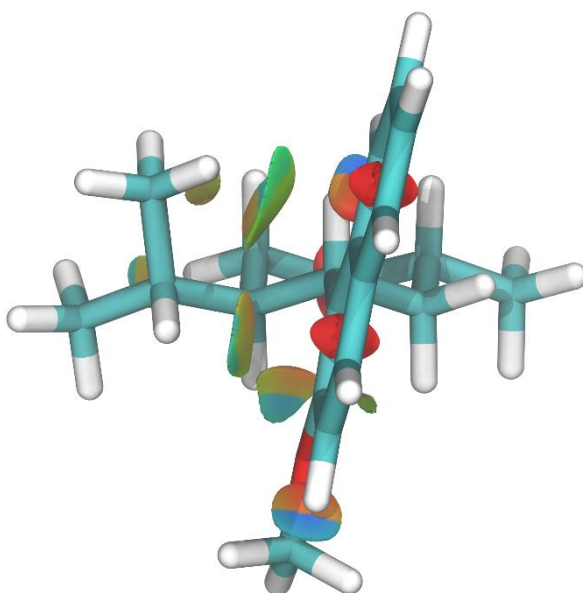

**Figure S8.** Plots of RDG vs  $\text{sign}(\lambda_2)\rho$  of (*M*)-**2b** and (*P*)-**2b** atropisomers and quantitative analysis in the attractive ( $\text{sign}(\lambda_2)\rho < 0$ ), VDW ( $\text{sign}(\lambda_2)\rho \approx 0$ ) and repulsive regions ( $\text{sign}(\lambda_2)\rho > 0$ ).

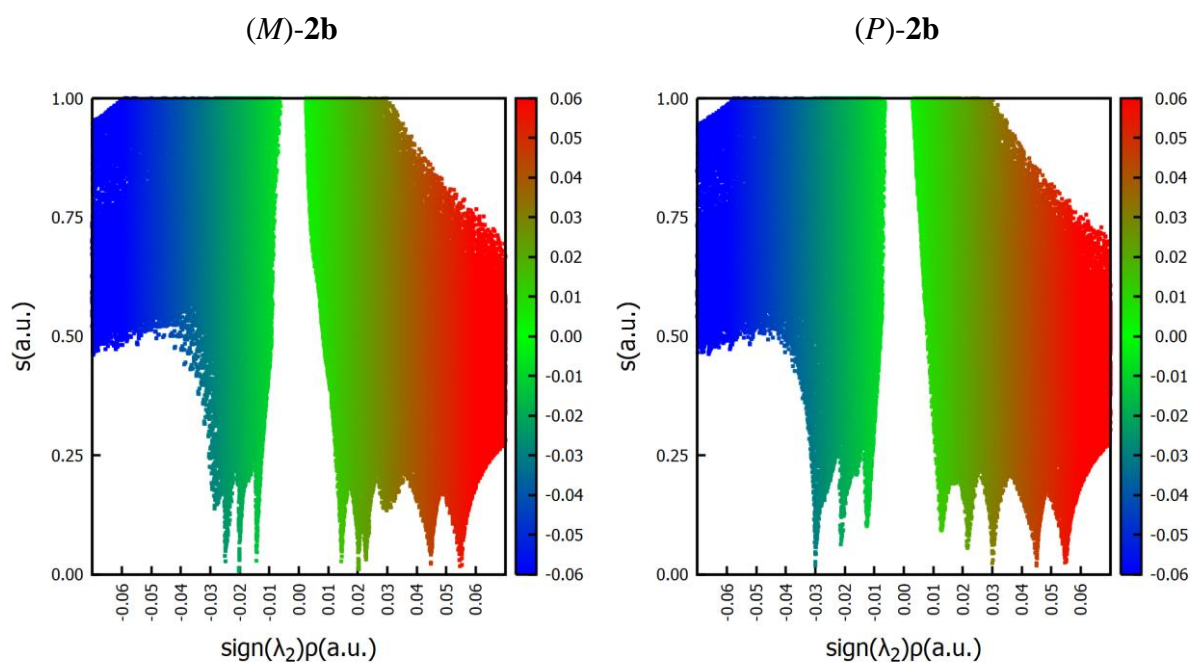

|                                  | <i>Attractive region</i> | <i>VDW region</i> | <i>Repulsive region</i> |
|----------------------------------|--------------------------|-------------------|-------------------------|
| ( <i>M</i> )- <b>2b</b>          | -0.1628                  | 0.0027            | 0.2997                  |
| ( <i>P</i> )- <b>2b</b>          | -0.1625                  | 0.0027            | 0.2994                  |
| ( <i>M</i> ) versus ( <i>P</i> ) | -2.82E-04                | 8.92E-06          | 3.57E-04                |

**Figure S9.** Geometrical parameters of located transition states implied in **2b** conformational equilibrium calculated in DMSO @ the IEFPCM/M06-2X-D3/6-311+G(2d,p) level of theory.

TS1-2b

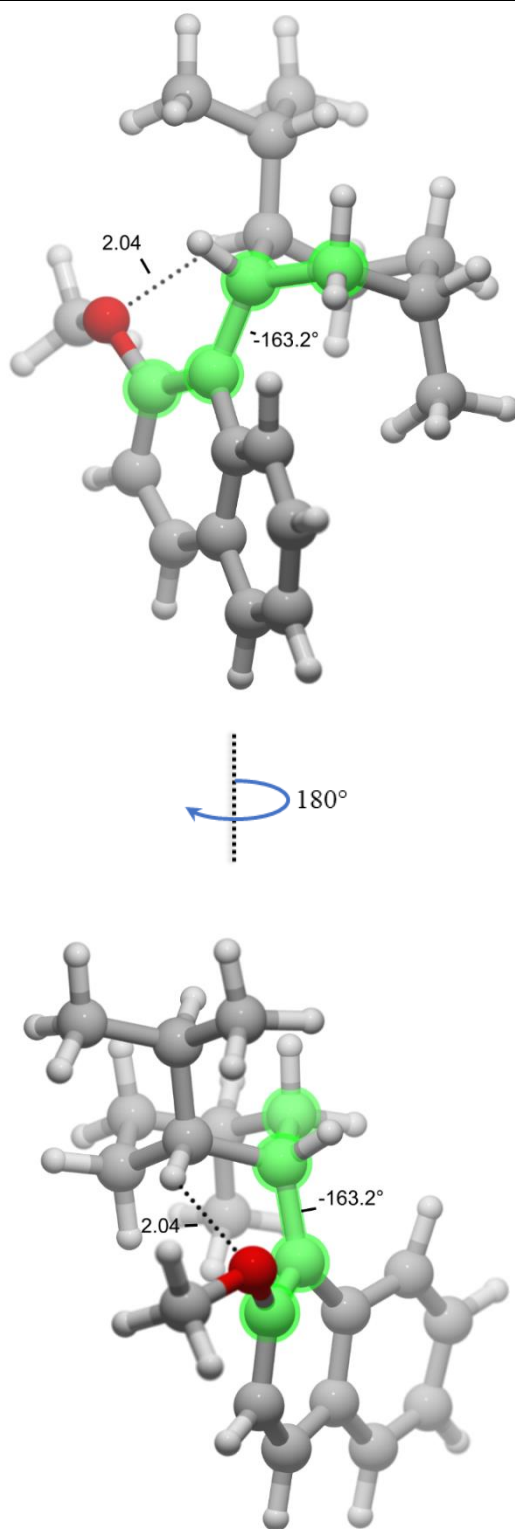

TS2-2b

---

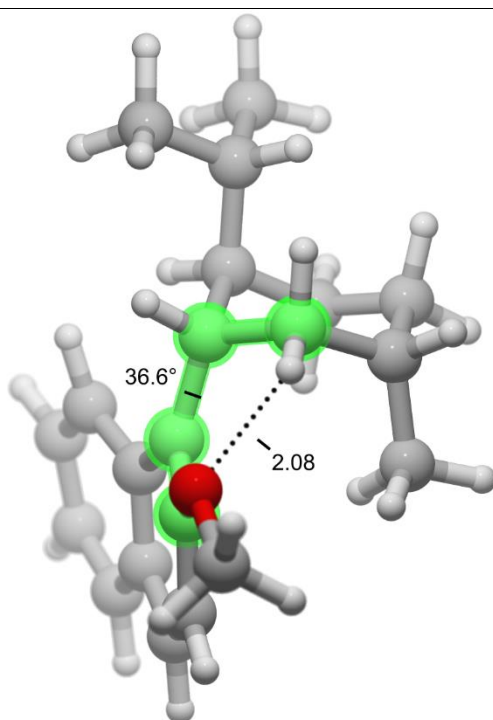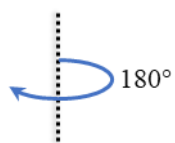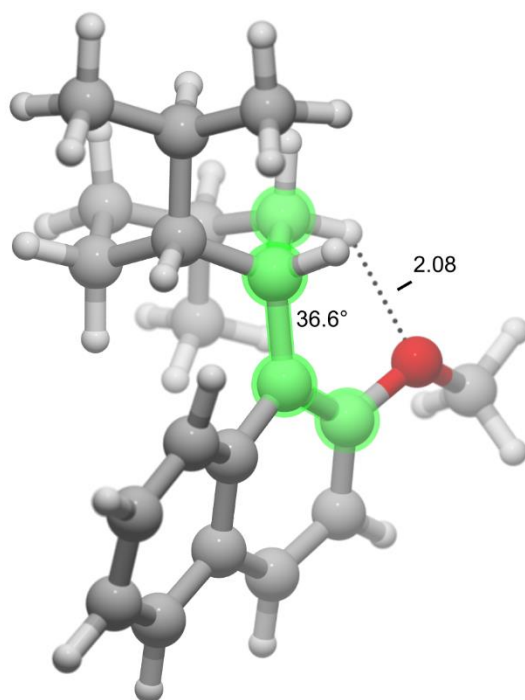

**Figure S10.** NCI analysis of located transition states implied in **2b** conformational equilibrium.

TS1-2b

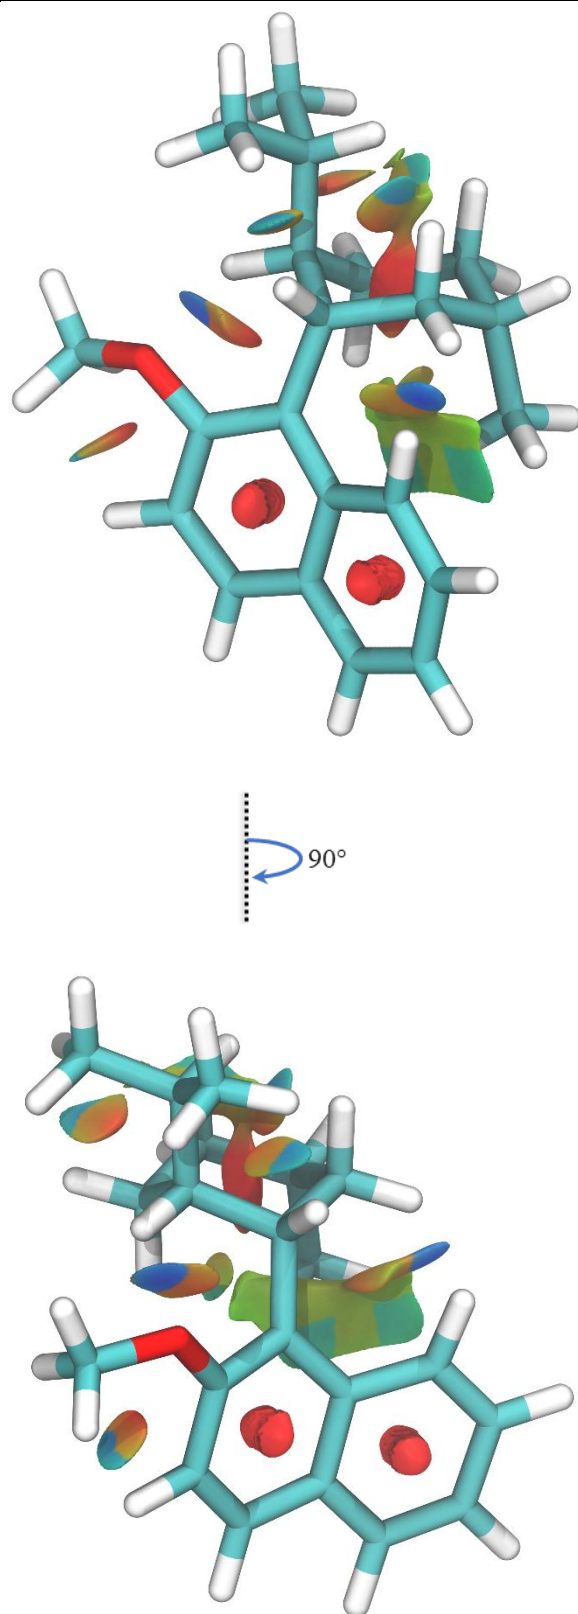



TS2-2b

---

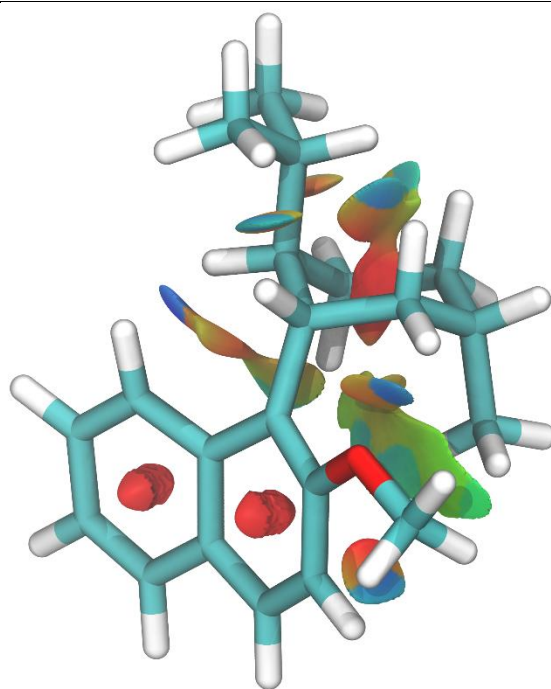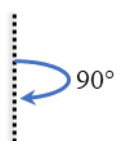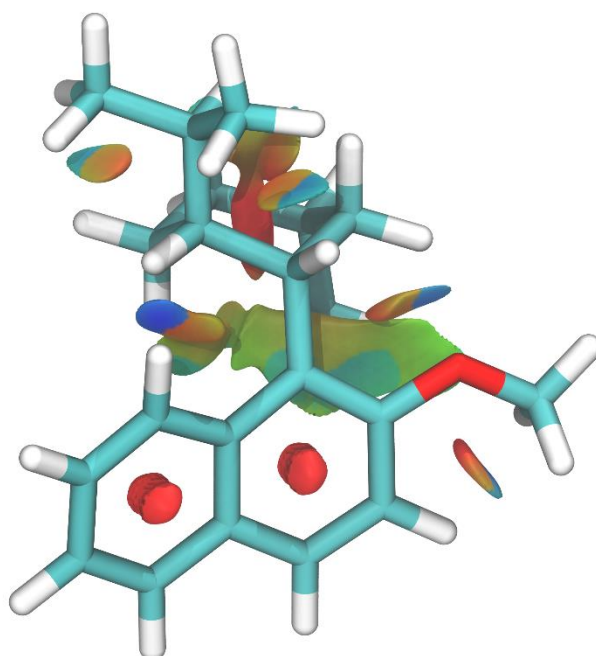

**Table S18.** Thermodynamic parameters of **2c** conformational equilibrium calculated in DMSO @ the IEFPCM/M06-2X-D3/6-311+G(2d,p) level of theory.

|                            | ( <i>M</i> )- <b>2c bis</b> | ( <i>M</i> )- <b>2c</b> | ( <i>P</i> )- <b>2c</b> | ( <i>P</i> )- <b>2cbis</b> | TS1- <b>2c</b> | TS1'- <b>2c</b> | TS2- <b>2c</b> | TS2'- <b>2c</b> |
|----------------------------|-----------------------------|-------------------------|-------------------------|----------------------------|----------------|-----------------|----------------|-----------------|
| $\Delta H^\circ$ (kJ/mol)  | 10.23                       | 7.11                    | 0.00                    | 3.27                       | 94.44          | 98.93           | 91.6           | 102.43          |
| $\Delta G^\circ$ (kJ/mol)  | 9.82                        | 3.53                    | 0.00                    | 0.82                       | 104.66         | 107.16          | 99.1           | 109.84          |
| $\Delta S^\circ$ (J/mol.K) | 1.37                        | 12.01                   | 0.00                    | 8.23                       | -34.26         | -27.61          | -25.1          | -24.86          |
| $\mu$ (Debye)              | 5.01                        | 5.06                    | 5.13                    | 5.12                       | 4.88           | 4.78            | 4.71           | 4.71            |

**Figure S11.** Geometrical parameters of (*M*)-**2c** and (*P*)-**2c** atropisomers calculated in DMSO at the IEFPCM/M06-2X-D3/6-311+G(2d,p) level of theory.

(*M*)-**2c bis**

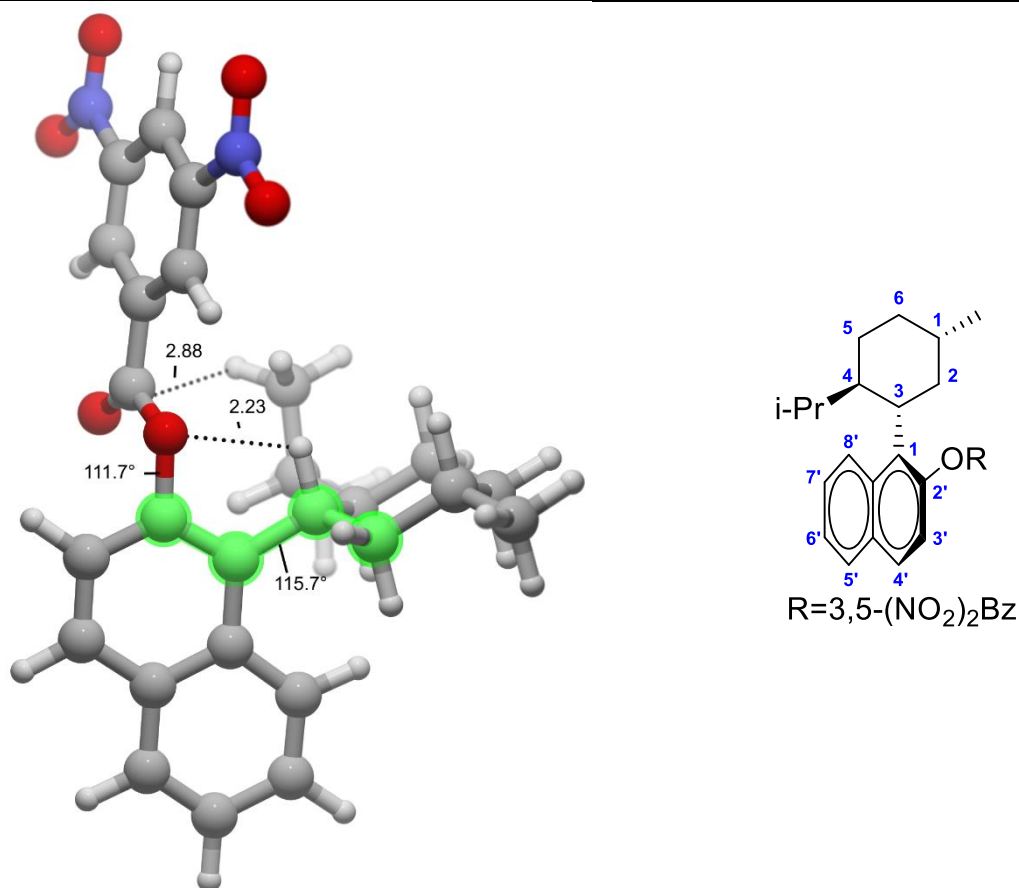

(*M*)-2c

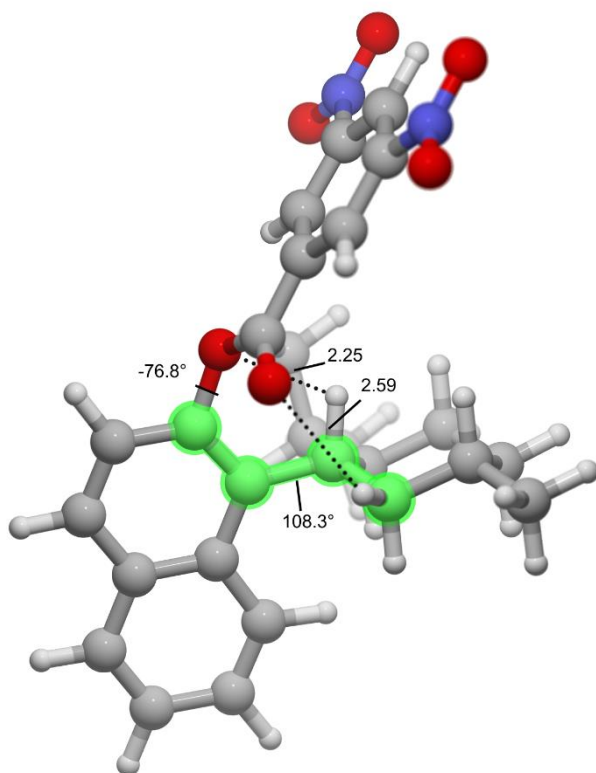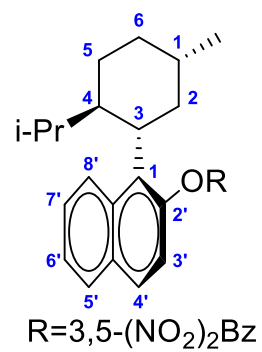

(*P*)-2c

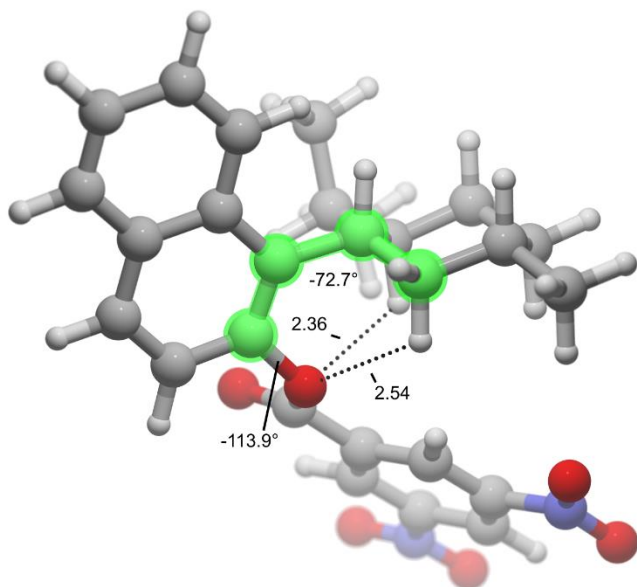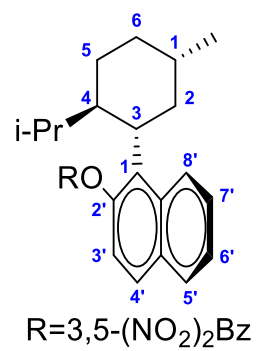

(P)-2c bis

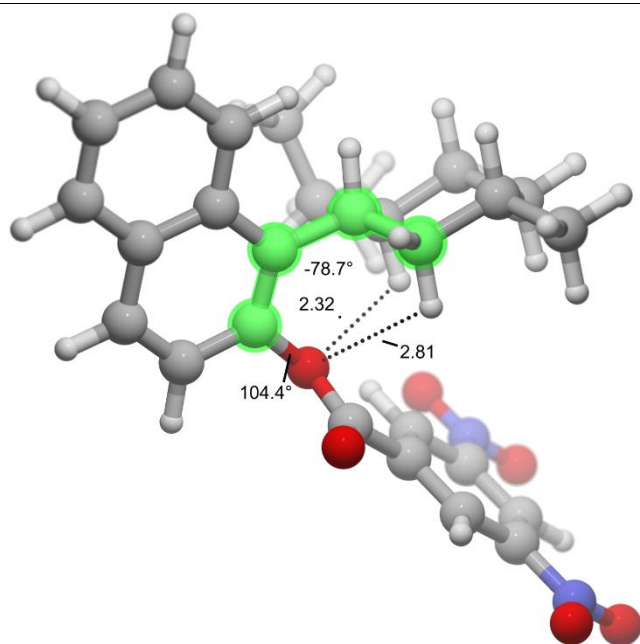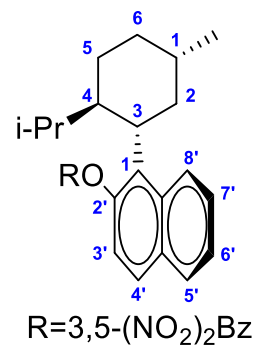

**Table S19.** NBO analysis of (*M*)-**2c** atropisomer in DMSO at the IEFPCM/M06-2X-D3/6-311+G(2d,p) of theory.

| <i>Donnor</i>          | <i>Acceptor</i>          | <i>Energy</i> |
|------------------------|--------------------------|---------------|
| $\sigma$ C8'H8'        | $\sigma^*$ C4H4          | 3.01          |
| $\sigma$ C4H4          | $\sigma^*$ C8'H8'        | 3.51          |
| $\sigma$ C8'H8'        | $\sigma^*$ C2H2 $\alpha$ | 1.51          |
| $\sigma$ C2H2 $\alpha$ | $\sigma^*$ C8'H8'        | 2.43          |
| $\sigma$ C3H3          | $\pi^*$ C1'C8a'          | 25.86         |
| $\pi$ C1'C8a'          | $\sigma^*$ C3H3          | 3.81          |
| $\sigma$ CH i-Pr       | $\pi^*$ C1'C2'           | 2.09          |
| $\sigma$ C3H3          | $\pi^*$ C1''O            | 3.31          |
| $\pi$ C1''O            | $\sigma^*$ C2H2 $\beta$  | 1.55          |
| n O2'                  | $\sigma^*$ C3H3          | 2.85          |
|                        | <b>Total</b>             | <b>49.92</b>  |

**Table S20.** NBO analysis of (*P*)-**2c** atropisomer in DMSO at the IEFPCM/M06-2X-D3/6-311+G(2d,p) level of theory.

| <i>Donnor</i>               | <i>Acceptor</i>          | <i>Energy</i> |
|-----------------------------|--------------------------|---------------|
| $\sigma$ C8'H8'             | $\sigma^*$ C3H3          | 5.90          |
| $\sigma$ C3H3               | $\sigma^*$ C8'H8'        | 2.13          |
| $\sigma$ C3H3               | $\pi^*$ C1'C2'           | 21.80         |
| $\pi$ C1'C2'                | $\sigma^*$ C3H3          | 4.27          |
| $\sigma$ CH Me $\beta$ i-Pr | $\pi^*$ C7'C8'           | 1.51          |
| $\pi$ C1'C2'                | $\sigma^*$ CH i-Pr       | 2.80          |
| $\sigma$ C4H4               | $\pi^*$ C1''O            | 1.92          |
| $\pi$ C1''O                 | $\sigma^*$ CH i-Pr       | 1.59          |
| n O2'                       | $\sigma^*$ C4H4          | 1.34          |
| n O2'                       | $\sigma^*$ C2H2 $\alpha$ | 1.92          |
|                             | <b>Total</b>             | <b>51.17</b>  |

**Figure S12.** NCI analysis of (*M*)-**2c** and (*P*)-**2c** atropisomers implied in **2c** conformational equilibrium.

(*M*)-**2c**

---

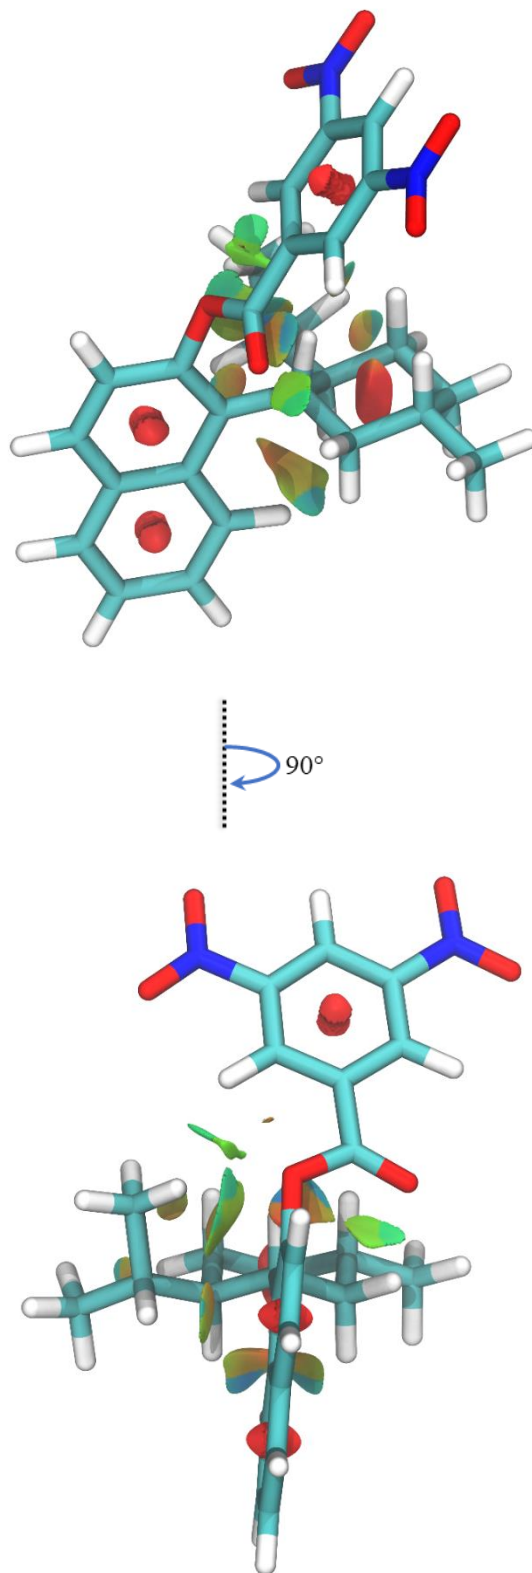

(P)-2c

---

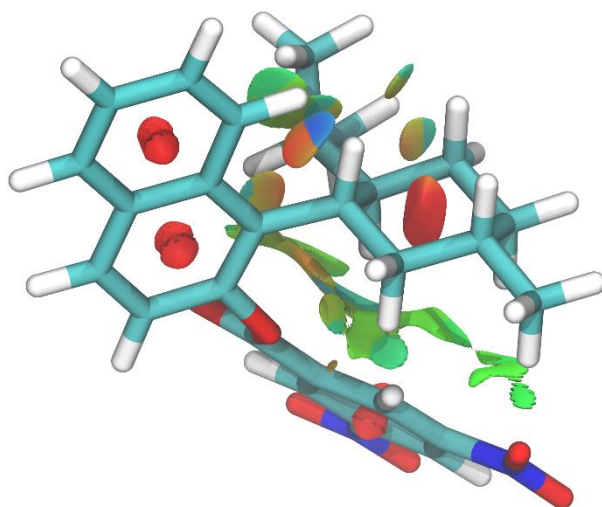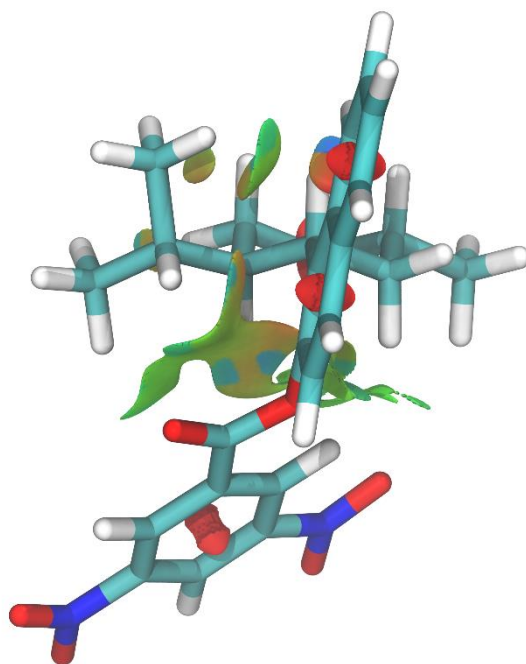

**Figure S13.** Plots of RDG vs  $\text{sign}(\lambda_2)\rho$  of (*M*)-**2c** and (*P*)-**2c** atropisomers and quantitative analysis in the attractive ( $\text{sign}(\lambda_2)\rho < 0$ ), VDW ( $\text{sign}(\lambda_2)\rho \approx 0$ ) and repulsive regions ( $\text{sign}(\lambda_2)\rho > 0$ ).

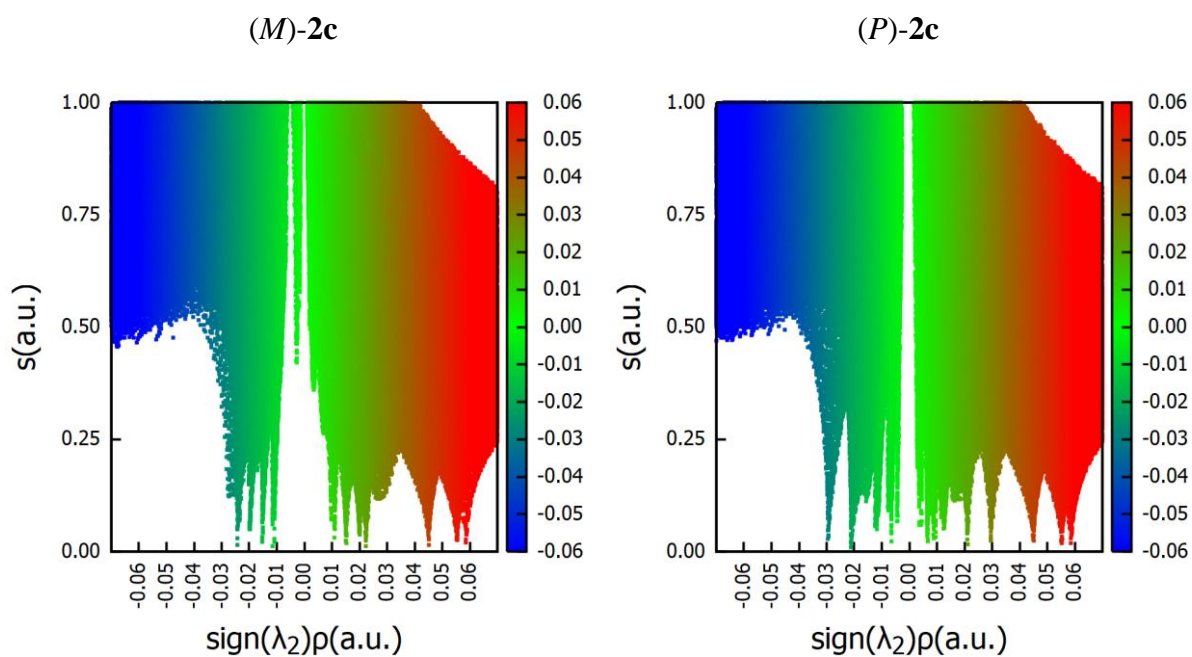

|                                  | <i>Attractive region</i> | <i>VDW region</i> | <i>Repulsive region</i> |
|----------------------------------|--------------------------|-------------------|-------------------------|
| ( <i>M</i> )- <b>2c</b>          | -0.2108                  | 0.0035            | 0.3841                  |
| ( <i>P</i> )- <b>2c</b>          | -0.2119                  | 0.0035            | 0.3841                  |
| ( <i>M</i> ) versus ( <i>P</i> ) | 1.06E-03                 | -6.43E-06         | 2.63E-05                |



**Figure S14.** Geometrical parameters of located transition states implied in **2c** conformational equilibrium calculated in DMSO at the IEFPCM/M06-2X-D3/6-311+G(2d,p) level of theory.

TS1-**2c**

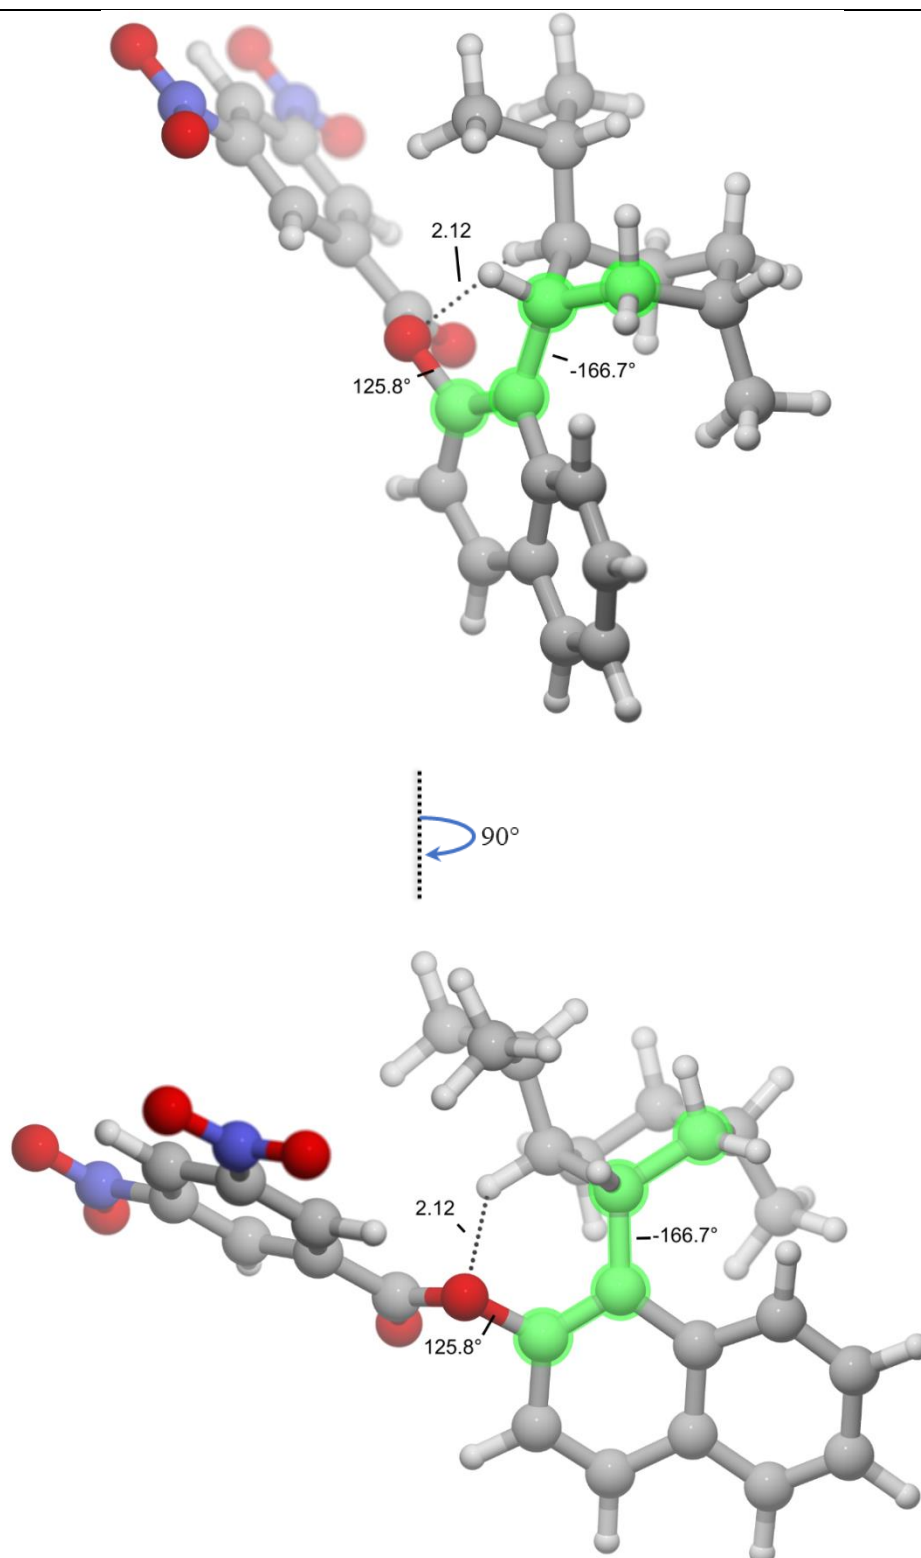

TS1'-2c

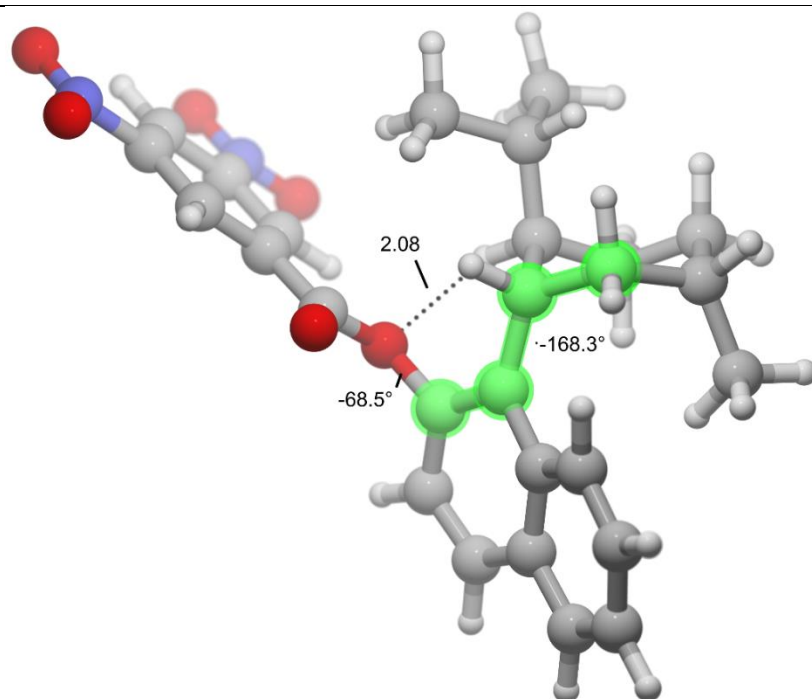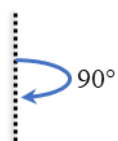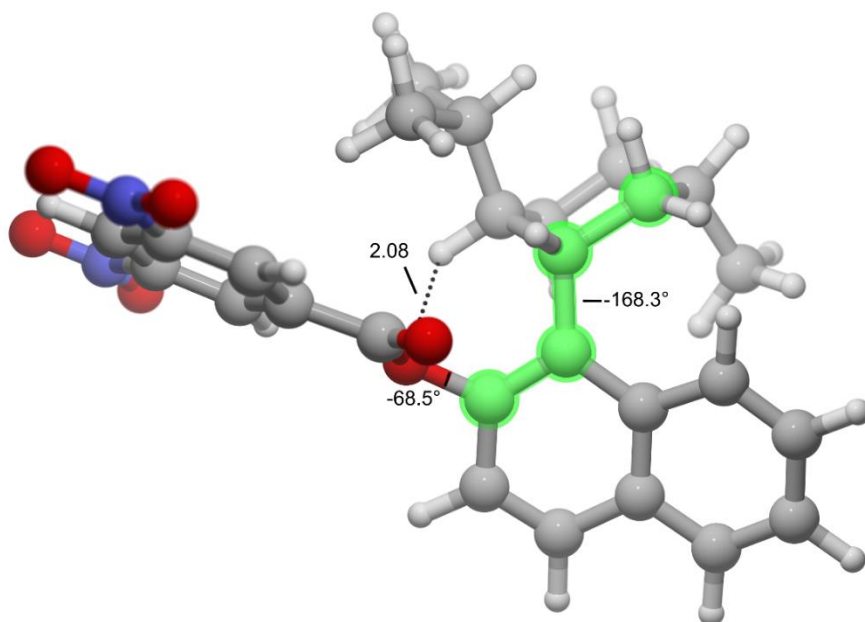

TS2-2c

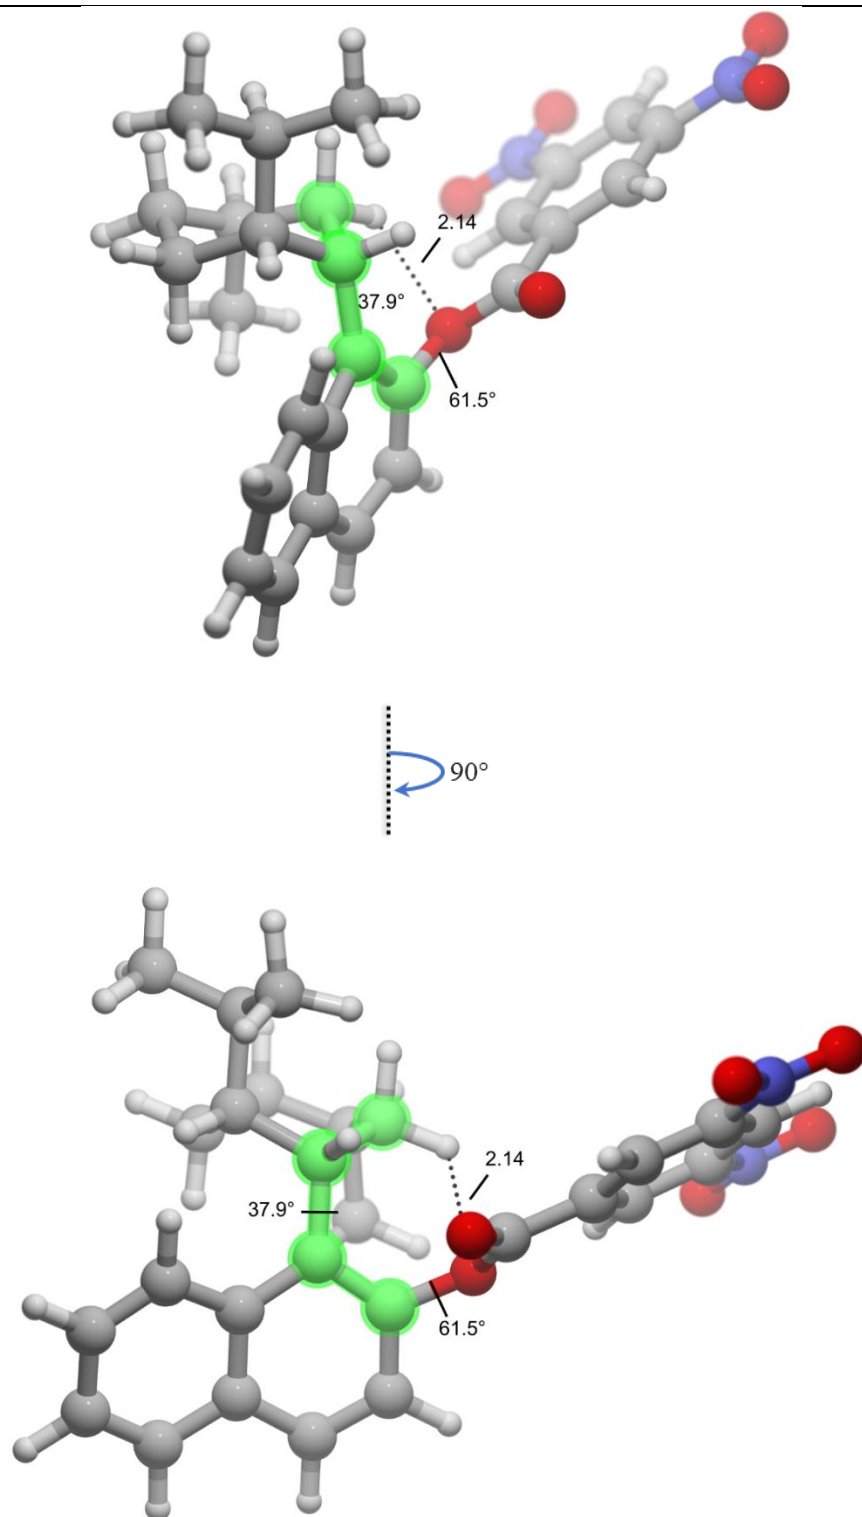

TS2'-2c

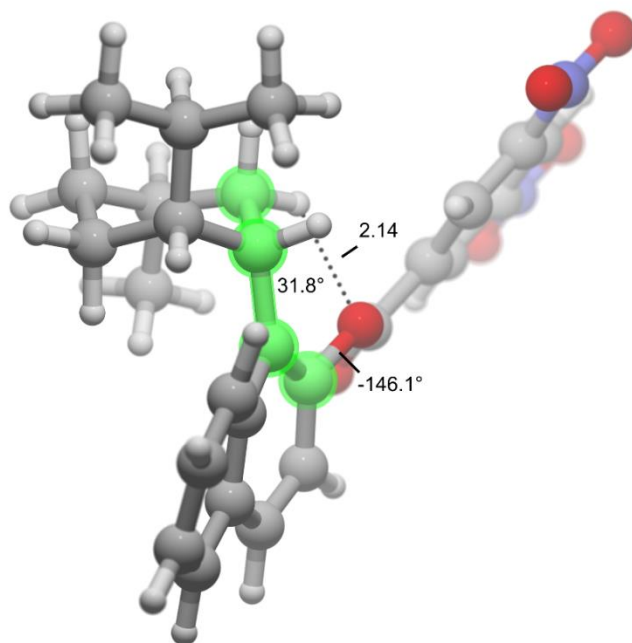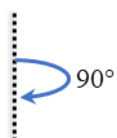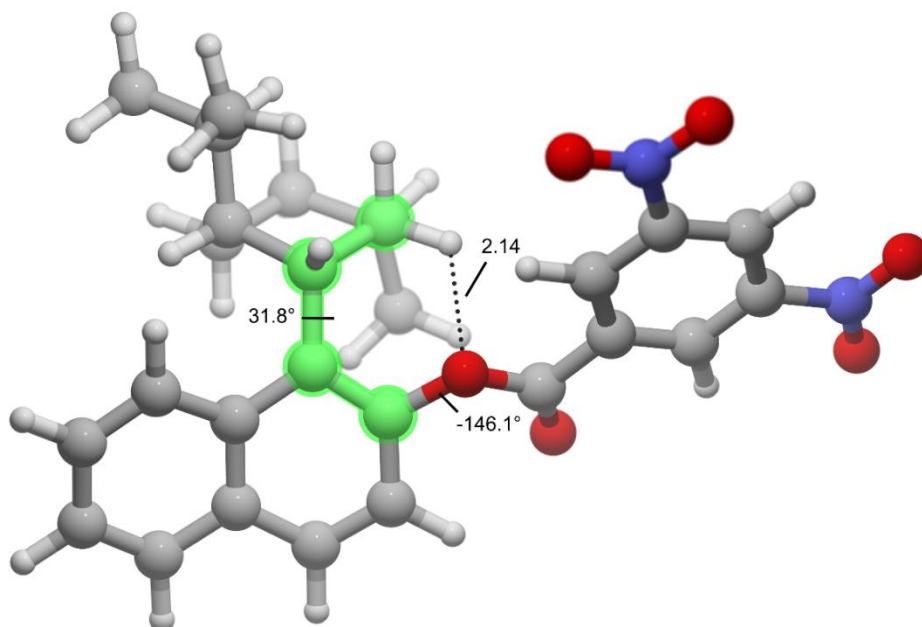

**Figure S15.** NCI analysis of located transition states implied in **2c** conformational equilibrium.

TS1-2c

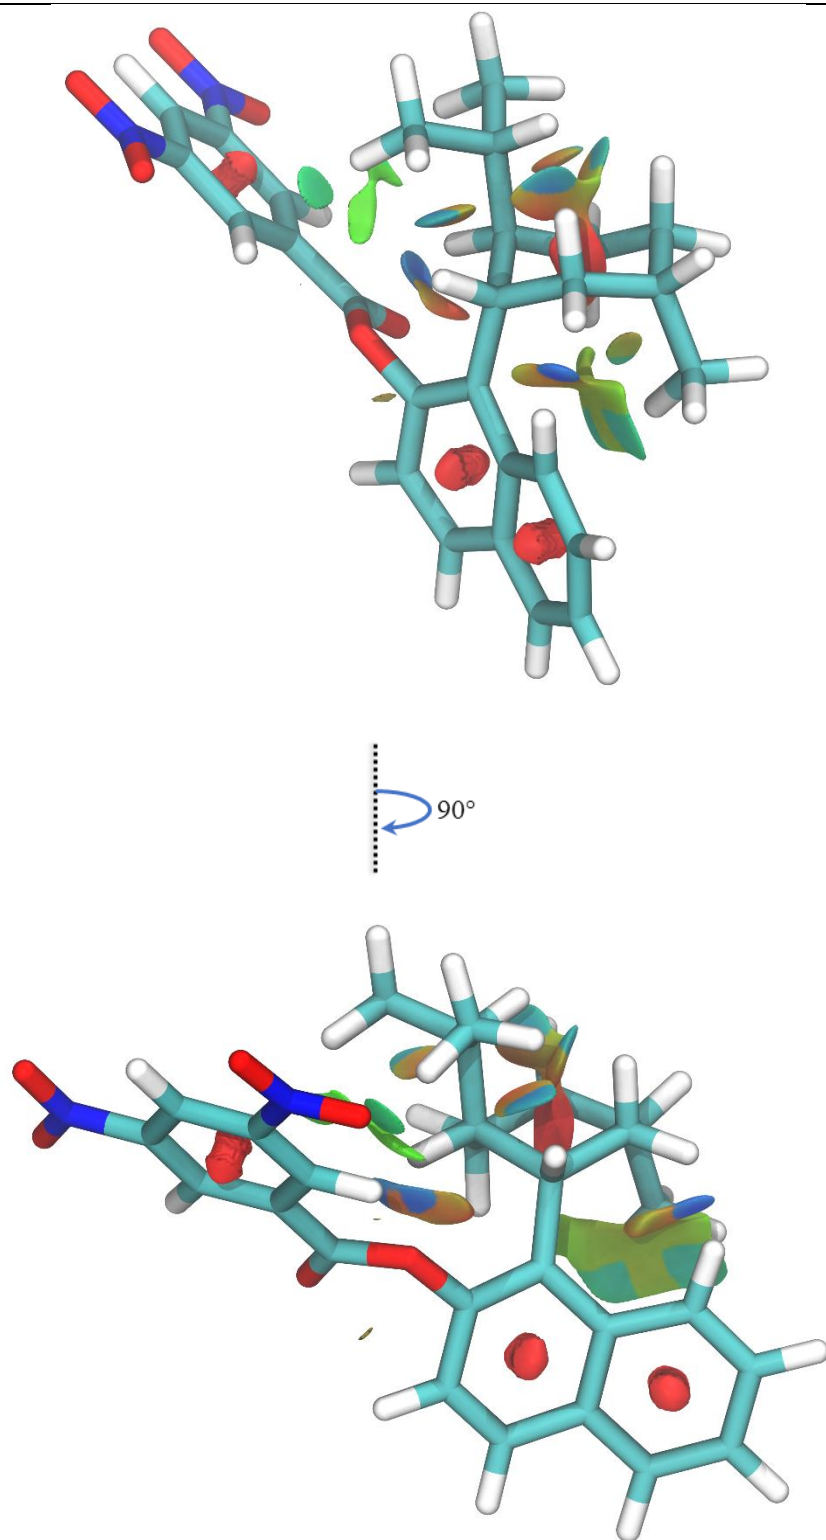

TS1'-2c

---

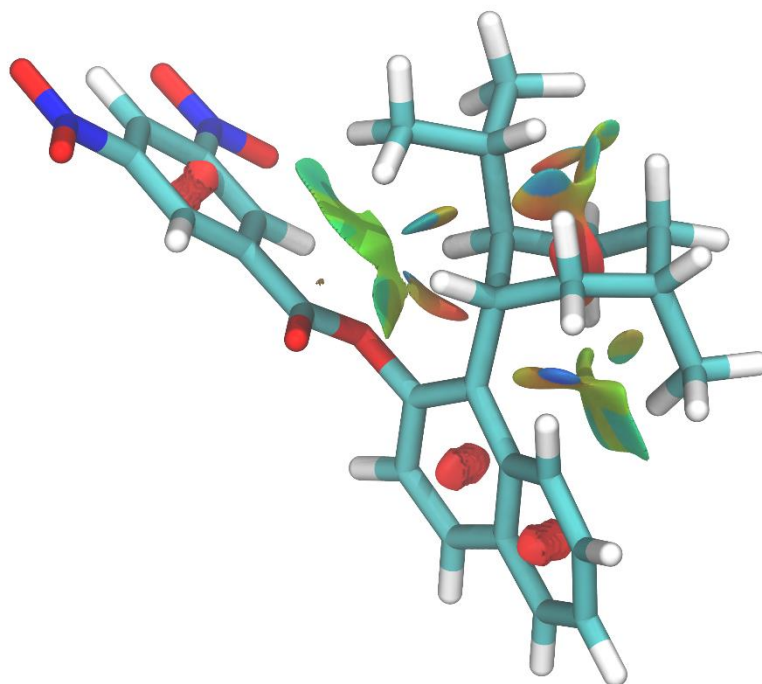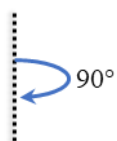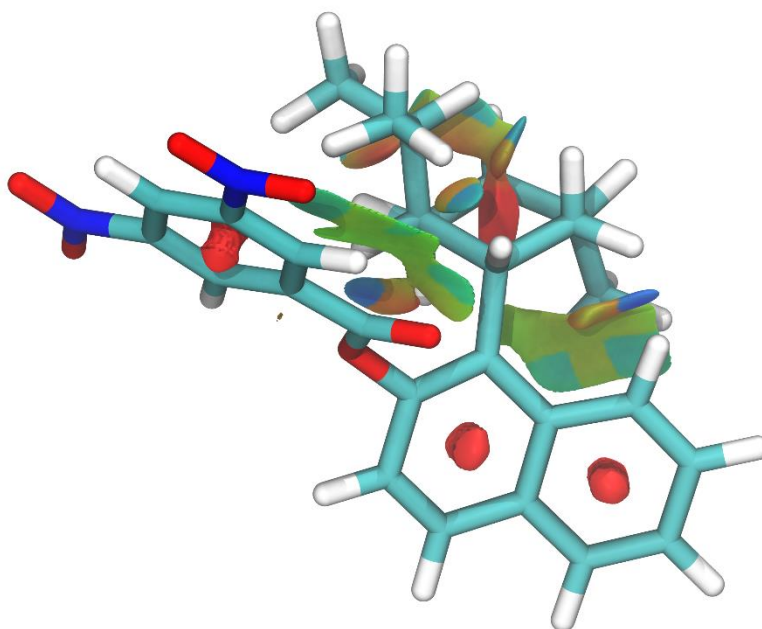

TS2-2c

---

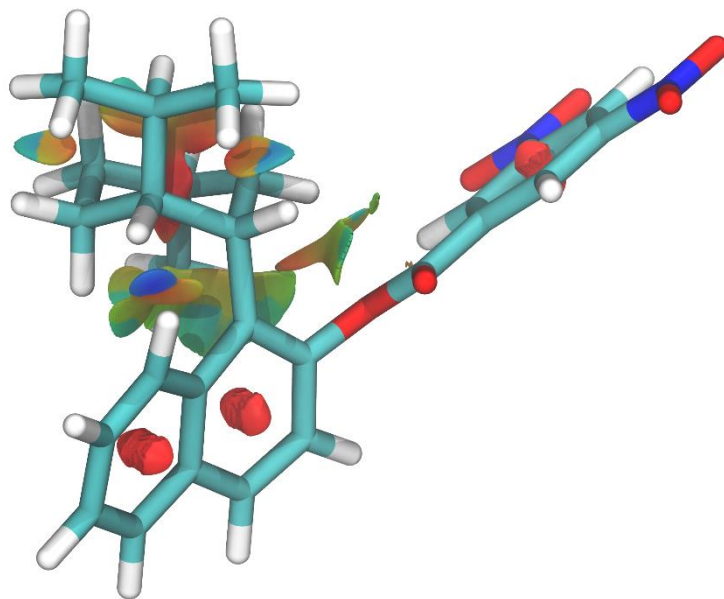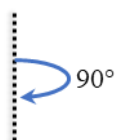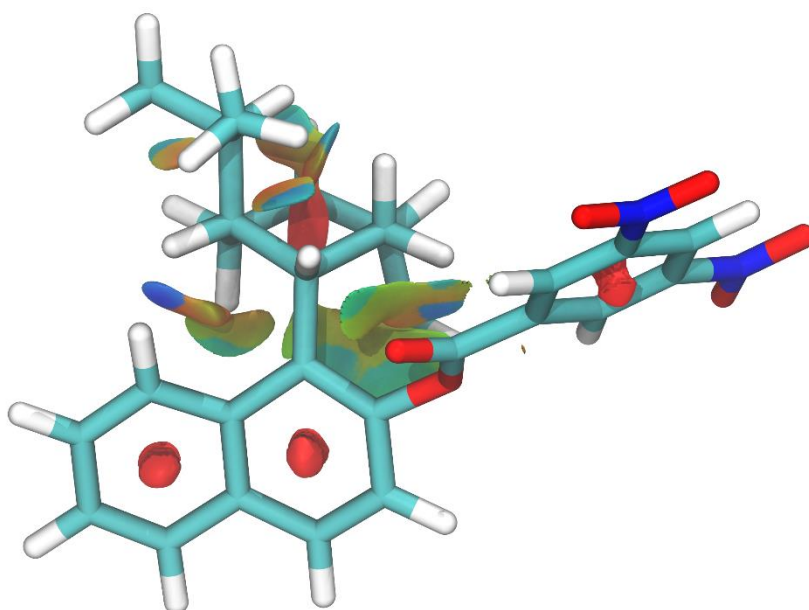



TS2'-2c

---

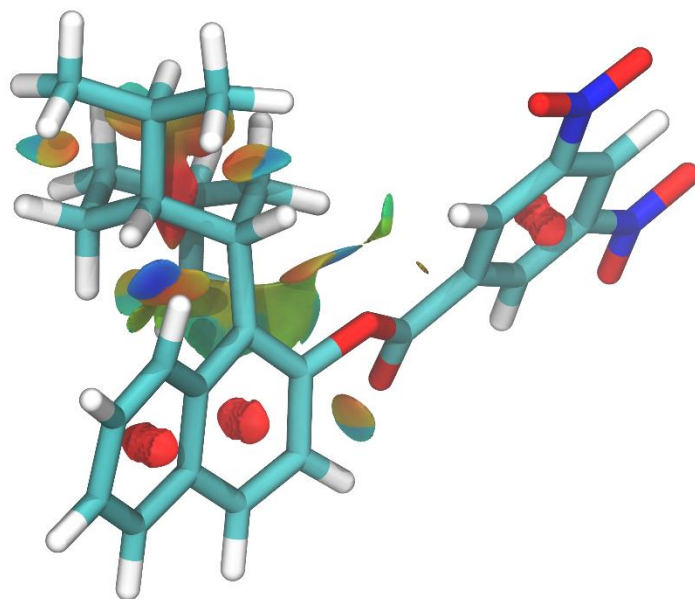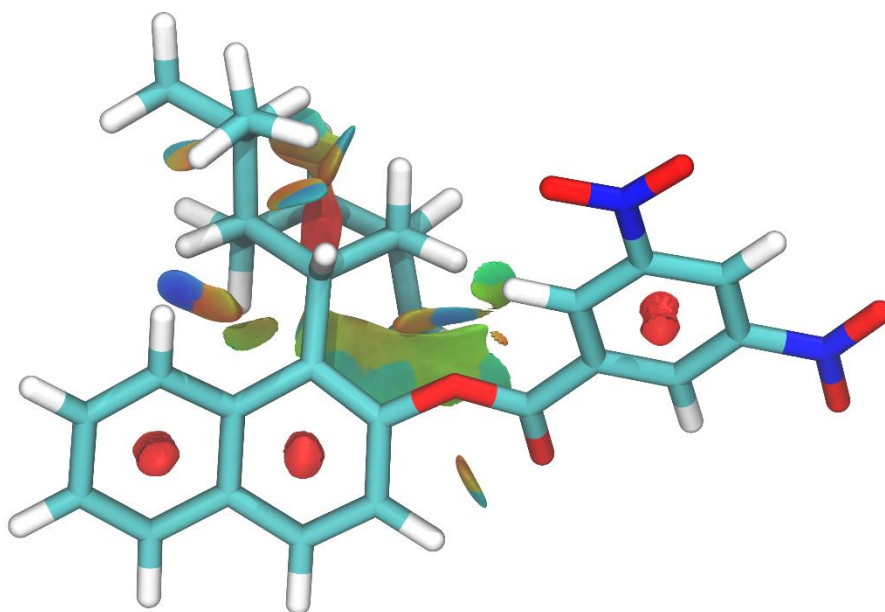



**Table S21.** Thermodynamic parameters of **3b** conformational equilibrium calculated in DMSO at the IEFPCM/M06-2X-D3/6-311+G(2d,p) level of theory.

|                            | ( <i>M</i> )- <b>3b</b> | ( <i>P</i> )- <b>3b</b> | TS1- <b>3b</b> | TS2- <b>3b</b> |
|----------------------------|-------------------------|-------------------------|----------------|----------------|
| $\Delta H^\circ$ (kJ/mol)  | 1.88                    | 0.00                    | 92.1           | 93.6           |
| $\Delta G^\circ$ (kJ/mol)  | 2.43                    | 0.00                    | 99.7           | 102.2          |
| $\Delta S^\circ$ (J/mol.K) | -1.85                   | 0.00                    | -25.2          | -29.1          |
| $\mu$ (Debye)              | 4.89                    | 3.10                    | 3.62           | 3.66           |

**Figure S16.** Geometrical parameters of (*M*)-**3b** and (*P*)-**3b** atropisomers calculated in DMSO @ the IEFPCM/M06-2X-D3/6-311+G(2d,p) level of theory.

(*M*)-**3b**

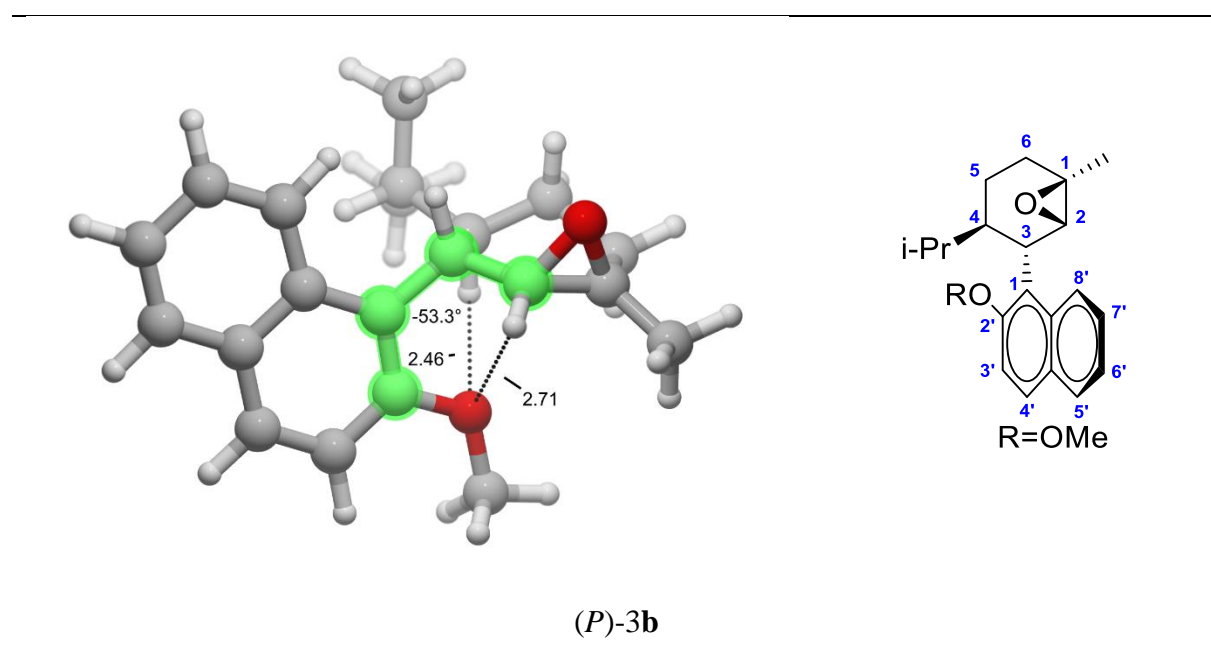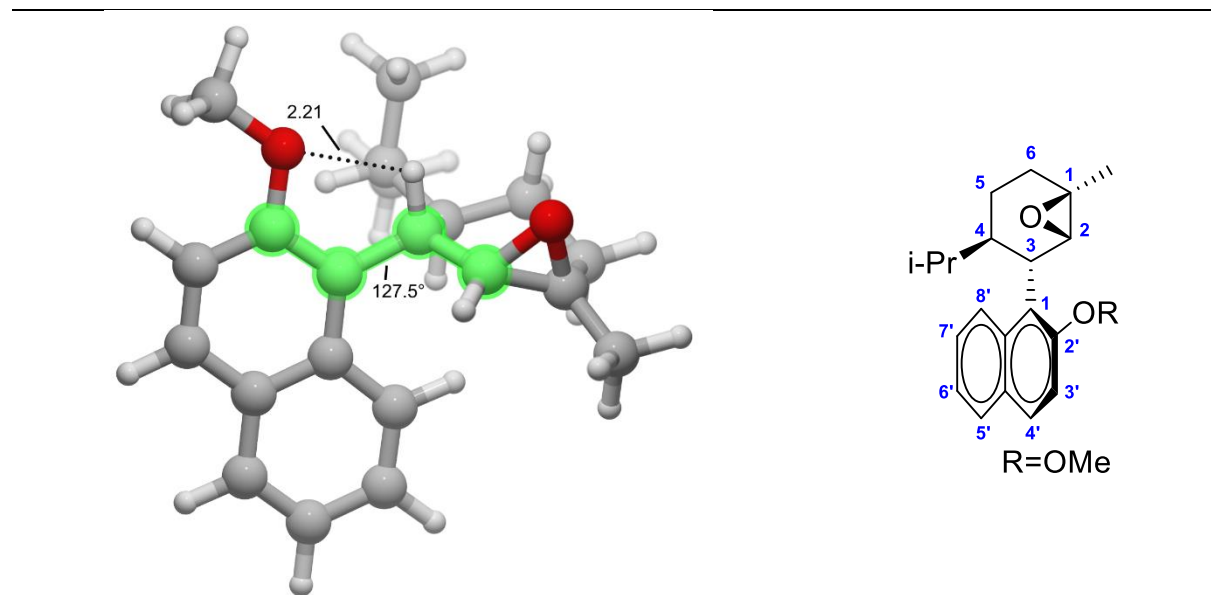

**Table S22.** NBO analysis of (*M*)-**3b** atropisomer in DMSO at the IEFPCM/M06-2X-D3/6-311+G(2d,p) level of theory.

| <i>Donnor</i>               | <i>Acceptor</i>   | <i>Energy</i> |
|-----------------------------|-------------------|---------------|
| $\sigma$ C8'H8'             | $\sigma^*$ C3H3   | 3.31          |
| $\sigma$ C3H3               | $\sigma^*$ C8'H8' | 2.64          |
| $\sigma$ CH Me $\beta$ i-Pr | $\sigma^*$ C8'H8' | 1.55          |
| $\sigma$ C3H3               | $\pi^*$ C1'C2'    | 19.66         |
| $\pi$ C1'C2'                | $\sigma^*$ C3H3   | 5.40          |
| n O2'                       | $\sigma^*$ C3H3   | 1.88          |
| n O2'                       | $\sigma^*$ C4H4   | 3.43          |
| n O2'                       | $\sigma^*$ C2O1   | 7.45          |
|                             | <b>Total</b>      | <b>39.71</b>  |

**Table S23.** NBO analysis of (*P*)-**3b** atropisomer in DMSO at the IEFPCM/M06-2X-D3/6-311+G(2d,p) level of theory.

| <i>Donnor</i>   | <i>Acceptor</i>    | <i>Energy</i> |
|-----------------|--------------------|---------------|
| $\sigma$ C8'H8' | $\sigma^*$ C2O1    | 3.43          |
| $\sigma$ C3H3   | $\pi^*$ C1'C8a'    | 22.84         |
| $\pi$ C1'C8a'   | $\sigma^*$ C3H3    | 4.56          |
| $\pi$ C1'C2'    | $\sigma^*$ CH i-Pr | 2.97          |
| n O2'           | $\sigma^*$ C3H3    | 5.98          |
|                 | <b>Total</b>       | <b>39.79</b>  |

**Figure S17.** NCI analysis of (*M*)-**3b** and (*P*)-**3b** atropisomers implied in **3b** conformational equilibrium.

(*M*)-**3b**

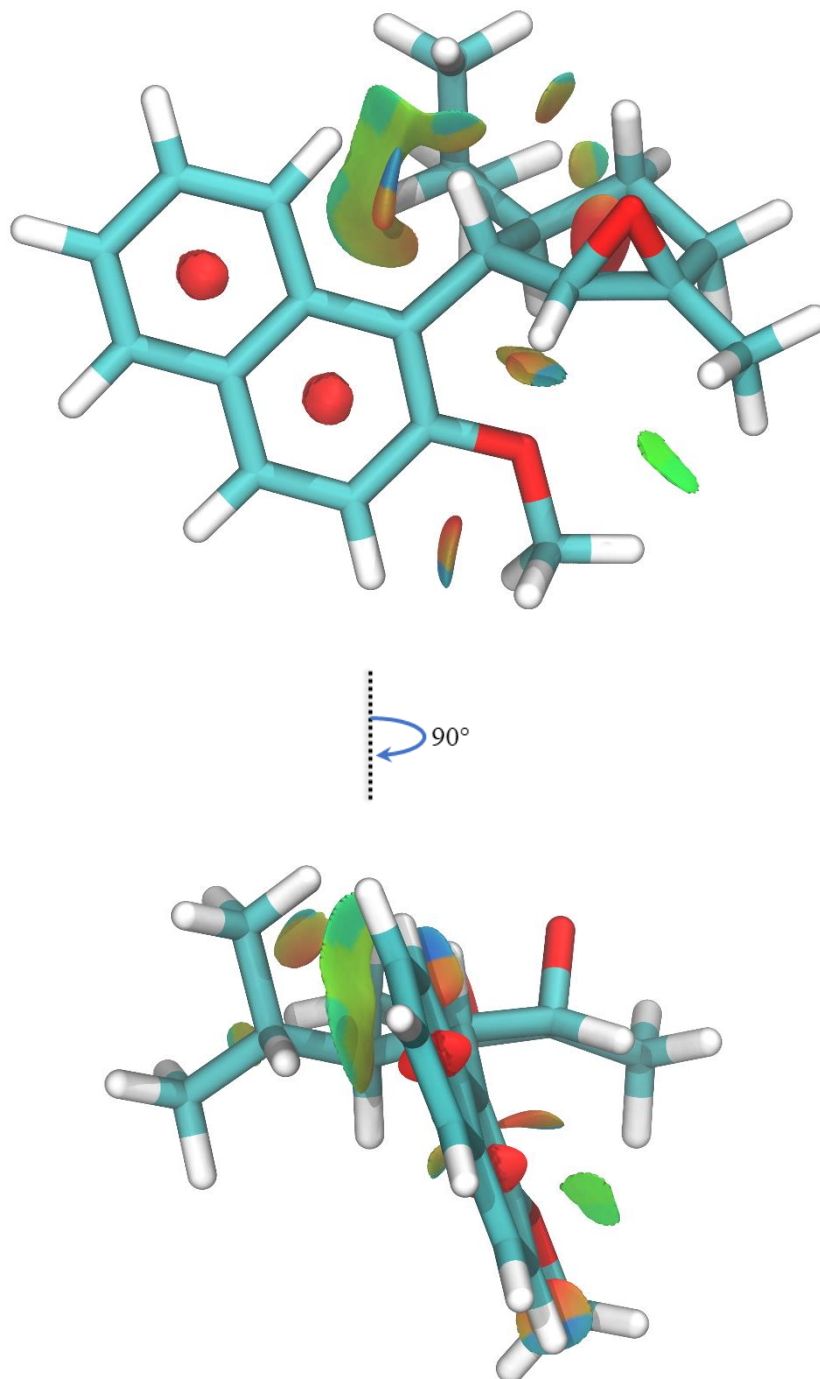

*(P)*-3b

---

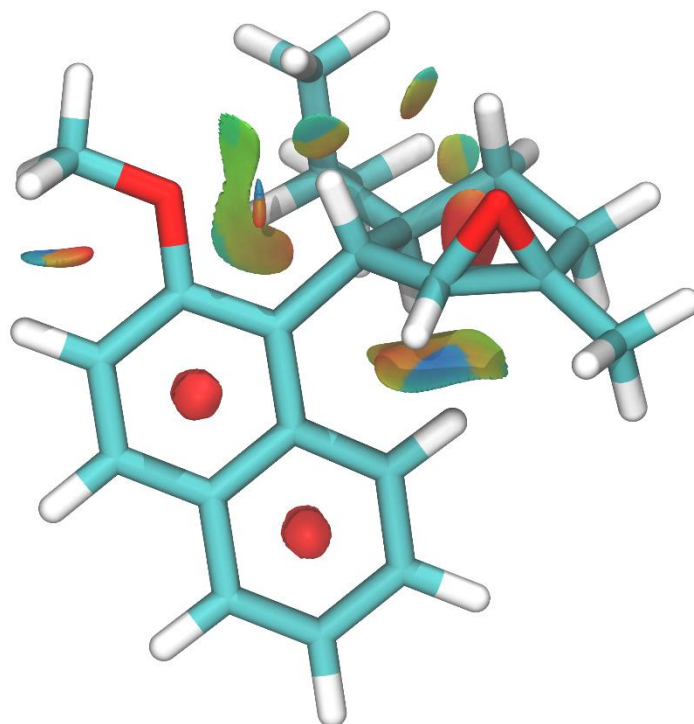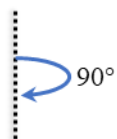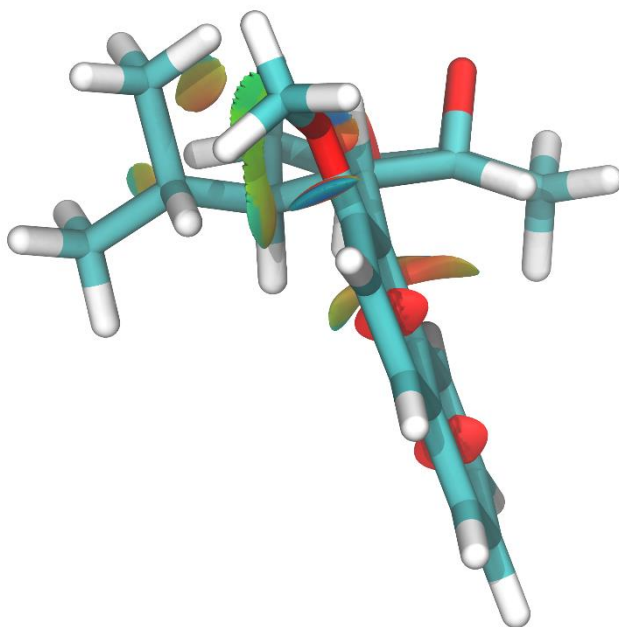

**Figure S18.** Plots of RDG vs  $\text{sign}(\lambda_2)\rho$  of (*M*)-**3b** and (*P*)-**3b** atropisomers and quantitative analysis in the attractive ( $\text{sign}(\lambda_2)\rho < 0$ ), VDW ( $\text{sign}(\lambda_2)\rho \approx 0$ ) and repulsive regions ( $\text{sign}(\lambda_2)\rho > 0$ ).

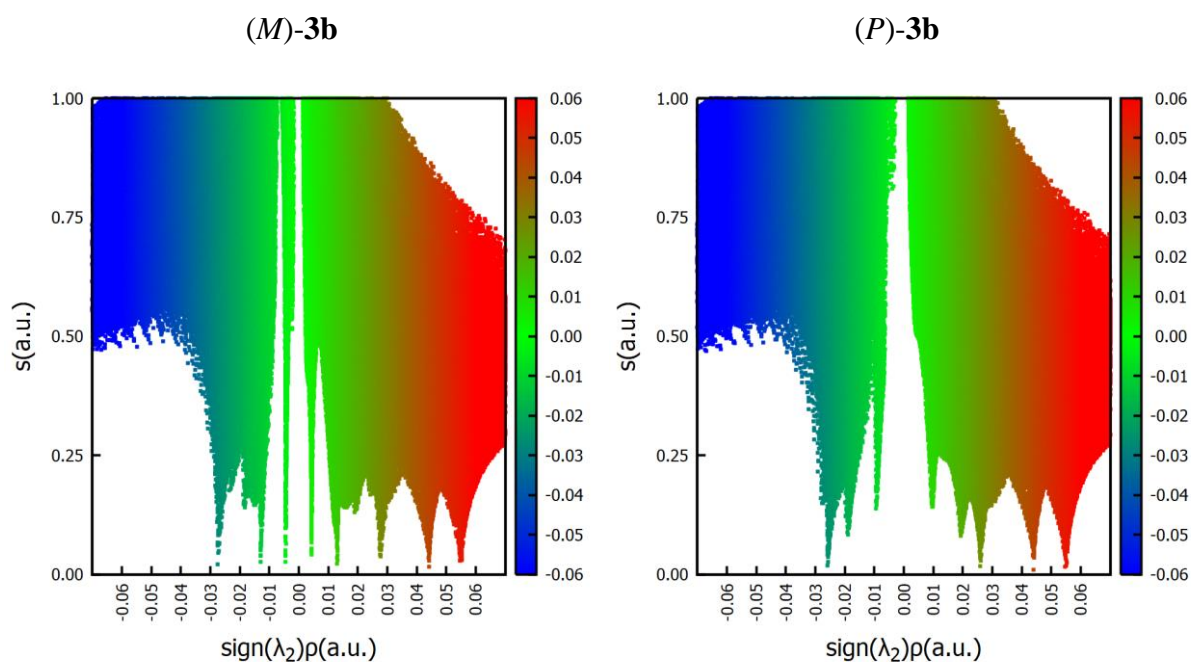

|                                  | <i>Attractive region</i> | <i>VDW region</i> | <i>Repulsive region</i> |
|----------------------------------|--------------------------|-------------------|-------------------------|
| ( <i>M</i> )- <b>3b</b>          | -0.1615                  | 0.0026            | 0.2936                  |
| ( <i>P</i> )- <b>3b</b>          | -0.1616                  | 0.0025            | 0.2942                  |
| ( <i>M</i> ) versus ( <i>P</i> ) | 1.84E-04                 | 8.43E-05          | -5.32E-04               |

**Figure S19.** Geometrical parameters of located transition states implied in **3b** conformational equilibrium calculated in DMSO at the IEFPCM/M06-2X-D3/6-311+G(2d,p) level of theory.

TS1-**3b**

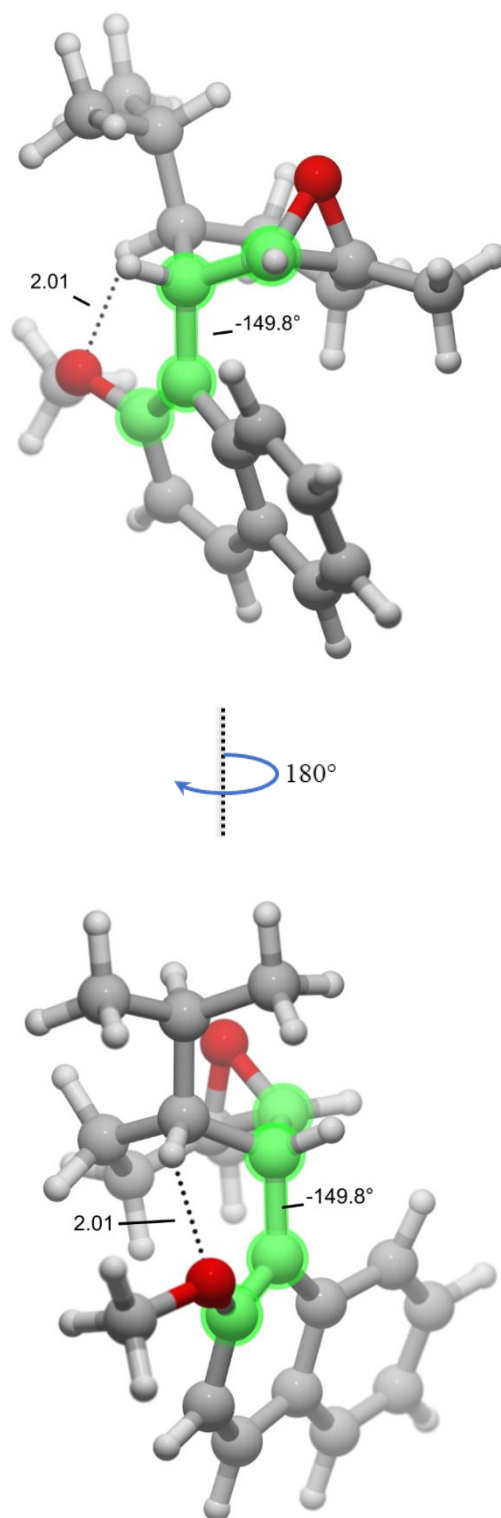

TS2-3b

---

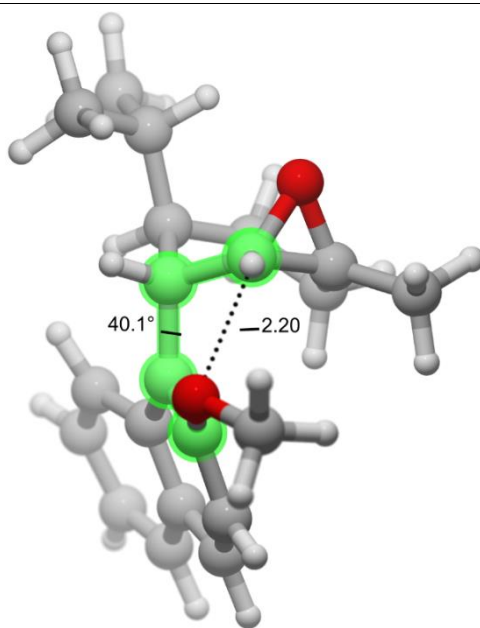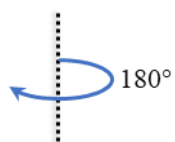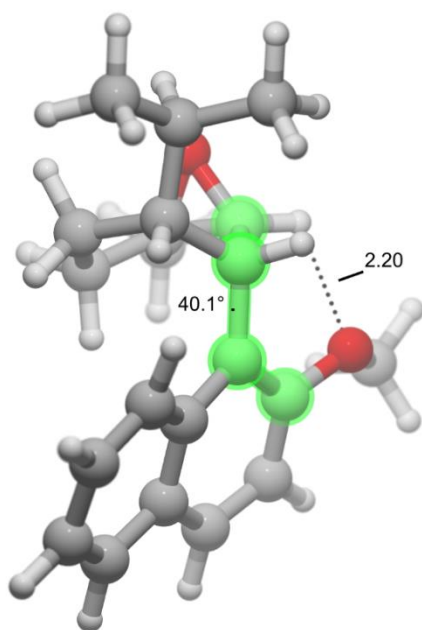

**Figure S20.** NCI analysis of located transition states implied in **3b** conformational equilibrium.

TS1-3b

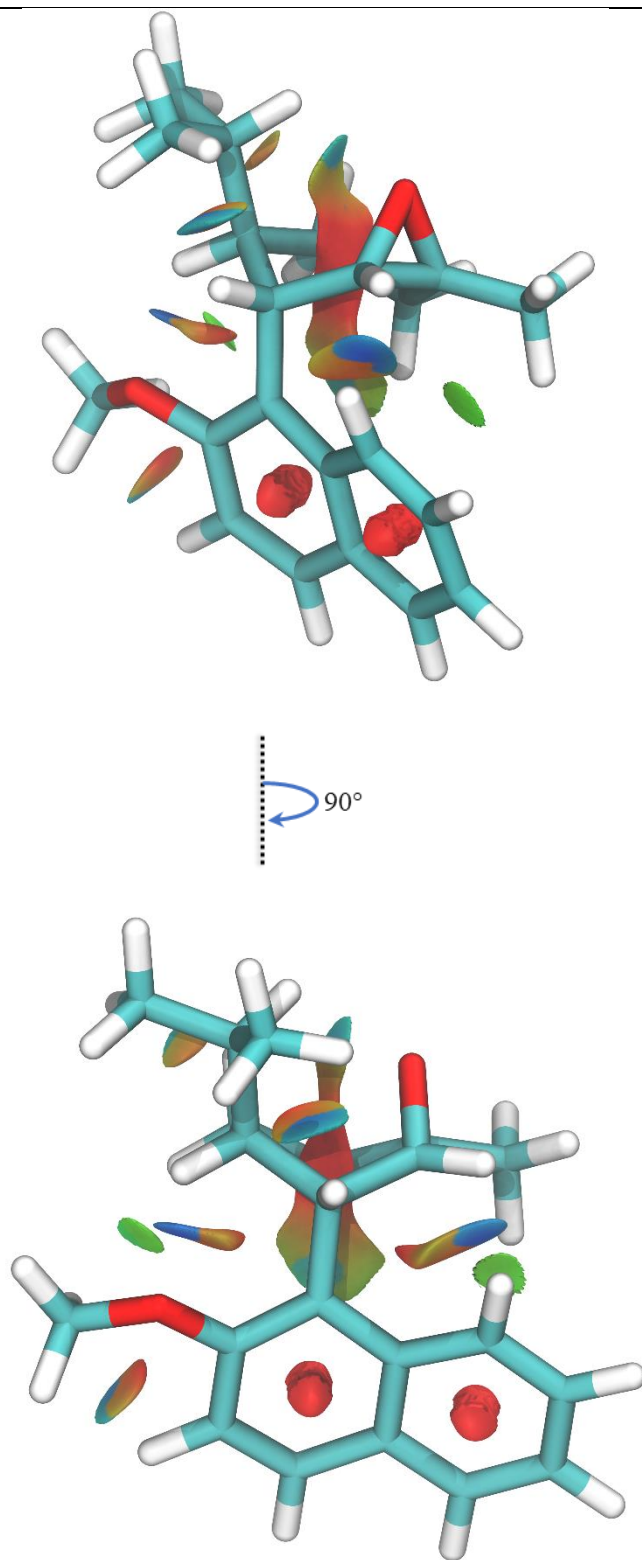



TS2-3b

---

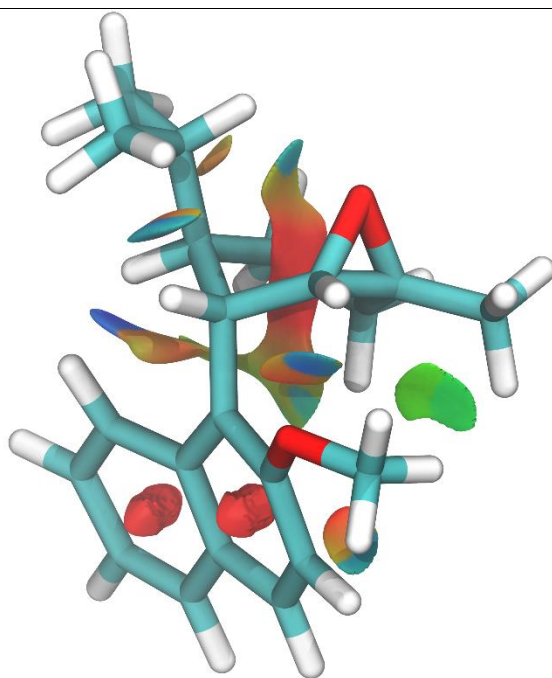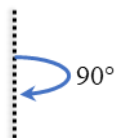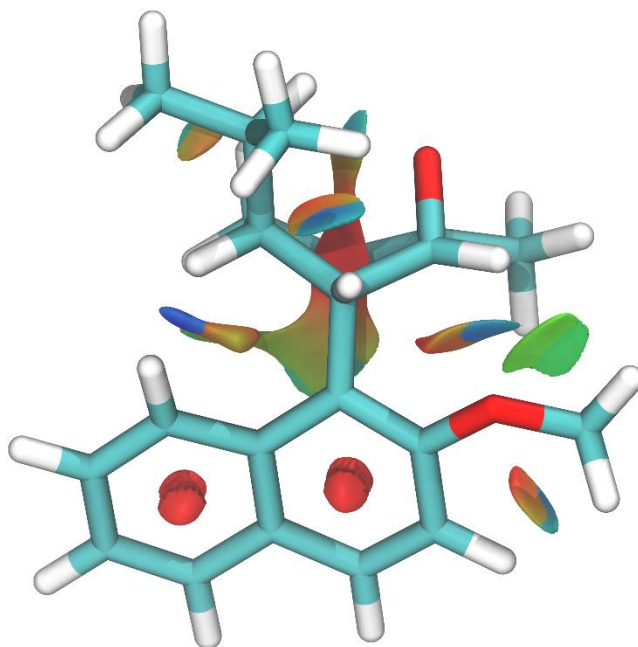

**Table S24.** Thermodynamic parameters of **3c** conformational equilibrium calculated in DMSO at the IEFPCM/M06-2X-D3/6-311+G(2d,p) level of theory.

|                            | ( <i>M</i> )- <b>3c bis</b> | ( <i>M</i> )- <b>3c</b> | ( <i>P</i> )- <b>3c</b> | ( <i>P</i> )- <b>3c bis</b> | TS1- <b>3c</b> | TS1'- <b>3c</b> | TS2- <b>3c</b> | TS2'- <b>3c</b> |
|----------------------------|-----------------------------|-------------------------|-------------------------|-----------------------------|----------------|-----------------|----------------|-----------------|
| $\Delta H^\circ$ (kJ/mol)  | 1.54                        | -2.96                   | 0.00                    | -1.30                       | 84.76          | 90.63           | 97.40          | 99.53           |
| $\Delta G^\circ$ (kJ/mol)  | 2.01                        | 2.01                    | 0.00                    | 2.07                        | 95.82          | 101.23          | 104.66         | 109.02          |
| $\Delta S^\circ$ (J/mol.K) | -1.56                       | -16.68                  | 0.00                    | -11.32                      | -37.13         | -35.55          | -24.37         | -31.83          |
| $\mu$ (Debye)              | 5.24                        | 4.18                    | 7.84                    | 7.23                        | 6.45           | 6.32            | 6.40           | 6.13            |

**Figure S21.** Geometrical parameters of (*M*)-**3c** and (*P*)-**3c** atropisomers calculated in DMSO at the IEFPCM/M06-2X-D3/6-311+G(2d,p) level of theory.

(*M*)-**3c bis**

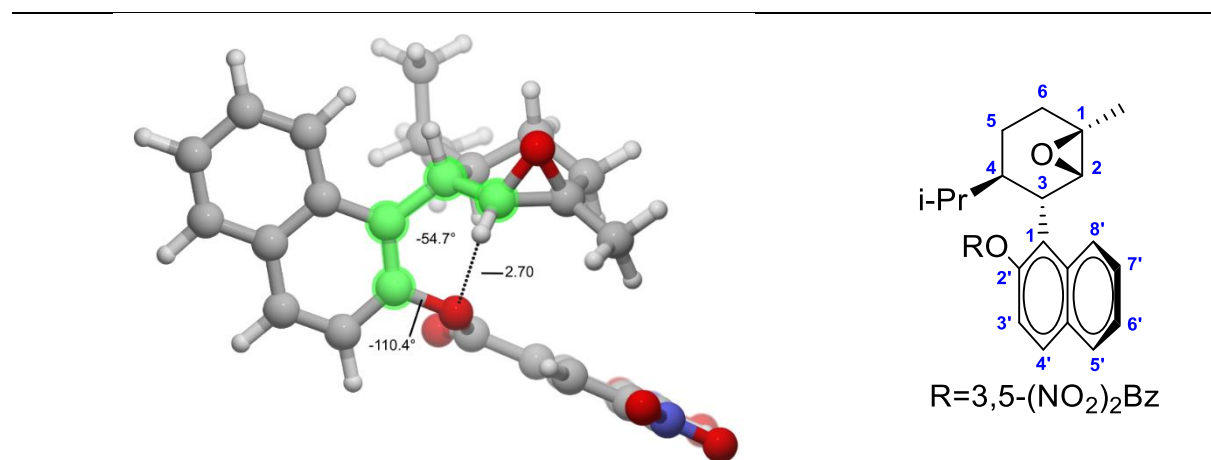

(*M*)-**3c**

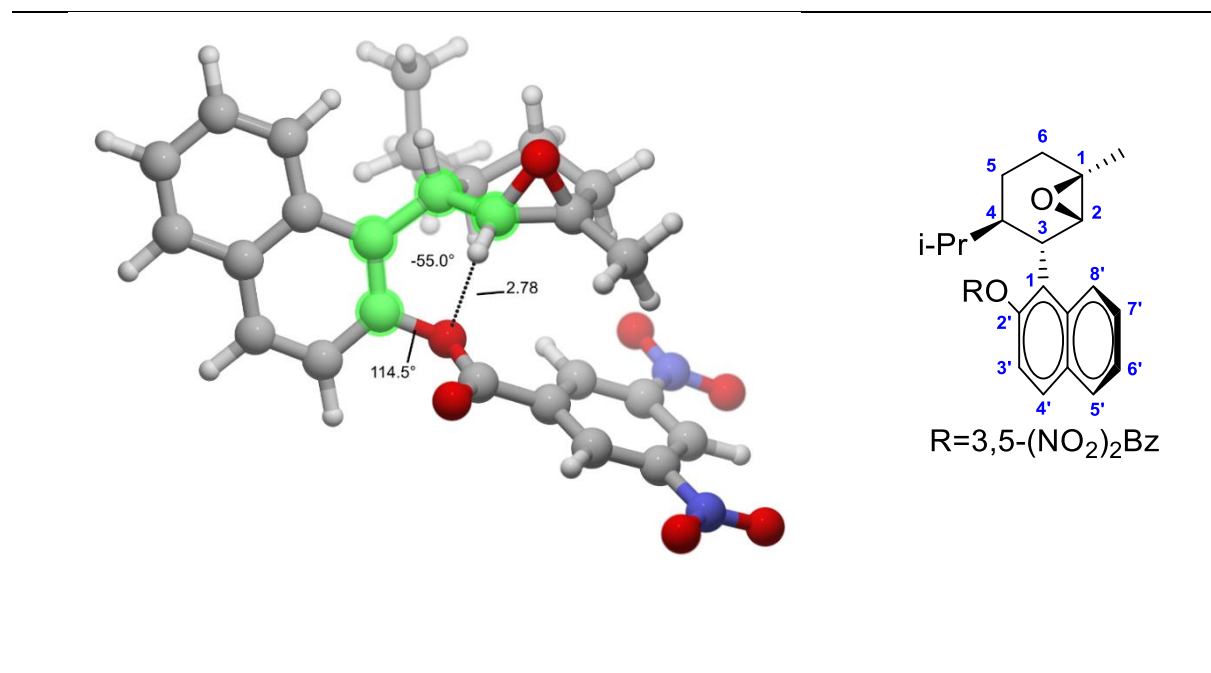

(*P*)-**3c**

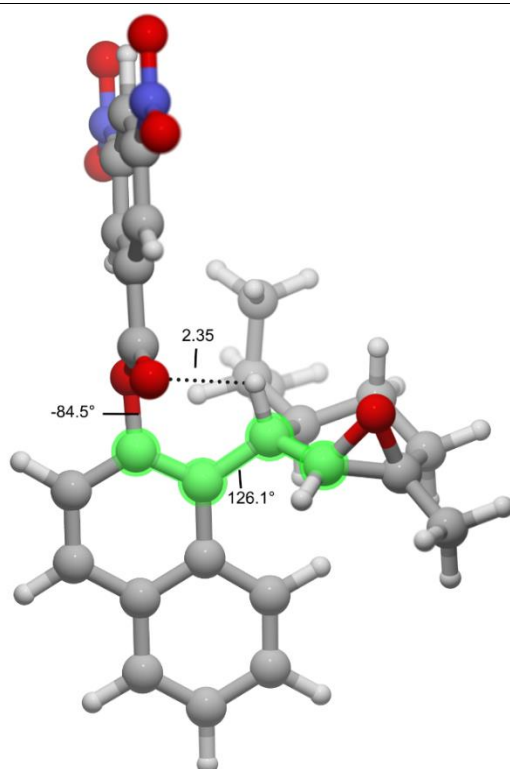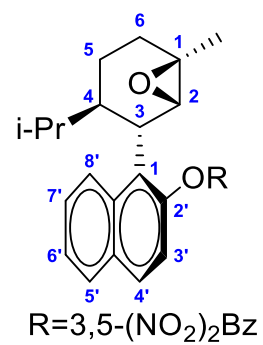

(*P*)-**3c'**

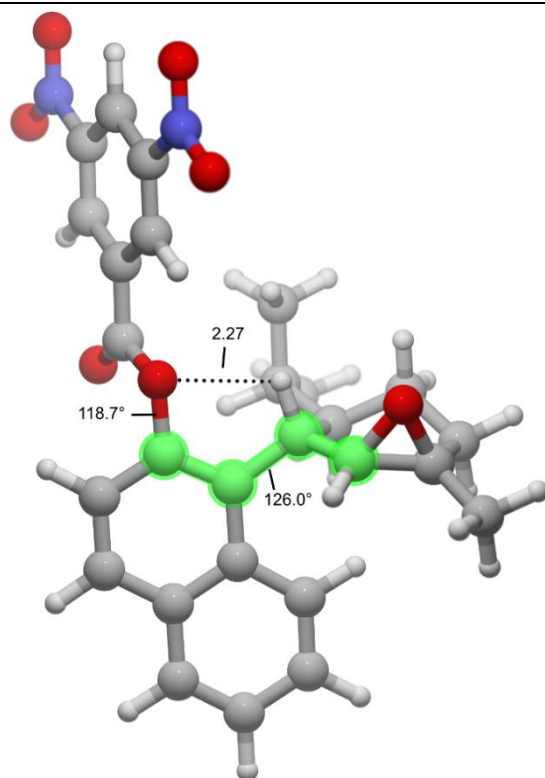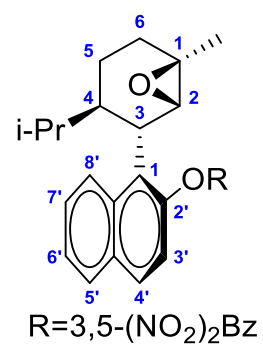

**Table S25.** NBO analysis of (*M*)-**3c** atropisomer in DMSO at the IEFPCM/M06-2X-D3/6-311+G(2d,p) level of theory.

| <i>Donnor</i>                 | <i>Acceptor</i>   | <i>Energy</i> |
|-------------------------------|-------------------|---------------|
| $\sigma$ C8'H8'               | $\sigma^*$ C3H3   | 4.56          |
| $\sigma$ C3H3                 | $\sigma^*$ C8'H8' | 2.72          |
| $\sigma$ C3H3                 | $\pi^*$ C1'C2'    | 20.59         |
| $\pi$ C1'C2'                  | $\sigma^*$ C3H3   | 4.90          |
| $\sigma^*$ CH Me $\beta$ i-Pr | $\sigma^*$ C8'H8' | 1.63          |
| $\sigma$ CH i-Pr              | $\pi^*$ C1'C2'    | 1.80          |
| $\pi$ C1''O                   | $\sigma^*$ C2H2   | 1.55          |
| n O2'                         | $\sigma^*$ C4H4   | 3.64          |
| n O2'                         | $\sigma^*$ C3H3   | 1.42          |
| n O2'                         | $\sigma^*$ C2O1   | 2.93          |
|                               | <b>Total</b>      | <b>45.73</b>  |

**Table S26.** NBO analysis of (*P*)-**3c** atropisomer in DMSO at the IEFPCM/M06-2X-D3/6-311+G(2d,p) level of theory.

| <i>Donnor</i>   | <i>Acceptor</i>    | <i>Energy</i> |
|-----------------|--------------------|---------------|
| $\sigma$ C8'H8' | $\sigma^*$ C2O1    | 2.93          |
| $\sigma$ C3H3   | $\pi^*$ C1'C8a'    | 23.47         |
| $\pi$ C1'C8a'   | $\sigma^*$ C3H3    | 4.94          |
| $\pi$ C1'C2'    | $\sigma^*$ CH i-Pr | 2.43          |
|                 | <b>Total</b>       | <b>35.98</b>  |

**Figure S22.** NCI analysis of (*M*)-**3c** and (*P*)-**3c** atropisomers implied in **3c** conformational equilibrium.

(*M*)-**3c**

---

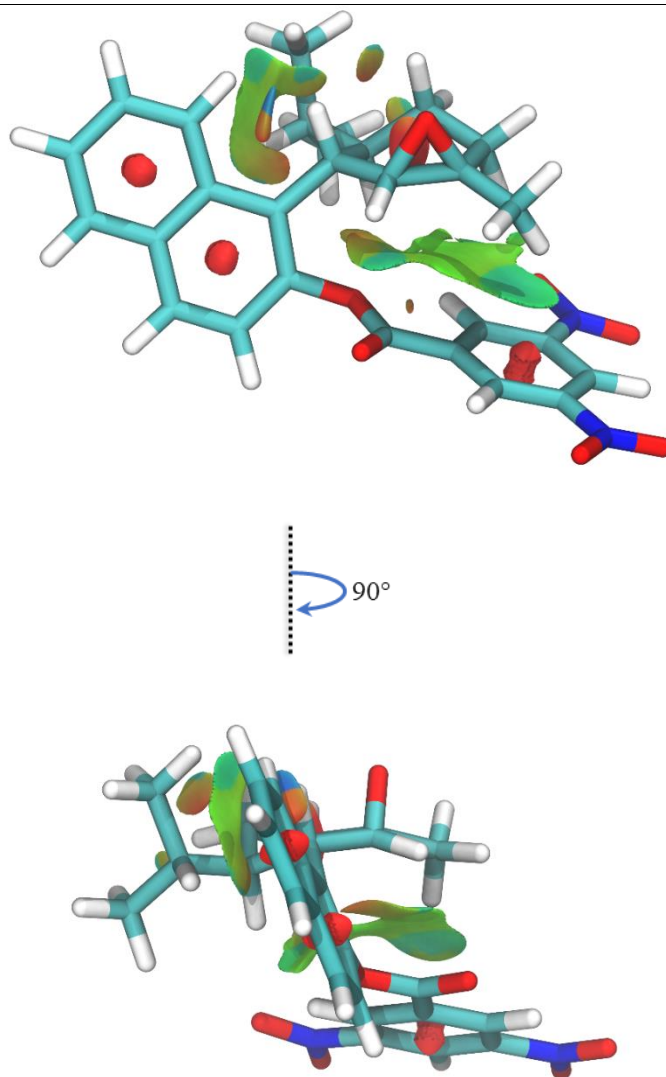

(P)-3c

---

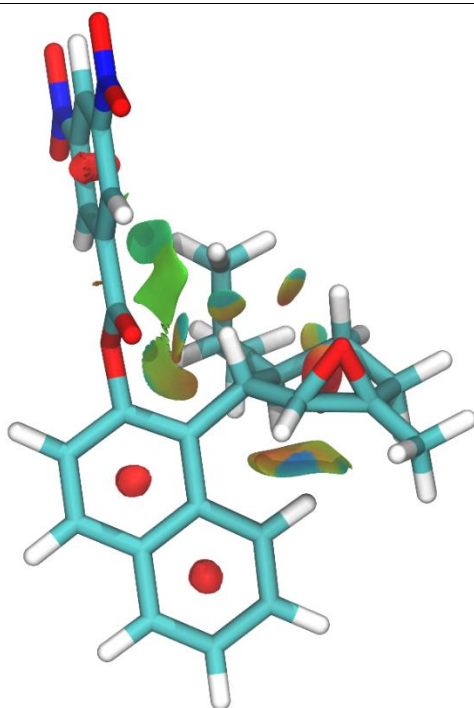

90°

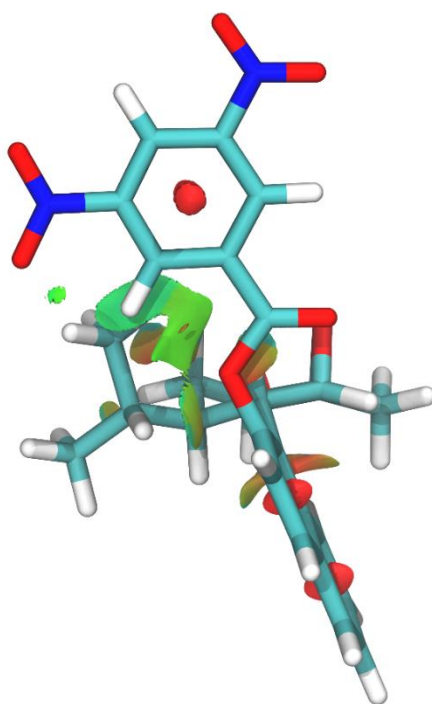

**Figure S23.** Plots of RDG vs  $\text{sign}(\lambda_2)\rho$  of (*M*)-**3c** and (*P*)-**3c** atropisomers and quantitative analysis in the attractive ( $\text{sign}(\lambda_2)\rho < 0$ ), VDW ( $\text{sign}(\lambda_2)\rho \approx 0$ ) and repulsive regions ( $\text{sign}(\lambda_2)\rho > 0$ ).

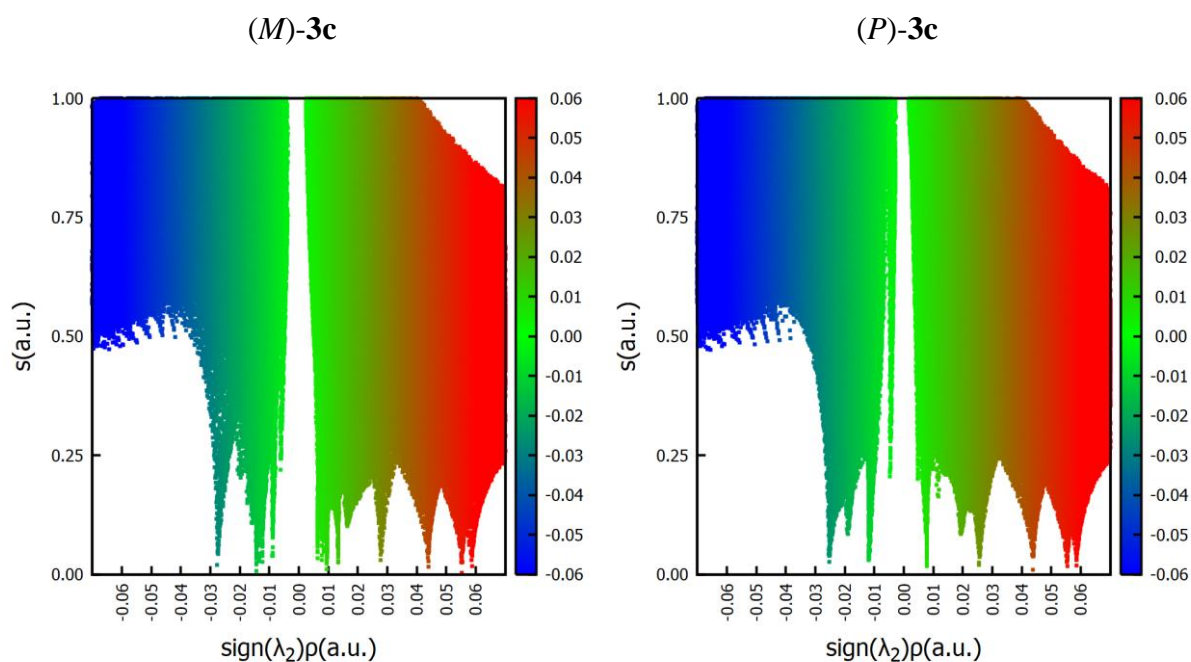

|                                  | <i>Attractive region</i> | <i>VDW region</i> | <i>Repulsive region</i> |
|----------------------------------|--------------------------|-------------------|-------------------------|
| ( <i>M</i> )- <b>3b</b>          | -0.2108                  | 0.0035            | 0.3786                  |
| ( <i>P</i> )- <b>3b</b>          | -0.2097                  | 0.0032            | 0.3785                  |
| ( <i>M</i> ) versus ( <i>P</i> ) | -1.05E-03                | 2.63E-04          | 1.62E-04                |

**Figure S24.** Geometrical parameters of located transition states implied in **3c** conformational equilibrium calculated in DMSO at the IEFPCM/M06-2X-D3/6-311+G(2d,p) level of theory.

TS1-**3c**

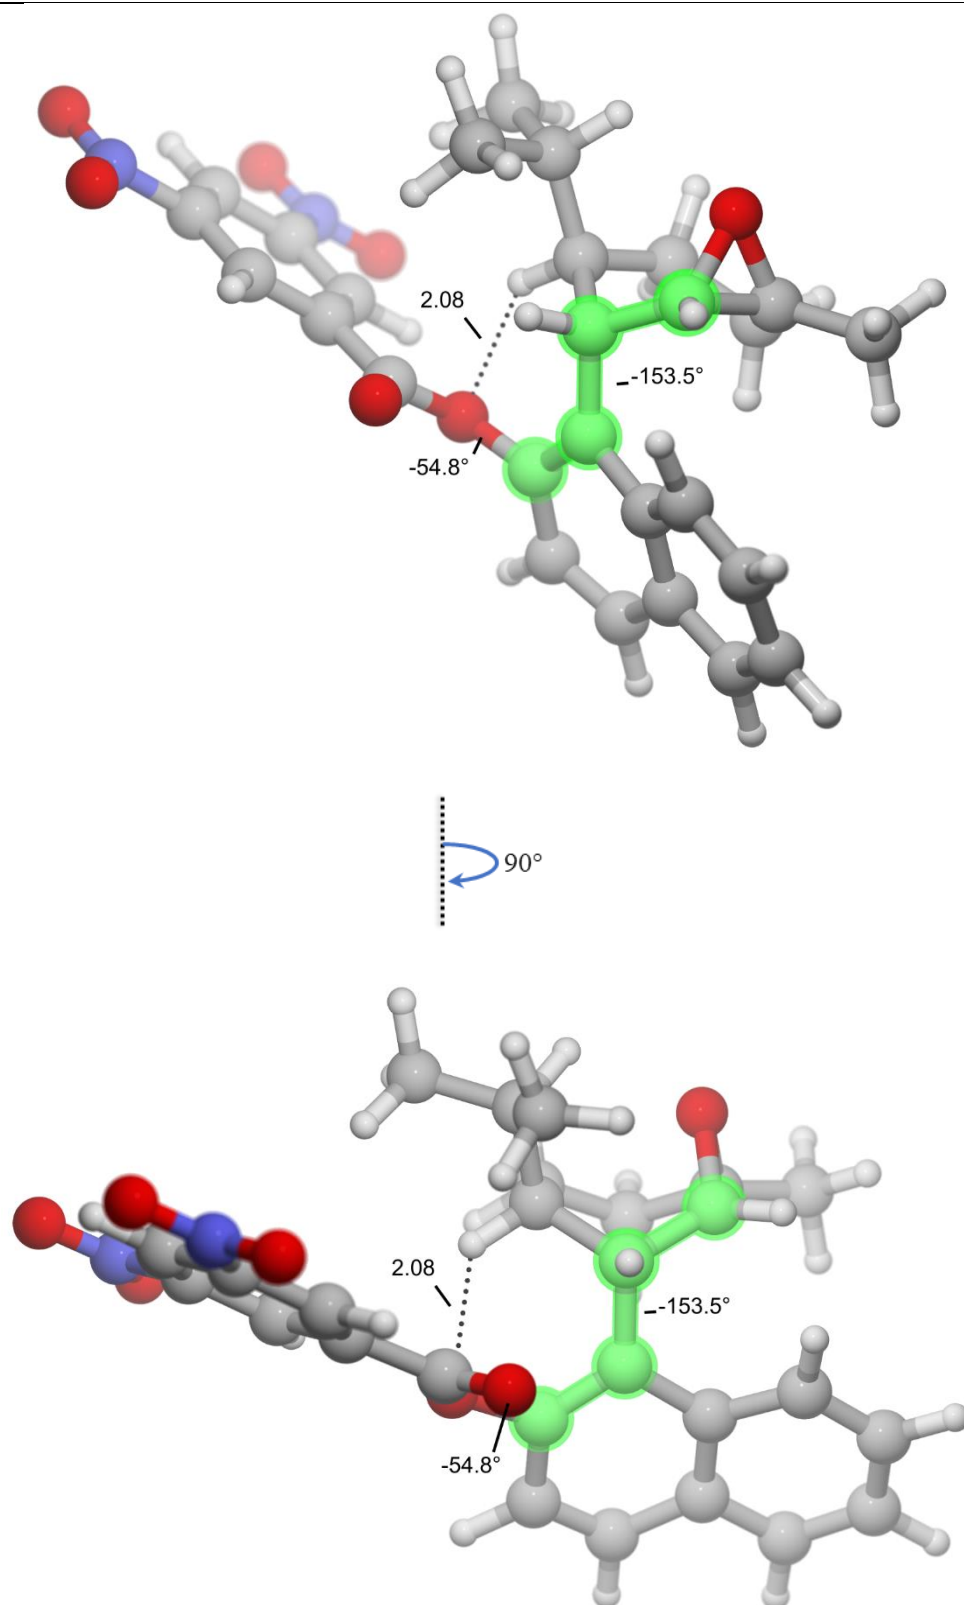



TS1'-3c

---

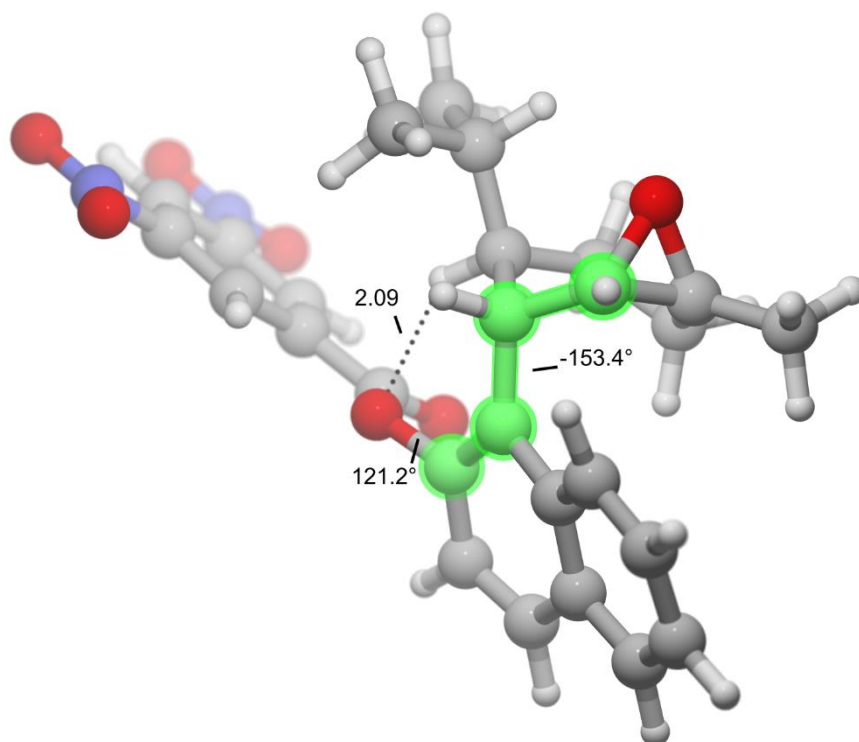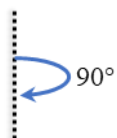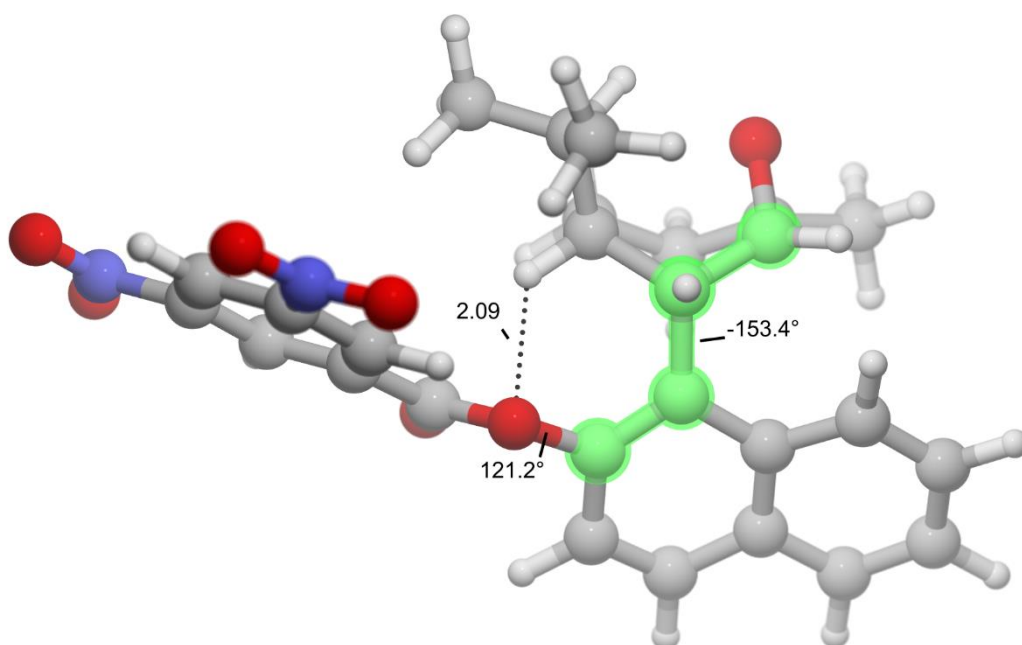

TS2-3c

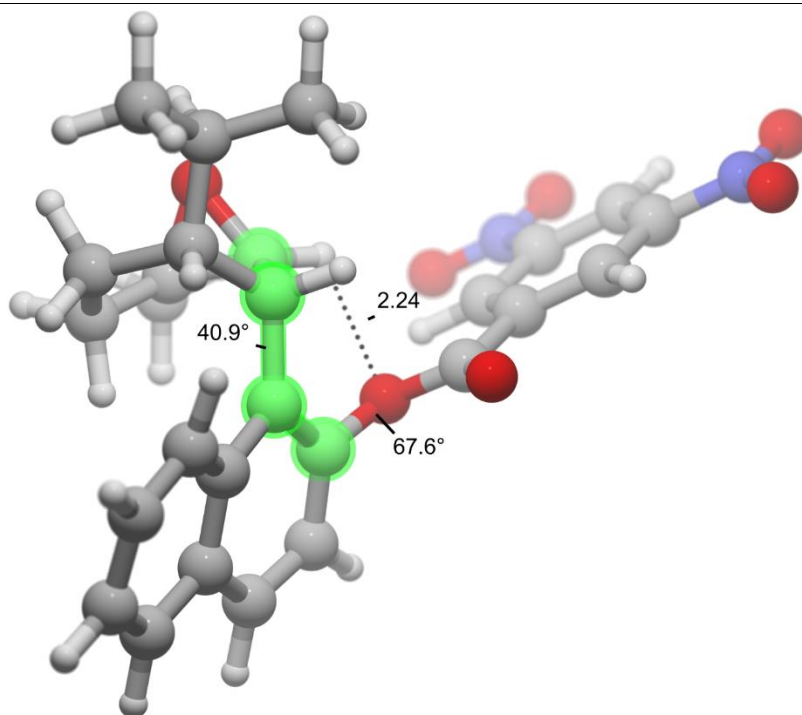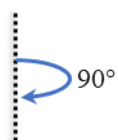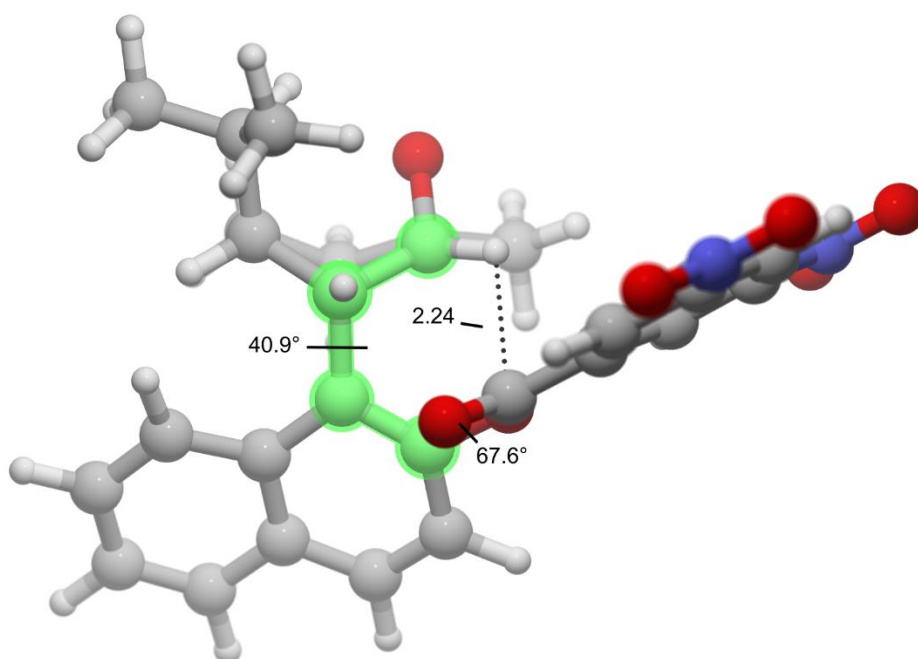

TS2'-3c

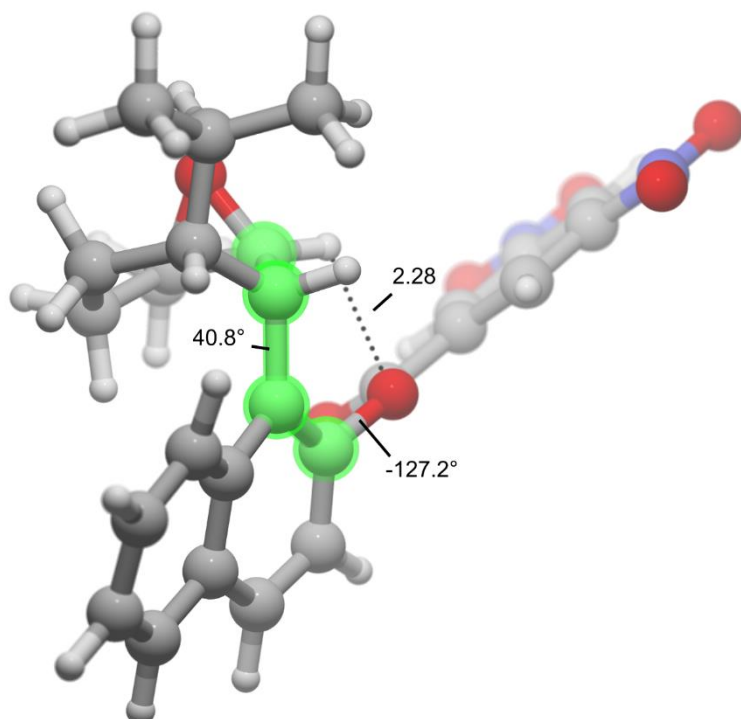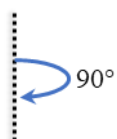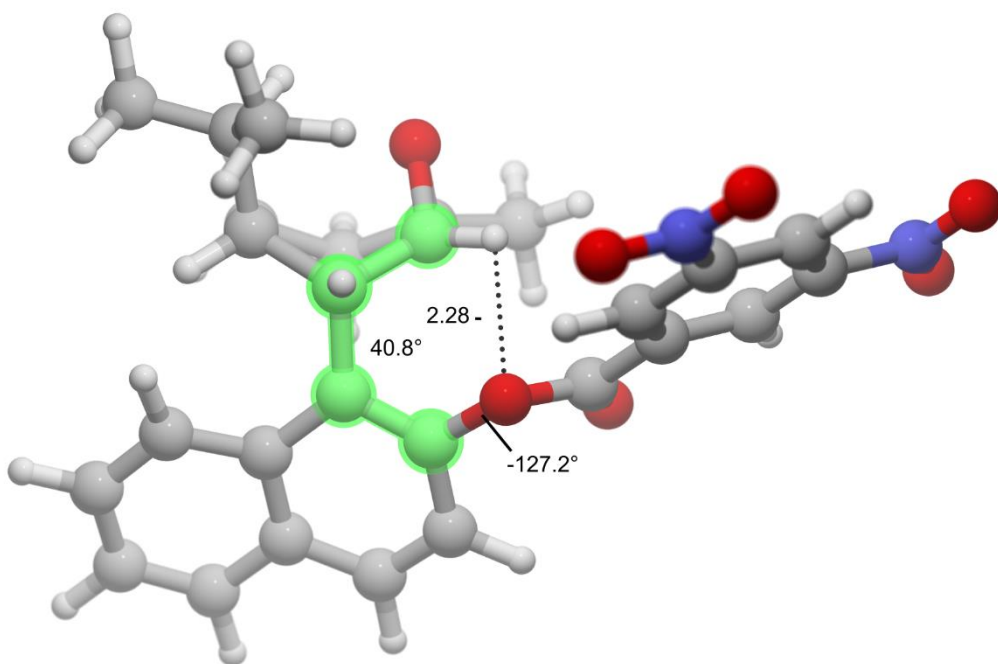

**Figure S25.** NCI analysis of located transition states implied in **3c** conformational equilibrium.

TS1-3c

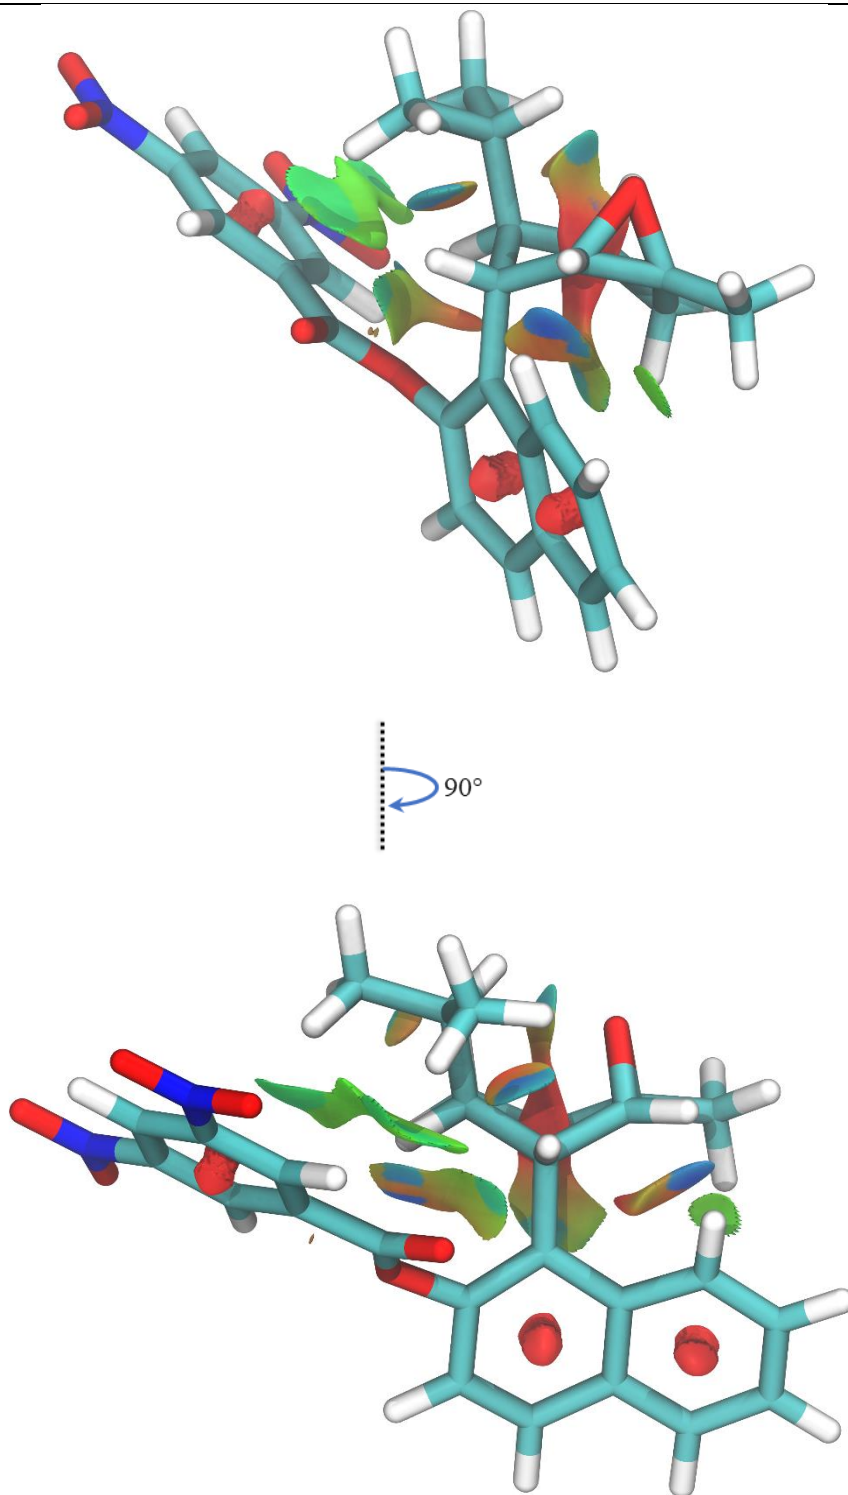

TS1'-3c

---

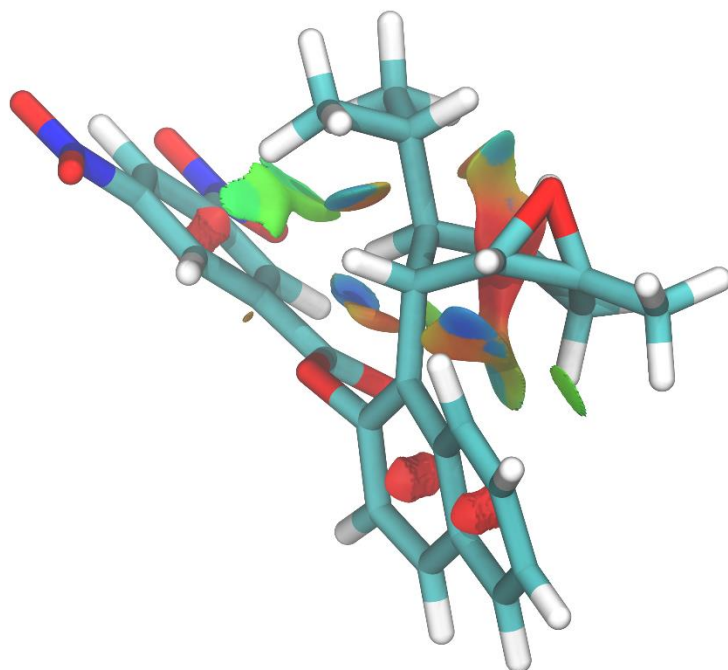

90°

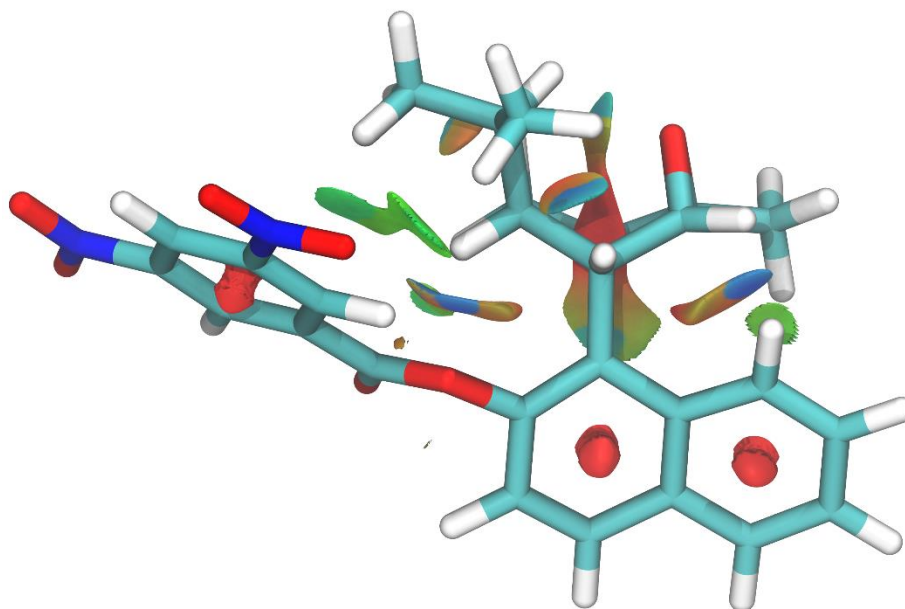

TS2-3c

---

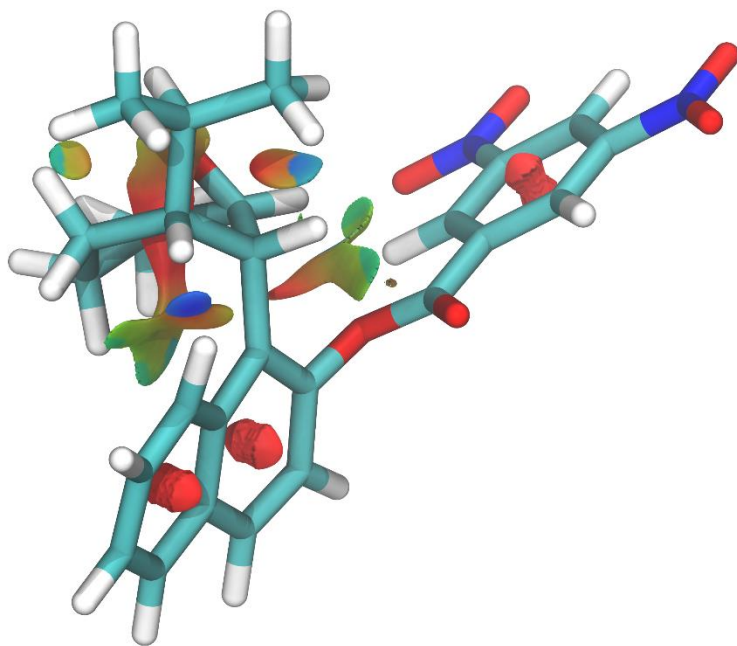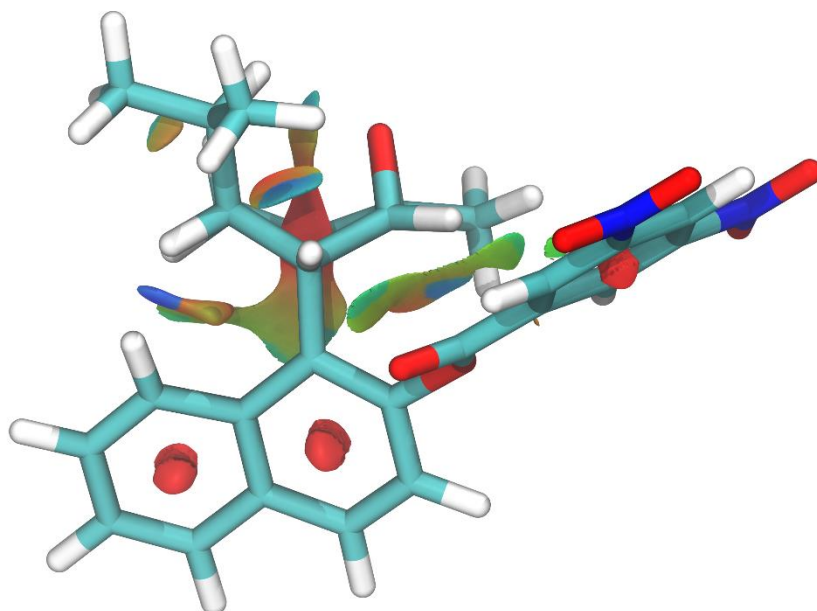

TS2'-3c

---

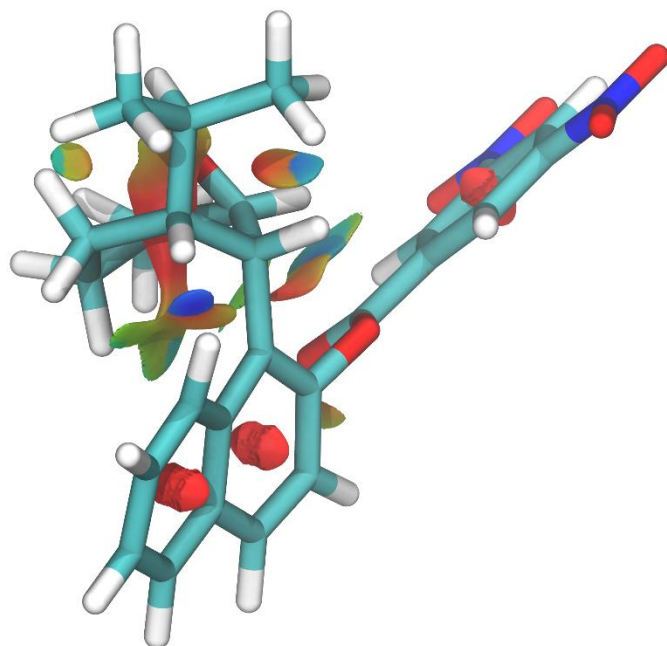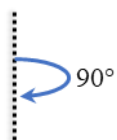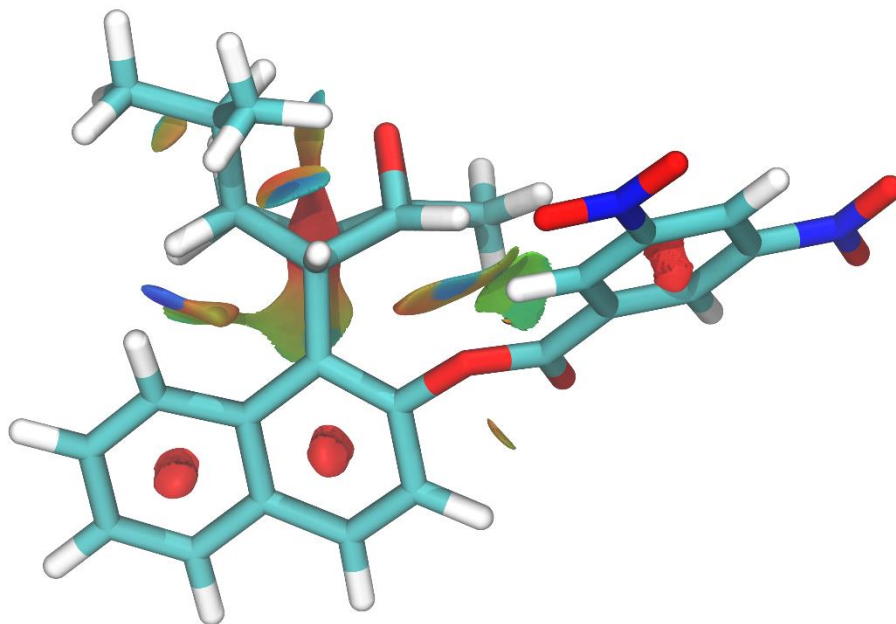

**Table S27.** Updated thermodynamic parameters of previously published structures **1a-c** and **1'a-c** calculated in implicit THF at the IEFPCM/M06-2X-D3/6-311+G(2d,p) level of theory.

|                            |                |                |                |                |
|----------------------------|----------------|----------------|----------------|----------------|
|                            | <b>(M)-1a</b>  | <b>(P)-1a</b>  | <b>TS1-1a</b>  | <b>TS2-1a</b>  |
| $\Delta H^\circ$ (kJ/mol)  | 6.6            | 0.0            | 64.5           | 70.6           |
| $\Delta G^\circ$ (kJ/mol)  | 5.4            | 0.0            | 68.8           | 76.7           |
| $\Delta S^\circ$ (J/mol.K) | 4.2            | 0.0            | -14.3          | -20.4          |
|                            | <b>(M)-1b</b>  | <b>(P)-1b</b>  | <b>TS1-1b</b>  | <b>TS2-1b</b>  |
| $\Delta H^\circ$ (kJ/mol)  | 6.8            | 0.0            | 66.5           | 70.1           |
| $\Delta G^\circ$ (kJ/mol)  | 6.3            | 0.0            | 71.5           | 76.0           |
| $\Delta S^\circ$ (J/mol.K) | 1.5            | 0.0            | -16.7          | -19.9          |
|                            | <b>(M)-1c</b>  | <b>(P)-1c</b>  | <b>TS1-1c</b>  | <b>TS2-1c</b>  |
| $\Delta H^\circ$ (kJ/mol)  | 0.0            | 11.2           | 64.1           | 75.6           |
| $\Delta G^\circ$ (kJ/mol)  | 0.0            | 6.0            | 66.8           | 78.7           |
| $\Delta S^\circ$ (J/mol.K) | 0.0            | 17.6           | -9.0           | -10.4          |
|                            | <b>(M)-1'a</b> | <b>(P)-1'a</b> | <b>TS1-1'a</b> | <b>TS2-1'a</b> |
| $\Delta H^\circ$ (kJ/mol)  | 0.0            | 0.0            | 54.0           | 56.9           |
| $\Delta G^\circ$ (kJ/mol)  | 0.0            | 0.8            | 61.3           | 66.1           |
| $\Delta S^\circ$ (J/mol.K) | 0.0            | -2.8           | -24.3          | -30.7          |
|                            | <b>(M)-1'b</b> | <b>(P)-1'b</b> | <b>TS1-1'b</b> | <b>TS2-1'b</b> |
| $\Delta H^\circ$ (kJ/mol)  | 0.7            | 0.0            | 57.4           | 58.9           |
| $\Delta G^\circ$ (kJ/mol)  | 2.5            | 0.0            | 65.7           | 66.4           |
| $\Delta S^\circ$ (J/mol.K) | -6.3           | 0.0            | -27.9          | -24.9          |
|                            | <b>(M)-1'c</b> | <b>(P)-1'c</b> | <b>TS1-1'c</b> | <b>TS2-1'c</b> |
| $\Delta H^\circ$ (kJ/mol)  | 0.0            | 11.5           | 59.3           | 63.7           |
| $\Delta G^\circ$ (kJ/mol)  | 0.0            | 7.6            | 65.7           | 71.0           |
| $\Delta S^\circ$ (J/mol.K) | 0.0            | 13.1           | -21.6          | -24.6          |



**Table S28.** Updated thermodynamic parameters of previously published structures **2'a-c** and **3'b-c** calculated in implicit DMSO at the IEFPCM/M06-2X-D3/6-311+G(2d,p) level of theory.

|                            |                 |                 |         |         |
|----------------------------|-----------------|-----------------|---------|---------|
|                            | <i>(M)</i> -2'a | <i>(P)</i> -2'a | TS1-2'a | TS2-2'a |
| $\Delta H^\circ$ (kJ/mol)  | 5.1             | 0.0             | 90.7    | 89.2    |
| $\Delta G^\circ$ (kJ/mol)  | 7.5             | 0.0             | 97.4    | 96.7    |
| $\Delta S^\circ$ (J/mol.K) | -8.1            | 0.0             | -22.6   | -25.3   |
|                            | <i>(M)</i> -2'b | <i>(P)</i> -2'b | TS1-2'b | TS2-2'b |
| $\Delta H^\circ$ (kJ/mol)  | 5.0             | 0.0             | 92.6    | 83.5    |
| $\Delta G^\circ$ (kJ/mol)  | 6.5             | 0.0             | 102.3   | 95.9    |
| $\Delta S^\circ$ (J/mol.K) | -4.8            | 0.0             | -32.4   | -41.4   |
|                            | <i>(M)</i> -2'c | <i>(P)</i> -2'c | TS1-2'c | TS2-2'c |
| $\Delta H^\circ$ (kJ/mol)  | 8.4             | 0.0             | 88.2    | 89.6    |
| $\Delta G^\circ$ (kJ/mol)  | 5.1             | 0.0             | 99.7    | 98.4    |
| $\Delta S^\circ$ (J/mol.K) | 11.1            | 0.0             | -38.5   | -29.3   |
|                            | <i>(M)</i> -3'b | <i>(P)</i> -3'b | TS1-3'b | TS2-3'b |
| $\Delta H^\circ$ (kJ/mol)  | 0.0             | 3.8             | 91.2    | 87.3    |
| $\Delta G^\circ$ (kJ/mol)  | 0.0             | 5.0             | 99.5    | 94.6    |
| $\Delta S^\circ$ (J/mol.K) | 0.0             | -4.0            | -28.0   | -24.6   |
|                            | <i>(M)</i> -3'c | <i>(P)</i> -3'c | TS1-3'c | TS2-3'c |
| $\Delta H^\circ$ (kJ/mol)  | 0.0             | 7.7             | 76.0    | 81.3    |
| $\Delta G^\circ$ (kJ/mol)  | 0.0             | 1.6             | 87.3    | 89.0    |
| $\Delta S^\circ$ (J/mol.K) | 0.0             | 20.5            | -37.9   | -26.0   |

**Table S29.** NBO analysis of located transition states TS1-3'b and TS2-3'b involved in 3'b conformational equilibrium in DMSO at the IEFPCM/M06-2X-D3/6-311+G(2d,p) level of theory.

| <i>Transition state</i> | <i>Donnor</i> | <i>Acceptor</i> | <i>Energy</i> |
|-------------------------|---------------|-----------------|---------------|
| TS1-3'b                 | n O2'         | $\sigma^*$ C4H4 | 9.0           |
| TS2-3'b                 | n O2'         | $\sigma^*$ C2O2 | 36.5          |

**Cartesian coordinates of calculated minima and located transition states in DMSO at the IEFPCM/M06-2X-D3/6-311+G(2d,p) level of theory.**

**(M)-2a**

|   |              |              |              |
|---|--------------|--------------|--------------|
| C | 1.056642000  | 1.127989000  | -1.676493000 |
| C | 0.608329000  | 0.241095000  | -0.718892000 |
| C | 3.373243000  | 0.697373000  | -1.187235000 |
| C | 2.432226000  | 1.362605000  | -1.909760000 |
| H | 4.427844000  | 0.879798000  | -1.356361000 |
| H | 2.721881000  | 2.082235000  | -2.667604000 |
| C | 1.597413000  | -0.490782000 | 0.016339000  |
| C | 2.983380000  | -0.250515000 | -0.211093000 |
| C | 3.962283000  | -0.958433000 | 0.528984000  |
| C | 3.604024000  | -1.888873000 | 1.463518000  |
| C | 2.235716000  | -2.151379000 | 1.684667000  |
| C | 1.268522000  | -1.478350000 | 0.986740000  |
| H | 5.007310000  | -0.745740000 | 0.333186000  |
| H | 4.358151000  | -2.426049000 | 2.024280000  |
| H | 1.944403000  | -2.898964000 | 2.412177000  |
| H | 0.235988000  | -1.723165000 | 1.175026000  |
| C | -2.951393000 | 0.385565000  | 0.857610000  |
| C | -1.418559000 | 0.388564000  | 0.906534000  |
| C | -0.890550000 | 0.088822000  | -0.518432000 |
| C | -1.425246000 | -1.255749000 | -1.042525000 |
| C | -2.954131000 | -1.291365000 | -1.044787000 |
| C | -3.489360000 | -0.950257000 | 0.345585000  |
| H | -3.301545000 | 1.188895000  | 0.199947000  |
| H | -3.358408000 | 0.585484000  | 1.851131000  |
| H | -1.137292000 | -0.428642000 | 1.577941000  |
| H | -1.348915000 | 0.847300000  | -1.156359000 |
| H | -3.194500000 | -1.747729000 | 1.039807000  |
| H | -4.582848000 | -0.935901000 | 0.326976000  |
| H | -1.050650000 | -1.419995000 | -2.057697000 |
| C | -0.814989000 | 1.668693000  | 1.515620000  |
| H | 0.271168000  | 1.525133000  | 1.521304000  |
| C | -3.472574000 | -2.641333000 | -1.527275000 |
| H | -4.564131000 | -2.656081000 | -1.558064000 |
| H | -3.144374000 | -3.437547000 | -0.853177000 |
| H | -3.100432000 | -2.873276000 | -2.527512000 |
| C | -1.108056000 | 2.930524000  | 0.702671000  |
| H | -2.180291000 | 3.141433000  | 0.679358000  |
| H | -0.615243000 | 3.792172000  | 1.158438000  |
| H | -0.753878000 | 2.846598000  | -0.325972000 |
| C | -1.251026000 | 1.862395000  | 2.968517000  |
| H | -2.305342000 | 2.140013000  | 3.035024000  |
| H | -1.103319000 | 0.950601000  | 3.552621000  |
| H | -0.672214000 | 2.661417000  | 3.436175000  |
| H | -1.054886000 | -2.087300000 | -0.433491000 |
| H | -3.304080000 | -0.514998000 | -1.737465000 |
| O | 0.141232000  | 1.808512000  | -2.432425000 |
| H | 0.600394000  | 2.406673000  | -3.032034000 |

**SCF Done: E(RM062X) = -852.922201721**

**# of imaginary frequencies = 0**

**(P)-2a**

|   |             |              |             |
|---|-------------|--------------|-------------|
| C | 0.705766000 | 0.611372000  | 1.751103000 |
| C | 0.591304000 | -0.000815000 | 0.520423000 |
| C | 3.112033000 | 0.608958000  | 1.678831000 |
| C | 1.957881000 | 0.925229000  | 2.327305000 |

|   |              |              |              |
|---|--------------|--------------|--------------|
| H | 4.073295000  | 0.852172000  | 2.115648000  |
| H | 1.982577000  | 1.423211000  | 3.290689000  |
| C | 1.804856000  | -0.370547000 | -0.149148000 |
| C | 3.068276000  | -0.053487000 | 0.430200000  |
| C | 4.269214000  | -0.406826000 | -0.234079000 |
| C | 4.246162000  | -1.067842000 | -1.429370000 |
| C | 3.002898000  | -1.406247000 | -2.005036000 |
| C | 1.826623000  | -1.071131000 | -1.389806000 |
| H | 5.211087000  | -0.142747000 | 0.233745000  |
| H | 5.167721000  | -1.336182000 | -1.929750000 |
| H | 2.976819000  | -1.941480000 | -2.946233000 |
| H | 0.903118000  | -1.363751000 | -1.867806000 |
| C | -3.016182000 | 0.366668000  | -0.904660000 |
| C | -1.771313000 | 0.851696000  | -0.151730000 |
| C | -0.769604000 | -0.324256000 | -0.069361000 |
| C | -1.404071000 | -1.526925000 | 0.648708000  |
| C | -2.682090000 | -1.997154000 | -0.045991000 |
| C | -3.656528000 | -0.830611000 | -0.201938000 |
| H | -2.748457000 | 0.082369000  | -1.928878000 |
| H | -3.746721000 | 1.174979000  | -0.979335000 |
| H | -2.094209000 | 1.097168000  | 0.863054000  |
| H | -0.616924000 | -0.633508000 | -1.103831000 |
| H | -3.994784000 | -0.522063000 | 0.795398000  |
| H | -4.544245000 | -1.161712000 | -0.748648000 |
| H | -0.682077000 | -2.349029000 | 0.688036000  |
| C | -1.143801000 | 2.131888000  | -0.734923000 |
| H | -0.330987000 | 2.412161000  | -0.055977000 |
| C | -3.320200000 | -3.161357000 | 0.703388000  |
| H | -4.218031000 | -3.514973000 | 0.191789000  |
| H | -2.627326000 | -4.000662000 | 0.794483000  |
| H | -3.607809000 | -2.851449000 | 1.712001000  |
| C | -0.535068000 | 1.939218000  | -2.125110000 |
| H | -1.292159000 | 1.621829000  | -2.846817000 |
| H | 0.266385000  | 1.197853000  | -2.122505000 |
| H | -0.112821000 | 2.880188000  | -2.484710000 |
| C | -2.137911000 | 3.293853000  | -0.750995000 |
| H | -2.900291000 | 3.155491000  | -1.521011000 |
| H | -1.623504000 | 4.232951000  | -0.964695000 |
| H | -2.644656000 | 3.395573000  | 0.211943000  |
| H | -1.631927000 | -1.247328000 | 1.683655000  |
| H | -2.406573000 | -2.339472000 | -1.052282000 |
| O | -0.431194000 | 0.931746000  | 2.436819000  |
| H | -0.197423000 | 1.354357000  | 3.270636000  |

**SCF Done: E(RM062X) = -852.922712587**

**# of imaginary frequencies = 0**

#### TS1-2a

|   |              |              |              |
|---|--------------|--------------|--------------|
| C | 1.876811000  | -1.974788000 | -1.324827000 |
| C | 0.810186000  | -1.589549000 | 0.934655000  |
| C | 2.039393000  | 0.273117000  | -0.160456000 |
| C | 1.839831000  | -0.460716000 | -1.494461000 |
| C | 0.835656000  | -0.040472000 | 0.795028000  |
| C | 0.781373000  | -2.434721000 | -0.356620000 |
| H | -1.360281000 | -2.839686000 | -0.390866000 |
| H | -0.878554000 | -1.531777000 | -1.465512000 |
| H | -1.226295000 | 3.646141000  | -1.194155000 |
| H | 1.086137000  | 0.348292000  | 1.786359000  |
| H | 2.857944000  | -2.273825000 | -0.942639000 |
| H | 1.750320000  | -2.474490000 | -2.289330000 |
| H | 0.872666000  | -0.159400000 | -1.910588000 |

|   |              |              |              |
|---|--------------|--------------|--------------|
| H | 3.482774000  | 1.939091000  | 1.466558000  |
| H | -0.512942000 | -3.203613000 | -1.899048000 |
| C | -0.449571000 | 0.703114000  | 0.360231000  |
| C | -2.586026000 | 2.018662000  | -1.008792000 |
| C | -1.405267000 | 2.653973000  | -0.793572000 |
| C | -0.367257000 | 2.020024000  | -0.066905000 |
| H | 2.590386000  | -0.136073000 | -2.216965000 |
| C | 3.418790000  | 0.003752000  | 0.489486000  |
| H | 2.052936000  | 1.333656000  | -0.383857000 |
| C | 4.547168000  | 0.259937000  | -0.513568000 |
| H | 2.962891000  | 0.637232000  | 2.542292000  |
| H | 4.656546000  | 0.775137000  | 2.094176000  |
| H | 3.500250000  | -1.038967000 | 0.806359000  |
| C | -0.573409000 | -2.500075000 | -1.065132000 |
| H | 4.456731000  | 1.261674000  | -0.945386000 |
| H | 5.517745000  | 0.194735000  | -0.018193000 |
| H | 4.544188000  | -0.461379000 | -1.331430000 |
| C | 3.636223000  | 0.886446000  | 1.721842000  |
| H | 1.015929000  | -3.457371000 | -0.042583000 |
| H | 0.040562000  | -1.948425000 | 1.606825000  |
| H | 1.745285000  | -1.836467000 | 1.444012000  |
| O | 0.743377000  | 2.763743000  | 0.217975000  |
| H | -3.365780000 | 2.476515000  | -1.605324000 |
| C | -1.791825000 | 0.170652000  | 0.396221000  |
| C | -2.832064000 | 0.784102000  | -0.363520000 |
| C | -4.127354000 | 0.211675000  | -0.404912000 |
| C | -4.447705000 | -0.869912000 | 0.366505000  |
| C | -3.475579000 | -1.384742000 | 1.247391000  |
| C | -2.199439000 | -0.887649000 | 1.256218000  |
| H | -4.873328000 | 0.681777000  | -1.036024000 |
| H | -5.444582000 | -1.291035000 | 0.343765000  |
| H | -3.741754000 | -2.174057000 | 1.939796000  |
| H | -1.515490000 | -1.270568000 | 1.992542000  |
| H | 0.659095000  | 3.635959000  | -0.183463000 |

**SCF Done: E(RM062X) = -852.887509426**

**# of imaginary frequencies = 1 (-47.0610)**

### TS2-2a

|   |              |              |              |
|---|--------------|--------------|--------------|
| C | -2.092460000 | -0.781538000 | 1.948921000  |
| C | -1.624323000 | -1.707094000 | -0.366285000 |
| C | -1.598523000 | 0.740825000  | -0.023198000 |
| C | -1.408078000 | 0.501885000  | 1.483364000  |
| C | -0.905812000 | -0.404506000 | -0.824382000 |
| C | -1.600811000 | -1.993867000 | 1.147488000  |
| H | 0.161441000  | -3.274089000 | 1.043495000  |
| H | 0.494193000  | -1.678507000 | 1.714451000  |
| H | 3.053616000  | -2.891344000 | -0.715369000 |
| H | -1.135573000 | -0.272262000 | -1.885688000 |
| H | -3.175546000 | -0.677640000 | 1.833839000  |
| H | -1.907052000 | -0.943452000 | 3.014752000  |
| H | -0.335779000 | 0.444771000  | 1.693421000  |
| H | -2.558403000 | 1.957557000  | -2.270311000 |
| H | -0.364135000 | -2.875447000 | 2.685227000  |
| C | 0.637035000  | -0.477775000 | -0.710599000 |
| C | 3.339484000  | -0.942082000 | 0.089015000  |
| C | 2.631988000  | -1.904459000 | -0.556563000 |
| C | 1.304204000  | -1.659097000 | -0.985385000 |
| H | -1.778234000 | 1.356786000  | 2.051456000  |
| C | -3.083266000 | 0.950477000  | -0.418434000 |
| H | -1.145661000 | 1.698296000  | -0.249868000 |

|   |              |              |              |
|---|--------------|--------------|--------------|
| C | -3.669821000 | 2.146418000  | 0.337003000  |
| H | -3.041391000 | 0.272523000  | -2.503235000 |
| H | -4.259452000 | 1.492394000  | -2.156341000 |
| H | -3.679958000 | 0.077170000  | -0.147906000 |
| C | -0.246029000 | -2.479869000 | 1.673609000  |
| H | -3.063951000 | 3.042624000  | 0.170759000  |
| H | -4.681981000 | 2.356725000  | -0.013339000 |
| H | -3.723852000 | 1.969380000  | 1.411448000  |
| C | -3.241160000 | 1.174836000  | -1.924275000 |
| H | -2.309074000 | -2.813768000 | 1.306840000  |
| H | -1.253903000 | -2.575992000 | -0.895451000 |
| H | -2.669244000 | -1.599683000 | -0.667025000 |
| H | 4.331856000  | -1.142454000 | 0.474578000  |
| C | 1.491962000  | 0.618825000  | -0.316600000 |
| C | 2.806385000  | 0.365990000  | 0.175915000  |
| C | 3.609809000  | 1.426225000  | 0.663531000  |
| C | 3.194726000  | 2.725232000  | 0.578267000  |
| C | 1.970902000  | 3.004174000  | -0.063134000 |
| C | 1.155233000  | 1.991619000  | -0.494935000 |
| H | 4.583690000  | 1.182398000  | 1.073154000  |
| H | 3.818979000  | 3.531618000  | 0.941002000  |
| H | 1.682157000  | 4.031954000  | -0.245986000 |
| H | 0.281705000  | 2.256218000  | -1.067242000 |
| O | 0.674273000  | -2.659330000 | -1.669369000 |
| H | 1.252681000  | -3.428454000 | -1.721644000 |

**SCF Done: E(RM062X) = -852.889889417**

**# of imaginary frequencies = 1 (-39.3652)**

**(M)-2b**

|   |              |              |              |
|---|--------------|--------------|--------------|
| C | 1.115782000  | 1.666725000  | -0.569335000 |
| C | 0.606208000  | 0.390957000  | -0.373607000 |
| C | 3.393270000  | 0.896233000  | -0.428778000 |
| C | 2.508066000  | 1.921275000  | -0.589358000 |
| H | 4.459317000  | 1.091054000  | -0.436922000 |
| H | 2.877633000  | 2.926314000  | -0.730105000 |
| C | 1.536569000  | -0.687002000 | -0.248239000 |
| C | 2.938230000  | -0.428988000 | -0.262522000 |
| C | 3.864319000  | -1.493265000 | -0.115992000 |
| C | 3.438924000  | -2.782275000 | 0.029926000  |
| C | 2.053060000  | -3.055857000 | 0.024933000  |
| C | 1.137308000  | -2.048187000 | -0.109395000 |
| H | 4.922603000  | -1.257294000 | -0.125790000 |
| H | 4.151521000  | -3.589591000 | 0.140401000  |
| H | 1.709176000  | -4.078195000 | 0.123186000  |
| H | 0.091028000  | -2.305470000 | -0.126281000 |
| C | -2.992976000 | -0.315598000 | 0.941568000  |
| C | -1.462822000 | -0.410741000 | 0.986863000  |
| C | -0.902929000 | 0.215089000  | -0.314751000 |
| C | -1.467746000 | -0.482414000 | -1.564951000 |
| C | -2.996074000 | -0.438811000 | -1.591450000 |
| C | -3.559340000 | -1.016043000 | -0.293491000 |
| H | -3.297071000 | 0.736931000  | 0.927253000  |
| H | -3.422878000 | -0.760451000 | 1.841603000  |
| H | -1.228006000 | -1.479273000 | 1.011041000  |
| H | -1.316259000 | 1.224457000  | -0.341539000 |
| H | -3.310441000 | -2.084189000 | -0.248274000 |
| H | -4.650826000 | -0.945936000 | -0.300927000 |
| H | -1.068979000 | 0.007058000  | -2.459083000 |
| C | -0.837319000 | 0.192238000  | 2.259795000  |
| H | 0.242441000  | 0.023751000  | 2.182141000  |

|   |              |              |              |
|---|--------------|--------------|--------------|
| C | -3.546730000 | -1.167570000 | -2.812023000 |
| H | -4.636751000 | -1.109786000 | -2.847104000 |
| H | -3.266862000 | -2.224401000 | -2.781935000 |
| H | -3.153184000 | -0.742039000 | -3.737669000 |
| C | -1.058608000 | 1.699502000  | 2.397966000  |
| H | -2.121837000 | 1.932339000  | 2.498174000  |
| H | -0.556716000 | 2.070420000  | 3.294378000  |
| H | -0.667786000 | 2.251506000  | 1.541461000  |
| C | -1.316101000 | -0.529317000 | 3.520289000  |
| H | -2.361464000 | -0.299803000 | 3.738628000  |
| H | -1.221541000 | -1.613238000 | 3.417632000  |
| H | -0.725515000 | -0.218315000 | 4.384385000  |
| H | -1.145446000 | -1.528079000 | -1.610509000 |
| H | -3.298260000 | 0.615003000  | -1.647897000 |
| O | 0.218762000  | 2.678440000  | -0.753187000 |
| C | 0.693376000  | 4.014002000  | -0.776170000 |
| H | 1.328795000  | 4.196069000  | -1.645028000 |
| H | -0.191411000 | 4.641577000  | -0.841215000 |
| H | 1.241823000  | 4.252347000  | 0.137824000  |

**SCF Done: E(RM062X) = -892.208361531**

**# of imaginary frequencies = 0**

**(P)-2b**

|   |              |              |              |
|---|--------------|--------------|--------------|
| C | -0.698221000 | 1.437839000  | -0.872768000 |
| C | -0.610673000 | 0.170996000  | -0.317056000 |
| C | -3.105894000 | 1.413725000  | -0.816050000 |
| C | -1.943268000 | 2.064210000  | -1.113129000 |
| H | -4.059936000 | 1.895406000  | -0.995625000 |
| H | -1.982118000 | 3.059395000  | -1.531088000 |
| C | -1.829988000 | -0.525915000 | -0.045163000 |
| C | -3.085073000 | 0.107182000  | -0.286411000 |
| C | -4.297774000 | -0.573413000 | -0.004523000 |
| C | -4.293542000 | -1.847192000 | 0.485335000  |
| C | -3.058131000 | -2.496037000 | 0.708090000  |
| C | -1.872882000 | -1.862448000 | 0.453947000  |
| H | -5.231944000 | -0.056185000 | -0.193149000 |
| H | -5.222543000 | -2.361098000 | 0.696370000  |
| H | -3.048087000 | -3.512156000 | 1.082884000  |
| H | -0.958489000 | -2.410018000 | 0.629597000  |
| C | 2.969227000  | -0.554879000 | 1.046187000  |
| C | 1.762576000  | 0.344827000  | 0.752188000  |
| C | 0.737285000  | -0.480747000 | -0.061115000 |
| C | 1.366042000  | -0.980268000 | -1.372673000 |
| C | 2.610749000  | -1.830770000 | -1.118409000 |
| C | 3.605495000  | -1.064506000 | -0.247502000 |
| H | 2.660512000  | -1.410555000 | 1.657671000  |
| H | 3.715437000  | -0.004096000 | 1.622920000  |
| H | 2.125809000  | 1.159144000  | 0.120786000  |
| H | 0.558855000  | -1.368775000 | 0.545700000  |
| H | 3.984957000  | -0.209133000 | -0.820829000 |
| H | 4.466021000  | -1.701379000 | -0.022742000 |
| H | 0.628115000  | -1.566243000 | -1.930221000 |
| C | 1.146239000  | 0.998709000  | 2.002643000  |
| H | 0.357611000  | 1.667986000  | 1.641565000  |
| C | 3.247776000  | -2.281171000 | -2.428229000 |
| H | 4.120271000  | -2.912440000 | -2.246079000 |
| H | 2.540115000  | -2.846364000 | -3.038643000 |
| H | 3.575283000  | -1.414099000 | -3.008752000 |
| C | 0.497238000  | -0.001838000 | 2.960795000  |
| H | 1.229979000  | -0.721799000 | 3.334292000  |

|   |              |              |              |
|---|--------------|--------------|--------------|
| H | -0.314672000 | -0.556245000 | 2.485766000  |
| H | 0.079589000  | 0.519955000  | 3.824705000  |
| C | 2.162443000  | 1.863098000  | 2.750118000  |
| H | 2.904176000  | 1.250018000  | 3.267064000  |
| H | 1.661887000  | 2.475429000  | 3.502951000  |
| H | 2.692771000  | 2.531148000  | 2.066766000  |
| H | 1.631338000  | -0.117988000 | -1.994801000 |
| H | 2.295028000  | -2.722047000 | -0.560065000 |
| O | 0.473328000  | 2.059333000  | -1.177659000 |
| C | 0.434035000  | 3.381333000  | -1.686743000 |
| H | 1.470943000  | 3.676720000  | -1.823642000 |
| H | -0.082964000 | 3.421527000  | -2.647714000 |
| H | -0.046529000 | 4.062821000  | -0.981624000 |

**SCF Done: E(RM062X) = -892.208945472**

**# of imaginary frequencies = 0**

### TS1-2b

|   |              |              |              |
|---|--------------|--------------|--------------|
| C | 1.643708000  | -2.208333000 | -1.412390000 |
| C | 0.570345000  | -1.886518000 | 0.848431000  |
| C | 1.981143000  | -0.063860000 | -0.096394000 |
| C | 1.748066000  | -0.689579000 | -1.479140000 |
| C | 0.742822000  | -0.340173000 | 0.827970000  |
| C | 0.483280000  | -2.624653000 | -0.503339000 |
| H | -1.689059000 | -2.786160000 | -0.596860000 |
| H | -1.042866000 | -1.475189000 | -1.576593000 |
| H | -1.020866000 | 3.557274000  | -1.062206000 |
| H | 1.015988000  | -0.053145000 | 1.847316000  |
| H | 2.581179000  | -2.620391000 | -1.024993000 |
| H | 1.502410000  | -2.630163000 | -2.411480000 |
| H | 0.822954000  | -0.273812000 | -1.892028000 |
| H | 3.610888000  | 1.428721000  | 1.543340000  |
| H | -0.852839000 | -3.145976000 | -2.113098000 |
| C | -0.474577000 | 0.529247000  | 0.436550000  |
| C | -2.473137000 | 2.016106000  | -0.940051000 |
| C | -1.256216000 | 2.571497000  | -0.686172000 |
| C | -0.285248000 | 1.852248000  | 0.054106000  |
| H | 2.542325000  | -0.387331000 | -2.163598000 |
| C | 3.323711000  | -0.477714000 | 0.553980000  |
| H | 2.082682000  | 1.004215000  | -0.251554000 |
| C | 4.482657000  | -0.315221000 | -0.433376000 |
| H | 2.889619000  | 0.207981000  | 2.596732000  |
| H | 4.600773000  | 0.120542000  | 2.202171000  |
| H | 3.298306000  | -1.528218000 | 0.855052000  |
| C | -0.854445000 | -2.494514000 | -1.235787000 |
| H | 4.491370000  | 0.697405000  | -0.849486000 |
| H | 5.436675000  | -0.478068000 | 0.071598000  |
| H | 4.422015000  | -1.020151000 | -1.263072000 |
| C | 3.615881000  | 0.364735000  | 1.799155000  |
| H | 0.603907000  | -3.686840000 | -0.265230000 |
| H | -0.246154000 | -2.216697000 | 1.478542000  |
| H | 1.466731000  | -2.262909000 | 1.348031000  |
| O | 0.860124000  | 2.477958000  | 0.448625000  |
| H | -3.205023000 | 2.537513000  | -1.545410000 |
| C | -1.848401000 | 0.094819000  | 0.447129000  |
| C | -2.824628000 | 0.795647000  | -0.320631000 |
| C | -4.156085000 | 0.314875000  | -0.397374000 |
| C | -4.565001000 | -0.754165000 | 0.348570000  |
| C | -3.650463000 | -1.351060000 | 1.241574000  |
| C | -2.343460000 | -0.946296000 | 1.283000000  |
| H | -4.855502000 | 0.845054000  | -1.034140000 |

|   |              |              |              |
|---|--------------|--------------|--------------|
| H | -5.588090000 | -1.104270000 | 0.299009000  |
| H | -3.988223000 | -2.127690000 | 1.916815000  |
| H | -1.700525000 | -1.381188000 | 2.028999000  |
| C | 1.369977000  | 3.536575000  | -0.351055000 |
| H | 0.795105000  | 4.453443000  | -0.213478000 |
| H | 2.391056000  | 3.702156000  | -0.014411000 |
| H | 1.374609000  | 3.258261000  | -1.407497000 |

**SCF Done: E(RM062X) = -892.173902930**

**# of imaginary frequencies = 1 (-37.5088)**

### TS2-2b

|   |              |              |              |
|---|--------------|--------------|--------------|
| C | -2.101822000 | -0.693047000 | 2.059325000  |
| C | -1.396656000 | -1.802905000 | -0.109384000 |
| C | -1.787032000 | 0.636680000  | -0.082946000 |
| C | -1.621331000 | 0.620042000  | 1.445338000  |
| C | -0.881938000 | -0.464621000 | -0.718250000 |
| C | -1.386089000 | -1.894271000 | 1.428280000  |
| H | 0.563573000  | -2.865341000 | 1.520094000  |
| H | 0.606673000  | -1.164123000 | 1.977362000  |
| H | 3.451757000  | -2.166923000 | -0.147989000 |
| H | -1.088585000 | -0.506917000 | -1.791654000 |
| H | -3.181862000 | -0.788899000 | 1.912605000  |
| H | -1.934189000 | -0.688578000 | 3.140298000  |
| H | -0.563764000 | 0.771863000  | 1.681409000  |
| H | -2.837985000 | 1.380058000  | -2.489340000 |
| H | -0.077808000 | -2.353891000 | 3.087151000  |
| C | 0.645090000  | -0.250667000 | -0.565230000 |
| C | 3.328143000  | -0.120078000 | 0.372149000  |
| C | 2.840041000  | -1.276927000 | -0.155716000 |
| C | 1.518907000  | -1.328545000 | -0.664349000 |
| H | -2.150745000 | 1.463347000  | 1.891590000  |
| C | -3.268725000 | 0.544999000  | -0.530745000 |
| H | -1.488055000 | 1.621828000  | -0.419146000 |
| C | -4.071387000 | 1.713490000  | 0.048438000  |
| H | -3.034030000 | -0.377242000 | -2.505855000 |
| H | -4.445488000 | 0.659726000  | -2.347274000 |
| H | -3.726639000 | -0.373386000 | -0.158087000 |
| C | 0.009241000  | -2.075841000 | 2.034102000  |
| H | -3.613863000 | 2.669185000  | -0.225822000 |
| H | -5.090060000 | 1.705222000  | -0.343617000 |
| H | -4.137119000 | 1.669891000  | 1.135861000  |
| C | -3.399640000 | 0.546318000  | -2.055719000 |
| H | -1.954881000 | -2.796075000 | 1.678288000  |
| H | -0.871169000 | -2.657504000 | -0.517319000 |
| H | -2.432936000 | -1.906573000 | -0.439895000 |
| H | 4.315496000  | -0.090256000 | 0.817483000  |
| C | 1.272461000  | 1.020129000  | -0.309237000 |
| C | 2.583005000  | 1.072346000  | 0.252494000  |
| C | 3.166252000  | 2.315669000  | 0.607433000  |
| C | 2.541115000  | 3.495816000  | 0.323971000  |
| C | 1.322251000  | 3.464758000  | -0.387339000 |
| C | 0.715089000  | 2.276528000  | -0.692094000 |
| H | 4.143740000  | 2.305617000  | 1.076709000  |
| H | 2.998088000  | 4.441800000  | 0.584488000  |
| H | 0.874945000  | 4.391260000  | -0.726039000 |
| H | -0.157973000 | 2.301270000  | -1.323455000 |
| O | 1.063169000  | -2.463387000 | -1.260173000 |
| C | 1.846148000  | -3.643888000 | -1.200311000 |
| H | 1.247027000  | -4.419516000 | -1.670238000 |
| H | 2.781927000  | -3.527888000 | -1.750346000 |



H 2.059844000 -3.926762000 -0.167130000  
**SCF Done: E(RM062X) = -892.175933608**  
**# of imaginary frequencies = 1 (-42.8575)**

**(M)-2c bis**

|   |              |              |              |
|---|--------------|--------------|--------------|
| C | 1.380271000  | -0.865589000 | -1.439158000 |
| C | 2.171596000  | -0.448360000 | -0.397670000 |
| C | 3.182483000  | -1.800198000 | -2.692790000 |
| C | 1.852415000  | -1.533003000 | -2.583278000 |
| H | 3.575159000  | -2.306333000 | -3.566150000 |
| H | 1.144839000  | -1.812185000 | -3.353016000 |
| C | 3.570889000  | -0.755880000 | -0.499547000 |
| C | 4.069721000  | -1.422670000 | -1.655342000 |
| C | 5.453204000  | -1.711529000 | -1.763639000 |
| C | 6.324033000  | -1.367345000 | -0.769166000 |
| C | 5.838061000  | -0.721023000 | 0.386590000  |
| C | 4.507619000  | -0.426394000 | 0.517102000  |
| H | 5.804718000  | -2.216167000 | -2.656177000 |
| H | 7.378860000  | -1.592577000 | -0.860468000 |
| H | 6.523650000  | -0.458383000 | 1.182389000  |
| H | 4.173155000  | 0.055167000  | 1.421312000  |
| O | 0.006159000  | -0.579626000 | -1.439383000 |
| C | 1.147004000  | 2.319566000  | 2.141120000  |
| C | 2.064471000  | 1.697417000  | 1.080332000  |
| C | 1.540193000  | 0.270646000  | 0.782100000  |
| C | 1.517092000  | -0.593913000 | 2.055644000  |
| C | 0.633602000  | 0.038807000  | 3.130904000  |
| C | 1.095481000  | 1.468736000  | 3.410369000  |
| H | 0.133461000  | 2.420708000  | 1.737088000  |
| H | 1.493253000  | 3.324623000  | 2.390182000  |
| H | 3.056280000  | 1.629958000  | 1.537331000  |
| H | 0.490494000  | 0.422358000  | 0.517775000  |
| H | 2.095863000  | 1.430422000  | 3.859947000  |
| H | 0.435003000  | 1.933313000  | 4.147735000  |
| H | 1.146405000  | -1.592255000 | 1.808114000  |
| C | 2.231058000  | 2.559884000  | -0.185685000 |
| H | 2.924081000  | 2.019474000  | -0.840443000 |
| C | 0.623539000  | -0.804257000 | 4.400660000  |
| H | -0.028262000 | -0.365048000 | 5.158710000  |
| H | 0.275346000  | -1.819255000 | 4.198034000  |
| H | 1.631003000  | -0.870922000 | 4.820705000  |
| C | 0.930907000  | 2.768207000  | -0.963767000 |
| H | 1.121700000  | 3.364031000  | -1.858690000 |
| H | 0.191745000  | 3.304497000  | -0.363564000 |
| H | 0.491651000  | 1.822734000  | -1.284372000 |
| C | 2.874804000  | 3.909243000  | 0.135666000  |
| H | 2.184945000  | 4.560656000  | 0.676589000  |
| H | 3.157746000  | 4.423733000  | -0.784618000 |
| H | 3.773196000  | 3.785474000  | 0.745175000  |
| H | 2.527483000  | -0.719074000 | 2.458067000  |
| H | -0.389862000 | 0.085778000  | 2.734676000  |
| C | -0.789987000 | -1.366739000 | -0.699526000 |
| O | -0.433590000 | -2.365063000 | -0.140346000 |
| C | -4.797904000 | 0.127682000  | -0.400772000 |
| C | -4.422422000 | -1.091486000 | 0.130725000  |
| C | -3.137199000 | -1.587845000 | 0.034727000  |
| C | -2.182713000 | -0.831251000 | -0.633130000 |
| C | -2.515634000 | 0.399569000  | -1.184180000 |
| C | -3.816528000 | 0.848887000  | -1.051097000 |
| H | -5.807974000 | 0.498534000  | -0.309958000 |

|   |              |              |              |
|---|--------------|--------------|--------------|
| H | -2.874817000 | -2.542007000 | 0.469816000  |
| H | -1.782822000 | 1.000422000  | -1.702765000 |
| N | -5.441479000 | -1.890445000 | 0.834319000  |
| O | -5.095699000 | -2.954831000 | 1.298768000  |
| O | -6.561746000 | -1.433229000 | 0.904419000  |
| N | -4.173486000 | 2.158716000  | -1.624263000 |
| O | -5.324698000 | 2.522198000  | -1.517902000 |
| O | -3.292661000 | 2.791483000  | -2.165180000 |

**SCF Done: E(RM062X) = -1606.27758052**

**# of imaginary frequencies = 0**

**(M)-2c**

|   |              |              |              |
|---|--------------|--------------|--------------|
| C | -1.246194000 | -1.156767000 | -1.151449000 |
| C | -2.198749000 | -0.384116000 | -0.539059000 |
| C | -2.792733000 | -2.795663000 | -1.934634000 |
| C | -1.512494000 | -2.345591000 | -1.857230000 |
| H | -3.027506000 | -3.706904000 | -2.470955000 |
| H | -0.691353000 | -2.876537000 | -2.320981000 |
| C | -3.552875000 | -0.868478000 | -0.605284000 |
| C | -3.838537000 | -2.076471000 | -1.304195000 |
| C | -5.167804000 | -2.563009000 | -1.369042000 |
| C | -6.192834000 | -1.895007000 | -0.761511000 |
| C | -5.922010000 | -0.702499000 | -0.060006000 |
| C | -4.648190000 | -0.205854000 | 0.013720000  |
| H | -5.351930000 | -3.483227000 | -1.911399000 |
| H | -7.204874000 | -2.275480000 | -0.813898000 |
| H | -6.729903000 | -0.171169000 | 0.427161000  |
| H | -4.488422000 | 0.709003000  | 0.560230000  |
| O | 0.090434000  | -0.731087000 | -1.130447000 |
| C | -1.547896000 | 2.289420000  | 2.229305000  |
| C | -1.983587000 | 0.928622000  | 1.673634000  |
| C | -1.795160000 | 0.917758000  | 0.136569000  |
| C | -2.429524000 | 2.134237000  | -0.567213000 |
| C | -1.987068000 | 3.461013000  | 0.047587000  |
| C | -2.269053000 | 3.448964000  | 1.548543000  |
| H | -0.471578000 | 2.417540000  | 2.073475000  |
| H | -1.716332000 | 2.317289000  | 3.308800000  |
| H | -3.046526000 | 0.814225000  | 1.904323000  |
| H | -0.720017000 | 1.028357000  | -0.024647000 |
| H | -3.351648000 | 3.360539000  | 1.706230000  |
| H | -1.958892000 | 4.398640000  | 1.993119000  |
| H | -2.154600000 | 2.104901000  | -1.626133000 |
| C | -1.253990000 | -0.251701000 | 2.354132000  |
| H | -1.419987000 | -1.138066000 | 1.732895000  |
| C | -2.668005000 | 4.634988000  | -0.646420000 |
| H | -2.330898000 | 5.586414000  | -0.229997000 |
| H | -3.752332000 | 4.576048000  | -0.517012000 |
| H | -2.457000000 | 4.637912000  | -1.717915000 |
| C | 0.258641000  | -0.042906000 | 2.471224000  |
| H | 0.492814000  | 0.669427000  | 3.265766000  |
| H | 0.756264000  | -0.985354000 | 2.708017000  |
| H | 0.698236000  | 0.346578000  | 1.549204000  |
| C | -1.845911000 | -0.549807000 | 3.731755000  |
| H | -1.733066000 | 0.305408000  | 4.402683000  |
| H | -2.909409000 | -0.787173000 | 3.659425000  |
| H | -1.339087000 | -1.400021000 | 4.193121000  |
| H | -3.520704000 | 2.090029000  | -0.531788000 |
| H | -0.901734000 | 3.555684000  | -0.087701000 |
| C | 0.953189000  | -1.454371000 | -0.400413000 |
| O | 0.669561000  | -2.444239000 | 0.213302000  |

|   |             |              |              |
|---|-------------|--------------|--------------|
| C | 4.907787000 | 0.202614000  | -0.369342000 |
| C | 4.583998000 | -0.951961000 | 0.317446000  |
| C | 3.315735000 | -1.498688000 | 0.308869000  |
| C | 2.323876000 | -0.860706000 | -0.424986000 |
| C | 2.603091000 | 0.303769000  | -1.128997000 |
| C | 3.890950000 | 0.805385000  | -1.082866000 |
| H | 5.905763000 | 0.614267000  | -0.347290000 |
| H | 3.093506000 | -2.400770000 | 0.861710000  |
| H | 1.839083000 | 0.813443000  | -1.697968000 |
| N | 5.640888000 | -1.621674000 | 1.095982000  |
| O | 5.340831000 | -2.632283000 | 1.693407000  |
| O | 6.744225000 | -1.120060000 | 1.090421000  |
| N | 4.195247000 | 2.042733000  | -1.823336000 |
| O | 3.285475000 | 2.575947000  | -2.420578000 |
| O | 5.335883000 | 2.450789000  | -1.788333000 |

**SCF Done: E(RM062X) = -1606.27651937**

**# of imaginary frequencies = 0**

**(P)-2c**

|   |              |              |              |
|---|--------------|--------------|--------------|
| C | 1.640571000  | -0.954913000 | -1.104148000 |
| C | 2.453969000  | -0.132774000 | -0.367422000 |
| C | 3.426578000  | -2.309521000 | -1.921766000 |
| C | 2.094252000  | -2.035161000 | -1.882388000 |
| H | 3.802657000  | -3.138098000 | -2.509285000 |
| H | 1.373524000  | -2.625739000 | -2.432564000 |
| C | 3.865158000  | -0.402579000 | -0.431282000 |
| C | 4.340975000  | -1.502458000 | -1.202062000 |
| C | 5.729727000  | -1.779496000 | -1.259524000 |
| C | 6.631372000  | -0.998130000 | -0.594704000 |
| C | 6.173354000  | 0.104428000  | 0.156370000  |
| C | 4.837581000  | 0.393019000  | 0.235758000  |
| H | 6.060815000  | -2.626591000 | -1.849059000 |
| H | 7.690367000  | -1.216452000 | -0.645338000 |
| H | 6.886179000  | 0.732519000  | 0.675645000  |
| H | 4.537920000  | 1.253719000  | 0.815183000  |
| O | 0.268927000  | -0.670633000 | -1.145461000 |
| C | 0.449881000  | 1.977752000  | 2.226463000  |
| C | 0.782995000  | 0.703326000  | 1.441919000  |
| C | 1.899662000  | 1.038729000  | 0.425091000  |
| C | 1.461954000  | 2.171232000  | -0.520499000 |
| C | 1.045126000  | 3.430527000  | 0.238842000  |
| C | -0.012691000 | 3.091609000  | 1.287884000  |
| H | 1.332213000  | 2.316477000  | 2.780233000  |
| H | -0.329682000 | 1.769630000  | 2.962190000  |
| H | -0.129002000 | 0.458230000  | 0.889894000  |
| H | 2.712740000  | 1.444969000  | 1.025846000  |
| H | -0.929674000 | 2.773710000  | 0.772798000  |
| H | -0.267391000 | 3.988920000  | 1.858355000  |
| H | 2.281649000  | 2.407114000  | -1.206163000 |
| C | 1.113339000  | -0.514834000 | 2.324852000  |
| H | 1.333932000  | -1.345735000 | 1.646665000  |
| C | 0.551049000  | 4.506235000  | -0.721866000 |
| H | 1.313565000  | 4.756987000  | -1.462265000 |
| H | 0.283333000  | 5.418971000  | -0.185533000 |
| H | -0.337226000 | 4.156408000  | -1.255572000 |
| C | 2.343390000  | -0.308604000 | 3.209658000  |
| H | 2.549536000  | -1.215270000 | 3.781972000  |
| H | 3.235930000  | -0.079899000 | 2.623326000  |
| H | 2.185064000  | 0.503450000  | 3.923221000  |
| C | -0.089013000 | -0.938376000 | 3.169219000  |

|   |              |              |              |
|---|--------------|--------------|--------------|
| H | -0.300712000 | -0.213327000 | 3.958064000  |
| H | 0.102791000  | -1.899985000 | 3.649078000  |
| H | -0.988552000 | -1.041832000 | 2.555534000  |
| H | 0.624260000  | 1.827808000  | -1.138012000 |
| H | 1.929745000  | 3.809681000  | 0.766526000  |
| C | -0.579353000 | -1.544653000 | -0.582575000 |
| O | -0.268814000 | -2.605287000 | -0.118708000 |
| C | -4.598138000 | -0.055337000 | -0.410159000 |
| C | -4.270009000 | -1.340807000 | -0.023403000 |
| C | -2.982521000 | -1.838153000 | -0.084426000 |
| C | -1.975871000 | -1.012562000 | -0.568047000 |
| C | -2.261330000 | 0.285669000  | -0.971721000 |
| C | -3.565551000 | 0.733286000  | -0.877860000 |
| H | -5.610338000 | 0.315209000  | -0.345160000 |
| H | -2.758446000 | -2.844854000 | 0.239913000  |
| H | -1.488020000 | 0.941287000  | -1.345333000 |
| N | -5.343512000 | -2.212133000 | 0.487154000  |
| O | -5.036685000 | -3.330460000 | 0.838313000  |
| O | -6.465641000 | -1.755766000 | 0.523810000  |
| N | -3.865556000 | 2.118231000  | -1.281506000 |
| O | -2.936651000 | 2.809015000  | -1.641566000 |
| O | -5.020190000 | 2.481291000  | -1.224256000 |

**SCF Done: E(RM062X) = -1606.28020802**

**# of imaginary frequencies = 0**

**(P)-2c bis**

|   |              |              |              |
|---|--------------|--------------|--------------|
| C | -1.592807000 | -0.888882000 | -1.101133000 |
| C | -2.417838000 | -0.306795000 | -0.176083000 |
| C | -3.349190000 | -2.041531000 | -2.233966000 |
| C | -2.025875000 | -1.742405000 | -2.132168000 |
| H | -3.710583000 | -2.690825000 | -3.021881000 |
| H | -1.294524000 | -2.137741000 | -2.825391000 |
| C | -3.812814000 | -0.651030000 | -0.259223000 |
| C | -4.270911000 | -1.510546000 | -1.298432000 |
| C | -5.646193000 | -1.839808000 | -1.390482000 |
| C | -6.547117000 | -1.358269000 | -0.483529000 |
| C | -6.100588000 | -0.525256000 | 0.563290000  |
| C | -4.779630000 | -0.182016000 | 0.672113000  |
| H | -5.966908000 | -2.489015000 | -2.197050000 |
| H | -7.595482000 | -1.616654000 | -0.560073000 |
| H | -6.809821000 | -0.153930000 | 1.292262000  |
| H | -4.483375000 | 0.447950000  | 1.498098000  |
| O | -0.227271000 | -0.576550000 | -1.084900000 |
| C | -0.680775000 | 2.617139000  | 1.736013000  |
| C | -0.927732000 | 1.732065000  | 0.508031000  |
| C | -1.898845000 | 0.602346000  | 0.924526000  |
| C | -1.301726000 | -0.229334000 | 2.071973000  |
| C | -0.977578000 | 0.633173000  | 3.291469000  |
| C | -0.084996000 | 1.805361000  | 2.886062000  |
| H | -1.619518000 | 3.078018000  | 2.063242000  |
| H | 0.001036000  | 3.429284000  | 1.476895000  |
| H | 0.041513000  | 1.289749000  | 0.260910000  |
| H | -2.760543000 | 1.124956000  | 1.340206000  |
| H | 0.891179000  | 1.410074000  | 2.575518000  |
| H | 0.095165000  | 2.448449000  | 3.751866000  |
| H | -2.000563000 | -1.023531000 | 2.352619000  |
| C | -1.397627000 | 2.500973000  | -0.740571000 |
| H | -1.415205000 | 1.778515000  | -1.563893000 |
| C | -0.337863000 | -0.199874000 | 4.396239000  |
| H | -0.130122000 | 0.409884000  | 5.277910000  |

|   |              |              |              |
|---|--------------|--------------|--------------|
| H | -0.987655000 | -1.024323000 | 4.697001000  |
| H | 0.608434000  | -0.625421000 | 4.050404000  |
| C | -2.808663000 | 3.076319000  | -0.604324000 |
| H | -2.869922000 | 3.773062000  | 0.235511000  |
| H | -3.558374000 | 2.296216000  | -0.456020000 |
| H | -3.078953000 | 3.625714000  | -1.508424000 |
| C | -0.411577000 | 3.602897000  | -1.131136000 |
| H | -0.465660000 | 4.447392000  | -0.440608000 |
| H | -0.639781000 | 3.980237000  | -2.129753000 |
| H | 0.618686000  | 3.236943000  | -1.135066000 |
| H | -0.384085000 | -0.723556000 | 1.729189000  |
| H | -1.923712000 | 1.044770000  | 3.666158000  |
| C | 0.619784000  | -1.501148000 | -0.612672000 |
| O | 0.302728000  | -2.594738000 | -0.236986000 |
| C | 4.661663000  | -0.080342000 | -0.432293000 |
| C | 4.291636000  | -1.319909000 | 0.053249000  |
| C | 2.995212000  | -1.792549000 | -0.007028000 |
| C | 2.021310000  | -0.985110000 | -0.580213000 |
| C | 2.348519000  | 0.267806000  | -1.084150000 |
| C | 3.663028000  | 0.687820000  | -0.997356000 |
| H | 5.681281000  | 0.270213000  | -0.373118000 |
| H | 2.738607000  | -2.766841000 | 0.384783000  |
| H | 1.601721000  | 0.903459000  | -1.538986000 |
| N | 5.329594000  | -2.169502000 | 0.663712000  |
| O | 4.988676000  | -3.252602000 | 1.086578000  |
| O | 6.459141000  | -1.732072000 | 0.704478000  |
| N | 4.017313000  | 2.016460000  | -1.526845000 |
| O | 5.173983000  | 2.366116000  | -1.436682000 |
| O | 3.128240000  | 2.677557000  | -2.018692000 |

**SCF Done: E(RM062X) = -1606.27883488**

**# of imaginary frequencies = 0**

### TS1-2c

|   |              |              |              |
|---|--------------|--------------|--------------|
| C | -2.995736000 | 3.361105000  | -0.054681000 |
| C | -2.896426000 | 1.454943000  | -1.704493000 |
| C | -1.012841000 | 1.780167000  | -0.100915000 |
| C | -1.993497000 | 2.570847000  | 0.777433000  |
| C | -1.803803000 | 0.686647000  | -0.906658000 |
| C | -3.823428000 | 2.422219000  | -0.938443000 |
| H | -5.565153000 | 1.124744000  | -0.755684000 |
| H | -4.569200000 | 1.163166000  | 0.695521000  |
| H | -0.845099000 | -2.113744000 | 2.686695000  |
| H | -1.134133000 | 0.262159000  | -1.660660000 |
| H | -2.460909000 | 4.080637000  | -0.682118000 |
| H | -3.659744000 | 3.940577000  | 0.592248000  |
| H | -2.524419000 | 1.863980000  | 1.424014000  |
| H | 1.737904000  | 1.614605000  | -0.868607000 |
| H | -5.586309000 | 2.547272000  | 0.291111000  |
| C | -2.205771000 | -0.500901000 | 0.000106000  |
| C | -2.912334000 | -2.265610000 | 2.148892000  |
| C | -1.629572000 | -1.847430000 | 1.990467000  |
| C | -1.299632000 | -1.012101000 | 0.905746000  |
| H | -1.441097000 | 3.232610000  | 1.446093000  |
| C | -0.137973000 | 2.681190000  | -1.007623000 |
| H | -0.307693000 | 1.309166000  | 0.578218000  |
| C | 0.454895000  | 3.853057000  | -0.220130000 |
| H | 0.694286000  | 0.993819000  | -2.157987000 |
| H | 1.545742000  | 2.520022000  | -2.364237000 |
| H | -0.740902000 | 3.102144000  | -1.814986000 |
| C | -4.946274000 | 1.768620000  | -0.130567000 |

|   |              |              |              |
|---|--------------|--------------|--------------|
| H | 0.978281000  | 3.487660000  | 0.669284000  |
| H | 1.178417000  | 4.391318000  | -0.835412000 |
| H | -0.303739000 | 4.566265000  | 0.102622000  |
| C | 1.016290000  | 1.898808000  | -1.639403000 |
| H | -4.311239000 | 3.028068000  | -1.709031000 |
| H | -3.490705000 | 0.809880000  | -2.339651000 |
| H | -2.334568000 | 2.068891000  | -2.411898000 |
| O | 0.070583000  | -0.712262000 | 0.861589000  |
| C | 0.789598000  | -1.204554000 | -0.157219000 |
| O | 0.341268000  | -1.804299000 | -1.093426000 |
| C | 2.244172000  | -0.906747000 | 0.012491000  |
| C | 2.726131000  | -0.226946000 | 1.124055000  |
| C | 3.106143000  | -1.306395000 | -1.000224000 |
| C | 4.080471000  | 0.042859000  | 1.192026000  |
| H | 2.065980000  | 0.094479000  | 1.916625000  |
| C | 4.449684000  | -1.010322000 | -0.877478000 |
| H | 2.728033000  | -1.830718000 | -1.866679000 |
| C | 4.972779000  | -0.333202000 | 0.207436000  |
| H | 6.026341000  | -0.108688000 | 0.281502000  |
| H | -3.205698000 | -2.865680000 | 3.001226000  |
| C | -3.479061000 | -1.190778000 | 0.008018000  |
| C | -3.851596000 | -1.995222000 | 1.126316000  |
| C | -5.131764000 | -2.602253000 | 1.176557000  |
| C | -5.987679000 | -2.533081000 | 0.114868000  |
| C | -5.565667000 | -1.877510000 | -1.058565000 |
| C | -4.363345000 | -1.224859000 | -1.104459000 |
| H | -5.396546000 | -3.162861000 | 2.065626000  |
| H | -6.955245000 | -3.016850000 | 0.152838000  |
| H | -6.192910000 | -1.896563000 | -1.941077000 |
| H | -4.065379000 | -0.786829000 | -2.039129000 |
| N | 4.598740000  | 0.771484000  | 2.363642000  |
| O | 5.790005000  | 0.990270000  | 2.405699000  |
| O | 3.800952000  | 1.107651000  | 3.211652000  |
| N | 5.369853000  | -1.427470000 | -1.950574000 |
| O | 6.544042000  | -1.157869000 | -1.818134000 |
| O | 4.894772000  | -2.013856000 | -2.898536000 |

**SCF Done: E(RM062X) = -1606.24378457**

**# of imaginary frequencies = 1 (-38.7279)**

**TS1'-2c**

|   |              |              |              |
|---|--------------|--------------|--------------|
| C | 2.703644000  | 3.265801000  | -0.828329000 |
| C | 3.023596000  | 1.878112000  | 1.270354000  |
| C | 0.912707000  | 1.680081000  | 0.000667000  |
| C | 1.651354000  | 2.237360000  | -1.224543000 |
| C | 1.911097000  | 0.860858000  | 0.884879000  |
| C | 3.728590000  | 2.650519000  | 0.132907000  |
| H | 5.531261000  | 1.428218000  | 0.018786000  |
| H | 4.341904000  | 1.039332000  | -1.220472000 |
| H | 0.767177000  | -2.871312000 | -1.698824000 |
| H | 1.400662000  | 0.597890000  | 1.815522000  |
| H | 2.215175000  | 4.122880000  | -0.355809000 |
| H | 3.216220000  | 3.649107000  | -1.714513000 |
| H | 2.126902000  | 1.401833000  | -1.749321000 |
| H | -1.220500000 | 1.302275000  | 1.668535000  |
| H | 5.288361000  | 2.523133000  | -1.346156000 |
| C | 2.291553000  | -0.492851000 | 0.234472000  |
| C | 2.880521000  | -2.738751000 | -1.445363000 |
| C | 1.595216000  | -2.362946000 | -1.223970000 |
| C | 1.326583000  | -1.268350000 | -0.375105000 |
| H | 0.938308000  | 2.666717000  | -1.929852000 |

|   |              |              |              |
|---|--------------|--------------|--------------|
| C | 0.128449000  | 2.758477000  | 0.788589000  |
| H | 0.134962000  | 1.032258000  | -0.379184000 |
| C | -0.874553000 | 3.458897000  | -0.132302000 |
| H | 0.056965000  | 1.824014000  | 2.773899000  |
| H | -1.289386000 | 2.897743000  | 2.421024000  |
| H | 0.806708000  | 3.524584000  | 1.169612000  |
| C | 4.780329000  | 1.856827000  | -0.645121000 |
| H | -1.533597000 | 2.726764000  | -0.611068000 |
| H | -1.499092000 | 4.146725000  | 0.440203000  |
| H | -0.382424000 | 4.034144000  | -0.916868000 |
| C | -0.615870000 | 2.158594000  | 1.983760000  |
| H | 4.261918000  | 3.469706000  | 0.625981000  |
| H | 3.770276000  | 1.470912000  | 1.940445000  |
| H | 2.505502000  | 2.625036000  | 1.877502000  |
| O | -0.026133000 | -1.062991000 | -0.065619000 |
| C | -0.909009000 | -0.851857000 | -1.053467000 |
| O | -0.623944000 | -0.708676000 | -2.209214000 |
| C | -2.303311000 | -0.759373000 | -0.527643000 |
| C | -2.598621000 | -1.007042000 | 0.807233000  |
| C | -3.305220000 | -0.390995000 | -1.416649000 |
| C | -3.910013000 | -0.874716000 | 1.225034000  |
| H | -1.828955000 | -1.294390000 | 1.508964000  |
| C | -4.597036000 | -0.274610000 | -0.942376000 |
| H | -3.073233000 | -0.196510000 | -2.454441000 |
| C | -4.936115000 | -0.508773000 | 0.376614000  |
| H | -5.952695000 | -0.409188000 | 0.726858000  |
| H | 3.117060000  | -3.542344000 | -2.131675000 |
| C | 3.610160000  | -1.093125000 | 0.229880000  |
| C | 3.914229000  | -2.145926000 | -0.681682000 |
| C | 5.226933000  | -2.674887000 | -0.753293000 |
| C | 6.196168000  | -2.277349000 | 0.123420000  |
| C | 5.861326000  | -1.358704000 | 1.137119000  |
| C | 4.618979000  | -0.784793000 | 1.182008000  |
| H | 5.430160000  | -3.438668000 | -1.495070000 |
| H | 7.191678000  | -2.699588000 | 0.075275000  |
| H | 6.588940000  | -1.108975000 | 1.899253000  |
| H | 4.395557000  | -0.134906000 | 2.007886000  |
| N | -4.229048000 | -1.125503000 | 2.641765000  |
| O | -5.388700000 | -1.030011000 | 2.980421000  |
| O | -3.310996000 | -1.409302000 | 3.380180000  |
| N | -5.664590000 | 0.119263000  | -1.878959000 |
| O | -6.788440000 | 0.220265000  | -1.436695000 |
| O | -5.351848000 | 0.317391000  | -3.032662000 |

**SCF Done: E(RM062X) = -1606.24204211**

**# of imaginary frequencies = 1 (-40.3388)**

### TS2-2c

|   |             |              |              |
|---|-------------|--------------|--------------|
| C | 2.575886000 | 1.407791000  | 2.844170000  |
| C | 0.653171000 | 0.988648000  | 1.242856000  |
| C | 2.781367000 | 1.867933000  | 0.355247000  |
| C | 3.493474000 | 1.371516000  | 1.623582000  |
| C | 1.600161000 | 0.911145000  | 0.008069000  |
| C | 1.285886000 | 0.614647000  | 2.597378000  |
| H | 0.634881000 | -1.465543000 | 2.513319000  |
| H | 2.352707000 | -1.255306000 | 2.173282000  |
| H | 0.581434000 | -3.639984000 | -0.137952000 |
| H | 1.060370000 | 1.327795000  | -0.846380000 |
| H | 2.329719000 | 2.446277000  | 3.083295000  |
| H | 3.094458000 | 1.002438000  | 3.717433000  |
| H | 3.840054000 | 0.347909000  | 1.453027000  |

|   |              |              |              |
|---|--------------|--------------|--------------|
| H | 2.140982000  | 3.537049000  | -1.708031000 |
| H | 1.760584000  | -1.096712000 | 3.826490000  |
| C | 1.977931000  | -0.535759000 | -0.392056000 |
| C | 2.677686000  | -3.313802000 | -0.425379000 |
| C | 1.381484000  | -2.928839000 | -0.296800000 |
| C | 1.058343000  | -1.557791000 | -0.309449000 |
| H | 4.391555000  | 1.962606000  | 1.808470000  |
| C | 2.348936000  | 3.354910000  | 0.447043000  |
| H | 3.512374000  | 1.875117000  | -0.443423000 |
| C | 3.576777000  | 4.248727000  | 0.642224000  |
| H | 0.594808000  | 3.354982000  | -0.869124000 |
| H | 1.454983000  | 4.886887000  | -0.796688000 |
| H | 1.698075000  | 3.513397000  | 1.309055000  |
| C | 1.523277000  | -0.887755000 | 2.781034000  |
| H | 4.302123000  | 4.088279000  | -0.161303000 |
| H | 3.285771000  | 5.300472000  | 0.625584000  |
| H | 4.076802000  | 4.060847000  | 1.592568000  |
| C | 1.586991000  | 3.803470000  | -0.802262000 |
| H | 0.555985000  | 0.910851000  | 3.357586000  |
| H | -0.253783000 | 0.407294000  | 1.124194000  |
| H | 0.319455000  | 2.026475000  | 1.303153000  |
| O | -0.309031000 | -1.334401000 | -0.112357000 |
| C | -0.996261000 | -0.668599000 | -1.051238000 |
| O | -0.542153000 | -0.260484000 | -2.082482000 |
| C | -2.423155000 | -0.482974000 | -0.646512000 |
| C | -2.894068000 | -0.910736000 | 0.588690000  |
| C | -3.271626000 | 0.153403000  | -1.543644000 |
| C | -4.223040000 | -0.687125000 | 0.898538000  |
| H | -2.245690000 | -1.405774000 | 1.297324000  |
| C | -4.590280000 | 0.346104000  | -1.181308000 |
| H | -2.903029000 | 0.488924000  | -2.502879000 |
| C | -5.101252000 | -0.061723000 | 0.036076000  |
| H | -6.135602000 | 0.101060000  | 0.299803000  |
| H | 2.963233000  | -4.356008000 | -0.354741000 |
| C | 3.286274000  | -0.967039000 | -0.841207000 |
| C | 3.653345000  | -2.342139000 | -0.754294000 |
| C | 4.968971000  | -2.753756000 | -1.085320000 |
| C | 5.877099000  | -1.871001000 | -1.595862000 |
| C | 5.471225000  | -0.545086000 | -1.847657000 |
| C | 4.223963000  | -0.111661000 | -1.484568000 |
| H | 5.223419000  | -3.799913000 | -0.960234000 |
| H | 6.875358000  | -2.195756000 | -1.859610000 |
| H | 6.141161000  | 0.134479000  | -2.359378000 |
| H | 3.926552000  | 0.878424000  | -1.784783000 |
| N | -4.728808000 | -1.133955000 | 2.208583000  |
| O | -5.901245000 | -0.945322000 | 2.450741000  |
| O | -3.940557000 | -1.661823000 | 2.962660000  |
| N | -5.497101000 | 1.016803000  | -2.129817000 |
| O | -6.647020000 | 1.181671000  | -1.784182000 |
| O | -5.036588000 | 1.361414000  | -3.196322000 |

**SCF Done: E(RM062X) = -1606.24487942**

**# of imaginary frequencies = 1 (-34.6321)**

**TS2'-2c**

|   |             |             |             |
|---|-------------|-------------|-------------|
| C | 2.379971000 | 1.287348000 | 2.981085000 |
| C | 0.699392000 | 1.158551000 | 1.091268000 |
| C | 3.072872000 | 1.618036000 | 0.564184000 |
| C | 3.452425000 | 1.025661000 | 1.929305000 |
| C | 1.794165000 | 0.905600000 | 0.013867000 |
| C | 1.030973000 | 0.715332000 | 2.530778000 |



|   |              |              |              |
|---|--------------|--------------|--------------|
| H | 0.054803000  | -1.235913000 | 2.414809000  |
| H | 1.806558000  | -1.316569000 | 2.251027000  |
| H | 0.285678000  | -3.539489000 | -0.449763000 |
| H | 1.472325000  | 1.428578000  | -0.891834000 |
| H | 2.290387000  | 2.364566000  | 3.149814000  |
| H | 2.667179000  | 0.843353000  | 3.938102000  |
| H | 3.599796000  | -0.052604000 | 1.808953000  |
| H | 3.314534000  | 3.338709000  | -1.550811000 |
| H | 1.082735000  | -1.007095000 | 3.827975000  |
| C | 1.995685000  | -0.572968000 | -0.398365000 |
| C | 2.401831000  | -3.390254000 | -0.613178000 |
| C | 1.143681000  | -2.887512000 | -0.496470000 |
| C | 0.963463000  | -1.490273000 | -0.403244000 |
| H | 4.414654000  | 1.423023000  | 2.254999000  |
| C | 2.943902000  | 3.162466000  | 0.583780000  |
| H | 3.921482000  | 1.441135000  | -0.084293000 |
| C | 4.242831000  | 3.797564000  | 1.087895000  |
| H | 1.601989000  | 3.466006000  | -1.126602000 |
| H | 2.687053000  | 4.808893000  | -0.800913000 |
| H | 2.149800000  | 3.473375000  | 1.265735000  |
| C | 0.992076000  | -0.797796000 | 2.759506000  |
| H | 5.096840000  | 3.448720000  | 0.498947000  |
| H | 4.193376000  | 4.883897000  | 0.995822000  |
| H | 4.436221000  | 3.564302000  | 2.135227000  |
| C | 2.611928000  | 3.720008000  | -0.802948000 |
| H | 0.248758000  | 1.148783000  | 3.162326000  |
| H | -0.264518000 | 0.754590000  | 0.805818000  |
| H | 0.551124000  | 2.240653000  | 1.110809000  |
| O | -0.339353000 | -0.988482000 | -0.435520000 |
| C | -1.383623000 | -1.557232000 | 0.178128000  |
| O | -1.350069000 | -2.527087000 | 0.882521000  |
| C | -2.638684000 | -0.794897000 | -0.107567000 |
| C | -2.635408000 | 0.357422000  | -0.884264000 |
| C | -3.820657000 | -1.265932000 | 0.450050000  |
| C | -3.833323000 | 1.017680000  | -1.086344000 |
| H | -1.724302000 | 0.737511000  | -1.323303000 |
| C | -4.987788000 | -0.567597000 | 0.210417000  |
| H | -3.821573000 | -2.159547000 | 1.058295000  |
| C | -5.031003000 | 0.581902000  | -0.555327000 |
| H | -5.954796000 | 1.113801000  | -0.727474000 |
| H | 2.570268000  | -4.460050000 | -0.627127000 |
| C | 3.261214000  | -1.106519000 | -0.849949000 |
| C | 3.486357000  | -2.512177000 | -0.844386000 |
| C | 4.758782000  | -3.033232000 | -1.190995000 |
| C | 5.750307000  | -2.216737000 | -1.654871000 |
| C | 5.475552000  | -0.846324000 | -1.843633000 |
| C | 4.276423000  | -0.312276000 | -1.454989000 |
| H | 4.909602000  | -4.104463000 | -1.122968000 |
| H | 6.713990000  | -2.622639000 | -1.934410000 |
| H | 6.208815000  | -0.212371000 | -2.326219000 |
| H | 4.071228000  | 0.717635000  | -1.700683000 |
| N | -3.834771000 | 2.245180000  | -1.901676000 |
| O | -4.898516000 | 2.797396000  | -2.081405000 |
| O | -2.771644000 | 2.627060000  | -2.340712000 |
| N | -6.245135000 | -1.062602000 | 0.798410000  |
| O | -7.257731000 | -0.440129000 | 0.561327000  |
| O | -6.188277000 | -2.061247000 | 1.482315000  |

**SCF Done: E(RM062X) = -1606.24076153**

**# of imaginary frequencies = 1 (-33.2438)**

**(M)-3b**

|   |              |              |              |
|---|--------------|--------------|--------------|
| C | 0.416024000  | -1.647110000 | 0.562111000  |
| C | 0.630870000  | -0.467911000 | -0.133253000 |
| C | 2.772173000  | -2.114506000 | 0.686149000  |
| C | 1.486427000  | -2.475033000 | 0.971539000  |
| H | 3.594687000  | -2.747805000 | 0.997367000  |
| H | 1.294721000  | -3.392881000 | 1.507873000  |
| C | 1.974147000  | -0.083688000 | -0.420488000 |
| C | 3.053139000  | -0.919010000 | -0.008405000 |
| C | 4.392260000  | -0.544184000 | -0.289870000 |
| C | 4.674163000  | 0.617857000  | -0.948202000 |
| C | 3.613309000  | 1.460188000  | -1.352100000 |
| C | 2.312303000  | 1.123594000  | -1.099067000 |
| H | 5.189244000  | -1.203791000 | 0.034646000  |
| H | 5.698370000  | 0.898241000  | -1.157962000 |
| H | 3.833354000  | 2.386851000  | -1.867658000 |
| H | 1.535958000  | 1.803771000  | -1.418149000 |
| C | -2.601596000 | 1.596676000  | 0.331196000  |
| C | -1.191221000 | 1.105592000  | 0.664260000  |
| C | -0.566799000 | 0.368276000  | -0.546814000 |
| C | -1.570500000 | -0.473511000 | -1.325697000 |
| C | -3.008901000 | -0.462849000 | -1.057010000 |
| C | -3.535293000 | 0.426809000  | 0.041978000  |
| H | -2.571911000 | 2.257081000  | -0.538905000 |
| H | -3.000364000 | 2.180305000  | 1.163939000  |
| H | -1.288020000 | 0.367053000  | 1.467032000  |
| H | -0.239112000 | 1.122995000  | -1.263110000 |
| H | -1.157895000 | -1.363642000 | -1.794461000 |
| H | -3.657533000 | -0.186755000 | 0.940642000  |
| H | -4.530637000 | 0.783856000  | -0.240211000 |
| C | -0.265258000 | 2.225777000  | 1.180486000  |
| H | 0.757312000  | 1.834319000  | 1.158029000  |
| C | -3.849909000 | -1.657951000 | -1.407250000 |
| H | -4.851411000 | -1.343061000 | -1.709710000 |
| H | -3.396582000 | -2.220733000 | -2.223279000 |
| H | -3.948585000 | -2.313823000 | -0.540093000 |
| C | -0.305131000 | 3.488278000  | 0.316832000  |
| H | 0.491584000  | 4.173796000  | 0.612005000  |
| H | -0.182546000 | 3.273421000  | -0.747145000 |
| H | -1.256239000 | 4.012141000  | 0.439577000  |
| C | -0.578727000 | 2.578513000  | 2.634892000  |
| H | 0.104162000  | 3.348253000  | 3.000492000  |
| H | -1.595606000 | 2.965228000  | 2.737988000  |
| H | -0.481784000 | 1.703675000  | 3.281041000  |
| O | -0.879738000 | -1.966314000 | 0.827196000  |
| O | -2.464790000 | 0.247694000  | -2.182343000 |
| C | -1.157190000 | -3.172752000 | 1.518540000  |
| H | -0.707796000 | -3.169732000 | 2.513615000  |
| H | -2.238945000 | -3.218374000 | 1.611885000  |
| H | -0.803950000 | -4.039779000 | 0.956772000  |

**SCF Done: E(RM062X) = -966.203261640****# of imaginary frequencies = 0****(P)-3b**

|   |             |             |              |
|---|-------------|-------------|--------------|
| C | 1.423122000 | 1.486669000 | -0.780992000 |
| C | 0.754892000 | 0.330373000 | -0.415024000 |
| C | 3.563466000 | 0.530570000 | -0.229579000 |
| C | 2.831907000 | 1.586908000 | -0.691161000 |
| H | 4.642582000 | 0.606038000 | -0.163578000 |
| H | 3.335428000 | 2.495373000 | -0.987796000 |

|   |              |              |              |
|---|--------------|--------------|--------------|
| C | 1.516625000  | -0.767422000 | 0.082716000  |
| C | 2.934189000  | -0.667671000 | 0.170940000  |
| C | 3.695042000  | -1.760852000 | 0.658930000  |
| C | 3.088639000  | -2.917672000 | 1.057020000  |
| C | 1.680899000  | -3.024253000 | 0.984950000  |
| C | 0.921353000  | -1.988243000 | 0.515852000  |
| H | 4.772876000  | -1.655121000 | 0.710218000  |
| H | 3.675737000  | -3.747504000 | 1.428969000  |
| H | 1.196504000  | -3.937662000 | 1.307658000  |
| H | -0.152435000 | -2.105379000 | 0.482978000  |
| C | -2.934182000 | 0.052320000  | 0.725785000  |
| C | -1.453051000 | 0.417256000  | 0.847786000  |
| C | -0.756899000 | 0.282236000  | -0.529503000 |
| C | -1.225210000 | -0.927544000 | -1.329420000 |
| C | -2.364480000 | -1.765582000 | -0.926234000 |
| C | -3.111886000 | -1.411821000 | 0.337196000  |
| H | -3.409593000 | 0.685585000  | -0.027342000 |
| H | -3.446941000 | 0.237173000  | 1.671827000  |
| H | -0.991593000 | -0.311492000 | 1.525509000  |
| H | -1.059367000 | 1.142079000  | -1.129094000 |
| H | -0.469621000 | -1.386796000 | -1.963272000 |
| H | -2.746847000 | -2.059962000 | 1.141294000  |
| H | -4.170131000 | -1.651129000 | 0.194853000  |
| C | -1.217634000 | 1.809503000  | 1.468822000  |
| H | -0.158587000 | 2.047603000  | 1.325424000  |
| C | -2.440876000 | -3.200270000 | -1.368680000 |
| H | -3.481515000 | -3.492690000 | -1.526282000 |
| H | -1.889578000 | -3.344717000 | -2.297724000 |
| H | -2.018460000 | -3.855015000 | -0.603517000 |
| C | -2.037185000 | 2.916181000  | 0.803590000  |
| H | -1.731354000 | 3.890874000  | 1.189619000  |
| H | -1.902559000 | 2.931973000  | -0.279295000 |
| H | -3.102333000 | 2.796175000  | 1.016599000  |
| C | -1.477939000 | 1.795117000  | 2.975654000  |
| H | -2.525812000 | 1.578320000  | 3.197060000  |
| H | -0.863485000 | 1.043197000  | 3.475403000  |
| H | -1.245569000 | 2.767998000  | 3.413680000  |
| O | 0.661976000  | 2.523828000  | -1.225428000 |
| O | -2.494089000 | -0.798529000 | -1.976519000 |
| C | 1.292561000  | 3.765422000  | -1.491516000 |
| H | 0.493885000  | 4.450248000  | -1.763686000 |
| H | 1.808170000  | 4.141729000  | -0.605497000 |
| H | 1.997367000  | 3.683361000  | -2.321230000 |

**SCF Done: E(RM062X) = -966.204060191**

**# of imaginary frequencies = 0**

### TS1-3b

|   |              |              |              |
|---|--------------|--------------|--------------|
| C | 0.909132000  | -3.033024000 | 1.375586000  |
| C | -0.380192000 | -1.750194000 | -0.460556000 |
| C | -0.130603000 | -2.037018000 | 0.953971000  |
| C | -0.775886000 | -0.314537000 | -0.824493000 |
| C | 0.413727000  | 0.646902000  | -0.554679000 |
| C | -0.454396000 | -0.914110000 | 1.915879000  |
| C | 2.468594000  | 2.175448000  | 0.683208000  |
| C | 0.231291000  | 1.975488000  | -0.201132000 |
| C | 1.241783000  | 2.720039000  | 0.460014000  |
| O | -0.939456000 | 2.591992000  | -0.526906000 |
| C | -1.762873000 | -0.193816000 | 1.547707000  |
| C | -2.026874000 | 0.035465000  | 0.028429000  |
| C | -3.485476000 | -0.739483000 | -1.947494000 |

|   |              |              |              |
|---|--------------|--------------|--------------|
| C | -3.339118000 | -0.651208000 | -0.428928000 |
| C | -4.523608000 | 0.132652000  | 0.144022000  |
| O | -1.290972000 | -2.558348000 | 0.297689000  |
| H | 0.604092000  | -3.543931000 | 2.291645000  |
| H | 1.852991000  | -2.517588000 | 1.569424000  |
| H | 0.128059000  | -2.352201000 | -1.198669000 |
| H | 1.072255000  | -3.773537000 | 0.592030000  |
| H | -1.039752000 | -0.263526000 | -1.882932000 |
| H | -0.538543000 | -1.320932000 | 2.927699000  |
| H | -2.588221000 | -0.786626000 | 1.947239000  |
| H | 0.392312000  | -0.221357000 | 1.928515000  |
| H | -3.336426000 | 0.240590000  | -2.412011000 |
| H | -2.773844000 | -1.437871000 | -2.391426000 |
| H | -2.221987000 | 1.089434000  | -0.120167000 |
| H | -1.786260000 | 0.760050000  | 2.080164000  |
| H | -4.572855000 | 1.127330000  | -0.310096000 |
| H | -4.489259000 | -1.081392000 | -2.208707000 |
| H | -3.368696000 | -1.662839000 | -0.023822000 |
| H | -4.441234000 | 0.263209000  | 1.224888000  |
| H | -5.466581000 | -0.377873000 | -0.061842000 |
| H | 1.024003000  | 3.721707000  | 0.803330000  |
| C | 1.779898000  | 0.189332000  | -0.567452000 |
| C | 2.789916000  | 0.918756000  | 0.120722000  |
| C | 4.115748000  | 0.420836000  | 0.183343000  |
| C | 4.474711000  | -0.714685000 | -0.486012000 |
| C | 3.515028000  | -1.370982000 | -1.285522000 |
| C | 2.217715000  | -0.935954000 | -1.321177000 |
| H | 4.848198000  | 0.983414000  | 0.751230000  |
| H | 5.492081000  | -1.081954000 | -0.444645000 |
| H | 3.811029000  | -2.215180000 | -1.895925000 |
| H | 1.535257000  | -1.415237000 | -2.004811000 |
| H | 3.226914000  | 2.725376000  | 1.227765000  |
| C | -1.418166000 | 3.635815000  | 0.312949000  |
| H | -2.470480000 | 3.760504000  | 0.067071000  |
| H | -1.318810000 | 3.364441000  | 1.365904000  |
| H | -0.892941000 | 4.572506000  | 0.121557000  |

**SCF Done: E(RM062X) = -966.167967251**

**# of imaginary frequencies = 1 (-34.7622)**

### TS2-3b

|   |              |              |              |
|---|--------------|--------------|--------------|
| C | 1.287593000  | 2.711408000  | 2.067318000  |
| C | 1.547012000  | 1.297200000  | -0.087598000 |
| C | 1.401174000  | 1.387765000  | 1.368165000  |
| C | -1.150758000 | 1.527181000  | -0.880568000 |
| C | -2.439465000 | 1.904965000  | -0.436912000 |
| C | 0.905034000  | 0.080615000  | -0.776995000 |
| C | -0.638025000 | 0.251454000  | -0.695747000 |
| C | 0.761508000  | 0.192353000  | 2.040573000  |
| C | -3.256264000 | 0.978664000  | 0.135485000  |
| C | 1.244418000  | -1.145360000 | 1.452731000  |
| C | 1.474241000  | -1.180211000 | -0.086973000 |
| C | 3.322076000  | -1.206373000 | -1.887095000 |
| C | 2.954775000  | -1.497035000 | -0.432816000 |
| C | 3.220471000  | -2.975063000 | -0.132549000 |
| O | 2.671405000  | 1.093559000  | 0.780277000  |
| H | 1.785473000  | 2.672893000  | 3.039074000  |
| H | 0.236087000  | 2.954255000  | 2.237517000  |
| H | 1.645220000  | 2.208041000  | -0.657659000 |
| H | 1.739230000  | 3.503529000  | 1.469308000  |
| H | -2.761848000 | 2.932389000  | -0.530474000 |

|   |              |              |              |
|---|--------------|--------------|--------------|
| H | 1.191611000  | 0.074682000  | -1.830222000 |
| H | 0.986453000  | 0.217788000  | 3.110655000  |
| H | 2.187031000  | -1.401339000 | 1.940394000  |
| H | -0.323796000 | 0.296194000  | 1.948571000  |
| H | 2.623548000  | -1.695432000 | -2.573656000 |
| H | 3.322958000  | -0.137350000 | -2.106949000 |
| H | 0.948464000  | -2.040311000 | -0.477244000 |
| H | 0.527905000  | -1.919121000 | 1.737934000  |
| H | 2.655238000  | -3.609694000 | -0.822121000 |
| H | 4.321779000  | -1.588827000 | -2.103699000 |
| H | 3.599686000  | -0.896285000 | 0.207305000  |
| H | 2.927147000  | -3.243300000 | 0.884401000  |
| H | 4.279655000  | -3.212204000 | -0.250102000 |
| O | -0.362336000 | 2.431934000  | -1.526029000 |
| C | -1.597152000 | -0.767557000 | -0.351258000 |
| C | -2.880418000 | -0.382978000 | 0.144963000  |
| C | -3.807220000 | -1.361874000 | 0.585741000  |
| C | -3.539943000 | -2.694879000 | 0.464993000  |
| C | -2.339023000 | -3.091419000 | -0.159189000 |
| C | -1.409012000 | -2.167088000 | -0.552340000 |
| H | -4.752381000 | -1.021429000 | 0.993506000  |
| H | -4.256989000 | -3.436365000 | 0.792898000  |
| H | -2.158253000 | -4.140582000 | -0.358150000 |
| H | -0.558484000 | -2.522421000 | -1.108308000 |
| H | -4.225618000 | 1.263380000  | 0.526873000  |
| C | -0.523888000 | 3.811036000  | -1.221093000 |
| H | 0.356964000  | 4.312377000  | -1.615944000 |
| H | -1.413213000 | 4.223396000  | -1.699714000 |
| H | -0.579234000 | 3.964965000  | -0.141180000 |

**SCF Done: E(RM062X) = -966.167328284**

**# of imaginary frequencies = 1 (-37.7086)**

**(M)-3c bis**

|   |              |              |              |
|---|--------------|--------------|--------------|
| C | -1.531689000 | -1.247813000 | -0.770474000 |
| C | -2.396583000 | -0.564474000 | 0.041253000  |
| C | -3.208861000 | -2.695684000 | -1.649787000 |
| C | -1.905618000 | -2.305535000 | -1.619451000 |
| H | -3.526562000 | -3.506134000 | -2.294224000 |
| H | -1.151573000 | -2.783624000 | -2.230929000 |
| C | -3.774193000 | -0.967035000 | 0.006221000  |
| C | -4.171077000 | -2.039009000 | -0.843033000 |
| C | -5.529655000 | -2.438882000 | -0.886810000 |
| C | -6.473354000 | -1.806644000 | -0.127694000 |
| C | -6.090512000 | -0.740212000 | 0.712324000  |
| C | -4.784965000 | -0.333662000 | 0.777782000  |
| H | -5.804094000 | -3.258560000 | -1.540649000 |
| H | -7.509282000 | -2.117745000 | -0.168502000 |
| H | -6.837112000 | -0.236344000 | 1.313052000  |
| H | -4.537081000 | 0.487902000  | 1.432888000  |
| C | -0.851691000 | 2.865148000  | 0.975820000  |
| C | -1.563607000 | 1.843501000  | 0.084943000  |
| C | -1.894610000 | 0.574987000  | 0.908670000  |
| C | -0.735525000 | 0.138616000  | 1.803858000  |
| C | 0.431940000  | 0.998467000  | 2.087505000  |
| C | 0.510348000  | 2.356133000  | 1.432608000  |
| H | -1.469103000 | 3.081949000  | 1.851198000  |
| H | -0.719911000 | 3.805154000  | 0.436336000  |
| H | -0.861494000 | 1.543833000  | -0.702032000 |
| H | -2.681076000 | 0.843378000  | 1.614471000  |
| H | -0.613967000 | -0.936270000 | 1.925878000  |

|   |              |              |              |
|---|--------------|--------------|--------------|
| H | 1.186271000  | 2.282225000  | 0.573832000  |
| H | 0.972588000  | 3.056182000  | 2.135251000  |
| C | -2.811046000 | 2.423859000  | -0.612838000 |
| H | -3.394053000 | 1.580376000  | -0.996802000 |
| C | 1.737313000  | 0.420789000  | 2.568439000  |
| H | 2.069647000  | 0.981306000  | 3.445302000  |
| H | 1.629701000  | -0.628376000 | 2.846892000  |
| H | 2.513965000  | 0.511849000  | 1.807694000  |
| C | -3.709304000 | 3.227608000  | 0.330101000  |
| H | -4.658807000 | 3.455216000  | -0.157649000 |
| H | -3.930657000 | 2.694992000  | 1.257352000  |
| H | -3.238035000 | 4.175839000  | 0.599377000  |
| C | -2.415391000 | 3.281231000  | -1.815439000 |
| H | -3.302554000 | 3.673510000  | -2.316488000 |
| H | -1.805609000 | 4.134641000  | -1.508678000 |
| H | -1.843827000 | 2.699747000  | -2.541617000 |
| O | -0.198297000 | -0.824995000 | -0.816033000 |
| C | 0.745943000  | -1.657410000 | -0.350278000 |
| O | 0.533106000  | -2.733744000 | 0.131768000  |
| C | 4.661716000  | 0.071091000  | -0.536546000 |
| C | 4.433199000  | -1.183139000 | -0.002117000 |
| C | 3.180015000  | -1.761839000 | 0.045253000  |
| C | 2.103905000  | -1.051931000 | -0.471389000 |
| C | 2.287682000  | 0.206630000  | -1.029123000 |
| C | 3.563820000  | 0.738764000  | -1.042640000 |
| H | 5.649015000  | 0.508375000  | -0.553981000 |
| H | 3.033112000  | -2.738393000 | 0.485383000  |
| H | 1.458999000  | 0.766897000  | -1.437915000 |
| O | -0.633867000 | 0.855710000  | 3.033293000  |
| N | 3.758987000  | 2.087963000  | -1.602474000 |
| O | 2.768798000  | 2.697994000  | -1.944651000 |
| O | 4.893845000  | 2.504443000  | -1.679012000 |
| N | 5.580105000  | -1.926178000 | 0.551328000  |
| O | 5.361781000  | -3.020240000 | 1.023414000  |
| O | 6.668212000  | -1.395638000 | 0.498673000  |

**SCF Done: E(RM062X) = -1680.27322377**

**# of imaginary frequencies = 0**

**(M)-3c**

|   |              |              |              |
|---|--------------|--------------|--------------|
| C | -1.526583000 | -0.113131000 | -1.440817000 |
| C | -2.439469000 | -0.345709000 | -0.448134000 |
| C | -3.175177000 | 0.306173000  | -3.112927000 |
| C | -1.862570000 | 0.206591000  | -2.769382000 |
| H | -3.462644000 | 0.550693000  | -4.128142000 |
| H | -1.069839000 | 0.363765000  | -3.489485000 |
| C | -3.826576000 | -0.237944000 | -0.804756000 |
| C | -4.185344000 | 0.091881000  | -2.142662000 |
| C | -5.551565000 | 0.208448000  | -2.499392000 |
| C | -6.538534000 | 0.015760000  | -1.574551000 |
| C | -6.192928000 | -0.305405000 | -0.245417000 |
| C | -4.881520000 | -0.429854000 | 0.127272000  |
| H | -5.795933000 | 0.457765000  | -3.525469000 |
| H | -7.579774000 | 0.109281000  | -1.855067000 |
| H | -6.973106000 | -0.455512000 | 0.490095000  |
| H | -4.663676000 | -0.674799000 | 1.155978000  |
| C | -0.724853000 | 0.075451000  | 3.002327000  |
| C | -1.390491000 | 0.531320000  | 1.701810000  |
| C | -1.979893000 | -0.689823000 | 0.956319000  |
| C | -1.041240000 | -1.894954000 | 0.964133000  |
| C | 0.144509000  | -1.982562000 | 1.833259000  |

|   |              |              |              |
|---|--------------|--------------|--------------|
| C | 0.482376000  | -0.812550000 | 2.724640000  |
| H | -1.446501000 | -0.472930000 | 3.612956000  |
| H | -0.406963000 | 0.943300000  | 3.583638000  |
| H | -0.603950000 | 0.957681000  | 1.069724000  |
| H | -2.844153000 | -1.028760000 | 1.527750000  |
| H | -1.050890000 | -2.505790000 | 0.064711000  |
| H | 1.268647000  | -0.230338000 | 2.230814000  |
| H | 0.909211000  | -1.192956000 | 3.657573000  |
| C | -2.439520000 | 1.641599000  | 1.915767000  |
| H | -3.037537000 | 1.707178000  | 1.000840000  |
| C | 1.280810000  | -2.910679000 | 1.502575000  |
| H | 1.586039000  | -3.443780000 | 2.406150000  |
| H | 0.988933000  | -3.640172000 | 0.746879000  |
| H | 2.145518000  | -2.353118000 | 1.142086000  |
| C | -3.388631000 | 1.354839000  | 3.080972000  |
| H | -4.215538000 | 2.067204000  | 3.077379000  |
| H | -3.814254000 | 0.350015000  | 3.038965000  |
| H | -2.868805000 | 1.453004000  | 4.036985000  |
| C | -1.763913000 | 2.999510000  | 2.108534000  |
| H | -1.143258000 | 3.252745000  | 1.246434000  |
| H | -2.510242000 | 3.786299000  | 2.234749000  |
| H | -1.128547000 | 3.001940000  | 2.997746000  |
| O | -0.163009000 | -0.259946000 | -1.151040000 |
| C | 0.583533000  | 0.856719000  | -1.132655000 |
| O | 0.152333000  | 1.967519000  | -1.262384000 |
| C | 4.742237000  | 0.063380000  | -0.471228000 |
| C | 4.211438000  | 1.336733000  | -0.390891000 |
| C | 2.874128000  | 1.606383000  | -0.604947000 |
| C | 2.024757000  | 0.548079000  | -0.902609000 |
| C | 2.512772000  | -0.749199000 | -0.990206000 |
| C | 3.863754000  | -0.957124000 | -0.776635000 |
| H | 1.861128000  | -1.579205000 | -1.224654000 |
| O | -1.072206000 | -2.661239000 | 2.170014000  |
| N | 5.117362000  | 2.452220000  | -0.063377000 |
| O | 6.287354000  | 2.190207000  | 0.112825000  |
| O | 4.634946000  | 3.561232000  | 0.009708000  |
| N | 4.390821000  | -2.330047000 | -0.868870000 |
| O | 5.580977000  | -2.486980000 | -0.703945000 |
| O | 3.597783000  | -3.217474000 | -1.099082000 |
| H | 2.492123000  | 2.615703000  | -0.540769000 |
| H | 5.792249000  | -0.124568000 | -0.303292000 |

**SCF Done: E(RM062X) = -1680.27149182**

**# of imaginary frequencies = 0**

**(P)-3c**

|   |              |              |              |
|---|--------------|--------------|--------------|
| C | -1.083222000 | -1.719345000 | 0.326473000  |
| C | -2.019019000 | -0.758319000 | 0.052896000  |
| C | -2.688088000 | -3.471887000 | 0.545264000  |
| C | -1.386730000 | -3.070567000 | 0.570954000  |
| H | -2.949563000 | -4.506919000 | 0.728294000  |
| H | -0.577964000 | -3.759367000 | 0.777464000  |
| C | -3.391694000 | -1.172443000 | 0.042788000  |
| C | -3.719016000 | -2.535713000 | 0.285032000  |
| C | -5.075348000 | -2.947412000 | 0.267091000  |
| C | -6.078015000 | -2.051643000 | 0.024978000  |
| C | -5.762472000 | -0.695731000 | -0.207537000 |
| C | -4.462283000 | -0.269232000 | -0.198817000 |
| H | -5.299279000 | -3.991726000 | 0.451359000  |
| H | -7.110978000 | -2.374891000 | 0.013506000  |
| H | -6.557494000 | 0.015629000  | -0.392651000 |

|   |              |              |              |
|---|--------------|--------------|--------------|
| H | -4.256342000 | 0.776853000  | -0.373704000 |
| C | -1.816025000 | 3.070101000  | 0.555633000  |
| C | -1.896143000 | 1.604211000  | 0.987300000  |
| C | -1.599210000 | 0.673191000  | -0.215190000 |
| C | -2.159261000 | 1.172034000  | -1.542308000 |
| C | -2.782037000 | 2.494375000  | -1.700398000 |
| C | -2.870379000 | 3.400258000  | -0.495453000 |
| H | -0.824860000 | 3.282638000  | 0.148190000  |
| H | -1.954346000 | 3.720574000  | 1.421411000  |
| H | -2.926005000 | 1.412175000  | 1.310233000  |
| H | -0.516891000 | 0.682412000  | -0.360778000 |
| H | -2.448138000 | 0.393342000  | -2.244983000 |
| H | -3.873931000 | 3.302059000  | -0.067537000 |
| H | -2.770942000 | 4.436819000  | -0.830798000 |
| C | -0.982266000 | 1.273655000  | 2.186452000  |
| H | -0.938336000 | 0.182448000  | 2.267334000  |
| C | -3.791897000 | 2.726084000  | -2.789054000 |
| H | -3.717029000 | 3.750025000  | -3.161645000 |
| H | -3.628559000 | 2.036318000  | -3.616853000 |
| H | -4.802998000 | 2.579919000  | -2.403223000 |
| C | 0.447850000  | 1.789385000  | 2.013351000  |
| H | 1.094286000  | 1.381579000  | 2.793712000  |
| H | 0.876862000  | 1.514829000  | 1.046496000  |
| H | 0.481672000  | 2.878517000  | 2.092926000  |
| C | -1.573488000 | 1.797850000  | 3.495141000  |
| H | -1.649946000 | 2.887702000  | 3.487199000  |
| H | -2.570672000 | 1.388447000  | 3.668567000  |
| H | -0.940360000 | 1.519138000  | 4.339786000  |
| O | 0.266551000  | -1.361656000 | 0.447045000  |
| C | 1.006117000  | -1.347962000 | -0.673509000 |
| O | 0.594653000  | -1.628575000 | -1.763493000 |
| C | 5.028463000  | -0.042134000 | 0.028420000  |
| C | 4.569182000  | -0.372507000 | -1.232324000 |
| C | 3.278052000  | -0.801077000 | -1.472076000 |
| C | 2.405993000  | -0.909089000 | -0.396692000 |
| C | 2.826131000  | -0.593276000 | 0.889331000  |
| C | 4.127910000  | -0.164015000 | 1.068175000  |
| H | 6.040765000  | 0.296399000  | 0.191877000  |
| H | 2.948764000  | -1.044834000 | -2.472486000 |
| H | 2.157383000  | -0.674333000 | 1.733946000  |
| O | -1.444242000 | 2.245530000  | -2.153295000 |
| N | 4.573548000  | 0.189915000  | 2.427226000  |
| O | 3.758802000  | 0.110735000  | 3.321092000  |
| O | 5.725053000  | 0.541244000  | 2.566183000  |
| N | 5.500441000  | -0.254499000 | -2.368255000 |
| O | 5.082264000  | -0.546590000 | -3.467329000 |
| O | 6.626712000  | 0.126010000  | -2.132199000 |

**SCF Done: E(RM062X) = -1680.27217783**

**# of imaginary frequencies = 0**

**(P)-3c bis**

|   |              |              |              |
|---|--------------|--------------|--------------|
| C | -1.021473000 | -1.385140000 | -0.970004000 |
| C | -2.045267000 | -0.605318000 | -0.501774000 |
| C | -2.455531000 | -3.183916000 | -1.609199000 |
| C | -1.200026000 | -2.664712000 | -1.531387000 |
| H | -2.619009000 | -4.165042000 | -2.037998000 |
| H | -0.336913000 | -3.209214000 | -1.890875000 |
| C | -3.369224000 | -1.152290000 | -0.575640000 |
| C | -3.567612000 | -2.446161000 | -1.131148000 |
| C | -4.875245000 | -2.986457000 | -1.206943000 |



|   |              |              |              |
|---|--------------|--------------|--------------|
| C | -5.953619000 | -2.282040000 | -0.750216000 |
| C | -5.765200000 | -0.999033000 | -0.194250000 |
| C | -4.513790000 | -0.450856000 | -0.109544000 |
| H | -5.001511000 | -3.973744000 | -1.635904000 |
| H | -6.949021000 | -2.702874000 | -0.811208000 |
| H | -6.618888000 | -0.442181000 | 0.171101000  |
| H | -4.404378000 | 0.532087000  | 0.325958000  |
| C | -1.909852000 | 2.240609000  | 2.115830000  |
| C | -1.883007000 | 0.794115000  | 1.617948000  |
| C | -1.764093000 | 0.768569000  | 0.073188000  |
| C | -2.592995000 | 1.843324000  | -0.621374000 |
| C | -3.273007000 | 2.924834000  | 0.107185000  |
| C | -3.146794000 | 2.976423000  | 1.610886000  |
| H | -1.013123000 | 2.765062000  | 1.776530000  |
| H | -1.900955000 | 2.260601000  | 3.207250000  |
| H | -2.841899000 | 0.335996000  | 1.887119000  |
| H | -0.731090000 | 1.018758000  | -0.176543000 |
| H | -2.994274000 | 1.565730000  | -1.593622000 |
| H | -4.049793000 | 2.532474000  | 2.043531000  |
| H | -3.129520000 | 4.024759000  | 1.923221000  |
| C | -0.784146000 | -0.059891000 | 2.281124000  |
| H | -0.726620000 | -0.998814000 | 1.720984000  |
| C | -4.484464000 | 3.587539000  | -0.486443000 |
| H | -5.394997000 | 3.112918000  | -0.114921000 |
| H | -4.468012000 | 3.513443000  | -1.573647000 |
| H | -4.513933000 | 4.642336000  | -0.204470000 |
| C | 0.596466000  | 0.599023000  | 2.247918000  |
| H | 1.364538000  | -0.116612000 | 2.551169000  |
| H | 0.860960000  | 0.975003000  | 1.256280000  |
| H | 0.640643000  | 1.443566000  | 2.939720000  |
| C | -1.153104000 | -0.426206000 | 3.718887000  |
| H | -2.112036000 | -0.946737000 | 3.758577000  |
| H | -0.393980000 | -1.080240000 | 4.152543000  |
| H | -1.221277000 | 0.462201000  | 4.351010000  |
| O | 0.276637000  | -0.859244000 | -0.959611000 |
| C | 1.210961000  | -1.479246000 | -0.221639000 |
| O | 1.016009000  | -2.446554000 | 0.458873000  |
| C | 5.047921000  | 0.421302000  | -0.450454000 |
| C | 3.972760000  | 0.903826000  | -1.170217000 |
| C | 2.719523000  | 0.320611000  | -1.134483000 |
| C | 2.537536000  | -0.802027000 | -0.336813000 |
| C | 3.591616000  | -1.322073000 | 0.403087000  |
| C | 4.821409000  | -0.698190000 | 0.327117000  |
| H | 6.017263000  | 0.895076000  | -0.493371000 |
| H | 1.907387000  | 0.737361000  | -1.712578000 |
| H | 3.446850000  | -2.193883000 | 1.025744000  |
| O | -2.045451000 | 3.161725000  | -0.594908000 |
| N | 5.944012000  | -1.244178000 | 1.110308000  |
| O | 5.727193000  | -2.221735000 | 1.792648000  |
| O | 7.013914000  | -0.681484000 | 1.023243000  |
| N | 4.174249000  | 2.096791000  | -2.011852000 |
| O | 3.224130000  | 2.501275000  | -2.645976000 |
| O | 5.277230000  | 2.599010000  | -2.017348000 |

**SCF Done: E(RM062X) = -1680.27285261**

**# of imaginary frequencies = 0**

### TS1-3c

|   |              |             |              |
|---|--------------|-------------|--------------|
| C | -4.959778000 | 2.371021000 | 0.680271000  |
| C | -2.831407000 | 1.811178000 | -0.678642000 |
| C | -3.484160000 | 2.116338000 | 0.597055000  |

|   |              |              |              |
|---|--------------|--------------|--------------|
| C | -1.640840000 | 0.845516000  | -0.645127000 |
| C | -2.102252000 | -0.584354000 | -0.259503000 |
| C | -2.792868000 | 1.563424000  | 1.825404000  |
| C | -3.089673000 | -2.921321000 | 1.066900000  |
| C | -1.288742000 | -1.499057000 | 0.372108000  |
| C | -1.761453000 | -2.639152000 | 1.056084000  |
| O | 0.098689000  | -1.364587000 | 0.475116000  |
| C | -1.268697000 | 1.737444000  | 1.744667000  |
| C | -0.613943000 | 1.442360000  | 0.360053000  |
| C | 0.578732000  | 2.534501000  | -1.644224000 |
| C | 0.171675000  | 2.666478000  | -0.176866000 |
| C | 1.431116000  | 2.854223000  | 0.674398000  |
| O | -2.696843000 | 3.103889000  | -0.077048000 |
| H | -5.178562000 | 3.107929000  | 1.456114000  |
| H | -5.477900000 | 1.443241000  | 0.934175000  |
| H | -3.414449000 | 1.880069000  | -1.584034000 |
| H | -5.342380000 | 2.733632000  | -0.274154000 |
| H | -1.185377000 | 0.788615000  | -1.635809000 |
| H | -3.167952000 | 2.078192000  | 2.714135000  |
| H | -1.040098000 | 2.770948000  | 2.010948000  |
| H | -3.071550000 | 0.511074000  | 1.935466000  |
| H | 1.084505000  | 1.580046000  | -1.827852000 |
| H | -0.275415000 | 2.599043000  | -2.320205000 |
| H | 0.160532000  | 0.709210000  | 0.540267000  |
| H | -0.810366000 | 1.110990000  | 2.512829000  |
| H | 2.134504000  | 2.033798000  | 0.495843000  |
| H | 1.273256000  | 3.332904000  | -1.912982000 |
| H | -0.451489000 | 3.554469000  | -0.071574000 |
| H | 1.205935000  | 2.875335000  | 1.742380000  |
| H | 1.937930000  | 3.786238000  | 0.417923000  |
| H | -1.039884000 | -3.246319000 | 1.586732000  |
| C | 2.257979000  | -0.953884000 | -0.332435000 |
| C | 3.119646000  | -0.728850000 | -1.398889000 |
| C | 2.719880000  | -0.885548000 | 0.976456000  |
| C | 4.441671000  | -0.435763000 | -1.127707000 |
| H | 2.757036000  | -0.775404000 | -2.416434000 |
| C | 4.054262000  | -0.590729000 | 1.186717000  |
| H | 2.059345000  | -1.049521000 | 1.815618000  |
| C | 4.944488000  | -0.357685000 | 0.157033000  |
| H | 5.981470000  | -0.123515000 | 0.346492000  |
| C | 0.821253000  | -1.215948000 | -0.646436000 |
| O | 0.383053000  | -1.251742000 | -1.760885000 |
| N | 4.551107000  | -0.510352000 | 2.572110000  |
| O | 5.727523000  | -0.267602000 | 2.731940000  |
| O | 3.751562000  | -0.691075000 | 3.464525000  |
| N | 5.359244000  | -0.187080000 | -2.254095000 |
| O | 6.511993000  | 0.076601000  | -1.989170000 |
| O | 4.903028000  | -0.261393000 | -3.374057000 |
| C | -3.456609000 | -1.046108000 | -0.474186000 |
| C | -3.963382000 | -2.158767000 | 0.254577000  |
| C | -5.318519000 | -2.547940000 | 0.110084000  |
| C | -6.135348000 | -1.932723000 | -0.795525000 |
| C | -5.602477000 | -0.928050000 | -1.628310000 |
| C | -4.311700000 | -0.500220000 | -1.469772000 |
| H | -5.681695000 | -3.372130000 | 0.713022000  |
| H | -7.165554000 | -2.244524000 | -0.909416000 |
| H | -6.211198000 | -0.503440000 | -2.416649000 |
| H | -3.919865000 | 0.210135000  | -2.178293000 |
| H | -3.478401000 | -3.760027000 | 1.630881000  |

**SCF Done: E(RM062X) = -1680.23899719**

# of imaginary frequencies = 1 (-20.0296)

TS1<sup>o</sup>-3c

|   |              |              |              |
|---|--------------|--------------|--------------|
| C | 4.919130000  | 1.898805000  | -1.638315000 |
| C | 2.964224000  | 1.939186000  | 0.057417000  |
| C | 3.462720000  | 1.758279000  | -1.309069000 |
| C | 1.770952000  | 1.076218000  | 0.484465000  |
| C | 2.168717000  | -0.426162000 | 0.561422000  |
| C | 2.624732000  | 0.854394000  | -2.189619000 |
| C | 2.920862000  | -3.147535000 | 0.089198000  |
| C | 1.261097000  | -1.450757000 | 0.411012000  |
| C | 1.612347000  | -2.796153000 | 0.165881000  |
| O | -0.105583000 | -1.209262000 | 0.591524000  |
| C | 1.120744000  | 1.113999000  | -2.007632000 |
| C | 0.639343000  | 1.353823000  | -0.544750000 |
| C | -0.279473000 | 3.142597000  | 1.064780000  |
| C | -0.057568000 | 2.730950000  | -0.389805000 |
| C | -1.410677000 | 2.674299000  | -1.106127000 |
| O | 2.769121000  | 2.953035000  | -0.935367000 |
| H | 5.046398000  | 2.320572000  | -2.637711000 |
| H | 5.396443000  | 0.916302000  | -1.618418000 |
| H | 3.647357000  | 2.289715000  | 0.815556000  |
| H | 5.417596000  | 2.542866000  | -0.913346000 |
| H | 1.433684000  | 1.381666000  | 1.476980000  |
| H | 2.894626000  | 1.020478000  | -3.236089000 |
| H | 0.866377000  | 1.999020000  | -2.593550000 |
| H | 2.881940000  | -0.184948000 | -1.964653000 |
| H | -0.782540000 | 2.347455000  | 1.625650000  |
| H | 0.654946000  | 3.380136000  | 1.576038000  |
| H | -0.164777000 | 0.663937000  | -0.335636000 |
| H | 0.573129000  | 0.279623000  | -2.449583000 |
| H | -2.093099000 | 2.000498000  | -0.576782000 |
| H | -0.914209000 | 4.029846000  | 1.109571000  |
| H | 0.555953000  | 3.490852000  | -0.872919000 |
| H | -1.316564000 | 2.314843000  | -2.132733000 |
| H | -1.876261000 | 3.661076000  | -1.136011000 |
| H | 0.821498000  | -3.518577000 | 0.017102000  |
| C | -2.349059000 | -1.047274000 | -0.059490000 |
| C | -3.343237000 | -1.231919000 | -1.011834000 |
| C | -2.636481000 | -0.434860000 | 1.154301000  |
| C | -4.620841000 | -0.794004000 | -0.722965000 |
| H | -3.115785000 | -1.700764000 | -1.959011000 |
| C | -3.932198000 | -0.011697000 | 1.385359000  |
| H | -1.871001000 | -0.280958000 | 1.901071000  |
| C | -4.950869000 | -0.174235000 | 0.467345000  |
| H | -5.955080000 | 0.168020000  | 0.668529000  |
| C | -0.959658000 | -1.463976000 | -0.413740000 |
| O | -0.651949000 | -1.917050000 | -1.479293000 |
| N | -4.240566000 | 0.655775000  | 2.662603000  |
| O | -5.385771000 | 1.004540000  | 2.850323000  |
| O | -3.328361000 | 0.816259000  | 3.444050000  |
| N | -5.681341000 | -0.984635000 | -1.728725000 |
| O | -6.791190000 | -0.581916000 | -1.455383000 |
| O | -5.376817000 | -1.532303000 | -2.765684000 |
| C | 3.536934000  | -0.863399000 | 0.748067000  |
| C | 3.915546000  | -2.196178000 | 0.421905000  |
| C | 5.271601000  | -2.597267000 | 0.513953000  |
| C | 6.224468000  | -1.751968000 | 1.007333000  |
| C | 5.834878000  | -0.481766000 | 1.476421000  |
| C | 4.539865000  | -0.055497000 | 1.349355000  |

|   |             |              |              |
|---|-------------|--------------|--------------|
| H | 5.527841000 | -3.607132000 | 0.215213000  |
| H | 7.256316000 | -2.069210000 | 1.085922000  |
| H | 6.560065000 | 0.158804000  | 1.962351000  |
| H | 4.271993000 | 0.886631000  | 1.795276000  |
| H | 3.212297000 | -4.162572000 | -0.150514000 |

**SCF Done: E(RM062X) = -1680.23672562**

**# of imaginary frequencies = 1 (-31.1701)**

**TS2-3c**

|   |              |              |              |
|---|--------------|--------------|--------------|
| C | 0.748540000  | -0.005682000 | 3.540821000  |
| C | 0.699794000  | 0.925099000  | 1.127285000  |
| C | 1.407929000  | 0.697295000  | 2.390468000  |
| C | 1.094372000  | -1.592176000 | -0.150601000 |
| C | 1.427566000  | -2.947511000 | 0.022130000  |
| C | 1.544924000  | 0.889629000  | -0.158863000 |
| C | 1.994441000  | -0.580191000 | -0.395717000 |
| C | 2.915676000  | 0.610412000  | 2.288069000  |
| C | 2.726682000  | -3.329083000 | -0.089625000 |
| C | 3.503112000  | 1.648215000  | 1.314776000  |
| C | 2.676528000  | 1.926453000  | 0.025509000  |
| C | 1.109314000  | 3.654270000  | -1.077252000 |
| C | 2.211151000  | 3.406857000  | -0.048263000 |
| C | 3.423358000  | 4.279580000  | -0.385285000 |
| O | 0.895252000  | 1.991520000  | 2.060793000  |
| H | 1.105593000  | 0.398566000  | 4.490577000  |
| H | 0.990459000  | -1.070328000 | 3.513480000  |
| H | -0.342656000 | 0.650047000  | 1.069291000  |
| H | -0.334670000 | 0.109449000  | 3.492402000  |
| H | 0.639083000  | -3.643351000 | 0.276611000  |
| H | 0.930339000  | 1.182471000  | -1.012741000 |
| H | 3.352529000  | 0.758367000  | 3.279401000  |
| H | 3.609614000  | 2.589937000  | 1.856424000  |
| H | 3.175084000  | -0.408701000 | 1.985722000  |
| H | 1.393813000  | 3.263935000  | -2.059614000 |
| H | 0.162886000  | 3.193200000  | -0.788087000 |
| H | 3.342683000  | 1.846634000  | -0.821262000 |
| H | 4.512542000  | 1.328552000  | 1.046691000  |
| H | 3.771336000  | 4.070377000  | -1.401494000 |
| H | 0.933757000  | 4.726499000  | -1.185204000 |
| H | 1.836686000  | 3.705400000  | 0.929688000  |
| H | 4.256458000  | 4.099242000  | 0.297158000  |
| H | 3.166835000  | 5.339161000  | -0.329555000 |
| O | -0.268936000 | -1.330748000 | 0.036534000  |
| C | -0.984095000 | -0.917122000 | -1.022648000 |
| O | -0.548910000 | -0.758324000 | -2.127398000 |
| C | -2.406220000 | -0.657467000 | -0.646034000 |
| C | -2.866452000 | -0.858215000 | 0.649382000  |
| C | -3.261710000 | -0.188266000 | -1.635028000 |
| C | -4.191945000 | -0.578530000 | 0.926578000  |
| H | -2.213333000 | -1.225276000 | 1.427899000  |
| C | -4.575864000 | 0.072129000  | -1.300219000 |
| H | -2.901673000 | -0.030485000 | -2.642019000 |
| C | -5.076185000 | -0.111316000 | -0.025135000 |
| H | -6.107243000 | 0.101430000  | 0.215005000  |
| N | -4.685556000 | -0.783048000 | 2.300060000  |
| O | -5.852292000 | -0.538840000 | 2.518200000  |
| O | -3.893178000 | -1.181344000 | 3.125995000  |
| N | -5.488839000 | 0.572528000  | -2.343388000 |
| O | -6.637210000 | 0.791973000  | -2.024057000 |
| O | -5.034114000 | 0.733533000  | -3.454826000 |

|   |             |              |              |
|---|-------------|--------------|--------------|
| C | 3.316753000 | -1.033696000 | -0.773287000 |
| C | 3.689729000 | -2.391323000 | -0.531054000 |
| C | 5.010571000 | -2.832450000 | -0.798296000 |
| C | 5.928448000 | -2.005978000 | -1.378520000 |
| C | 5.529281000 | -0.710246000 | -1.761210000 |
| C | 4.274900000 | -0.244735000 | -1.471295000 |
| H | 5.262471000 | -3.859089000 | -0.559222000 |
| H | 6.931371000 | -2.353961000 | -1.589387000 |
| H | 6.212267000 | -0.078432000 | -2.315005000 |
| H | 3.999562000 | 0.715526000  | -1.869045000 |
| H | 3.026470000 | -4.353402000 | 0.093538000  |

**SCF Done: E(RM062X) = -1680.23412635**

**# of imaginary frequencies = 1 (-43.3138)**

### TS2'-3c

|   |              |              |              |
|---|--------------|--------------|--------------|
| C | 0.154171000  | -0.517413000 | 3.171096000  |
| C | 0.651029000  | 0.847598000  | 1.010226000  |
| C | 1.077637000  | 0.277076000  | 2.294901000  |
| C | 1.070286000  | -1.369289000 | -0.776550000 |
| C | 1.256739000  | -2.751888000 | -0.976285000 |
| C | 1.718135000  | 0.972200000  | -0.090915000 |
| C | 2.082057000  | -0.450459000 | -0.608840000 |
| C | 2.562314000  | 0.001605000  | 2.414159000  |
| C | 2.518496000  | -3.250302000 | -0.996520000 |
| C | 3.423419000  | 1.129449000  | 1.817024000  |
| C | 2.881475000  | 1.790507000  | 0.516593000  |
| C | 1.699940000  | 3.906859000  | -0.370339000 |
| C | 2.579303000  | 3.301104000  | 0.721933000  |
| C | 3.909939000  | 4.056730000  | 0.779286000  |
| O | 0.772907000  | 1.668118000  | 2.175826000  |
| H | 0.352354000  | -0.288279000 | 4.220754000  |
| H | 0.311872000  | -1.585407000 | 3.014894000  |
| H | -0.383322000 | 0.767938000  | 0.709731000  |
| H | -0.887588000 | -0.284173000 | 2.947442000  |
| H | 0.391677000  | -3.391820000 | -1.076704000 |
| H | 1.297134000  | 1.521794000  | -0.935363000 |
| H | 2.820286000  | -0.130168000 | 3.468371000  |
| H | 3.526260000  | 1.909072000  | 2.574266000  |
| H | 2.767372000  | -0.954775000 | 1.923689000  |
| H | 2.113571000  | 3.707699000  | -1.364103000 |
| H | 0.679871000  | 3.518740000  | -0.341241000 |
| H | 3.685132000  | 1.810334000  | -0.203314000 |
| H | 4.426094000  | 0.733065000  | 1.641691000  |
| H | 4.406952000  | 4.027431000  | -0.195237000 |
| H | 1.644032000  | 4.990244000  | -0.246289000 |
| H | 2.072860000  | 3.431488000  | 1.676746000  |
| H | 4.590755000  | 3.623358000  | 1.515009000  |
| H | 3.751427000  | 5.103828000  | 1.044171000  |
| O | -0.248092000 | -0.904271000 | -0.832885000 |
| C | -1.178095000 | -1.443451000 | -0.026746000 |
| O | -0.971990000 | -2.296275000 | 0.788557000  |
| C | -2.515657000 | -0.816317000 | -0.246160000 |
| C | -2.706538000 | 0.192501000  | -1.182367000 |
| C | -3.571643000 | -1.260319000 | 0.540230000  |
| C | -3.970882000 | 0.737339000  | -1.311103000 |
| H | -1.893727000 | 0.550553000  | -1.797567000 |
| C | -4.812516000 | -0.680381000 | 0.365738000  |
| H | -3.419865000 | -2.041869000 | 1.271556000  |
| C | -5.048646000 | 0.324213000  | -0.553386000 |
| H | -6.027013000 | 0.765593000  | -0.671694000 |

|   |              |              |              |
|---|--------------|--------------|--------------|
| N | -4.180784000 | 1.811812000  | -2.297836000 |
| O | -5.297516000 | 2.272054000  | -2.396055000 |
| O | -3.223032000 | 2.168394000  | -2.949003000 |
| N | -5.937607000 | -1.147611000 | 1.195255000  |
| O | -7.017777000 | -0.627411000 | 1.018160000  |
| O | -5.711980000 | -2.022575000 | 2.002463000  |
| C | 3.411186000  | -0.954091000 | -0.898161000 |
| C | 3.621378000  | -2.363548000 | -0.986863000 |
| C | 4.926375000  | -2.889625000 | -1.158725000 |
| C | 6.001455000  | -2.069007000 | -1.341882000 |
| C | 5.785992000  | -0.679665000 | -1.417932000 |
| C | 4.542148000  | -0.146007000 | -1.208800000 |
| H | 5.042765000  | -3.967051000 | -1.175226000 |
| H | 6.993644000  | -2.478056000 | -1.481905000 |
| H | 6.606955000  | -0.020482000 | -1.670683000 |
| H | 4.427365000  | 0.909487000  | -1.375750000 |
| H | 2.694748000  | -4.314740000 | -1.089366000 |

**SCF Done: E(RM062X) = -1680.23348118**

**# of imaginary frequencies = 1 (-40.5406)**

**Cartesian coordinates of updated calculated minima and located transition states in DMSO or THF at the IEFPCM/M06-2X-D3/6-311+G(2d,p) level of theory.**

**(M)-1a**

|   |              |              |              |
|---|--------------|--------------|--------------|
| C | -3.821235000 | -2.247097000 | -1.595992000 |
| C | -1.673389000 | -1.095357000 | -1.127449000 |
| C | -2.996753000 | -1.136281000 | -1.012913000 |
| C | -0.783237000 | -0.019793000 | -0.537943000 |
| C | 0.496707000  | -0.609537000 | 0.034834000  |
| C | -3.751517000 | -0.074371000 | -0.255510000 |
| C | 2.823052000  | -1.781698000 | 1.158641000  |
| C | 0.428280000  | -1.593931000 | 0.999375000  |
| C | 1.585661000  | -2.183991000 | 1.557131000  |
| O | -0.797107000 | -2.009859000 | 1.431215000  |
| C | -2.922121000 | 1.189781000  | -0.060216000 |
| C | -1.531993000 | 0.860442000  | 0.486554000  |
| C | -1.178338000 | 2.663834000  | 2.229715000  |
| C | -0.720922000 | 2.112209000  | 0.879058000  |
| C | -0.764150000 | 3.219671000  | -0.176328000 |
| H | -4.540571000 | -1.857945000 | -2.322081000 |
| H | -4.401756000 | -2.742287000 | -0.811572000 |
| H | -0.506566000 | 0.626392000  | -1.373303000 |
| H | -4.678354000 | 0.158338000  | -0.789329000 |
| H | -2.818547000 | 1.695500000  | -1.025925000 |
| H | -4.057781000 | -0.483244000 | 0.715808000  |
| H | -2.225447000 | 2.975411000  | 2.193536000  |
| H | -1.075907000 | 1.913014000  | 3.015792000  |
| H | -1.665121000 | 0.256992000  | 1.390433000  |
| H | -3.442291000 | 1.881125000  | 0.607564000  |
| H | -1.752449000 | 3.684689000  | -0.211948000 |
| H | -0.585252000 | 3.535831000  | 2.513367000  |
| H | 0.322282000  | 1.798418000  | 0.993267000  |
| H | -0.535173000 | 2.852196000  | -1.178942000 |
| H | -0.039371000 | 3.999570000  | 0.064905000  |
| H | -3.199415000 | -2.994648000 | -2.088671000 |
| H | -0.687242000 | -2.697881000 | 2.096393000  |
| C | 1.796970000  | -0.171619000 | -0.378492000 |
| C | 2.963640000  | -0.763786000 | 0.187099000  |
| C | 4.251301000  | -0.330473000 | -0.214299000 |
| C | 4.404990000  | 0.662691000  | -1.139381000 |
| C | 3.258827000  | 1.263653000  | -1.701320000 |
| C | 2.002196000  | 0.861649000  | -1.336423000 |
| H | 5.116062000  | -0.805417000 | 0.235454000  |
| H | 5.392328000  | 0.989912000  | -1.438871000 |
| H | 3.372914000  | 2.055087000  | -2.431783000 |
| H | 1.158375000  | 1.356420000  | -1.793454000 |
| H | 3.711577000  | -2.232200000 | 1.584852000  |
| H | 1.470067000  | -2.960071000 | 2.306183000  |
| H | -1.163316000 | -1.882314000 | -1.678238000 |

**SCF Done: E(RM062X) = -851.697865060**

**# of imaginary frequencies = 0**

**(P)-1a**

|   |              |              |              |
|---|--------------|--------------|--------------|
| C | 2.213873000  | 3.428986000  | -1.551840000 |
| C | 1.111479000  | 1.215076000  | -1.328613000 |
| C | 2.040897000  | 2.076339000  | -0.924597000 |
| C | 0.869574000  | -0.149960000 | -0.717584000 |
| C | -0.610320000 | -0.491506000 | -0.642016000 |

|   |              |              |              |
|---|--------------|--------------|--------------|
| C | 2.963806000  | 1.749634000  | 0.221538000  |
| C | -3.336974000 | -1.259975000 | -0.562265000 |
| C | -1.056209000 | -1.663071000 | -1.214046000 |
| C | -2.416734000 | -2.048373000 | -1.181945000 |
| O | -0.148659000 | -2.485448000 | -1.822115000 |
| C | 3.005102000  | 0.254382000  | 0.518071000  |
| C | 1.594559000  | -0.326548000 | 0.635873000  |
| C | 1.849848000  | -1.876368000 | 2.623361000  |
| C | 1.574427000  | -1.789883000 | 1.121762000  |
| C | 2.539959000  | -2.696571000 | 0.356651000  |
| H | 3.215793000  | 3.534066000  | -1.977169000 |
| H | 2.107897000  | 4.214575000  | -0.797367000 |
| H | 1.480721000  | 3.604931000  | -2.338935000 |
| H | 1.308330000  | -0.875131000 | -1.408002000 |
| H | 3.967573000  | 2.119280000  | -0.009794000 |
| H | 3.533004000  | -0.250985000 | -0.297013000 |
| H | 2.637740000  | 2.306288000  | 1.110126000  |
| H | 2.852395000  | -1.513809000 | 2.864149000  |
| H | 1.129797000  | -1.283295000 | 3.191109000  |
| H | 1.054828000  | 0.263365000  | 1.386097000  |
| H | 3.574622000  | 0.068952000  | 1.431796000  |
| H | 3.578353000  | -2.442208000 | 0.583280000  |
| H | 1.783820000  | -2.910320000 | 2.968371000  |
| H | 0.559818000  | -2.167077000 | 0.954963000  |
| H | 2.396365000  | -2.629255000 | -0.723063000 |
| H | 2.385239000  | -3.737714000 | 0.647202000  |
| H | -0.601636000 | -3.255716000 | -2.181236000 |
| H | -2.712698000 | -2.978882000 | -1.654121000 |
| H | -4.380158000 | -1.551789000 | -0.533669000 |
| C | -1.572432000 | 0.337659000  | 0.018817000  |
| C | -2.941709000 | -0.050603000 | 0.057408000  |
| C | -3.894981000 | 0.766564000  | 0.713751000  |
| C | -3.522978000 | 1.931910000  | 1.322293000  |
| C | -2.167859000 | 2.325380000  | 1.293435000  |
| C | -1.224863000 | 1.557885000  | 0.664258000  |
| H | -4.930000000 | 0.443637000  | 0.723487000  |
| H | -4.256998000 | 2.550271000  | 1.822973000  |
| H | -1.869116000 | 3.248590000  | 1.774759000  |
| H | -0.198887000 | 1.893808000  | 0.650739000  |
| H | 0.461677000  | 1.486256000  | -2.157634000 |

**SCF Done: E(RM062X) = -851.700609108**

**# of imaginary frequencies = 0**

### TS1-1a

|   |              |              |              |
|---|--------------|--------------|--------------|
| C | -1.253750000 | 3.478261000  | -0.846386000 |
| C | -0.784968000 | 1.444055000  | 0.487261000  |
| C | -1.194094000 | 1.989992000  | -0.655300000 |
| C | -0.747173000 | -0.056463000 | 0.741537000  |
| C | 0.604850000  | -0.726115000 | 0.373869000  |
| C | -1.707732000 | 1.168580000  | -1.807904000 |
| C | 2.971185000  | -1.897489000 | -0.725999000 |
| C | 0.689580000  | -2.066823000 | 0.041483000  |
| C | 1.850625000  | -2.638603000 | -0.535518000 |
| C | -1.741960000 | -0.338192000 | -1.526768000 |
| C | -1.971432000 | -0.628107000 | -0.037863000 |
| C | -3.447625000 | -0.151617000 | 1.991767000  |
| C | -3.327191000 | -0.082484000 | 0.468781000  |
| C | -4.478017000 | -0.867856000 | -0.165820000 |
| H | -0.895731000 | 4.012017000  | 0.034063000  |
| H | -2.278337000 | 3.799184000  | -1.057040000 |



|   |              |              |              |
|---|--------------|--------------|--------------|
| H | -0.540838000 | 2.114909000  | 1.301852000  |
| H | -0.645451000 | 3.779657000  | -1.703828000 |
| H | -0.902927000 | -0.226803000 | 1.810606000  |
| H | -2.717622000 | 1.534689000  | -2.032612000 |
| H | -2.509731000 | -0.810924000 | -2.140583000 |
| H | -1.117862000 | 1.380953000  | -2.705155000 |
| H | -3.212290000 | -1.157902000 | 2.352564000  |
| H | -2.778648000 | 0.552671000  | 2.488703000  |
| H | -2.021219000 | -1.701704000 | 0.102972000  |
| H | -0.792915000 | -0.789046000 | -1.825056000 |
| H | -4.417257000 | -1.925275000 | 0.108361000  |
| H | -4.466437000 | 0.086351000  | 2.304096000  |
| H | -3.434443000 | 0.964936000  | 0.175005000  |
| H | -4.473374000 | -0.800791000 | -1.254377000 |
| H | -5.439573000 | -0.487114000 | 0.184153000  |
| H | 1.816649000  | -3.678814000 | -0.842192000 |
| O | -0.368257000 | -2.905582000 | 0.252513000  |
| H | 3.846724000  | -2.324213000 | -1.200303000 |
| H | -0.145264000 | -3.786902000 | -0.065648000 |
| C | 1.855944000  | -0.006409000 | 0.363979000  |
| C | 3.016711000  | -0.570880000 | -0.240713000 |
| C | 4.227742000  | 0.161600000  | -0.305882000 |
| C | 4.341718000  | 1.392029000  | 0.275233000  |
| C | 3.238634000  | 1.913565000  | 0.980876000  |
| C | 2.045769000  | 1.242331000  | 1.020725000  |
| H | 5.073916000  | -0.294532000 | -0.807443000 |
| H | 5.273007000  | 1.941909000  | 0.230987000  |
| H | 3.337383000  | 2.850541000  | 1.515193000  |
| H | 1.255401000  | 1.654617000  | 1.621437000  |

**SCF Done: E(RM062X) = -851.675039999**

**# of imaginary frequencies = 1 (-50.223)**

### TS2-1a

|   |              |              |              |
|---|--------------|--------------|--------------|
| C | 3.057469000  | 2.559607000  | 1.437725000  |
| C | 1.638483000  | 1.418348000  | -0.242024000 |
| C | 2.203786000  | 1.417733000  | 0.963338000  |
| C | 0.787345000  | 0.273916000  | -0.794060000 |
| C | -0.725835000 | 0.581450000  | -0.606341000 |
| C | 2.103174000  | 0.251953000  | 1.910218000  |
| C | -3.306228000 | 1.514039000  | 0.185222000  |
| C | -1.150934000 | 1.882258000  | -0.816127000 |
| C | -2.416376000 | 2.356746000  | -0.399065000 |
| O | -0.321805000 | 2.760546000  | -1.450110000 |
| C | 1.197203000  | -0.862082000 | 1.389583000  |
| C | 1.340889000  | -1.014900000 | -0.130507000 |
| C | 2.911705000  | -1.461686000 | -2.087191000 |
| C | 2.791119000  | -1.336858000 | -0.566742000 |
| C | 3.265801000  | -2.636798000 | 0.087808000  |
| H | 4.069852000  | 2.213249000  | 1.667021000  |
| H | 2.653798000  | 2.985905000  | 2.360501000  |
| H | 1.806455000  | 2.270489000  | -0.884624000 |
| H | 3.122432000  | 3.350928000  | 0.690986000  |
| H | 0.962937000  | 0.222926000  | -1.872157000 |
| H | 3.121044000  | -0.127927000 | 2.070443000  |
| H | 1.417015000  | -1.800300000 | 1.900588000  |
| H | 1.764155000  | 0.600170000  | 2.890817000  |
| H | 2.162271000  | -2.157356000 | -2.478045000 |
| H | 2.783298000  | -0.505034000 | -2.594238000 |
| H | 0.779635000  | -1.887593000 | -0.441933000 |
| H | 0.156581000  | -0.623233000 | 1.619821000  |

|   |              |              |              |
|---|--------------|--------------|--------------|
| H | 2.590712000  | -3.462261000 | -0.158943000 |
| H | 3.896818000  | -1.845160000 | -2.359714000 |
| H | 3.457735000  | -0.534080000 | -0.243340000 |
| H | 3.318394000  | -2.557053000 | 1.174140000  |
| H | 4.261652000  | -2.901967000 | -0.271914000 |
| H | -2.647760000 | 3.408576000  | -0.528585000 |
| H | -0.721881000 | 3.636650000  | -1.457911000 |
| H | -4.258403000 | 1.876842000  | 0.553001000  |
| C | -1.757824000 | -0.350994000 | -0.221266000 |
| C | -3.016547000 | 0.132283000  | 0.250971000  |
| C | -4.005131000 | -0.765609000 | 0.724628000  |
| C | -3.823025000 | -2.117355000 | 0.665011000  |
| C | -2.645744000 | -2.613425000 | 0.070590000  |
| C | -1.658372000 | -1.766060000 | -0.356364000 |
| H | -4.928205000 | -0.348195000 | 1.111125000  |
| H | -4.586847000 | -2.796949000 | 1.020142000  |
| H | -2.526628000 | -3.679826000 | -0.076971000 |
| H | -0.826376000 | -2.198560000 | -0.881771000 |

**SCF Done: E(RM062X) = -851.672791349**

**# of imaginary frequencies = 1 (-50.857)**

**(M)-1b**

|   |              |              |              |
|---|--------------|--------------|--------------|
| C | -3.826146000 | -1.446749000 | -2.197958000 |
| C | -1.633939000 | -0.558391000 | -1.445025000 |
| C | -2.960691000 | -0.539851000 | -1.371711000 |
| C | -0.705366000 | 0.310309000  | -0.619796000 |
| C | 0.527995000  | -0.458860000 | -0.168017000 |
| C | -3.680051000 | 0.380707000  | -0.419650000 |
| C | 2.760655000  | -1.963883000 | 0.698753000  |
| C | 0.379938000  | -1.630168000 | 0.560021000  |
| C | 1.495884000  | -2.386052000 | 0.988986000  |
| O | -0.889711000 | -2.018449000 | 0.850181000  |
| C | -2.788083000 | 1.519954000  | 0.060542000  |
| C | -1.438323000 | 0.996137000  | 0.554226000  |
| C | -1.041917000 | 2.354337000  | 2.654792000  |
| C | -0.573749000 | 2.083355000  | 1.224713000  |
| C | -0.525802000 | 3.394002000  | 0.435997000  |
| H | -4.496494000 | -0.867657000 | -2.839408000 |
| H | -4.461254000 | -2.060276000 | -1.551440000 |
| H | -0.371529000 | 1.103125000  | -1.291899000 |
| H | -4.573799000 | 0.779331000  | -0.910114000 |
| H | -2.623234000 | 2.212246000  | -0.771750000 |
| H | -4.041762000 | -0.205861000 | 0.434662000  |
| H | -2.070462000 | 2.724225000  | 2.669058000  |
| H | -1.000626000 | 1.446503000  | 3.260035000  |
| H | -1.636248000 | 0.223492000  | 1.303831000  |
| H | -3.291543000 | 2.084371000  | 0.849539000  |
| H | -1.485464000 | 3.914331000  | 0.487334000  |
| H | -0.413916000 | 3.109640000  | 3.132059000  |
| H | 0.447218000  | 1.691572000  | 1.286470000  |
| H | -0.289767000 | 3.239649000  | -0.619062000 |
| H | 0.234030000  | 4.058114000  | 0.852424000  |
| H | -3.230867000 | -2.109867000 | -2.825841000 |
| C | 1.852752000  | -0.009314000 | -0.458518000 |
| C | 2.976261000  | -0.771577000 | -0.022277000 |
| C | 4.294457000  | -0.329960000 | -0.303610000 |
| C | 4.518527000  | 0.830299000  | -0.986085000 |
| C | 3.415427000  | 1.600202000  | -1.417535000 |
| C | 2.133170000  | 1.197268000  | -1.165342000 |
| H | 5.123358000  | -0.937492000 | 0.042138000  |

|   |              |              |              |
|---|--------------|--------------|--------------|
| H | 5.527350000  | 1.162549000  | -1.194711000 |
| H | 3.586154000  | 2.524555000  | -1.955544000 |
| H | 1.327118000  | 1.825042000  | -1.513963000 |
| H | 3.615890000  | -2.542469000 | 1.027994000  |
| H | 1.354050000  | -3.298588000 | 1.549176000  |
| H | -1.150043000 | -1.240405000 | -2.140556000 |
| C | -1.091318000 | -3.242774000 | 1.531395000  |
| H | -0.677567000 | -4.082520000 | 0.968769000  |
| H | -0.652413000 | -3.218789000 | 2.531398000  |
| H | -2.168570000 | -3.361158000 | 1.614547000  |

**SCF Done: E(RM062X) = -890.984572209**

**# of imaginary frequencies = 0**

**(P)-1b**

|   |              |              |              |
|---|--------------|--------------|--------------|
| C | -2.503329000 | -3.132232000 | -2.038034000 |
| C | -1.215607000 | -1.095150000 | -1.438842000 |
| C | -2.230213000 | -1.920160000 | -1.195777000 |
| C | -0.874719000 | 0.127384000  | -0.612037000 |
| C | 0.626150000  | 0.326143000  | -0.460241000 |
| C | -3.153991000 | -1.699637000 | -0.025103000 |
| C | 3.396471000  | 0.826218000  | -0.212807000 |
| C | 1.177516000  | 1.550012000  | -0.802955000 |
| C | 2.565265000  | 1.799574000  | -0.686360000 |
| O | 0.321410000  | 2.511182000  | -1.251658000 |
| C | -3.071237000 | -0.275028000 | 0.512671000  |
| C | -1.618986000 | 0.148412000  | 0.742421000  |
| C | -1.794813000 | 1.374754000  | 2.952494000  |
| C | -1.486111000 | 1.506693000  | 1.460725000  |
| C | -2.347505000 | 2.608409000  | 0.840822000  |
| H | -3.498261000 | -3.076037000 | -2.488364000 |
| H | -2.487434000 | -4.035986000 | -1.421046000 |
| H | -1.766602000 | -3.244452000 | -2.833437000 |
| H | -1.234130000 | 0.987181000  | -1.182000000 |
| H | -4.179471000 | -1.932471000 | -0.328295000 |
| H | -3.529776000 | 0.402434000  | -0.214834000 |
| H | -2.904737000 | -2.420815000 | 0.764578000  |
| H | -2.830978000 | 1.068988000  | 3.117689000  |
| H | -1.144273000 | 0.636405000  | 3.425967000  |
| H | -1.153310000 | -0.601333000 | 1.393227000  |
| H | -3.647429000 | -0.189500000 | 1.437018000  |
| H | -3.409868000 | 2.419146000  | 1.014027000  |
| H | -1.650055000 | 2.329749000  | 3.461970000  |
| H | -0.438665000 | 1.813396000  | 1.371626000  |
| H | -2.184255000 | 2.698836000  | -0.234422000 |
| H | -2.106571000 | 3.571839000  | 1.295255000  |
| H | 2.974284000  | 2.758223000  | -0.969821000 |
| H | 4.459715000  | 1.016280000  | -0.123212000 |
| C | 1.493500000  | -0.685967000 | 0.050689000  |
| C | 2.889874000  | -0.432782000 | 0.172745000  |
| C | 3.754611000  | -1.434875000 | 0.682737000  |
| C | 3.269782000  | -2.649855000 | 1.072363000  |
| C | 1.884780000  | -2.909905000 | 0.964781000  |
| C | 1.026863000  | -1.965693000 | 0.472010000  |
| H | 4.812785000  | -1.210715000 | 0.758791000  |
| H | 3.935195000  | -3.409465000 | 1.462372000  |
| H | 1.496652000  | -3.871885000 | 1.276640000  |
| H | -0.023865000 | -2.201152000 | 0.394991000  |
| H | -0.567618000 | -1.288648000 | -2.290821000 |
| C | 0.828011000  | 3.808087000  | -1.508588000 |
| H | 1.547124000  | 3.799252000  | -2.330480000 |

H -0.031413000 4.411279000 -1.789527000  
H 1.293802000 4.233584000 -0.616914000  
**SCF Done: E(RM062X) = -890.987319393**  
**# of imaginary frequencies = 0**

**TS1-1b**

C -0.982898000 -3.674319000 1.027474000  
C -0.644767000 -1.702817000 -0.433637000  
C -1.017981000 -2.200224000 0.742912000  
C -0.698957000 -0.221121000 -0.779876000  
C 0.615025000 0.540207000 -0.453001000  
C -1.580494000 -1.342788000 1.845579000  
C 2.887612000 1.868699000 0.644891000  
C 0.621413000 1.898469000 -0.175884000  
C 1.736443000 2.551232000 0.405321000  
C -1.709258000 0.139242000 1.473515000  
C -1.956241000 0.320817000 -0.029610000  
C -3.401167000 -0.375201000 -2.017894000  
C -3.276770000 -0.337485000 -0.494213000  
C -4.471898000 0.418670000 0.092186000  
H -0.593011000 -4.238668000 0.180288000  
H -1.984673000 -4.045650000 1.263485000  
H -0.356296000 -2.406958000 -1.204319000  
H -0.355213000 -3.882012000 1.898666000  
H -0.867236000 -0.125148000 -1.856071000  
H -2.565367000 -1.756085000 2.097666000  
H -2.505548000 0.599405000 2.060236000  
H -0.977306000 -1.462620000 2.751038000  
H -3.225512000 0.617565000 -2.444225000  
H -2.691771000 -1.069739000 -2.470477000  
H -2.073910000 1.377723000 -0.241142000  
H -0.790097000 0.664998000 1.741825000  
H -4.474033000 1.457352000 -0.252104000  
H -4.404201000 -0.692586000 -2.309945000  
H -3.321715000 -1.367751000 -0.131875000  
H -4.462758000 0.424759000 1.182783000  
H -5.409447000 -0.040439000 -0.227493000  
H 1.660733000 3.598226000 0.664384000  
O -0.472715000 2.645463000 -0.500534000  
H 3.732144000 2.355245000 1.118359000  
C 1.898228000 -0.113560000 -0.402200000  
C 3.014165000 0.532707000 0.204607000  
C 4.260389000 -0.134135000 0.316065000  
C 4.447917000 -1.374862000 -0.221241000  
C 3.387168000 -1.978662000 -0.928157000  
C 2.162547000 -1.373256000 -1.011393000  
H 5.072411000 0.381023000 0.816910000  
H 5.405587000 -1.873304000 -0.142727000  
H 3.546241000 -2.926058000 -1.428399000  
H 1.404780000 -1.843789000 -1.612395000  
C -0.821460000 3.734111000 0.343565000  
H -0.219788000 4.617913000 0.125411000  
H -1.866247000 3.956674000 0.134979000  
H -0.710140000 3.461875000 1.395373000

**SCF Done: E(RM062X) = -890.960990352**  
**# of imaginary frequencies = 1 (-47.2872)**

**TS2-1b**

C 2.947726000 2.280479000 1.724641000  
C 1.609029000 1.244809000 -0.083460000

|   |              |              |              |
|---|--------------|--------------|--------------|
| C | 2.142402000  | 1.158317000  | 1.133378000  |
| C | 0.797718000  | 0.130578000  | -0.746331000 |
| C | -0.724734000 | 0.386436000  | -0.547763000 |
| C | 2.056170000  | -0.088236000 | 1.973033000  |
| C | -3.309880000 | 1.222837000  | 0.312286000  |
| C | -1.165440000 | 1.696113000  | -0.660064000 |
| C | -2.434225000 | 2.124180000  | -0.207168000 |
| O | -0.342207000 | 2.600275000  | -1.265616000 |
| C | 1.205271000  | -1.185144000 | 1.333758000  |
| C | 1.380893000  | -1.194975000 | -0.190990000 |
| C | 3.005282000  | -1.398947000 | -2.144642000 |
| C | 2.849843000  | -1.427511000 | -0.622620000 |
| C | 3.354623000  | -2.769322000 | -0.085972000 |
| H | 3.964731000  | 1.947299000  | 1.952744000  |
| H | 2.506771000  | 2.615655000  | 2.667815000  |
| H | 1.783307000  | 2.146348000  | -0.653670000 |
| H | 3.004979000  | 3.133554000  | 1.048088000  |
| H | 0.985460000  | 0.179482000  | -1.821778000 |
| H | 3.082963000  | -0.445040000 | 2.129173000  |
| H | 1.453614000  | -2.156044000 | 1.764305000  |
| H | 1.679737000  | 0.160854000  | 2.969994000  |
| H | 2.288675000  | -2.077369000 | -2.618502000 |
| H | 2.853152000  | -0.401941000 | -2.559024000 |
| H | 0.856229000  | -2.052280000 | -0.597029000 |
| H | 0.152848000  | -1.008206000 | 1.564088000  |
| H | 2.713857000  | -3.587907000 | -0.428482000 |
| H | 4.008518000  | -1.721216000 | -2.429944000 |
| H | 3.482157000  | -0.639161000 | -0.207353000 |
| H | 3.381176000  | -2.794688000 | 1.003926000  |
| H | 4.366489000  | -2.965941000 | -0.445053000 |
| H | -2.694049000 | 3.172308000  | -0.265288000 |
| H | -4.269575000 | 1.541334000  | 0.701547000  |
| C | -1.737449000 | -0.589092000 | -0.227674000 |
| C | -3.001930000 | -0.155175000 | 0.276538000  |
| C | -3.977718000 | -1.098321000 | 0.687324000  |
| C | -3.773568000 | -2.439700000 | 0.541009000  |
| C | -2.584111000 | -2.879956000 | -0.074270000 |
| C | -1.610182000 | -1.991896000 | -0.443683000 |
| H | -4.908048000 | -0.721919000 | 1.097742000  |
| H | -4.527710000 | -3.152725000 | 0.848266000  |
| H | -2.445009000 | -3.933839000 | -0.281765000 |
| H | -0.763782000 | -2.378686000 | -0.981231000 |
| C | -0.278516000 | 3.908044000  | -0.712664000 |
| H | 0.629930000  | 4.361584000  | -1.104490000 |
| H | -1.134211000 | 4.513936000  | -1.014422000 |
| H | -0.221788000 | 3.861301000  | 0.377265000  |

**SCF Done: E(RM062X) = -890.959611538**

**# of imaginary frequencies = 1 (-49.8429)**

**(M)-1c**

|   |              |             |              |
|---|--------------|-------------|--------------|
| C | -0.572629000 | 0.048216000 | 1.726623000  |
| C | -1.791895000 | 0.552750000 | 0.979260000  |
| C | -1.482537000 | 1.857760000 | 0.211286000  |
| C | -0.722476000 | 2.802056000 | 1.145071000  |
| C | 0.622790000  | 2.214498000 | 1.555237000  |
| C | 0.517002000  | 0.771438000 | 1.975158000  |
| H | -2.536765000 | 0.794388000 | 1.739862000  |
| H | -0.812520000 | 1.592062000 | -0.615106000 |
| H | -0.575258000 | 3.774386000 | 0.669842000  |
| H | -1.323460000 | 2.973574000 | 2.043669000  |

|   |              |              |              |
|---|--------------|--------------|--------------|
| H | 1.342624000  | 2.300411000  | 0.730890000  |
| H | 1.054280000  | 2.790760000  | 2.379745000  |
| H | -0.613904000 | -0.983433000 | 2.068589000  |
| C | -2.739673000 | 2.501282000  | -0.407434000 |
| H | -3.352240000 | 1.692606000  | -0.819551000 |
| C | -2.365207000 | 3.421492000  | -1.569690000 |
| H | -1.832559000 | 2.873101000  | -2.349220000 |
| H | -1.724147000 | 4.240435000  | -1.233672000 |
| H | -3.258466000 | 3.863691000  | -2.015321000 |
| C | -3.590766000 | 3.264749000  | 0.609689000  |
| H | -4.549523000 | 3.540550000  | 0.167021000  |
| H | -3.091404000 | 4.185417000  | 0.920975000  |
| H | -3.795929000 | 2.680108000  | 1.508716000  |
| C | -3.384014000 | -2.530303000 | -1.669358000 |
| C | -2.384036000 | -0.523062000 | 0.078850000  |
| C | -1.604110000 | -1.175828000 | -0.839953000 |
| C | -2.071830000 | -2.172743000 | -1.714089000 |
| H | -3.771393000 | -3.294517000 | -2.332002000 |
| H | -1.375944000 | -2.632134000 | -2.404018000 |
| C | -4.262717000 | -1.900583000 | -0.754492000 |
| C | -3.771286000 | -0.893190000 | 0.124621000  |
| C | -4.704544000 | -0.289070000 | 1.009853000  |
| C | -6.022077000 | -0.659646000 | 1.020704000  |
| C | -6.497600000 | -1.660783000 | 0.148765000  |
| C | -5.631491000 | -2.265109000 | -0.717225000 |
| H | -4.386043000 | 0.480663000  | 1.696153000  |
| H | -6.706041000 | -0.178564000 | 1.708481000  |
| H | -7.541847000 | -1.945012000 | 0.169180000  |
| H | -5.976755000 | -3.036247000 | -1.396112000 |
| O | -0.261172000 | -0.800909000 | -0.970083000 |
| C | 0.659375000  | -1.622464000 | -0.441794000 |
| O | 0.429033000  | -2.702663000 | 0.022419000  |
| C | 1.710649000  | 0.206985000  | 2.690545000  |
| H | 2.622054000  | 0.384969000  | 2.108511000  |
| H | 1.855230000  | 0.704318000  | 3.653496000  |
| H | 1.611523000  | -0.865554000 | 2.862522000  |
| C | 2.022897000  | -1.015279000 | -0.482959000 |
| C | 3.084810000  | -1.768074000 | 0.000648000  |
| C | 2.223672000  | 0.284344000  | -0.928417000 |
| C | 4.342388000  | -1.195386000 | 0.024805000  |
| H | 2.924507000  | -2.775586000 | 0.358928000  |
| C | 3.501771000  | 0.809162000  | -0.872699000 |
| H | 1.403494000  | 0.881267000  | -1.300367000 |
| C | 4.587480000  | 0.095702000  | -0.402598000 |
| H | 5.576955000  | 0.526903000  | -0.366668000 |
| N | 5.474093000  | -1.986855000 | 0.541893000  |
| O | 6.565384000  | -1.460216000 | 0.553648000  |
| O | 5.239985000  | -3.112923000 | 0.921969000  |
| N | 3.714261000  | 2.198080000  | -1.318264000 |
| O | 2.735087000  | 2.834189000  | -1.645050000 |
| O | 4.850605000  | 2.617445000  | -1.323202000 |

**SCF Done: E(RM062X) = -1605.05920541**

**# of imaginary frequencies = 0**

**(P)-1c**

|   |              |             |              |
|---|--------------|-------------|--------------|
| C | -2.600060000 | 2.033571000 | -0.607118000 |
| C | -1.822224000 | 0.919761000 | 0.063797000  |
| C | -1.947290000 | 0.950552000 | 1.604701000  |
| C | -1.829715000 | 2.400488000 | 2.077470000  |
| C | -2.954377000 | 3.260709000 | 1.512192000  |

|   |              |              |              |
|---|--------------|--------------|--------------|
| C | -3.110197000 | 3.087670000  | 0.023124000  |
| H | -0.770141000 | 1.101728000  | -0.172108000 |
| H | -2.948892000 | 0.593589000  | 1.869891000  |
| H | -0.871201000 | 2.810016000  | 1.742696000  |
| H | -1.834043000 | 2.447100000  | 3.168776000  |
| H | -2.772541000 | 4.316784000  | 1.732878000  |
| H | -3.906636000 | 3.013066000  | 1.999335000  |
| H | -2.733595000 | 1.940235000  | -1.682247000 |
| C | -0.940254000 | 0.003042000  | 2.286354000  |
| H | -0.947392000 | -0.935652000 | 1.722923000  |
| C | 0.491912000  | 0.543115000  | 2.286354000  |
| H | 0.798977000  | 0.918242000  | 1.306445000  |
| H | 0.598270000  | 1.365932000  | 2.997400000  |
| H | 1.192711000  | -0.241928000 | 2.580250000  |
| C | -1.370576000 | -0.331995000 | 3.714473000  |
| H | -1.396603000 | 0.562884000  | 4.341075000  |
| H | -0.670202000 | -1.033815000 | 4.171661000  |
| H | -2.363203000 | -0.786328000 | 3.728852000  |
| C | -2.639090000 | -3.003807000 | -1.654588000 |
| C | -2.156082000 | -0.442417000 | -0.523937000 |
| C | -1.158754000 | -1.246296000 | -1.009540000 |
| C | -1.372175000 | -2.514584000 | -1.583718000 |
| H | -2.830163000 | -3.977322000 | -2.089360000 |
| H | -0.524038000 | -3.075452000 | -1.953703000 |
| C | -3.727159000 | -2.245089000 | -1.155233000 |
| C | -3.494322000 | -0.960108000 | -0.591020000 |
| C | -4.619484000 | -0.243200000 | -0.101487000 |
| C | -5.881186000 | -0.770135000 | -0.168867000 |
| C | -6.102928000 | -2.044078000 | -0.732164000 |
| C | -5.045099000 | -2.761360000 | -1.215010000 |
| H | -4.482428000 | 0.739469000  | 0.323549000  |
| H | -6.718987000 | -0.200744000 | 0.213799000  |
| H | -7.106440000 | -2.447308000 | -0.779661000 |
| H | -5.195190000 | -3.742189000 | -1.651205000 |
| O | 0.158859000  | -0.765125000 | -1.000656000 |
| C | 1.063058000  | -1.411264000 | -0.248451000 |
| O | 0.831070000  | -2.366918000 | 0.435950000  |
| C | -3.893879000 | 4.149816000  | -0.690766000 |
| H | -4.891755000 | 4.244457000  | -0.251984000 |
| H | -3.409305000 | 5.124244000  | -0.585200000 |
| H | -4.002111000 | 3.926872000  | -1.752019000 |
| C | 2.413617000  | -0.779208000 | -0.353489000 |
| C | 3.440379000  | -1.326880000 | 0.405033000  |
| C | 2.643105000  | 0.329883000  | -1.157925000 |
| C | 4.691111000  | -0.744637000 | 0.340138000  |
| H | 3.258062000  | -2.187743000 | 1.033378000  |
| C | 3.915439000  | 0.871377000  | -1.182032000 |
| H | 1.852608000  | 0.768168000  | -1.750038000 |
| C | 4.964554000  | 0.360022000  | -0.443857000 |
| H | 5.949517000  | 0.801506000  | -0.477323000 |
| N | 5.785295000  | -1.319677000 | 1.144276000  |
| O | 6.871913000  | -0.788586000 | 1.069966000  |
| O | 5.527531000  | -2.286034000 | 1.827689000  |
| N | 4.167014000  | 2.051324000  | -2.030004000 |
| O | 3.239932000  | 2.477139000  | -2.683597000 |
| O | 5.284272000  | 2.519896000  | -2.018672000 |

**SCF Done: E(RM062X) = -1605.05499687**

**# of imaginary frequencies = 0**

**TS1-1c**

|   |              |              |              |
|---|--------------|--------------|--------------|
| C | -4.157204000 | 3.788597000  | -0.013740000 |
| C | -2.855174000 | 1.824483000  | -0.772795000 |
| C | -3.103926000 | 2.733813000  | 0.166859000  |
| C | -1.767706000 | 0.761244000  | -0.668251000 |
| C | -2.266488000 | -0.588422000 | -0.089136000 |
| C | -2.301560000 | 2.832658000  | 1.435434000  |
| C | -3.255716000 | -2.844577000 | 1.377482000  |
| C | -1.459512000 | -1.461811000 | 0.604705000  |
| C | -1.928493000 | -2.558930000 | 1.354888000  |
| C | -1.183602000 | 1.792417000  | 1.531859000  |
| C | -0.625116000 | 1.440379000  | 0.146618000  |
| C | 0.341430000  | 2.336081000  | -2.038241000 |
| C | 0.007444000  | 2.650845000  | -0.579425000 |
| C | 1.285377000  | 3.080125000  | 0.146229000  |
| H | -4.679917000 | 3.678258000  | -0.963678000 |
| H | -3.711675000 | 4.786861000  | 0.026768000  |
| H | -3.410983000 | 1.903869000  | -1.697727000 |
| H | -4.892534000 | 3.737105000  | 0.793868000  |
| H | -1.404114000 | 0.540127000  | -1.675783000 |
| H | -1.881109000 | 3.845557000  | 1.469179000  |
| H | -0.392867000 | 2.154683000  | 2.189781000  |
| H | -2.967041000 | 2.766304000  | 2.301445000  |
| H | 0.913936000  | 1.404488000  | -2.111404000 |
| H | -0.552968000 | 2.231799000  | -2.653872000 |
| H | 0.207142000  | 0.765019000  | 0.297947000  |
| H | -1.568675000 | 0.879654000  | 1.992272000  |
| H | 2.026278000  | 2.273235000  | 0.122731000  |
| H | 0.947526000  | 3.134687000  | -2.469767000 |
| H | -0.689928000 | 3.491987000  | -0.567259000 |
| H | 1.104202000  | 3.342116000  | 1.189205000  |
| H | 1.728625000  | 3.949733000  | -0.341984000 |
| H | -1.205581000 | -3.136077000 | 1.916341000  |
| O | -0.070248000 | -1.313619000 | 0.697156000  |
| H | -3.642523000 | -3.657935000 | 1.978848000  |
| C | -3.633210000 | -1.034312000 | -0.239801000 |
| C | -4.133306000 | -2.114427000 | 0.542320000  |
| C | -5.492305000 | -2.504044000 | 0.437835000  |
| C | -6.326103000 | -1.916659000 | -0.469458000 |
| C | -5.809854000 | -0.933593000 | -1.337681000 |
| C | -4.514459000 | -0.506976000 | -1.222902000 |
| H | -5.845335000 | -3.305022000 | 1.077077000  |
| H | -7.359272000 | -2.228678000 | -0.552279000 |
| H | -6.438248000 | -0.521824000 | -2.117452000 |
| H | -4.145864000 | 0.197943000  | -1.946526000 |
| C | 0.646082000  | -1.355522000 | -0.437403000 |
| O | 0.201378000  | -1.573999000 | -1.527535000 |
| C | 2.086457000  | -1.045602000 | -0.182498000 |
| C | 2.943498000  | -1.020756000 | -1.275792000 |
| C | 2.553515000  | -0.734429000 | 1.088787000  |
| C | 4.266622000  | -0.682751000 | -1.068825000 |
| H | 2.575738000  | -1.253041000 | -2.265796000 |
| C | 3.888141000  | -0.404039000 | 1.235664000  |
| H | 1.895841000  | -0.738160000 | 1.946222000  |
| C | 4.774133000  | -0.366280000 | 0.176956000  |
| H | 5.811511000  | -0.099709000 | 0.315029000  |
| N | 4.388968000  | -0.063609000 | 2.580340000  |
| O | 3.596170000  | -0.096460000 | 3.495996000  |
| O | 5.560235000  | 0.228311000  | 2.683103000  |
| N | 5.180409000  | -0.646979000 | -2.225949000 |
| O | 6.334008000  | -0.340645000 | -2.017336000 |



O 4.718257000 -0.925329000 -3.310391000  
**SCF Done: E(RM062X) = -1605.03052027**  
**# of imaginary frequencies = 1 (-40.4416)**

**TS2-1c**

|   |              |              |              |
|---|--------------|--------------|--------------|
| C | 0.068658000  | 2.728514000  | 2.510040000  |
| C | 0.671061000  | 1.299490000  | 0.579296000  |
| C | 1.050555000  | 2.143841000  | 1.535574000  |
| C | 1.624673000  | 0.701057000  | -0.454791000 |
| C | 2.119489000  | -0.704895000 | -0.003644000 |
| C | 2.464011000  | 2.646430000  | 1.662182000  |
| C | 2.832631000  | -3.149965000 | 1.316660000  |
| C | 1.214292000  | -1.553253000 | 0.595691000  |
| C | 1.536962000  | -2.747014000 | 1.263562000  |
| O | -0.152669000 | -1.253505000 | 0.650087000  |
| C | 3.417587000  | 2.064793000  | 0.615124000  |
| C | 2.685908000  | 1.803675000  | -0.707821000 |
| C | 1.184242000  | 2.797215000  | -2.521354000 |
| C | 2.077173000  | 3.092771000  | -1.315337000 |
| C | 3.195102000  | 4.052113000  | -1.731156000 |
| H | 0.053617000  | 3.819502000  | 2.431604000  |
| H | 0.358129000  | 2.489031000  | 3.536826000  |
| H | -0.384149000 | 1.069927000  | 0.508763000  |
| H | -0.941150000 | 2.353727000  | 2.341149000  |
| H | 1.068799000  | 0.534151000  | -1.381014000 |
| H | 2.422966000  | 3.739417000  | 1.573237000  |
| H | 4.266553000  | 2.733664000  | 0.470140000  |
| H | 2.835926000  | 2.451826000  | 2.672564000  |
| H | 1.706124000  | 2.163478000  | -3.245311000 |
| H | 0.258356000  | 2.295333000  | -2.235917000 |
| H | 3.399978000  | 1.484347000  | -1.457783000 |
| H | 3.830758000  | 1.123323000  | 0.981488000  |
| H | 3.843167000  | 3.587566000  | -2.480415000 |
| H | 0.910921000  | 3.725649000  | -3.026010000 |
| H | 1.465047000  | 3.597394000  | -0.564837000 |
| H | 3.816154000  | 4.353389000  | -0.886927000 |
| H | 2.774152000  | 4.958055000  | -2.170795000 |
| H | 0.739102000  | -3.299445000 | 1.742030000  |
| H | 3.120253000  | -4.040929000 | 1.860792000  |
| C | 3.455128000  | -1.249761000 | -0.127728000 |
| C | 3.811515000  | -2.429387000 | 0.595935000  |
| C | 5.138933000  | -2.927072000 | 0.555356000  |
| C | 6.090183000  | -2.345312000 | -0.230037000 |
| C | 5.723403000  | -1.254821000 | -1.042882000 |
| C | 4.459915000  | -0.731538000 | -0.992713000 |
| H | 5.371138000  | -3.803884000 | 1.148732000  |
| H | 7.098516000  | -2.737369000 | -0.261668000 |
| H | 6.442560000  | -0.832778000 | -1.733687000 |
| H | 4.223895000  | 0.052588000  | -1.686314000 |
| C | -0.856956000 | -1.307328000 | -0.488425000 |
| O | -0.416097000 | -1.609054000 | -1.561005000 |
| C | -2.283821000 | -0.921493000 | -0.262085000 |
| C | -3.147307000 | -0.971217000 | -1.349266000 |
| C | -2.737951000 | -0.501658000 | 0.982230000  |
| C | -4.464156000 | -0.598729000 | -1.162953000 |
| H | -2.790924000 | -1.294086000 | -2.317618000 |
| C | -4.065286000 | -0.134468000 | 1.107898000  |
| H | -2.076563000 | -0.458078000 | 1.835913000  |
| C | -4.958222000 | -0.172352000 | 0.055275000  |
| H | -5.991016000 | 0.118716000  | 0.177282000  |

|   |              |              |              |
|---|--------------|--------------|--------------|
| N | -5.387301000 | -0.651935000 | -2.311812000 |
| O | -6.537132000 | -0.320928000 | -2.120471000 |
| O | -4.936665000 | -1.023293000 | -3.373052000 |
| N | -4.551305000 | 0.324247000  | 2.422366000  |
| O | -3.748013000 | 0.374023000  | 3.328131000  |
| O | -5.721723000 | 0.624194000  | 2.512074000  |

**SCF Done: E(RM062X) = -1605.02617999**

**# of imaginary frequencies = 1 (-52.6247)**

**(M)-1'a**

|   |              |              |              |
|---|--------------|--------------|--------------|
| C | -0.827897000 | -0.190183000 | 0.348493000  |
| C | -1.280684000 | -0.971488000 | -0.724221000 |
| C | -2.631995000 | -1.096573000 | -1.018984000 |
| C | -3.587427000 | -0.444744000 | -0.249247000 |
| C | -3.150739000 | 0.332344000  | 0.815236000  |
| C | -1.795191000 | 0.466754000  | 1.120964000  |
| H | -2.936977000 | -1.709973000 | -1.862062000 |
| H | -3.881279000 | 0.851498000  | 1.425815000  |
| C | 2.919251000  | 0.545792000  | -0.251341000 |
| C | 1.413241000  | 0.715325000  | -0.457207000 |
| C | 0.659304000  | -0.066729000 | 0.640314000  |
| C | 1.280366000  | -1.422215000 | 0.908009000  |
| C | 2.464999000  | -1.822264000 | 0.457319000  |
| C | 3.330202000  | -0.916523000 | -0.380397000 |
| H | 3.189120000  | 0.899405000  | 0.749253000  |
| H | 3.474971000  | 1.157309000  | -0.966796000 |
| H | 1.156481000  | 0.253267000  | -1.415701000 |
| H | 0.755055000  | 0.507908000  | 1.566529000  |
| H | 3.270720000  | -1.238235000 | -1.427957000 |
| H | 4.376500000  | -1.044664000 | -0.085276000 |
| O | -0.347350000 | -1.614478000 | -1.487624000 |
| C | -5.051447000 | -0.592155000 | -0.567302000 |
| H | -5.656564000 | 0.056826000  | 0.064748000  |
| H | -5.252291000 | -0.340022000 | -1.609996000 |
| H | -5.381079000 | -1.621415000 | -0.411030000 |
| C | -1.408678000 | 1.340306000  | 2.290006000  |
| H | -0.780703000 | 2.176032000  | 1.973122000  |
| H | -2.298943000 | 1.750359000  | 2.764614000  |
| H | -0.851286000 | 0.781820000  | 3.044787000  |
| C | 0.971628000  | 2.191689000  | -0.520032000 |
| H | -0.116436000 | 2.206268000  | -0.389753000 |
| C | 1.592033000  | 3.056698000  | 0.579978000  |
| H | 1.492869000  | 2.607351000  | 1.570761000  |
| H | 2.657023000  | 3.216268000  | 0.394101000  |
| H | 1.111125000  | 4.036613000  | 0.608110000  |
| C | 1.270207000  | 2.799913000  | -1.890546000 |
| H | 2.342790000  | 2.787380000  | -2.101085000 |
| H | 0.763330000  | 2.247166000  | -2.684050000 |
| H | 0.938384000  | 3.839467000  | -1.935024000 |
| H | 0.683894000  | -2.105275000 | 1.508851000  |
| C | 3.006614000  | -3.196875000 | 0.723471000  |
| H | 3.215538000  | -3.712416000 | -0.218936000 |
| H | 3.952652000  | -3.143598000 | 1.269669000  |
| H | 2.305805000  | -3.801668000 | 1.299095000  |
| H | -0.794616000 | -2.116285000 | -2.177882000 |

**SCF Done: E(RM062X) = -776.692344539**

**# of imaginary frequencies = 0**

**(P)-1'a**

|   |             |              |              |
|---|-------------|--------------|--------------|
| C | 0.816418000 | -0.252188000 | -0.321151000 |
|---|-------------|--------------|--------------|

|   |              |              |              |
|---|--------------|--------------|--------------|
| C | 1.751047000  | 0.550436000  | -0.990925000 |
| C | 3.114954000  | 0.450533000  | -0.754891000 |
| C | 3.601404000  | -0.462187000 | 0.172780000  |
| C | 2.686257000  | -1.258610000 | 0.846668000  |
| C | 1.311117000  | -1.172622000 | 0.614744000  |
| H | 3.799674000  | 1.096254000  | -1.296838000 |
| H | 3.047208000  | -1.971579000 | 1.580187000  |
| C | -2.900566000 | 0.657901000  | 0.237011000  |
| C | -1.390174000 | 0.757569000  | 0.458808000  |
| C | -0.663023000 | -0.066082000 | -0.629013000 |
| C | -1.351622000 | -1.382643000 | -0.912889000 |
| C | -2.558044000 | -1.726905000 | -0.473219000 |
| C | -3.380922000 | -0.783287000 | 0.365618000  |
| H | -3.139725000 | 1.019407000  | -0.768323000 |
| H | -3.435778000 | 1.296993000  | 0.943322000  |
| H | -1.169166000 | 0.296029000  | 1.428341000  |
| H | -0.710558000 | 0.514047000  | -1.554985000 |
| H | -3.339740000 | -1.107630000 | 1.413917000  |
| H | -4.431480000 | -0.862364000 | 0.069047000  |
| O | 1.273484000  | 1.460879000  | -1.895307000 |
| C | 5.081063000  | -0.578866000 | 0.423896000  |
| H | 5.283572000  | -1.227646000 | 1.275348000  |
| H | 5.590352000  | -0.995450000 | -0.447799000 |
| H | 5.522611000  | 0.398879000  | 0.623580000  |
| C | 0.418817000  | -2.115165000 | 1.388930000  |
| H | -0.502690000 | -1.644824000 | 1.725417000  |
| H | 0.128775000  | -2.969220000 | 0.773190000  |
| H | 0.951971000  | -2.494286000 | 2.260584000  |
| C | -0.880201000 | 2.210916000  | 0.536438000  |
| H | 0.211757000  | 2.171062000  | 0.471178000  |
| C | -1.384027000 | 3.090998000  | -0.608269000 |
| H | -1.190372000 | 2.642766000  | -1.584002000 |
| H | -2.458077000 | 3.272338000  | -0.518483000 |
| H | -0.883035000 | 4.060997000  | -0.583738000 |
| C | -1.230864000 | 2.848013000  | 1.881738000  |
| H | -2.312922000 | 2.920925000  | 2.016894000  |
| H | -0.824549000 | 2.266104000  | 2.711776000  |
| H | -0.824115000 | 3.859424000  | 1.946549000  |
| H | -0.789031000 | -2.088759000 | -1.519953000 |
| C | -3.163520000 | -3.071991000 | -0.750460000 |
| H | -2.490681000 | -3.705383000 | -1.328924000 |
| H | -3.398427000 | -3.583286000 | 0.188426000  |
| H | -4.104919000 | -2.971101000 | -1.297749000 |
| H | 2.012793000  | 1.944353000  | -2.279383000 |

**SCF Done: E(RM062X) = -776.692423773**

**# of imaginary frequencies = 0**

### TS1-1'a

|   |              |              |              |
|---|--------------|--------------|--------------|
| C | -2.228051000 | 3.236335000  | -0.655987000 |
| C | -1.113894000 | 1.403945000  | 0.584242000  |
| C | -1.676140000 | 1.844463000  | -0.538642000 |
| C | 1.848466000  | 0.983044000  | 0.647725000  |
| C | 3.193984000  | 0.877265000  | 0.290948000  |
| C | -0.561421000 | -0.001775000 | 0.758390000  |
| C | 0.959528000  | -0.100604000 | 0.458774000  |
| C | -1.868047000 | 0.966337000  | -1.747308000 |
| C | 3.739944000  | -0.286170000 | -0.228893000 |
| C | 1.564702000  | -1.303678000 | 0.046378000  |
| C | 2.905385000  | -1.385050000 | -0.318418000 |
| C | -1.331439000 | -0.456061000 | -1.561358000 |

|   |              |              |              |
|---|--------------|--------------|--------------|
| C | -1.477033000 | -0.917230000 | -0.105931000 |
| C | -3.063625000 | -1.226307000 | 1.867238000  |
| C | -2.948176000 | -0.930704000 | 0.370771000  |
| C | -3.745861000 | -1.974204000 | -0.415638000 |
| H | -2.082406000 | 3.805858000  | 0.262281000  |
| H | -3.298040000 | 3.210307000  | -0.883385000 |
| H | -1.088342000 | 2.073797000  | 1.434524000  |
| H | -1.744450000 | 3.773821000  | -1.476870000 |
| H | 3.838055000  | 1.736165000  | 0.443750000  |
| H | -0.679210000 | -0.284967000 | 1.808850000  |
| H | -2.945304000 | 0.940281000  | -1.957675000 |
| H | -1.838301000 | -1.138169000 | -2.245230000 |
| H | -1.413881000 | 1.440253000  | -2.623342000 |
| H | -2.496946000 | -2.125872000 | 2.127704000  |
| H | -2.692564000 | -0.402803000 | 2.479061000  |
| H | -1.141836000 | -1.944948000 | -0.029969000 |
| H | -0.271805000 | -0.486738000 | -1.827196000 |
| H | -3.313716000 | -2.970282000 | -0.280163000 |
| H | -4.106487000 | -1.395514000 | 2.143001000  |
| H | -3.405105000 | 0.045477000  | 0.189732000  |
| H | -3.766653000 | -1.757897000 | -1.484471000 |
| H | -4.779612000 | -2.008448000 | -0.065971000 |
| C | 5.178093000  | -0.358867000 | -0.663533000 |
| H | 5.788481000  | 0.360897000  | -0.118160000 |
| H | 5.589475000  | -1.355709000 | -0.502687000 |
| H | 5.269121000  | -0.131503000 | -1.728325000 |
| H | 3.295595000  | -2.339402000 | -0.660517000 |
| O | 0.834291000  | -2.461672000 | 0.021857000  |
| C | 1.467065000  | 2.288409000  | 1.312799000  |
| H | 0.886099000  | 2.938025000  | 0.659145000  |
| H | 0.883062000  | 2.119580000  | 2.217430000  |
| H | 2.374388000  | 2.818835000  | 1.599190000  |
| H | 1.405183000  | -3.182548000 | -0.264917000 |

**SCF Done: E(RM062X) = -776.671380618**

**# of imaginary frequencies = 1 (-50.5621)**

### TS2-1'a

|   |              |              |              |
|---|--------------|--------------|--------------|
| C | 2.174409000  | 3.306987000  | 0.531920000  |
| C | 1.062257000  | 1.417925000  | -0.623311000 |
| C | 1.655379000  | 1.898519000  | 0.466724000  |
| C | -1.828359000 | 0.934193000  | -0.688984000 |
| C | -3.171330000 | 0.924376000  | -0.327732000 |
| C | 0.552718000  | -0.012783000 | -0.755505000 |
| C | -0.963206000 | -0.152145000 | -0.449389000 |
| C | 1.919502000  | 1.056439000  | 1.687641000  |
| C | -3.749384000 | -0.202067000 | 0.230038000  |
| C | -1.594294000 | -1.332357000 | 0.004902000  |
| C | -2.948448000 | -1.326586000 | 0.350055000  |
| C | 1.367443000  | -0.364379000 | 1.567746000  |
| C | 1.493122000  | -0.875921000 | 0.127807000  |
| C | 3.039668000  | -1.366434000 | -1.834128000 |
| C | 2.954210000  | -0.898048000 | -0.379872000 |
| C | 3.807499000  | -1.814858000 | 0.500274000  |
| H | 1.982570000  | 3.848836000  | -0.394272000 |
| H | 3.252214000  | 3.313158000  | 0.721804000  |
| H | 0.955411000  | 2.068895000  | -1.480042000 |
| H | 1.706331000  | 3.853704000  | 1.355641000  |
| H | -3.770413000 | 1.811616000  | -0.511548000 |
| H | 0.677488000  | -0.313280000 | -1.800440000 |
| H | 3.007085000  | 1.028333000  | 1.837459000  |

|   |              |              |              |
|---|--------------|--------------|--------------|
| H | 1.874629000  | -1.028128000 | 2.269499000  |
| H | 1.516280000  | 1.554668000  | 2.574924000  |
| H | 2.502023000  | -2.310945000 | -1.967387000 |
| H | 2.621212000  | -0.637691000 | -2.529044000 |
| H | 1.189642000  | -1.914686000 | 0.099971000  |
| H | 0.309519000  | -0.370360000 | 1.844367000  |
| H | 3.391135000  | -2.826949000 | 0.520959000  |
| H | 4.080105000  | -1.531430000 | -2.120832000 |
| H | 3.376779000  | 0.107977000  | -0.327198000 |
| H | 3.873086000  | -1.455636000 | 1.527954000  |
| H | 4.824320000  | -1.880968000 | 0.108625000  |
| C | -5.188722000 | -0.207279000 | 0.666695000  |
| H | -5.799071000 | 0.427048000  | 0.023250000  |
| H | -5.599416000 | -1.216741000 | 0.649446000  |
| H | -5.281288000 | 0.171667000  | 1.687278000  |
| H | -3.391495000 | -2.248286000 | 0.710903000  |
| C | -0.932175000 | -2.691642000 | 0.098878000  |
| H | -0.331147000 | -2.802066000 | 1.003333000  |
| H | -0.296996000 | -2.897358000 | -0.762314000 |
| H | -1.705884000 | -3.457621000 | 0.127729000  |
| O | -1.350528000 | 2.033262000  | -1.346790000 |
| H | -2.061625000 | 2.676512000  | -1.438297000 |

**SCF Done: E(RM062X) = -776.670417725**

**# of imaginary frequencies = 1 (-48.5440)**

**(M)-1'b**

|   |              |              |              |
|---|--------------|--------------|--------------|
| C | 0.781786000  | 0.076705000  | -0.499406000 |
| C | 1.296166000  | -0.889771000 | 0.388310000  |
| C | 2.661506000  | -1.008848000 | 0.618457000  |
| C | 3.561005000  | -0.165055000 | -0.030914000 |
| C | 3.063568000  | 0.787617000  | -0.903341000 |
| C | 1.691810000  | 0.918105000  | -1.144360000 |
| H | 3.043063000  | -1.754362000 | 1.302985000  |
| H | 3.752545000  | 1.451695000  | -1.413686000 |
| C | -2.980542000 | 0.516435000  | 0.292513000  |
| C | -1.478066000 | 0.705736000  | 0.508391000  |
| C | -0.717681000 | 0.187733000  | -0.732473000 |
| C | -1.292823000 | -1.111928000 | -1.257401000 |
| C | -2.452366000 | -1.641693000 | -0.881923000 |
| C | -3.331901000 | -0.958372000 | 0.133220000  |
| H | -3.285645000 | 1.049547000  | -0.614052000 |
| H | -3.544419000 | 0.949745000  | 1.122615000  |
| H | -1.184109000 | 0.075462000  | 1.353192000  |
| H | -0.859396000 | 0.929650000  | -1.524147000 |
| H | -3.235299000 | -1.479169000 | 1.094522000  |
| H | -4.379310000 | -1.069270000 | -0.165051000 |
| O | 0.380527000  | -1.687974000 | 1.000568000  |
| C | 0.849655000  | -2.692171000 | 1.878435000  |
| H | -0.034251000 | -3.214890000 | 2.234907000  |
| H | 1.504046000  | -3.396536000 | 1.359399000  |
| H | 1.382985000  | -2.258286000 | 2.727768000  |
| C | 5.038673000  | -0.304962000 | 0.222013000  |
| H | 5.603548000  | 0.446966000  | -0.327903000 |
| H | 5.264839000  | -0.193896000 | 1.284241000  |
| H | 5.394222000  | -1.290629000 | -0.085242000 |
| C | 1.236634000  | 1.990312000  | -2.105373000 |
| H | 0.586765000  | 2.717806000  | -1.614029000 |
| H | 2.096150000  | 2.525648000  | -2.506262000 |
| H | 0.679764000  | 1.570884000  | -2.945708000 |
| C | -1.093924000 | 2.158280000  | 0.856350000  |

|   |              |              |              |
|---|--------------|--------------|--------------|
| H | -0.010915000 | 2.246149000  | 0.713860000  |
| C | -1.775144000 | 3.196272000  | -0.039019000 |
| H | -1.683821000 | 2.956011000  | -1.100764000 |
| H | -2.840463000 | 3.269886000  | 0.193182000  |
| H | -1.333415000 | 4.182209000  | 0.119636000  |
| C | -1.382523000 | 2.468875000  | 2.325264000  |
| H | -2.448122000 | 2.366724000  | 2.546794000  |
| H | -0.833967000 | 1.792911000  | 2.984301000  |
| H | -1.092182000 | 3.492744000  | 2.570617000  |
| H | -0.683870000 | -1.636077000 | -1.990870000 |
| C | -2.948822000 | -2.955480000 | -1.412458000 |
| H | -3.119424000 | -3.658008000 | -0.590807000 |
| H | -3.907220000 | -2.831862000 | -1.924710000 |
| H | -2.238384000 | -3.404008000 | -2.107046000 |

**SCF Done: E(RM062X) = -815.980035946**

**# of imaginary frequencies = 0**

**(P)-1'b**

|   |              |              |              |
|---|--------------|--------------|--------------|
| C | 0.664493000  | -0.444737000 | -0.214277000 |
| C | 1.721343000  | 0.353345000  | -0.699246000 |
| C | 3.048359000  | 0.060859000  | -0.414780000 |
| C | 3.367642000  | -1.044281000 | 0.372575000  |
| C | 2.336790000  | -1.828585000 | 0.858657000  |
| C | 0.993894000  | -1.548284000 | 0.578487000  |
| H | 3.846760000  | 0.683986000  | -0.794592000 |
| H | 2.571259000  | -2.686258000 | 1.480102000  |
| C | -2.952326000 | 0.826078000  | 0.301174000  |
| C | -1.459633000 | 0.697321000  | 0.611267000  |
| C | -0.765639000 | -0.045817000 | -0.553787000 |
| C | -1.581333000 | -1.215819000 | -1.056642000 |
| C | -2.848151000 | -1.460546000 | -0.736373000 |
| C | -3.610821000 | -0.544371000 | 0.185843000  |
| H | -3.075363000 | 1.356688000  | -0.648581000 |
| H | -3.454998000 | 1.420548000  | 1.067761000  |
| H | -1.361831000 | 0.073900000  | 1.508159000  |
| H | -0.696948000 | 0.659876000  | -1.385650000 |
| H | -3.687501000 | -1.015539000 | 1.174736000  |
| H | -4.638320000 | -0.443280000 | -0.177464000 |
| O | 1.358561000  | 1.430113000  | -1.453175000 |
| C | 2.368360000  | 2.332606000  | -1.859235000 |
| H | 1.858221000  | 3.135381000  | -2.385704000 |
| H | 2.899088000  | 2.741470000  | -0.995855000 |
| H | 3.082719000  | 1.853313000  | -2.532695000 |
| C | 4.807850000  | -1.356261000 | 0.681223000  |
| H | 4.891240000  | -2.240965000 | 1.311473000  |
| H | 5.372382000  | -1.536066000 | -0.235905000 |
| H | 5.284922000  | -0.521607000 | 1.198757000  |
| C | -0.040510000 | -2.488380000 | 1.153874000  |
| H | -0.928542000 | -1.971415000 | 1.511010000  |
| H | -0.375373000 | -3.207336000 | 0.403120000  |
| H | 0.391926000  | -3.046587000 | 1.984150000  |
| C | -0.786627000 | 2.046322000  | 0.936447000  |
| H | 0.294358000  | 1.874803000  | 0.929380000  |
| C | -1.091490000 | 3.139076000  | -0.089364000 |
| H | -0.885166000 | 2.810432000  | -1.109095000 |
| H | -2.137799000 | 3.449716000  | -0.030904000 |
| H | -0.475179000 | 4.019315000  | 0.106654000  |
| C | -1.158962000 | 2.525629000  | 2.340247000  |
| H | -2.230904000 | 2.721756000  | 2.422751000  |
| H | -0.891864000 | 1.782381000  | 3.094545000  |

|   |              |              |              |
|---|--------------|--------------|--------------|
| H | -0.637019000 | 3.454232000  | 2.581014000  |
| H | -1.065352000 | -1.897865000 | -1.729167000 |
| C | -3.587736000 | -2.666745000 | -1.237337000 |
| H | -2.955343000 | -3.295136000 | -1.864855000 |
| H | -3.947445000 | -3.268230000 | -0.396514000 |
| H | -4.469438000 | -2.372870000 | -1.813731000 |

**SCF Done: E(RM062X) = -815.980286713**

**# of imaginary frequencies = 0**

**TS1-1'b**

|   |              |              |              |
|---|--------------|--------------|--------------|
| C | -2.516957000 | 3.213461000  | -0.811082000 |
| C | -1.309153000 | 1.519133000  | 0.533426000  |
| C | -1.867639000 | 1.872485000  | -0.621479000 |
| C | 1.658804000  | 1.334252000  | 0.656478000  |
| C | 3.012277000  | 1.335769000  | 0.297566000  |
| C | -0.657730000 | 0.166436000  | 0.775160000  |
| C | 0.872243000  | 0.177863000  | 0.495803000  |
| C | -1.957716000 | 0.936318000  | -1.798338000 |
| C | 3.650237000  | 0.213112000  | -0.191330000 |
| C | 1.579923000  | -0.993911000 | 0.125739000  |
| C | 2.920190000  | -0.967421000 | -0.244615000 |
| C | -1.351620000 | -0.446294000 | -1.532972000 |
| C | -1.500220000 | -0.844048000 | -0.059674000 |
| C | -3.115812000 | -1.100347000 | 1.900645000  |
| C | -2.979000000 | -0.923271000 | 0.387698000  |
| C | -3.678582000 | -2.084554000 | -0.323497000 |
| H | -2.437834000 | 3.829021000  | 0.085383000  |
| H | -3.575752000 | 3.098941000  | -1.062372000 |
| H | -1.359721000 | 2.220666000  | 1.356601000  |
| H | -2.052255000 | 3.751797000  | -1.642306000 |
| H | 3.578305000  | 2.252391000  | 0.421482000  |
| H | -0.769719000 | -0.082488000 | 1.834921000  |
| H | -3.021781000 | 0.840724000  | -2.050657000 |
| H | -1.811382000 | -1.184991000 | -2.191046000 |
| H | -1.494073000 | 1.400195000  | -2.674834000 |
| H | -2.497163000 | -1.933332000 | 2.249480000  |
| H | -2.817938000 | -0.204267000 | 2.447238000  |
| H | -1.106932000 | -1.844444000 | 0.075285000  |
| H | -0.287242000 | -0.435754000 | -1.780387000 |
| H | -3.192565000 | -3.033544000 | -0.077550000 |
| H | -4.152196000 | -1.318387000 | 2.166524000  |
| H | -3.499186000 | -0.001878000 | 0.114184000  |
| H | -3.667141000 | -1.971056000 | -1.408249000 |
| H | -4.722163000 | -2.153030000 | -0.009789000 |
| C | 5.090383000  | 0.243742000  | -0.625833000 |
| H | 5.582255000  | 1.155493000  | -0.287928000 |
| H | 5.639275000  | -0.612158000 | -0.230066000 |
| H | 5.165532000  | 0.205117000  | -1.715037000 |
| H | 3.416811000  | -1.874299000 | -0.559220000 |
| C | 1.565199000  | -3.360764000 | -0.228900000 |
| H | 1.889673000  | -3.296988000 | -1.270066000 |
| H | 2.424902000  | -3.576585000 | 0.409621000  |
| H | 0.831414000  | -4.156601000 | -0.127267000 |
| O | 0.907327000  | -2.177209000 | 0.177521000  |
| C | 1.169756000  | 2.621082000  | 1.287290000  |
| H | 0.561458000  | 3.217451000  | 0.607902000  |
| H | 0.578145000  | 2.428684000  | 2.181992000  |
| H | 2.031162000  | 3.218733000  | 1.583476000  |

**SCF Done: E(RM062X) = -815.957921337**

**# of imaginary frequencies = 1 (-44.6101)**

**TS2-1'b**

|   |              |              |              |
|---|--------------|--------------|--------------|
| C | 1.972121000  | 3.251707000  | 0.957421000  |
| C | 1.030137000  | 1.414484000  | -0.413088000 |
| C | 1.589585000  | 1.817194000  | 0.725414000  |
| C | -1.807120000 | 0.643698000  | -0.498110000 |
| C | -3.119985000 | 0.453737000  | -0.083461000 |
| C | 0.660813000  | -0.034208000 | -0.716304000 |
| C | -0.824267000 | -0.373917000 | -0.410789000 |
| C | 1.954303000  | 0.865265000  | 1.834538000  |
| C | -3.546087000 | -0.792113000 | 0.359762000  |
| C | -1.307619000 | -1.656560000 | -0.092151000 |
| C | -2.639955000 | -1.833042000 | 0.304662000  |
| C | 1.554174000  | -0.581222000 | 1.541013000  |
| C | 1.702864000  | -0.895800000 | 0.047529000  |
| C | 3.251100000  | -0.959020000 | -1.973287000 |
| C | 3.148898000  | -0.704259000 | -0.467973000 |
| C | 4.104006000  | -1.643854000 | 0.272593000  |
| H | 1.717172000  | 3.878560000  | 0.102631000  |
| H | 3.046719000  | 3.340026000  | 1.145143000  |
| H | 0.855708000  | 2.149258000  | -1.187202000 |
| H | 1.464491000  | 3.649581000  | 1.840964000  |
| H | -3.830502000 | 1.267277000  | -0.129601000 |
| H | 0.793674000  | -0.190199000 | -1.791335000 |
| H | 3.040525000  | 0.935110000  | 1.980547000  |
| H | 2.144187000  | -1.267442000 | 2.150323000  |
| H | 1.511983000  | 1.205347000  | 2.776283000  |
| H | 2.802527000  | -1.923577000 | -2.232803000 |
| H | 2.752424000  | -0.185480000 | -2.558215000 |
| H | 1.506665000  | -1.949214000 | -0.105814000 |
| H | 0.509336000  | -0.736085000 | 1.823227000  |
| H | 3.789790000  | -2.685591000 | 0.153712000  |
| H | 4.296934000  | -0.982434000 | -2.285777000 |
| H | 3.473082000  | 0.321911000  | -0.279905000 |
| H | 4.152113000  | -1.425521000 | 1.340049000  |
| H | 5.115398000  | -1.553318000 | -0.128159000 |
| C | -4.955901000 | -0.992814000 | 0.845430000  |
| H | -5.672155000 | -0.490728000 | 0.193357000  |
| H | -5.209624000 | -2.051768000 | 0.886748000  |
| H | -5.080325000 | -0.578233000 | 1.848551000  |
| H | -2.970162000 | -2.832277000 | 0.566848000  |
| C | -2.302372000 | 2.924024000  | -1.013595000 |
| H | -2.589908000 | 3.149239000  | 0.016031000  |
| H | -1.748984000 | 3.763628000  | -1.427514000 |
| H | -3.198831000 | 2.751990000  | -1.613891000 |
| C | -0.514136000 | -2.943123000 | -0.197084000 |
| H | 0.112772000  | -3.121453000 | 0.678717000  |
| H | 0.119690000  | -2.962583000 | -1.083035000 |
| H | -1.210398000 | -3.777496000 | -0.272351000 |
| O | -1.424707000 | 1.817551000  | -1.067831000 |

**SCF Done: E(RM062X) = -815.957351706****# of imaginary frequencies = 1 (-47.3146)****(M)-1'c**

|   |             |              |              |
|---|-------------|--------------|--------------|
| C | 2.090887000 | -2.882092000 | 1.285240000  |
| C | 2.353529000 | -1.375405000 | 1.271892000  |
| C | 1.958480000 | -0.809065000 | -0.106850000 |
| C | 2.367969000 | -1.704395000 | -1.256813000 |
| C | 2.806269000 | -2.952250000 | -1.125064000 |
| C | 2.930942000 | -3.596931000 | 0.232187000  |



|   |              |              |              |
|---|--------------|--------------|--------------|
| H | 2.294498000  | -3.297391000 | 2.274904000  |
| H | 1.032781000  | -3.064600000 | 1.071679000  |
| H | 3.431413000  | -1.228006000 | 1.400316000  |
| H | 0.865833000  | -0.789451000 | -0.123778000 |
| H | 2.282091000  | -1.265909000 | -2.248161000 |
| H | 2.633251000  | -4.647141000 | 0.158467000  |
| H | 3.988284000  | -3.604413000 | 0.527063000  |
| C | 3.223844000  | -3.787161000 | -2.299927000 |
| H | 2.607717000  | -4.687469000 | -2.373091000 |
| H | 4.258370000  | -4.122457000 | -2.179330000 |
| H | 3.145992000  | -3.233943000 | -3.235550000 |
| C | 1.649308000  | -0.618960000 | 2.417702000  |
| H | 1.704301000  | 0.448290000  | 2.176805000  |
| C | 0.171600000  | -0.988666000 | 2.565909000  |
| H | -0.326400000 | -0.300323000 | 3.252040000  |
| H | 0.059664000  | -1.997446000 | 2.970312000  |
| H | -0.362013000 | -0.951486000 | 1.613559000  |
| C | 2.375756000  | -0.821767000 | 3.746817000  |
| H | 1.890688000  | -0.252810000 | 4.542344000  |
| H | 3.415163000  | -0.494051000 | 3.680842000  |
| H | 2.369586000  | -1.873311000 | 4.043763000  |
| C | 3.169873000  | 3.338952000  | -0.728801000 |
| C | 1.837833000  | 2.988721000  | -0.543601000 |
| C | 1.508782000  | 1.665336000  | -0.342493000 |
| C | 2.433546000  | 0.621984000  | -0.313310000 |
| C | 3.781251000  | 0.984691000  | -0.472343000 |
| C | 4.114405000  | 2.323542000  | -0.682892000 |
| H | 1.050997000  | 3.733489000  | -0.548111000 |
| H | 5.161696000  | 2.577567000  | -0.810407000 |
| C | 3.560517000  | 4.769802000  | -0.980108000 |
| H | 3.285138000  | 5.071694000  | -1.992857000 |
| H | 3.050911000  | 5.441449000  | -0.288205000 |
| H | 4.635131000  | 4.908038000  | -0.867996000 |
| C | 4.919458000  | -0.003754000 | -0.381775000 |
| H | 4.633218000  | -1.003176000 | -0.698648000 |
| H | 5.753001000  | 0.331610000  | -0.998730000 |
| H | 5.281930000  | -0.068851000 | 0.647435000  |
| O | 0.155602000  | 1.398698000  | -0.074719000 |
| C | -0.589961000 | 0.923711000  | -1.083592000 |
| O | -0.193891000 | 0.736958000  | -2.197928000 |
| C | -4.593062000 | -0.013262000 | 0.133090000  |
| C | -4.155873000 | -0.190385000 | -1.165568000 |
| C | -2.871441000 | 0.113028000  | -1.571744000 |
| C | -1.983619000 | 0.625248000  | -0.634701000 |
| C | -2.382580000 | 0.825594000  | 0.680920000  |
| C | -3.677511000 | 0.495131000  | 1.032620000  |
| H | -5.600388000 | -0.263381000 | 0.430143000  |
| H | -2.557723000 | -0.045601000 | -2.593902000 |
| H | -1.703366000 | 1.224491000  | 1.420077000  |
| N | -5.104781000 | -0.733480000 | -2.155028000 |
| O | -4.705136000 | -0.878913000 | -3.288390000 |
| O | -6.221765000 | -0.998224000 | -1.769324000 |
| N | -4.099530000 | 0.686549000  | 2.432097000  |
| O | -3.267527000 | 1.089508000  | 3.215030000  |
| O | -5.248882000 | 0.426125000  | 2.708925000  |

**SCF Done: E(RM062X) = -1530.02574172**

**# of imaginary frequencies = 0**

**(P)-1'c**

|   |              |             |             |
|---|--------------|-------------|-------------|
| C | -1.102675000 | 2.880242000 | 0.961759000 |
|---|--------------|-------------|-------------|

|   |              |              |              |
|---|--------------|--------------|--------------|
| C | -1.877512000 | 1.815136000  | 0.182922000  |
| C | -2.108386000 | 0.596631000  | 1.104471000  |
| C | -0.842185000 | 0.221370000  | 1.848615000  |
| C | 0.236720000  | 0.993330000  | 1.953593000  |
| C | 0.278621000  | 2.380027000  | 1.366211000  |
| H | -1.010323000 | 3.795099000  | 0.372111000  |
| H | -1.663946000 | 3.137779000  | 1.865400000  |
| H | -1.243418000 | 1.475780000  | -0.644925000 |
| H | -2.846455000 | 0.894299000  | 1.855688000  |
| H | -0.832676000 | -0.765789000 | 2.305080000  |
| H | 0.730100000  | 3.058786000  | 2.096783000  |
| H | 0.954623000  | 2.389849000  | 0.501680000  |
| C | 1.480242000  | 0.544614000  | 2.666149000  |
| H | 1.651306000  | 1.145834000  | 3.563257000  |
| H | 2.357446000  | 0.685237000  | 2.024624000  |
| H | 1.425574000  | -0.505897000 | 2.954334000  |
| C | -3.185357000 | 2.353842000  | -0.430651000 |
| H | -3.797370000 | 1.487125000  | -0.703158000 |
| C | -3.992094000 | 3.220947000  | 0.539347000  |
| H | -4.988359000 | 3.412533000  | 0.136337000  |
| H | -3.505404000 | 4.187088000  | 0.692005000  |
| H | -4.111416000 | 2.753222000  | 1.519180000  |
| C | -2.906732000 | 3.131178000  | -1.717146000 |
| H | -3.835473000 | 3.504489000  | -2.153070000 |
| H | -2.413300000 | 2.499490000  | -2.458260000 |
| H | -2.262753000 | 3.993022000  | -1.524630000 |
| C | -3.721550000 | -2.810152000 | -1.092883000 |
| C | -2.405611000 | -2.405265000 | -1.263040000 |
| C | -1.927164000 | -1.328357000 | -0.542834000 |
| C | -2.691190000 | -0.596918000 | 0.360988000  |
| C | -4.024043000 | -1.010893000 | 0.530047000  |
| C | -4.507811000 | -2.097743000 | -0.193542000 |
| H | -1.742443000 | -2.916621000 | -1.950582000 |
| H | -5.540562000 | -2.397849000 | -0.051357000 |
| C | -4.267501000 | -3.998299000 | -1.837091000 |
| H | -3.816465000 | -4.083419000 | -2.825680000 |
| H | -4.052788000 | -4.921960000 | -1.294893000 |
| H | -5.348384000 | -3.924655000 | -1.953430000 |
| C | -4.957870000 | -0.300371000 | 1.477763000  |
| H | -5.107716000 | 0.740738000  | 1.185461000  |
| H | -5.930345000 | -0.789784000 | 1.485223000  |
| H | -4.572284000 | -0.301954000 | 2.499028000  |
| O | -0.605377000 | -0.924073000 | -0.777909000 |
| C | 0.364742000  | -1.631518000 | -0.176800000 |
| O | 0.197522000  | -2.644277000 | 0.439127000  |
| C | 4.224025000  | 0.200943000  | -0.530957000 |
| C | 4.046391000  | -1.039158000 | 0.051627000  |
| C | 2.810768000  | -1.647750000 | 0.156537000  |
| C | 1.700935000  | -0.989098000 | -0.355551000 |
| C | 1.833566000  | 0.256216000  | -0.954056000 |
| C | 3.092340000  | 0.824089000  | -1.019166000 |
| H | 5.197740000  | 0.662969000  | -0.594253000 |
| H | 2.703187000  | -2.611208000 | 0.634718000  |
| H | 0.977128000  | 0.781193000  | -1.351403000 |
| N | 3.232648000  | 2.160736000  | -1.623036000 |
| O | 2.213120000  | 2.750965000  | -1.910797000 |
| O | 4.353521000  | 2.585717000  | -1.787762000 |
| N | 5.229078000  | -1.732400000 | 0.594545000  |
| O | 5.054015000  | -2.815951000 | 1.105125000  |
| O | 6.298282000  | -1.172630000 | 0.494249000  |

SCF Done: E(RM062X) = -1530.03361853

# of imaginary frequencies = 0

TS1-1'c

|   |              |              |              |
|---|--------------|--------------|--------------|
| C | 4.589915000  | -3.592806000 | -0.364695000 |
| C | 3.206473000  | -1.660587000 | -1.059317000 |
| C | 3.495854000  | -2.586928000 | -0.149791000 |
| C | 3.891883000  | 1.199149000  | -0.492658000 |
| C | 4.311696000  | 2.371354000  | 0.134514000  |
| C | 2.093351000  | -0.638241000 | -0.895833000 |
| C | 2.583142000  | 0.701171000  | -0.284197000 |
| C | 2.712124000  | -2.745624000 | 1.126406000  |
| C | 3.492359000  | 3.133420000  | 0.954121000  |
| C | 1.758875000  | 1.553535000  | 0.459794000  |
| C | 2.180179000  | 2.715071000  | 1.080572000  |
| C | 1.546418000  | -1.759364000 | 1.261357000  |
| C | 0.975921000  | -1.383465000 | -0.111102000 |
| C | 0.109230000  | -2.282013000 | -2.340187000 |
| C | 0.389236000  | -2.597211000 | -0.870846000 |
| C | -0.913046000 | -3.042663000 | -0.199274000 |
| H | 5.102653000  | -3.432976000 | -1.313196000 |
| H | 4.186686000  | -4.609578000 | -0.353167000 |
| H | 3.764982000  | -1.664062000 | -1.986501000 |
| H | 5.326643000  | -3.536412000 | 0.441552000  |
| H | 5.326617000  | 2.710041000  | -0.043818000 |
| H | 1.713543000  | -0.381334000 | -1.889500000 |
| H | 2.339634000  | -3.777108000 | 1.148813000  |
| H | 0.774255000  | -2.182626000 | 1.905549000  |
| H | 3.385733000  | -2.663764000 | 1.984833000  |
| H | -0.480072000 | -1.362924000 | -2.430848000 |
| H | 1.027311000  | -2.154877000 | -2.915499000 |
| H | 0.121104000  | -0.740652000 | 0.046484000  |
| H | 1.889800000  | -0.847003000 | 1.754656000  |
| H | -1.676786000 | -2.264692000 | -0.304115000 |
| H | -0.461017000 | -3.091114000 | -2.800134000 |
| H | 1.095920000  | -3.429794000 | -0.833761000 |
| H | -0.786175000 | -3.248714000 | 0.864472000  |
| H | -1.298528000 | -3.948267000 | -0.670630000 |
| C | 3.997999000  | 4.364432000  | 1.653383000  |
| H | 3.194300000  | 5.082258000  | 1.816231000  |
| H | 4.416014000  | 4.106714000  | 2.629193000  |
| H | 4.784445000  | 4.847978000  | 1.074132000  |
| H | 1.455101000  | 3.284373000  | 1.649461000  |
| O | 0.395111000  | 1.284105000  | 0.660305000  |
| C | 4.891756000  | 0.581521000  | -1.444809000 |
| H | 5.352828000  | -0.318356000 | -1.039356000 |
| H | 4.426607000  | 0.319391000  | -2.394815000 |
| H | 5.679890000  | 1.304428000  | -1.650436000 |
| C | -0.421482000 | 1.467444000  | -0.387483000 |
| O | -0.087242000 | 1.898568000  | -1.453366000 |
| C | -1.813831000 | 1.019271000  | -0.077012000 |
| C | -2.109890000 | 0.331148000  | 1.093294000  |
| C | -2.797573000 | 1.246580000  | -1.030421000 |
| C | -3.402253000 | -0.120586000 | 1.281303000  |
| H | -1.350705000 | 0.131996000  | 1.836434000  |
| C | -4.075360000 | 0.785548000  | -0.781755000 |
| H | -2.561703000 | 1.767093000  | -1.947986000 |
| C | -4.413197000 | 0.094529000  | 0.366158000  |
| H | -5.416377000 | -0.267156000 | 0.534663000  |
| N | -5.126540000 | 1.026815000  | -1.787602000 |

|   |              |              |              |
|---|--------------|--------------|--------------|
| O | -6.235604000 | 0.604530000  | -1.546910000 |
| O | -4.811650000 | 1.631405000  | -2.787897000 |
| N | -3.711368000 | -0.887663000 | 2.501537000  |
| O | -4.868305000 | -1.186994000 | 2.694319000  |
| O | -2.785563000 | -1.173492000 | 3.228626000  |

**SCF Done: E(RM062X) = -1530.00709290**

**# of imaginary frequencies = 1 (-32.0219)**

**TS2-1'c**

|   |              |              |              |
|---|--------------|--------------|--------------|
| C | -0.294836000 | -2.589423000 | 2.346591000  |
| C | -0.993491000 | -1.179330000 | 0.435249000  |
| C | -1.328047000 | -1.985695000 | 1.438801000  |
| C | -3.689743000 | 1.461227000  | -0.351205000 |
| C | -3.931006000 | 2.759510000  | 0.107070000  |
| C | -1.991082000 | -0.570823000 | -0.546290000 |
| C | -2.414569000 | 0.873074000  | -0.164588000 |
| C | -2.747478000 | -2.423725000 | 1.683292000  |
| C | -2.971918000 | 3.555787000  | 0.712085000  |
| C | -1.453439000 | 1.742384000  | 0.366686000  |
| C | -1.696716000 | 3.027120000  | 0.808252000  |
| O | -0.115257000 | 1.343997000  | 0.506329000  |
| C | -3.748454000 | -1.781457000 | 0.721810000  |
| C | -3.135495000 | -1.604320000 | -0.674792000 |
| C | -1.983667000 | -2.727487000 | -2.649857000 |
| C | -2.674535000 | -2.941307000 | -1.301782000 |
| C | -3.870516000 | -3.878803000 | -1.483476000 |
| C | 0.636693000  | 1.311612000  | -0.600432000 |
| O | 0.263242000  | 1.613432000  | -1.698038000 |
| C | -4.856988000 | 0.834013000  | -1.086630000 |
| C | -3.292700000 | 4.931771000  | 1.225686000  |
| H | -0.321246000 | -3.681398000 | 2.287885000  |
| H | -0.495943000 | -2.323784000 | 3.387979000  |
| H | 0.062023000  | -1.008160000 | 0.270795000  |
| H | 0.711905000  | -2.251988000 | 2.096950000  |
| H | -4.924179000 | 3.170667000  | -0.035624000 |
| H | -1.491514000 | -0.473646000 | -1.514831000 |
| H | -2.768678000 | -3.516694000 | 1.583131000  |
| H | -4.665613000 | -2.370804000 | 0.681281000  |
| H | -3.026016000 | -2.220727000 | 2.721620000  |
| H | -2.603501000 | -2.111048000 | -3.308450000 |
| H | -1.013209000 | -2.241006000 | -2.545012000 |
| H | -3.891428000 | -1.235740000 | -1.359365000 |
| H | -4.027819000 | -0.798451000 | 1.108384000  |
| H | -4.635000000 | -3.411337000 | -2.111468000 |
| H | -1.817007000 | -3.684625000 | -3.147226000 |
| H | -1.960614000 | -3.431171000 | -0.635422000 |
| H | -4.331988000 | -4.147605000 | -0.532661000 |
| H | -3.558467000 | -4.803827000 | -1.971346000 |
| H | -4.567500000 | 0.492295000  | -2.080157000 |
| H | -5.299227000 | -0.005962000 | -0.551509000 |
| H | -5.634728000 | 1.584358000  | -1.216051000 |
| H | -2.446375000 | 5.606137000  | 1.094549000  |
| H | -4.155195000 | 5.351606000  | 0.708869000  |
| H | -3.526512000 | 4.898357000  | 2.292218000  |
| H | -0.872165000 | 3.599556000  | 1.215636000  |
| C | 2.017740000  | 0.821930000  | -0.302177000 |
| C | 2.354514000  | 0.316744000  | 0.947722000  |
| C | 2.952173000  | 0.846296000  | -1.328995000 |
| C | 3.636722000  | -0.162160000 | 1.139264000  |
| H | 1.634730000  | 0.286340000  | 1.753578000  |

|   |             |              |              |
|---|-------------|--------------|--------------|
| C | 4.223144000 | 0.369752000  | -1.074966000 |
| H | 2.685072000 | 1.228693000  | -2.304070000 |
| C | 4.600325000 | -0.144058000 | 0.150782000  |
| H | 5.597540000 | -0.519441000 | 0.324629000  |
| N | 3.990542000 | -0.726792000 | 2.454232000  |
| O | 5.141211000 | -1.059592000 | 2.627607000  |
| O | 3.104477000 | -0.824480000 | 3.275069000  |
| N | 5.223204000 | 0.398642000  | -2.158401000 |
| O | 6.330280000 | -0.022272000 | -1.906341000 |
| O | 4.871879000 | 0.841501000  | -3.228841000 |

**SCF Done: E(RM062X) = -1530.00573409**

**# of imaginary frequencies = 1 (-28.6132)**

**(M)-2'a**

|   |              |              |              |
|---|--------------|--------------|--------------|
| C | -2.882543000 | 0.857294000  | -0.184819000 |
| C | -3.556890000 | -0.431494000 | 0.290787000  |
| C | -2.825623000 | -1.681480000 | -0.203218000 |
| C | -1.351595000 | -1.621592000 | 0.206766000  |
| C | -0.675700000 | -0.318313000 | -0.258891000 |
| C | -1.419250000 | 0.928378000  | 0.276555000  |
| H | -3.571658000 | -0.446534000 | 1.390762000  |
| H | -4.601901000 | -0.457875000 | -0.039217000 |
| H | -2.930998000 | 0.906068000  | -1.281583000 |
| H | -3.436610000 | 1.721047000  | 0.196293000  |
| H | -1.281413000 | -1.710738000 | 1.299446000  |
| H | -0.812586000 | -2.481340000 | -0.210862000 |
| H | -0.856966000 | -0.263704000 | -1.341851000 |
| H | -1.446781000 | 0.880083000  | 1.372296000  |
| H | -2.865269000 | -1.680110000 | -1.303525000 |
| C | 0.833847000  | -0.344235000 | -0.052204000 |
| C | 1.667105000  | -0.625097000 | -1.152382000 |
| C | 1.468008000  | -0.137088000 | 1.191770000  |
| C | 3.057008000  | -0.648956000 | -1.045157000 |
| C | 2.861259000  | -0.175193000 | 1.283900000  |
| C | 3.674708000  | -0.415334000 | 0.176659000  |
| H | 3.636944000  | -0.867552000 | -1.936982000 |
| H | 3.324009000  | -0.012278000 | 2.254363000  |
| C | -0.706602000 | 2.244168000  | -0.099785000 |
| H | 0.291971000  | 2.197612000  | 0.355482000  |
| C | -0.506742000 | 2.419187000  | -1.608261000 |
| H | 0.010724000  | 3.361678000  | -1.811517000 |
| H | 0.092490000  | 1.612726000  | -2.042673000 |
| H | -1.466835000 | 2.452582000  | -2.134663000 |
| C | -1.419269000 | 3.463208000  | 0.489858000  |
| H | -1.629620000 | 3.323781000  | 1.555883000  |
| H | -0.800501000 | 4.358717000  | 0.380878000  |
| H | -2.369011000 | 3.656987000  | -0.018988000 |
| C | -3.489397000 | -2.958206000 | 0.304882000  |
| H | -4.534326000 | -3.013953000 | -0.014888000 |
| H | -2.972079000 | -3.848962000 | -0.064306000 |
| H | -3.471065000 | -2.987992000 | 1.400193000  |
| C | 0.707231000  | 0.161718000  | 2.464546000  |
| H | 0.374503000  | 1.205255000  | 2.493309000  |
| H | -0.176526000 | -0.466852000 | 2.586614000  |
| H | 1.354666000  | 0.001717000  | 3.329135000  |
| C | 5.176853000  | -0.410109000 | 0.298066000  |
| H | 5.492344000  | -0.705719000 | 1.301344000  |
| H | 5.634898000  | -1.090224000 | -0.423897000 |
| H | 5.577985000  | 0.590821000  | 0.107815000  |
| O | 1.187848000  | -0.870175000 | -2.411963000 |

H 0.256388000 -1.114979000 -2.377585000  
**SCF Done: E(RM062X) = -777.707675605**  
**# of imaginary frequencies = 0**

**(P)-2'a**

|   |              |              |              |
|---|--------------|--------------|--------------|
| C | 2.887716000  | 0.831953000  | 0.230557000  |
| C | 3.550386000  | -0.445596000 | -0.291431000 |
| C | 2.791022000  | -1.709051000 | 0.119925000  |
| C | 1.320244000  | -1.599726000 | -0.291482000 |
| C | 0.667535000  | -0.311587000 | 0.246650000  |
| C | 1.434119000  | 0.941493000  | -0.253663000 |
| H | 3.590941000  | -0.404486000 | -1.390170000 |
| H | 4.587104000  | -0.506050000 | 0.059062000  |
| H | 2.914098000  | 0.835229000  | 1.328791000  |
| H | 3.461574000  | 1.701172000  | -0.105335000 |
| H | 1.251929000  | -1.633589000 | -1.391029000 |
| H | 0.762870000  | -2.470293000 | 0.075194000  |
| H | 0.839269000  | -0.321403000 | 1.329124000  |
| H | 1.504127000  | 0.932686000  | -1.353189000 |
| H | 2.817630000  | -1.774588000 | 1.218459000  |
| C | -0.842803000 | -0.325207000 | 0.056140000  |
| C | -1.450245000 | -0.047105000 | -1.178154000 |
| C | -1.689803000 | -0.688381000 | 1.124326000  |
| C | -2.835850000 | -0.050080000 | -1.334850000 |
| C | -3.074936000 | -0.696441000 | 0.953222000  |
| C | -3.667451000 | -0.363712000 | -0.265984000 |
| H | -3.242542000 | 0.184047000  | -2.314440000 |
| H | -3.707584000 | -0.975988000 | 1.792059000  |
| C | 0.737126000  | 2.267652000  | 0.111947000  |
| H | -0.230830000 | 2.257365000  | -0.406677000 |
| C | 0.456666000  | 2.412520000  | 1.609153000  |
| H | 0.010811000  | 3.389930000  | 1.816866000  |
| H | -0.241648000 | 1.649445000  | 1.963845000  |
| H | 1.377969000  | 2.338786000  | 2.197168000  |
| C | 1.517963000  | 3.478848000  | -0.403858000 |
| H | 1.806163000  | 3.352556000  | -1.452870000 |
| H | 0.910183000  | 4.384887000  | -0.326072000 |
| H | 2.429463000  | 3.644437000  | 0.179359000  |
| C | 3.437947000  | -2.964346000 | -0.458339000 |
| H | 4.479218000  | -3.056097000 | -0.135090000 |
| H | 2.903273000  | -3.866450000 | -0.145993000 |
| H | 3.427991000  | -2.929047000 | -1.553599000 |
| C | -1.128788000 | -1.101160000 | 2.466716000  |
| H | -0.413341000 | -1.923854000 | 2.367967000  |
| H | -0.606101000 | -0.280045000 | 2.968764000  |
| H | -1.933170000 | -1.432820000 | 3.125674000  |
| C | -5.166605000 | -0.337074000 | -0.419534000 |
| H | -5.645655000 | -1.040265000 | 0.265722000  |
| H | -5.561811000 | 0.659836000  | -0.198252000 |
| H | -5.464823000 | -0.589553000 | -1.439801000 |
| O | -0.735593000 | 0.260158000  | -2.303590000 |
| H | 0.192178000  | 0.034883000  | -2.174861000 |

**SCF Done: E(RM062X) = -777.709208926**  
**# of imaginary frequencies = 0**

**TS1-2'a**

|   |              |             |              |
|---|--------------|-------------|--------------|
| C | 0.434442000  | 2.930328000 | -1.143835000 |
| C | 1.860123000  | 0.571085000 | 0.944496000  |
| C | 3.164585000  | 0.236952000 | 0.579076000  |
| C | -0.710611000 | 0.272892000 | 0.704061000  |

|   |              |              |              |
|---|--------------|--------------|--------------|
| C | 0.753527000  | -0.163117000 | 0.455714000  |
| C | -1.599101000 | 1.557148000  | -1.750533000 |
| C | 3.456175000  | -0.858238000 | -0.220862000 |
| C | 1.094551000  | -1.378672000 | -0.176038000 |
| C | 2.399213000  | -1.686316000 | -0.554433000 |
| O | 0.137922000  | -2.339751000 | -0.376147000 |
| C | -2.581383000 | 0.603520000  | -1.080914000 |
| C | -1.784470000 | -0.401407000 | -0.232310000 |
| C | -3.457927000 | -2.308499000 | -0.369689000 |
| C | -2.666558000 | -1.386231000 | 0.556906000  |
| C | -3.609247000 | -0.693225000 | 1.542943000  |
| H | 1.124329000  | 2.085918000  | -1.209207000 |
| H | 0.380557000  | 3.396120000  | -2.131352000 |
| H | 0.855102000  | 3.664051000  | -0.452644000 |
| H | 3.979201000  | 0.844444000  | 0.958984000  |
| H | -0.938675000 | -0.045283000 | 1.729425000  |
| H | -2.075718000 | 2.154182000  | -2.531443000 |
| H | -0.819521000 | 0.960056000  | -2.240286000 |
| H | -3.312555000 | 1.170972000  | -0.498137000 |
| H | -3.144229000 | 0.047890000  | -1.834046000 |
| H | -1.261859000 | -0.987673000 | -0.979049000 |
| H | -3.978469000 | -3.078621000 | 0.203989000  |
| H | -4.212214000 | -1.753347000 | -0.932595000 |
| H | -2.796001000 | -2.803762000 | -1.084067000 |
| H | -1.978072000 | -2.014464000 | 1.131755000  |
| H | -4.115908000 | -1.431184000 | 2.168583000  |
| H | -3.079541000 | -0.004772000 | 2.205547000  |
| H | -4.379445000 | -0.125673000 | 1.015106000  |
| C | 1.753878000  | 1.684749000  | 1.965383000  |
| H | 1.611133000  | 2.664919000  | 1.509259000  |
| H | 0.941344000  | 1.513953000  | 2.670510000  |
| H | 2.683208000  | 1.723936000  | 2.532931000  |
| C | 4.859738000  | -1.160419000 | -0.668636000 |
| H | 5.053725000  | -0.716079000 | -1.647817000 |
| H | 5.589837000  | -0.751940000 | 0.030137000  |
| H | 5.024019000  | -2.234702000 | -0.756187000 |
| H | 2.581588000  | -2.613988000 | -1.089261000 |
| C | -0.953480000 | 2.472737000  | -0.701071000 |
| H | -1.578213000 | 3.368387000  | -0.611630000 |
| C | -0.986402000 | 1.797087000  | 0.680751000  |
| H | -0.368773000 | 2.357037000  | 1.370835000  |
| H | -2.002630000 | 1.897013000  | 1.071322000  |
| H | 0.552079000  | -3.111642000 | -0.777539000 |

**SCF Done: E(RM062X) = -777.881463891**

**# of imaginary frequencies = 1 (-34.3513)**

**TS2-2'a**

|   |              |              |              |
|---|--------------|--------------|--------------|
| C | 1.787548000  | 0.513889000  | 1.002699000  |
| C | 3.124849000  | 0.288124000  | 0.708761000  |
| C | -0.724501000 | 0.220372000  | 0.689913000  |
| C | 0.732859000  | -0.240862000 | 0.441528000  |
| C | -1.352809000 | 1.399980000  | -1.835800000 |
| C | 3.502395000  | -0.772243000 | -0.100172000 |
| C | 1.144323000  | -1.415466000 | -0.229996000 |
| C | 2.498937000  | -1.631248000 | -0.513662000 |
| C | -2.455599000 | 0.542288000  | -1.225506000 |
| C | -1.827116000 | -0.435162000 | -0.213136000 |
| C | -3.801951000 | -2.026955000 | -0.258341000 |
| C | -2.864900000 | -1.204613000 | 0.626506000  |
| C | -3.678836000 | -0.316225000 | 1.569743000  |

|   |              |              |              |
|---|--------------|--------------|--------------|
| H | 3.875956000  | 0.943612000  | 1.140076000  |
| H | -0.943457000 | -0.063502000 | 1.726501000  |
| H | -1.701816000 | 1.948169000  | -2.713952000 |
| H | -0.545134000 | 0.738090000  | -2.174439000 |
| H | -3.214190000 | 1.187065000  | -0.771706000 |
| H | -2.961256000 | -0.038882000 | -1.999206000 |
| H | -1.357074000 | -1.163811000 | -0.857064000 |
| H | -4.428672000 | -2.683254000 | 0.348798000  |
| H | -4.464940000 | -1.378593000 | -0.835992000 |
| H | -3.239149000 | -2.646853000 | -0.961279000 |
| H | -2.299043000 | -1.906635000 | 1.251786000  |
| H | -4.355381000 | -0.928061000 | 2.170159000  |
| H | -3.044968000 | 0.246840000  | 2.257165000  |
| H | -4.289648000 | 0.396592000  | 1.010647000  |
| C | 4.943141000  | -0.996514000 | -0.469011000 |
| H | 5.237694000  | -0.334936000 | -1.287024000 |
| H | 5.602923000  | -0.787890000 | 0.374075000  |
| H | 5.108768000  | -2.023338000 | -0.794215000 |
| H | 2.770920000  | -2.530999000 | -1.055109000 |
| C | -0.807064000 | 2.369843000  | -0.780054000 |
| C | -0.959417000 | 1.752494000  | 0.620734000  |
| H | -0.354638000 | 2.298697000  | 1.333444000  |
| H | -1.997326000 | 1.889842000  | 0.934793000  |
| O | 1.485829000  | 1.495844000  | 1.906436000  |
| H | 2.304632000  | 1.902700000  | 2.210858000  |
| C | 0.256150000  | -2.593305000 | -0.598505000 |
| H | 0.864877000  | -3.496798000 | -0.576051000 |
| H | -0.562678000 | -2.734714000 | 0.104005000  |
| H | -0.162834000 | -2.516167000 | -1.603842000 |
| H | -1.442767000 | 3.262596000  | -0.790406000 |
| C | 0.613362000  | 2.820134000  | -1.114921000 |
| H | 0.998385000  | 3.512531000  | -0.362881000 |
| H | 1.293894000  | 1.968042000  | -1.171202000 |
| H | 0.632054000  | 3.325717000  | -2.084097000 |

**SCF Done: E(RM062X) = -777.882136789**

**# of imaginary frequencies = 1 (-45.5810)**

**(M)-2<sup>b</sup>**

|   |              |              |              |
|---|--------------|--------------|--------------|
| C | 3.017043000  | 0.666937000  | 0.436139000  |
| C | 3.651870000  | -0.497954000 | -0.325832000 |
| C | 2.808592000  | -1.771528000 | -0.237064000 |
| C | 1.379780000  | -1.487381000 | -0.708390000 |
| C | 0.748087000  | -0.307378000 | 0.053143000  |
| C | 1.603810000  | 0.972121000  | -0.082224000 |
| H | 3.757667000  | -0.221508000 | -1.385771000 |
| H | 4.662956000  | -0.693614000 | 0.050969000  |
| H | 2.973524000  | 0.415764000  | 1.505003000  |
| H | 3.652674000  | 1.554091000  | 0.343751000  |
| H | 1.397777000  | -1.283567000 | -1.788473000 |
| H | 0.757202000  | -2.379683000 | -0.567819000 |
| H | 0.806520000  | -0.582978000 | 1.111091000  |
| H | 1.719807000  | 1.213880000  | -1.146868000 |
| H | 2.756047000  | -2.064172000 | 0.822920000  |
| C | -0.735255000 | -0.165971000 | -0.262310000 |
| C | -1.663544000 | -0.662101000 | 0.683949000  |
| C | -1.253231000 | 0.378690000  | -1.447321000 |
| C | -3.037878000 | -0.601926000 | 0.469887000  |
| C | -2.639588000 | 0.428574000  | -1.650822000 |
| C | -3.540567000 | -0.050822000 | -0.710769000 |
| H | -3.732447000 | -0.984529000 | 1.209089000  |



|   |              |              |              |
|---|--------------|--------------|--------------|
| H | -3.016306000 | 0.855223000  | -2.577360000 |
| C | 0.945663000  | 2.196799000  | 0.585423000  |
| H | -0.023016000 | 2.338208000  | 0.086377000  |
| C | 0.658179000  | 1.994088000  | 2.075556000  |
| H | 0.164401000  | 2.879295000  | 2.488521000  |
| H | 0.007171000  | 1.132239000  | 2.252628000  |
| H | 1.585054000  | 1.842806000  | 2.640044000  |
| C | 1.761486000  | 3.472130000  | 0.365005000  |
| H | 2.026723000  | 3.597628000  | -0.690727000 |
| H | 1.191396000  | 4.352343000  | 0.677230000  |
| H | 2.689411000  | 3.460300000  | 0.946187000  |
| C | 3.437060000  | -2.916208000 | -1.026366000 |
| H | 4.444105000  | -3.142520000 | -0.662380000 |
| H | 2.835389000  | -3.827366000 | -0.952319000 |
| H | 3.515439000  | -2.651239000 | -2.087073000 |
| C | -0.380744000 | 0.958802000  | -2.537875000 |
| H | -0.001213000 | 1.948220000  | -2.258627000 |
| H | 0.482706000  | 0.331065000  | -2.765139000 |
| H | -0.960842000 | 1.077246000  | -3.455669000 |
| C | -5.028426000 | 0.003404000  | -0.945838000 |
| H | -5.260747000 | 0.510054000  | -1.884903000 |
| H | -5.455719000 | -1.003322000 | -0.989023000 |
| H | -5.535389000 | 0.536398000  | -0.135963000 |
| O | -1.130261000 | -1.203707000 | 1.820166000  |
| C | -2.016561000 | -1.653136000 | 2.825631000  |
| H | -1.390226000 | -2.008619000 | 3.643137000  |
| H | -2.657102000 | -0.839510000 | 3.183981000  |
| H | -2.645527000 | -2.475309000 | 2.466323000  |

**SCF Done: E(RM062X) = -816.989064783**

**# of imaginary frequencies = 0**

**(P)-2'b**

|   |              |              |              |
|---|--------------|--------------|--------------|
| C | -2.974811000 | 0.722957000  | -0.400900000 |
| C | -3.590957000 | -0.439441000 | 0.381985000  |
| C | -2.837498000 | -1.753700000 | 0.163101000  |
| C | -1.346576000 | -1.563367000 | 0.453115000  |
| C | -0.748558000 | -0.402479000 | -0.361495000 |
| C | -1.496263000 | 0.912365000  | -0.032787000 |
| H | -3.566649000 | -0.198962000 | 1.455355000  |
| H | -4.646229000 | -0.566927000 | 0.111866000  |
| H | -3.074313000 | 0.528753000  | -1.478375000 |
| H | -3.537099000 | 1.638925000  | -0.190504000 |
| H | -1.199794000 | -1.357944000 | 1.523047000  |
| H | -0.804142000 | -2.490839000 | 0.228284000  |
| H | -0.981065000 | -0.613095000 | -1.413142000 |
| H | -1.461324000 | 1.058301000  | 1.053289000  |
| H | -2.934696000 | -2.021526000 | -0.900900000 |
| C | 0.767302000  | -0.386300000 | -0.252273000 |
| C | 1.425879000  | 0.097984000  | 0.897021000  |
| C | 1.559319000  | -0.938378000 | -1.269945000 |
| C | 2.814877000  | 0.087822000  | 1.002158000  |
| C | 2.955141000  | -0.949575000 | -1.151230000 |
| C | 3.595545000  | -0.434278000 | -0.032411000 |
| H | 3.305914000  | 0.474345000  | 1.888208000  |
| H | 3.548699000  | -1.379647000 | -1.954295000 |
| C | -0.838291000 | 2.155760000  | -0.661388000 |
| H | 0.168382000  | 2.218532000  | -0.225900000 |
| C | -0.677339000 | 2.060415000  | -2.180021000 |
| H | -0.239536000 | 2.982049000  | -2.576227000 |
| H | -0.019015000 | 1.234150000  | -2.463599000 |

|   |              |              |              |
|---|--------------|--------------|--------------|
| H | -1.644563000 | 1.916231000  | -2.674404000 |
| C | -1.577824000 | 3.442050000  | -0.285857000 |
| H | -1.772801000 | 3.489055000  | 0.790874000  |
| H | -0.986499000 | 4.320177000  | -0.562527000 |
| H | -2.538444000 | 3.517844000  | -0.805932000 |
| C | -3.428931000 | -2.882018000 | 1.003049000  |
| H | -4.488663000 | -3.033163000 | 0.774791000  |
| H | -2.904804000 | -3.826367000 | 0.826353000  |
| H | -3.345848000 | -2.646429000 | 2.070228000  |
| C | 0.942257000  | -1.563865000 | -2.501072000 |
| H | 0.234543000  | -2.356317000 | -2.236925000 |
| H | 0.395161000  | -0.834659000 | -3.107781000 |
| H | 1.718434000  | -2.003373000 | -3.130505000 |
| C | 5.098714000  | -0.431178000 | 0.080793000  |
| H | 5.555635000  | -1.012779000 | -0.722747000 |
| H | 5.493870000  | 0.588196000  | 0.024634000  |
| H | 5.423583000  | -0.853037000 | 1.036276000  |
| O | 0.619677000  | 0.566324000  | 1.893252000  |
| C | 1.230133000  | 1.096118000  | 3.053107000  |
| H | 0.416196000  | 1.416489000  | 3.702679000  |
| H | 1.830851000  | 0.339209000  | 3.569744000  |
| H | 1.864094000  | 1.956870000  | 2.812406000  |

**SCF Done: E(RM062X) = -816.990531217**

**# of imaginary frequencies = 0**

### TS1-2'b

|   |              |              |              |
|---|--------------|--------------|--------------|
| C | -0.407176000 | -2.965151000 | -1.369028000 |
| C | -1.812005000 | -0.873697000 | 0.966371000  |
| C | -3.123813000 | -0.547817000 | 0.604603000  |
| C | 0.745787000  | -0.522957000 | 0.726363000  |
| C | -0.727293000 | -0.083911000 | 0.538235000  |
| C | 1.676317000  | -1.611106000 | -1.833387000 |
| C | -3.427617000 | 0.584077000  | -0.128159000 |
| C | -1.088019000 | 1.181441000  | 0.003273000  |
| C | -2.392378000 | 1.475833000  | -0.383300000 |
| O | -0.121344000 | 2.141373000  | -0.049783000 |
| C | 2.628761000  | -0.700143000 | -1.068403000 |
| C | 1.799362000  | 0.232847000  | -0.170996000 |
| C | 3.376366000  | 2.225810000  | -0.197228000 |
| C | 2.655888000  | 1.196198000  | 0.672090000  |
| C | 3.656165000  | 0.470728000  | 1.574335000  |
| H | -1.062169000 | -2.091569000 | -1.395498000 |
| H | -0.348702000 | -3.371062000 | -2.382415000 |
| H | -0.871896000 | -3.721995000 | -0.733003000 |
| H | -3.926432000 | -1.202024000 | 0.928752000  |
| H | 0.995306000  | -0.292605000 | 1.770242000  |
| H | 2.186459000  | -2.157885000 | -2.629759000 |
| H | 0.917620000  | -0.983770000 | -2.317524000 |
| H | 3.350959000  | -1.300322000 | -0.508230000 |
| H | 3.205138000  | -0.086276000 | -1.764230000 |
| H | 1.256619000  | 0.841874000  | -0.886661000 |
| H | 3.879262000  | 2.972115000  | 0.421975000  |
| H | 4.136803000  | 1.754326000  | -0.824382000 |
| H | 2.671319000  | 2.744121000  | -0.851607000 |
| H | 1.957233000  | 1.743008000  | 1.312613000  |
| H | 4.129084000  | 1.173474000  | 2.263649000  |
| H | 3.178216000  | -0.310093000 | 2.171181000  |
| H | 4.448891000  | 0.004256000  | 0.984653000  |
| C | -1.691500000 | -2.048989000 | 1.914961000  |
| H | -1.578127000 | -3.002795000 | 1.397853000  |

|   |              |              |              |
|---|--------------|--------------|--------------|
| H | -0.858932000 | -1.932366000 | 2.607136000  |
| H | -2.606558000 | -2.108864000 | 2.504169000  |
| C | -4.829176000 | 0.880294000  | -0.587695000 |
| H | -5.557613000 | 0.296027000  | -0.025761000 |
| H | -5.067769000 | 1.938282000  | -0.471157000 |
| H | -4.947005000 | 0.632993000  | -1.645458000 |
| H | -2.620900000 | 2.421650000  | -0.853799000 |
| C | 0.987210000  | -2.590713000 | -0.870734000 |
| H | 1.581515000  | -3.510770000 | -0.847626000 |
| C | 1.018018000  | -2.039293000 | 0.564969000  |
| H | 0.392685000  | -2.656989000 | 1.195876000  |
| H | 2.031020000  | -2.182438000 | 0.950370000  |
| C | -0.442903000 | 3.408887000  | -0.589713000 |
| H | -0.750981000 | 3.329979000  | -1.634900000 |
| H | -1.231281000 | 3.897438000  | -0.012803000 |
| H | 0.469013000  | 3.997258000  | -0.524731000 |

**SCF Done: E(RM062X) = -817.168113380**

**# of imaginary frequencies = 1 (-44.0785)**

### TS2-2'b

|   |              |              |              |
|---|--------------|--------------|--------------|
| C | 2.012622000  | 1.334596000  | 1.754463000  |
| C | 1.073220000  | 1.637630000  | -0.585809000 |
| C | 1.904532000  | -0.580522000 | 0.098651000  |
| C | 1.753211000  | -0.158888000 | 1.567983000  |
| C | 0.792568000  | 0.114970000  | -0.744696000 |
| C | 1.096072000  | 2.180418000  | 0.858033000  |
| H | -0.950067000 | 2.927413000  | 0.864088000  |
| H | -0.765506000 | 1.375656000  | 1.683203000  |
| H | -3.873865000 | 0.780906000  | -0.266924000 |
| H | 0.967643000  | -0.120811000 | -1.799638000 |
| H | 3.059234000  | 1.549589000  | 1.519686000  |
| H | 1.865894000  | 1.617578000  | 2.800777000  |
| H | 0.735861000  | -0.401905000 | 1.892397000  |
| H | 3.049299000  | -1.779896000 | -2.073485000 |
| H | -0.189654000 | 2.852066000  | 2.457914000  |
| C | -0.645037000 | -0.392237000 | -0.444391000 |
| C | -3.289326000 | -1.179683000 | 0.339617000  |
| C | -3.049466000 | 0.087845000  | -0.177197000 |
| C | -1.777113000 | 0.450813000  | -0.603161000 |
| H | 2.420831000  | -0.742221000 | 2.204562000  |
| C | 3.337760000  | -0.363903000 | -0.451202000 |
| H | 1.787946000  | -1.653876000 | 0.056572000  |
| C | 4.346179000  | -1.169210000 | 0.373139000  |
| H | 2.900348000  | -0.092888000 | -2.581729000 |
| H | 4.488663000  | -0.769146000 | -2.242737000 |
| H | 3.628605000  | 0.685444000  | -0.374811000 |
| C | -0.285890000 | 2.338439000  | 1.498276000  |
| H | 4.066811000  | -2.227216000 | 0.397573000  |
| H | 5.342468000  | -1.096068000 | -0.067010000 |
| H | 4.413657000  | -0.813934000 | 1.401859000  |
| C | 3.444874000  | -0.770279000 | -1.922772000 |
| H | 1.526429000  | 3.185723000  | 0.795125000  |
| H | 0.407162000  | 2.241243000  | -1.188522000 |
| H | 2.071214000  | 1.792843000  | -1.003181000 |
| C | -0.948079000 | -1.722596000 | -0.087751000 |
| C | -2.240602000 | -2.076731000 | 0.324262000  |
| O | -1.584252000 | 1.637513000  | -1.240703000 |
| C | -2.659082000 | 2.551685000  | -1.332169000 |
| H | -2.255267000 | 3.436368000  | -1.818790000 |
| H | -3.475744000 | 2.146955000  | -1.934122000 |

|   |              |              |              |
|---|--------------|--------------|--------------|
| H | -3.035762000 | 2.821510000  | -0.342307000 |
| C | -0.002031000 | -2.903950000 | -0.198929000 |
| H | -0.595968000 | -3.806102000 | -0.342335000 |
| H | 0.669089000  | -2.813974000 | -1.052049000 |
| H | 0.599180000  | -3.054154000 | 0.699815000  |
| C | -4.654273000 | -1.558656000 | 0.845786000  |
| H | -4.834184000 | -1.122143000 | 1.831073000  |
| H | -5.436967000 | -1.192886000 | 0.179593000  |
| H | -4.752905000 | -2.640189000 | 0.935707000  |
| H | -2.421270000 | -3.104433000 | 0.620526000  |

**SCF Done: E(RM062X) = -817.172027096**

**# of imaginary frequencies = 1 (-51.3152)**

**(M)-2'c**

|   |              |              |              |
|---|--------------|--------------|--------------|
| C | -1.765007000 | 1.570090000  | -0.538700000 |
| C | -2.490173000 | 0.578709000  | 0.123080000  |
| C | -3.660179000 | 2.992146000  | -0.844618000 |
| C | -2.305797000 | 2.745789000  | -1.020834000 |
| H | -1.662572000 | 3.453605000  | -1.529883000 |
| C | -3.864555000 | 0.832735000  | 0.291049000  |
| C | -4.411500000 | 2.021780000  | -0.189856000 |
| O | -0.402551000 | 1.352070000  | -0.807326000 |
| C | -1.349792000 | -3.111677000 | 0.637111000  |
| C | -2.339117000 | -2.022158000 | 0.201848000  |
| C | -1.762405000 | -0.655152000 | 0.631490000  |
| C | -1.539556000 | -0.607462000 | 2.153805000  |
| C | -0.576847000 | -1.706138000 | 2.604638000  |
| C | -1.091011000 | -3.069200000 | 2.143256000  |
| H | -0.399605000 | -2.980179000 | 0.107005000  |
| H | -1.734353000 | -4.096060000 | 0.363077000  |
| H | -3.262213000 | -2.206083000 | 0.760715000  |
| H | -0.762933000 | -0.629838000 | 0.188160000  |
| H | -2.025623000 | -3.286702000 | 2.675730000  |
| H | -0.377864000 | -3.849042000 | 2.424733000  |
| H | -1.146290000 | 0.372561000  | 2.435612000  |
| C | -2.701833000 | -2.073528000 | -1.294978000 |
| H | -3.454169000 | -1.294402000 | -1.461658000 |
| C | -0.365466000 | -1.669228000 | 4.113631000  |
| H | 0.341043000  | -2.439142000 | 4.430822000  |
| H | 0.020256000  | -0.699328000 | 4.434809000  |
| H | -1.310968000 | -1.845032000 | 4.634270000  |
| C | -1.522660000 | -1.765416000 | -2.220187000 |
| H | -1.840528000 | -1.820647000 | -3.263354000 |
| H | -0.711770000 | -2.485610000 | -2.085055000 |
| H | -1.123907000 | -0.763392000 | -2.050409000 |
| C | -3.342259000 | -3.408518000 | -1.675946000 |
| H | -2.607468000 | -4.216532000 | -1.677848000 |
| H | -3.771243000 | -3.352795000 | -2.678207000 |
| H | -4.140301000 | -3.678144000 | -0.979415000 |
| H | -2.490728000 | -0.734514000 | 2.681691000  |
| H | 0.388501000  | -1.524551000 | 2.112329000  |
| C | 0.470113000  | 1.606211000  | 0.177238000  |
| O | 0.204981000  | 2.179268000  | 1.196499000  |
| C | 4.369491000  | 0.000288000  | -0.599343000 |
| C | 4.111471000  | 0.821195000  | 0.482210000  |
| C | 2.863281000  | 1.353844000  | 0.738762000  |
| C | 1.824721000  | 1.058990000  | -0.135202000 |
| C | 2.038159000  | 0.238404000  | -1.235521000 |
| C | 3.307078000  | -0.272469000 | -1.437852000 |
| H | 5.352235000  | -0.410083000 | -0.777604000 |

|   |              |              |              |
|---|--------------|--------------|--------------|
| H | 2.692702000  | 1.983839000  | 1.600547000  |
| H | 1.237181000  | -0.005571000 | -1.918472000 |
| N | 5.218974000  | 1.131339000  | 1.403695000  |
| O | 4.975980000  | 1.849208000  | 2.349142000  |
| O | 6.303578000  | 0.648997000  | 1.158765000  |
| N | 3.537027000  | -1.154990000 | -2.595430000 |
| O | 4.661695000  | -1.572503000 | -2.767388000 |
| O | 2.586204000  | -1.409621000 | -3.302550000 |
| C | -4.804728000 | -0.152397000 | 0.941673000  |
| H | -5.034615000 | -0.977460000 | 0.262726000  |
| H | -4.394542000 | -0.582600000 | 1.852986000  |
| H | -5.743334000 | 0.340126000  | 1.192076000  |
| C | -4.284793000 | 4.275002000  | -1.321261000 |
| H | -5.338032000 | 4.131646000  | -1.561480000 |
| H | -4.222198000 | 5.042585000  | -0.546463000 |
| H | -3.773837000 | 4.655268000  | -2.205684000 |
| H | -5.473751000 | 2.193230000  | -0.049693000 |

**SCF Done: E(RM062X) = -1531.27128360**

**# of imaginary frequencies = 0**

**(P)-2'c**

|   |              |              |              |
|---|--------------|--------------|--------------|
| C | 2.002863000  | -1.091576000 | -0.870897000 |
| C | 2.810394000  | -0.157216000 | -0.230112000 |
| C | 3.842808000  | -2.498450000 | -1.467617000 |
| C | 2.480235000  | -2.238257000 | -1.478367000 |
| H | 1.784014000  | -2.914790000 | -1.958334000 |
| C | 4.194764000  | -0.408049000 | -0.257151000 |
| C | 4.678174000  | -1.564805000 | -0.861703000 |
| O | 0.634359000  | -0.803830000 | -0.971485000 |
| C | 0.765890000  | 2.295278000  | 2.009240000  |
| C | 1.068674000  | 0.933824000  | 1.373473000  |
| C | 2.256105000  | 1.108664000  | 0.398730000  |
| C | 1.904933000  | 2.140300000  | -0.687694000 |
| C | 1.505000000  | 3.493399000  | -0.098820000 |
| C | 0.394498000  | 3.318918000  | 0.936588000  |
| H | 1.640122000  | 2.652414000  | 2.564397000  |
| H | -0.052617000 | 2.201559000  | 2.726132000  |
| H | 0.179693000  | 0.686952000  | 0.786904000  |
| H | 3.064323000  | 1.545328000  | 0.990965000  |
| H | -0.516409000 | 2.986341000  | 0.420243000  |
| H | 0.162495000  | 4.284692000  | 1.393667000  |
| H | 2.759110000  | 2.268617000  | -1.359914000 |
| C | 1.264656000  | -0.211685000 | 2.383081000  |
| H | 1.487120000  | -1.112328000 | 1.801537000  |
| C | 1.088861000  | 4.464777000  | -1.197675000 |
| H | 1.886092000  | 4.598713000  | -1.931686000 |
| H | 0.839159000  | 5.443675000  | -0.783370000 |
| H | 0.206434000  | 4.085777000  | -1.720988000 |
| C | 2.437820000  | 0.014758000  | 3.335487000  |
| H | 2.553165000  | -0.841608000 | 4.002602000  |
| H | 3.378034000  | 0.141158000  | 2.795675000  |
| H | 2.278387000  | 0.899492000  | 3.956224000  |
| C | -0.016830000 | -0.495569000 | 3.167176000  |
| H | -0.244662000 | 0.309450000  | 3.869088000  |
| H | 0.085697000  | -1.416547000 | 3.744120000  |
| H | -0.874598000 | -0.611355000 | 2.498512000  |
| H | 1.081306000  | 1.751833000  | -1.299176000 |
| H | 2.383123000  | 3.901785000  | 0.417888000  |
| C | -0.249254000 | -1.610488000 | -0.365605000 |
| O | 0.016232000  | -2.637174000 | 0.191723000  |

|   |              |              |              |
|---|--------------|--------------|--------------|
| C | -4.230721000 | -0.016025000 | -0.438718000 |
| C | -3.948421000 | -1.274329000 | 0.057046000  |
| C | -2.673730000 | -1.805525000 | 0.074774000  |
| C | -1.631675000 | -1.045478000 | -0.439902000 |
| C | -1.871801000 | 0.222795000  | -0.953636000 |
| C | -3.164659000 | 0.708706000  | -0.932790000 |
| H | -5.233861000 | 0.382770000  | -0.433365000 |
| H | -2.485659000 | -2.787877000 | 0.484593000  |
| H | -1.072646000 | 0.828520000  | -1.355314000 |
| N | -5.059414000 | -2.076534000 | 0.600255000  |
| O | -4.794382000 | -3.175936000 | 1.032784000  |
| O | -6.165981000 | -1.584855000 | 0.578940000  |
| N | -3.414600000 | 2.065327000  | -1.450489000 |
| O | -2.452456000 | 2.716567000  | -1.797880000 |
| O | -4.562833000 | 2.445109000  | -1.493168000 |
| H | 5.749102000  | -1.738370000 | -0.871010000 |
| C | 5.183240000  | 0.572727000  | 0.325114000  |
| H | 5.058208000  | 1.566921000  | -0.108711000 |
| H | 5.070645000  | 0.675132000  | 1.406216000  |
| H | 6.201303000  | 0.242592000  | 0.125906000  |
| C | 4.396696000  | -3.754144000 | -2.084460000 |
| H | 5.398424000  | -3.586551000 | -2.479686000 |
| H | 4.463700000  | -4.550231000 | -1.339405000 |
| H | 3.758260000  | -4.109962000 | -2.892753000 |

**SCF Done: E(RM062X) = -1531.25463795**

**# of imaginary frequencies = 0**

#### TS1-2'c

|   |              |              |              |
|---|--------------|--------------|--------------|
| C | -2.995736000 | 3.361105000  | -0.054681000 |
| C | -2.896426000 | 1.454943000  | -1.704493000 |
| C | -1.012841000 | 1.780167000  | -0.100915000 |
| C | -1.993497000 | 2.570847000  | 0.777433000  |
| C | -1.803803000 | 0.686647000  | -0.906658000 |
| C | -3.823428000 | 2.422219000  | -0.938443000 |
| H | -5.565153000 | 1.124744000  | -0.755684000 |
| H | -4.569200000 | 1.163166000  | 0.695521000  |
| H | -0.845099000 | -2.113744000 | 2.686695000  |
| H | -1.134133000 | 0.262159000  | -1.660660000 |
| H | -2.460909000 | 4.080637000  | -0.682118000 |
| H | -3.659744000 | 3.940577000  | 0.592248000  |
| H | -2.524419000 | 1.863980000  | 1.424014000  |
| H | 1.737904000  | 1.614605000  | -0.868607000 |
| H | -5.586309000 | 2.547272000  | 0.291111000  |
| C | -2.205771000 | -0.500901000 | 0.000106000  |
| C | -2.912334000 | -2.265610000 | 2.148892000  |
| C | -1.629572000 | -1.847430000 | 1.990467000  |
| C | -1.299632000 | -1.012101000 | 0.905746000  |
| H | -1.441097000 | 3.232610000  | 1.446093000  |
| C | -0.137973000 | 2.681190000  | -1.007623000 |
| H | -0.307693000 | 1.309166000  | 0.578218000  |
| C | 0.454895000  | 3.853057000  | -0.220130000 |
| H | 0.694286000  | 0.993819000  | -2.157987000 |
| H | 1.545742000  | 2.520022000  | -2.364237000 |
| H | -0.740902000 | 3.102144000  | -1.814986000 |
| C | -4.946274000 | 1.768620000  | -0.130567000 |
| H | 0.978281000  | 3.487660000  | 0.669284000  |
| H | 1.178417000  | 4.391318000  | -0.835412000 |
| H | -0.303739000 | 4.566265000  | 0.102622000  |
| C | 1.016290000  | 1.898808000  | -1.639403000 |
| H | -4.311239000 | 3.028068000  | -1.709031000 |

|   |              |              |              |
|---|--------------|--------------|--------------|
| H | -3.490705000 | 0.809880000  | -2.339651000 |
| H | -2.334568000 | 2.068891000  | -2.411898000 |
| O | 0.070583000  | -0.712262000 | 0.861589000  |
| C | 0.789598000  | -1.204554000 | -0.157219000 |
| O | 0.341268000  | -1.804299000 | -1.093426000 |
| C | 2.244172000  | -0.906747000 | 0.012491000  |
| C | 2.726131000  | -0.226946000 | 1.124055000  |
| C | 3.106143000  | -1.306395000 | -1.000224000 |
| C | 4.080471000  | 0.042859000  | 1.192026000  |
| H | 2.065980000  | 0.094479000  | 1.916625000  |
| C | 4.449684000  | -1.010322000 | -0.877478000 |
| H | 2.728033000  | -1.830718000 | -1.866679000 |
| C | 4.972779000  | -0.333202000 | 0.207436000  |
| H | 6.026341000  | -0.108688000 | 0.281502000  |
| H | -3.205698000 | -2.865680000 | 3.001226000  |
| C | -3.479061000 | -1.190778000 | 0.008018000  |
| C | -3.851596000 | -1.995222000 | 1.126316000  |
| C | -5.131764000 | -2.602253000 | 1.176557000  |
| C | -5.987679000 | -2.533081000 | 0.114868000  |
| C | -5.565667000 | -1.877510000 | -1.058565000 |
| C | -4.363345000 | -1.224859000 | -1.104459000 |
| H | -5.396546000 | -3.162861000 | 2.065626000  |
| H | -6.955245000 | -3.016850000 | 0.152838000  |
| H | -6.192910000 | -1.896563000 | -1.941077000 |
| H | -4.065379000 | -0.786829000 | -2.039129000 |
| N | 4.598740000  | 0.771484000  | 2.363642000  |
| O | 5.790005000  | 0.990270000  | 2.405699000  |
| O | 3.800952000  | 1.107651000  | 3.211652000  |
| N | 5.369853000  | -1.427470000 | -1.950574000 |
| O | 6.544042000  | -1.157869000 | -1.818134000 |
| O | 4.894772000  | -2.013856000 | -2.898536000 |

**SCF Done: E(RM062X) = -1606.24378457**

**# of imaginary frequencies = 1 (-38.7279)**

### TS2-2'c

|   |              |              |              |
|---|--------------|--------------|--------------|
| C | -2.750855000 | -1.556969000 | 2.598872000  |
| C | -1.041305000 | -1.286077000 | 0.746445000  |
| C | -3.425777000 | -1.528107000 | 0.157487000  |
| C | -3.789570000 | -1.089480000 | 1.583500000  |
| C | -2.110327000 | -0.813200000 | -0.280073000 |
| C | -1.351661000 | -1.038660000 | 2.238456000  |
| H | -0.198193000 | 0.801134000  | 2.451889000  |
| H | -1.929029000 | 1.074193000  | 2.259083000  |
| H | -0.529968000 | 3.618807000  | -0.078480000 |
| H | -1.806163000 | -1.212215000 | -1.253118000 |
| H | -2.744275000 | -2.650232000 | 2.632560000  |
| H | -3.019270000 | -1.216965000 | 3.602661000  |
| H | -3.860430000 | 0.003228000  | 1.600386000  |
| H | -3.681240000 | -2.954745000 | -2.165415000 |
| H | -1.300722000 | 0.460421000  | 3.787226000  |
| C | -2.274753000 | 0.707904000  | -0.510000000 |
| C | -2.601994000 | 3.564666000  | -0.684011000 |
| C | -1.390210000 | 3.004752000  | -0.316216000 |
| C | -1.247445000 | 1.630840000  | -0.272040000 |
| H | -4.779737000 | -1.459290000 | 1.853521000  |
| C | -3.382661000 | -3.067482000 | -0.016234000 |
| H | -4.241235000 | -1.226345000 | -0.484799000 |
| C | -4.734471000 | -3.679696000 | 0.360697000  |
| H | -1.994602000 | -3.223921000 | -1.706918000 |
| H | -3.155301000 | -4.539078000 | -1.589727000 |

|   |              |              |              |
|---|--------------|--------------|--------------|
| H | -2.635611000 | -3.510580000 | 0.645195000  |
| C | -1.184758000 | 0.410740000  | 2.702439000  |
| H | -5.541905000 | -3.213395000 | -0.212219000 |
| H | -4.741593000 | -4.748671000 | 0.140929000  |
| H | -4.958923000 | -3.559763000 | 1.420844000  |
| C | -3.027057000 | -3.464122000 | -1.450950000 |
| H | -0.618970000 | -1.630950000 | 2.796113000  |
| H | -0.041349000 | -0.927776000 | 0.532571000  |
| H | -0.974648000 | -2.367630000 | 0.609454000  |
| O | 0.065663000  | 1.230297000  | 0.024984000  |
| C | 0.768565000  | 0.680687000  | -0.975281000 |
| O | 0.342327000  | 0.448739000  | -2.070733000 |
| C | 2.166752000  | 0.364411000  | -0.552168000 |
| C | 2.629149000  | 0.656051000  | 0.724556000  |
| C | 2.998892000  | -0.246354000 | -1.481576000 |
| C | 3.932042000  | 0.322727000  | 1.043821000  |
| H | 1.996454000  | 1.135071000  | 1.456973000  |
| C | 4.291475000  | -0.554570000 | -1.107580000 |
| H | 2.636633000  | -0.473647000 | -2.474047000 |
| C | 4.792283000  | -0.284100000 | 0.151171000  |
| H | 5.806260000  | -0.535246000 | 0.423110000  |
| C | -3.439559000 | 1.294351000  | -1.066107000 |
| C | -3.585596000 | 2.682156000  | -1.101768000 |
| N | 4.428094000  | 0.625846000  | 2.398144000  |
| O | 5.572669000  | 0.324640000  | 2.654658000  |
| O | 3.659002000  | 1.156203000  | 3.168894000  |
| N | 5.180240000  | -1.201260000 | -2.089559000 |
| O | 6.307128000  | -1.466605000 | -1.733721000 |
| O | 4.727021000  | -1.425687000 | -3.189750000 |
| C | -2.816272000 | 5.052351000  | -0.682312000 |
| H | -3.562118000 | 5.341435000  | -1.422420000 |
| H | -3.171277000 | 5.386783000  | 0.295195000  |
| H | -1.888533000 | 5.583320000  | -0.895534000 |
| C | -4.543422000 | 0.533946000  | -1.775563000 |
| H | -4.169459000 | -0.360944000 | -2.270659000 |
| H | -5.359409000 | 0.246864000  | -1.110146000 |
| H | -4.966102000 | 1.181860000  | -2.542630000 |
| H | -4.506881000 | 3.084881000  | -1.509769000 |

**SCF Done: E(RM062X) = -1531.22058429**

**# of imaginary frequencies = 1 (-35.9157)**

**(M)-3'b**

|   |              |              |              |
|---|--------------|--------------|--------------|
| C | 1.351617000  | -0.921179000 | 0.360253000  |
| C | 0.897026000  | 0.120850000  | -0.470601000 |
| C | 3.650582000  | -0.294101000 | -0.008727000 |
| C | 2.705589000  | -1.125969000 | 0.591635000  |
| H | 3.043118000  | -1.928260000 | 1.234003000  |
| C | 1.848954000  | 0.941714000  | -1.077473000 |
| C | 3.210138000  | 0.725384000  | -0.836882000 |
| C | -2.792112000 | 0.681655000  | 0.536286000  |
| C | -1.275546000 | 0.872573000  | 0.605945000  |
| C | -0.593887000 | 0.317560000  | -0.670103000 |
| C | -1.239734000 | -0.959988000 | -1.190205000 |
| C | -2.473047000 | -1.522119000 | -0.637116000 |
| C | -3.155317000 | -0.798578000 | 0.497392000  |
| H | -3.190909000 | 1.174115000  | -0.354032000 |
| H | -3.268563000 | 1.147568000  | 1.401685000  |
| H | -0.913555000 | 0.270497000  | 1.445625000  |
| H | -0.735129000 | 1.050897000  | -1.467938000 |



|   |              |              |              |
|---|--------------|--------------|--------------|
| H | -0.560093000 | -1.648691000 | -1.686818000 |
| H | -2.855707000 | -1.282731000 | 1.432703000  |
| H | -4.237326000 | -0.931839000 | 0.399825000  |
| C | -0.860109000 | 2.332158000  | 0.878605000  |
| H | 0.216306000  | 2.398261000  | 0.685037000  |
| C | -2.745352000 | -2.995858000 | -0.746920000 |
| H | -3.817320000 | -3.178355000 | -0.853214000 |
| H | -2.229252000 | -3.418381000 | -1.609050000 |
| H | -2.402027000 | -3.508215000 | 0.153997000  |
| C | -1.570818000 | 3.340778000  | -0.026575000 |
| H | -1.116972000 | 4.328521000  | 0.076777000  |
| H | -1.524742000 | 3.060856000  | -1.081537000 |
| H | -2.625019000 | 3.430228000  | 0.246855000  |
| C | -1.072906000 | 2.706699000  | 2.345739000  |
| H | -0.738742000 | 3.729029000  | 2.534832000  |
| H | -2.129297000 | 2.650400000  | 2.619609000  |
| H | -0.515554000 | 2.039543000  | 3.006484000  |
| O | 0.380731000  | -1.705238000 | 0.905626000  |
| O | -2.485132000 | -0.807196000 | -1.883907000 |
| C | 0.778846000  | -2.774409000 | 1.744506000  |
| H | 1.322350000  | -2.407587000 | 2.618044000  |
| H | -0.138586000 | -3.260595000 | 2.065928000  |
| H | 1.400528000  | -3.489819000 | 1.201626000  |
| C | 5.117130000  | -0.518325000 | 0.248424000  |
| H | 5.725995000  | 0.196573000  | -0.303764000 |
| H | 5.345686000  | -0.413561000 | 1.310903000  |
| H | 5.415109000  | -1.525261000 | -0.050067000 |
| C | 1.449695000  | 2.065725000  | -2.002728000 |
| H | 0.817647000  | 2.799670000  | -1.498618000 |
| H | 2.334410000  | 2.581718000  | -2.372759000 |
| H | 0.891111000  | 1.694349000  | -2.864508000 |
| H | 3.937257000  | 1.373138000  | -1.314126000 |

**SCF Done: E(RM062X) = -891.198181981**

**# of imaginary frequencies = 0**

**(P)-3'b**

|   |              |              |              |
|---|--------------|--------------|--------------|
| C | 1.872657000  | 0.324361000  | -0.672127000 |
| C | 0.771600000  | -0.410676000 | -0.188154000 |
| C | 3.427638000  | -1.192756000 | 0.376047000  |
| C | 3.178404000  | -0.057933000 | -0.395950000 |
| H | 4.014728000  | 0.516540000  | -0.770828000 |
| C | 1.029072000  | -1.545435000 | 0.585344000  |
| C | 2.351028000  | -1.918167000 | 0.855664000  |
| C | -2.764738000 | 0.982505000  | 0.524302000  |
| C | -1.251541000 | 0.838853000  | 0.703073000  |
| C | -0.631550000 | 0.080520000  | -0.498721000 |
| C | -1.509850000 | -1.041473000 | -1.029841000 |
| C | -2.874266000 | -1.294243000 | -0.549229000 |
| C | -3.447895000 | -0.381444000 | 0.508097000  |
| H | -2.980558000 | 1.504344000  | -0.411077000 |
| H | -3.183652000 | 1.584181000  | 1.333325000  |
| H | -1.088545000 | 0.225329000  | 1.597369000  |
| H | -0.553995000 | 0.788035000  | -1.326137000 |
| H | -0.972677000 | -1.878515000 | -1.469583000 |
| H | -3.334420000 | -0.870817000 | 1.481475000  |
| H | -4.522664000 | -0.275844000 | 0.330988000  |
| C | -0.536096000 | 2.180573000  | 0.963175000  |
| H | 0.539102000  | 1.984922000  | 0.902202000  |
| C | -3.463828000 | -2.673868000 | -0.634625000 |
| H | -4.538599000 | -2.616679000 | -0.821737000 |

|   |               |              |              |
|---|---------------|--------------|--------------|
| H | -2.995968000  | -3.242188000 | -1.438684000 |
| H | -3.311971000  | -3.206119000 | 0.306732000  |
| C | -0.872537000  | 3.257203000  | -0.069038000 |
| H | -0.240876000  | 4.134594000  | 0.086018000  |
| H | -0.7111402000 | 2.910100000  | -1.090864000 |
| H | -1.912851000  | 3.578448000  | 0.026045000  |
| C | -0.821245000  | 2.697487000  | 2.374034000  |
| H | -1.877900000  | 2.943258000  | 2.503649000  |
| H | -0.550697000  | 1.955782000  | 3.128711000  |
| H | -0.247899000  | 3.605631000  | 2.571518000  |
| O | 1.572714000   | 1.426486000  | -1.414782000 |
| O | -2.644656000  | -0.648059000 | -1.809267000 |
| C | 2.636749000   | 2.267138000  | -1.821355000 |
| H | 2.175602000   | 3.103130000  | -2.340806000 |
| H | 3.195453000   | 2.635970000  | -0.957961000 |
| H | 3.315851000   | 1.746859000  | -2.500349000 |
| H | 2.531733000   | -2.798674000 | 1.462922000  |
| C | -0.068728000  | -2.423698000 | 1.142105000  |
| H | -0.954390000  | -1.862460000 | 1.434337000  |
| H | -0.385782000  | -3.167313000 | 0.406501000  |
| H | 0.295066000   | -2.963202000 | 2.016081000  |
| C | 4.846127000   | -1.599412000 | 0.674830000  |
| H | 5.396301000   | -1.796724000 | -0.247304000 |
| H | 5.374957000   | -0.804761000 | 1.204749000  |
| H | 4.875590000   | -2.498442000 | 1.289320000  |

**SCF Done: E(RM062X) = -891.196942131**

**# of imaginary frequencies = 0**

### TS1-3'b

|   |              |              |              |
|---|--------------|--------------|--------------|
| C | 0.789091000  | 3.537438000  | 1.028768000  |
| C | 1.178236000  | 1.565014000  | -0.610882000 |
| C | 1.103119000  | 2.095490000  | 0.754607000  |
| C | 0.748656000  | 0.111021000  | -0.820996000 |
| C | -0.789738000 | -0.026087000 | -0.633167000 |
| C | 0.737765000  | 1.089185000  | 1.825140000  |
| C | -3.547483000 | -0.168002000 | 0.108503000  |
| C | -1.394014000 | -1.229209000 | -0.185018000 |
| C | -2.722361000 | -1.279438000 | 0.226233000  |
| O | -0.646970000 | -2.367476000 | -0.223218000 |
| C | 1.441591000  | -0.264447000 | 1.624321000  |
| C | 1.598061000  | -0.750471000 | 0.153373000  |
| C | 3.325627000  | -1.010330000 | -1.744500000 |
| C | 3.092204000  | -0.901099000 | -0.238587000 |
| C | 3.650433000  | -2.150753000 | 0.448780000  |
| O | 2.368999000  | 1.835460000  | 0.143068000  |
| H | 1.350770000  | 3.888466000  | 1.897455000  |
| H | -0.274977000 | 3.655178000  | 1.246499000  |
| H | 1.088084000  | 2.252055000  | -1.438687000 |
| H | 1.043889000  | 4.159068000  | 0.169542000  |
| H | 0.981743000  | -0.189556000 | -1.845636000 |
| H | 1.001530000  | 1.494078000  | 2.806372000  |
| H | 2.438072000  | -0.189933000 | 2.064880000  |
| H | -0.349708000 | 0.972238000  | 1.816991000  |
| H | 2.704484000  | -1.798946000 | -2.181261000 |
| H | 3.104260000  | -0.076263000 | -2.264238000 |
| H | 1.214482000  | -1.759066000 | 0.098757000  |
| H | 0.903173000  | -1.015048000 | 2.208143000  |
| H | 3.182000000  | -3.050466000 | 0.037896000  |
| H | 4.369557000  | -1.260821000 | -1.945555000 |
| H | 3.644698000  | -0.036211000 | 0.127264000  |

|   |              |              |              |
|---|--------------|--------------|--------------|
| H | 3.463595000  | -2.139291000 | 1.524692000  |
| H | 4.728581000  | -2.233059000 | 0.295979000  |
| H | -3.136158000 | -2.198066000 | 0.617308000  |
| C | -1.682289000 | 1.029401000  | -0.903115000 |
| C | -3.023042000 | 0.950818000  | -0.510173000 |
| C | -1.183773000 | -3.563161000 | 0.312288000  |
| H | -0.394843000 | -4.305877000 | 0.224564000  |
| H | -1.452299000 | -3.439507000 | 1.363690000  |
| H | -2.057641000 | -3.893666000 | -0.253093000 |
| H | -3.671375000 | 1.795882000  | -0.714950000 |
| C | -1.330461000 | 2.267377000  | -1.704276000 |
| H | -0.894495000 | 3.061588000  | -1.098197000 |
| H | -0.642610000 | 2.038666000  | -2.517534000 |
| H | -2.242671000 | 2.661833000  | -2.150274000 |
| C | -4.969929000 | -0.212856000 | 0.595862000  |
| H | -5.446781000 | -1.158127000 | 0.333200000  |
| H | -5.005877000 | -0.119852000 | 1.683816000  |
| H | -5.555882000 | 0.601488000  | 0.170615000  |

**SCF Done: E(RM062X) = -891.163023834**

**# of imaginary frequencies = 1 (-37.6208)**

### TS2-3'b

|   |              |              |              |
|---|--------------|--------------|--------------|
| C | 0.149933000  | 3.127427000  | 1.458722000  |
| C | 0.892724000  | 1.483456000  | -0.393929000 |
| C | 0.777040000  | 1.835935000  | 1.021981000  |
| C | -1.752847000 | 0.376869000  | -0.723212000 |
| C | -3.052027000 | 0.094639000  | -0.323939000 |
| C | 0.778517000  | -0.005330000 | -0.748378000 |
| C | -0.671788000 | -0.515002000 | -0.508961000 |
| C | 0.715937000  | 0.669180000  | 1.985575000  |
| C | -3.360740000 | -1.141335000 | 0.232323000  |
| C | 1.698151000  | -0.452468000 | 1.603486000  |
| C | 1.850896000  | -0.747616000 | 0.081691000  |
| C | 3.459306000  | -0.492579000 | -1.914551000 |
| C | 3.312817000  | -0.535663000 | -0.394180000 |
| C | 4.175931000  | -1.672928000 | 0.160345000  |
| O | 2.037197000  | 1.934435000  | 0.350191000  |
| H | 0.648332000  | 3.514680000  | 2.350625000  |
| H | -0.901953000 | 2.963988000  | 1.704287000  |
| H | 0.594774000  | 2.208032000  | -1.134708000 |
| H | 0.211840000  | 3.872586000  | 0.665133000  |
| H | -3.839303000 | 0.821652000  | -0.468099000 |
| H | 0.997312000  | -0.134918000 | -1.811114000 |
| H | 0.946454000  | 1.021567000  | 2.995229000  |
| H | 2.680145000  | -0.179057000 | 1.994397000  |
| H | -0.313716000 | 0.301623000  | 2.009371000  |
| H | 2.987508000  | -1.365373000 | -2.377770000 |
| H | 3.013118000  | 0.404437000  | -2.347358000 |
| H | 1.701040000  | -1.806174000 | -0.070398000 |
| H | 1.400329000  | -1.360085000 | 2.134578000  |
| H | 3.887629000  | -2.624393000 | -0.297568000 |
| H | 4.516112000  | -0.501840000 | -2.189883000 |
| H | 3.682330000  | 0.405691000  | 0.011525000  |
| H | 4.067854000  | -1.776863000 | 1.241854000  |
| H | 5.232359000  | -1.502844000 | -0.056714000 |
| O | -1.467675000 | 1.524736000  | -1.397018000 |
| C | -1.030869000 | -1.811931000 | -0.094084000 |
| C | -2.352688000 | -2.083829000 | 0.289126000  |
| C | -2.435339000 | 2.557735000  | -1.432428000 |
| H | -1.944014000 | 3.410798000  | -1.894271000 |

|   |              |              |              |
|---|--------------|--------------|--------------|
| H | -3.301098000 | 2.270714000  | -2.032919000 |
| H | -2.760959000 | 2.824637000  | -0.424561000 |
| C | -4.756037000 | -1.441608000 | 0.707705000  |
| H | -4.890531000 | -2.509029000 | 0.879984000  |
| H | -4.963481000 | -0.919867000 | 1.644765000  |
| H | -5.498648000 | -1.111449000 | -0.020214000 |
| C | -0.128558000 | -3.032644000 | -0.089121000 |
| H | 0.500232000  | -3.097054000 | 0.800355000  |
| H | -0.754630000 | -3.923814000 | -0.104918000 |
| H | 0.513135000  | -3.070310000 | -0.968627000 |
| H | -2.590504000 | -3.084550000 | 0.632609000  |

**SCF Done: E(RM062X) = -891.164455342**

**# of imaginary frequencies = 1 (-37.2570)**

**(M)-3'c**

|   |              |              |              |
|---|--------------|--------------|--------------|
| C | -1.839002000 | -1.413548000 | -0.518802000 |
| C | -2.696285000 | -0.663775000 | 0.275432000  |
| C | -3.530138000 | -2.991138000 | -1.120158000 |
| C | -2.219788000 | -2.546652000 | -1.214515000 |
| H | -1.490506000 | -3.069034000 | -1.822215000 |
| C | -4.024473000 | -1.118342000 | 0.369422000  |
| C | -4.410435000 | -2.261522000 | -0.323945000 |
| C | -1.249694000 | 2.905749000  | 0.742579000  |
| C | -1.945735000 | 1.760761000  | 0.001761000  |
| C | -2.212431000 | 0.590199000  | 0.979196000  |
| C | -1.016179000 | 0.304612000  | 1.884654000  |
| C | 0.129448000  | 1.227791000  | 2.026152000  |
| C | 0.140962000  | 2.502023000  | 1.217200000  |
| H | -1.852857000 | 3.205690000  | 1.603179000  |
| H | -1.166163000 | 3.778024000  | 0.091060000  |
| H | -1.253114000 | 1.392756000  | -0.764368000 |
| H | -3.003114000 | 0.912996000  | 1.660753000  |
| H | -0.850916000 | -0.743461000 | 2.128383000  |
| H | 0.798811000  | 2.354154000  | 0.354168000  |
| H | 0.592212000  | 3.294691000  | 1.821910000  |
| C | -3.229982000 | 2.213999000  | -0.722414000 |
| H | -3.795601000 | 1.311308000  | -0.977658000 |
| C | 1.468088000  | 0.750398000  | 2.525395000  |
| H | 1.808262000  | 1.419443000  | 3.319287000  |
| H | 1.404771000  | -0.261892000 | 2.926853000  |
| H | 2.217212000  | 0.774815000  | 1.732559000  |
| C | -4.122692000 | 3.107267000  | 0.142754000  |
| H | -5.098101000 | 3.237027000  | -0.330033000 |
| H | -4.286329000 | 2.695002000  | 1.141005000  |
| H | -3.677967000 | 4.097874000  | 0.263518000  |
| C | -2.897825000 | 2.921332000  | -2.036507000 |
| H | -2.300424000 | 3.819534000  | -1.861030000 |
| H | -2.335445000 | 2.265623000  | -2.704321000 |
| H | -3.810981000 | 3.228217000  | -2.550416000 |
| O | -0.523034000 | -0.953559000 | -0.671427000 |
| O | -0.901172000 | 1.165026000  | 3.017988000  |
| H | -5.439792000 | -2.594676000 | -0.244238000 |
| C | -5.050309000 | -0.389772000 | 1.200017000  |
| H | -4.741792000 | -0.315359000 | 2.244515000  |
| H | -5.212169000 | 0.625636000  | 0.832991000  |
| H | -6.003249000 | -0.915092000 | 1.166472000  |
| C | -3.981011000 | -4.236673000 | -1.833308000 |
| H | -3.351941000 | -4.444014000 | -2.698433000 |
| H | -3.926600000 | -5.099881000 | -1.166088000 |
| H | -5.014282000 | -4.142736000 | -2.167333000 |

|   |             |              |              |
|---|-------------|--------------|--------------|
| C | 0.466880000 | -1.673464000 | -0.123744000 |
| O | 0.319718000 | -2.686708000 | 0.499353000  |
| C | 1.792502000 | -1.027029000 | -0.353669000 |
| C | 2.914105000 | -1.627503000 | 0.203464000  |
| C | 1.902500000 | 0.169672000  | -1.049548000 |
| C | 4.136939000 | -1.002503000 | 0.055648000  |
| H | 2.824628000 | -2.555169000 | 0.751472000  |
| C | 3.151036000 | 0.753619000  | -1.159154000 |
| H | 1.037442000 | 0.644070000  | -1.490252000 |
| C | 4.292034000 | 0.195038000  | -0.617309000 |
| H | 5.256437000 | 0.671735000  | -0.711841000 |
| N | 3.267424000 | 2.040454000  | -1.867893000 |
| O | 4.378963000 | 2.494538000  | -2.027562000 |
| O | 2.240398000 | 2.566078000  | -2.240616000 |
| N | 5.331372000 | -1.628575000 | 0.651490000  |
| O | 6.389577000 | -1.053179000 | 0.519318000  |
| O | 5.179164000 | -2.678904000 | 1.235610000  |

**SCF Done: E(RM062X) = -1605.26772357**

**# of imaginary frequencies = 0**

**(P)-3'c**

|   |              |              |              |
|---|--------------|--------------|--------------|
| C | 1.338948000  | 1.801495000  | -0.208333000 |
| C | 2.316505000  | 0.809244000  | -0.238255000 |
| C | 2.916899000  | 3.575612000  | -0.486451000 |
| C | 1.602567000  | 3.149760000  | -0.327668000 |
| H | 0.781276000  | 3.855582000  | -0.288446000 |
| C | 3.642882000  | 1.242158000  | -0.400783000 |
| C | 3.911724000  | 2.606881000  | -0.517677000 |
| C | 2.265068000  | -2.694184000 | 1.385961000  |
| C | 2.224077000  | -1.164729000 | 1.355547000  |
| C | 1.934504000  | -0.650865000 | -0.078407000 |
| C | 2.551051000  | -1.498009000 | -1.181426000 |
| C | 3.269367000  | -2.752421000 | -0.922455000 |
| C | 3.382629000  | -3.238603000 | 0.502698000  |
| H | 1.309813000  | -3.098221000 | 1.043358000  |
| H | 2.413241000  | -3.041386000 | 2.410343000  |
| H | 3.219932000  | -0.805944000 | 1.639467000  |
| H | 0.857696000  | -0.742706000 | -0.238232000 |
| H | 2.791818000  | -0.957804000 | -2.094284000 |
| H | 4.359070000  | -2.933307000 | 0.893615000  |
| H | 3.372883000  | -4.332669000 | 0.498500000  |
| C | 1.234532000  | -0.564129000 | 2.376795000  |
| H | 1.120440000  | 0.496374000  | 2.129769000  |
| C | 4.322312000  | -3.231975000 | -1.880795000 |
| H | 4.322981000  | -4.323252000 | -1.927406000 |
| H | 4.141331000  | -2.836260000 | -2.880232000 |
| H | 5.309656000  | -2.906804000 | -1.546468000 |
| C | -0.150471000 | -1.211821000 | 2.324693000  |
| H | -0.856995000 | -0.645460000 | 2.935835000  |
| H | -0.551171000 | -1.262244000 | 1.309187000  |
| H | -0.118440000 | -2.230521000 | 2.718298000  |
| C | 1.791625000  | -0.635683000 | 3.798768000  |
| H | 1.931063000  | -1.670866000 | 4.119052000  |
| H | 2.753981000  | -0.124986000 | 3.870819000  |
| H | 1.103558000  | -0.164033000 | 4.503173000  |
| O | 0.000792000  | 1.442502000  | 0.021171000  |
| O | 1.928055000  | -2.759082000 | -1.432397000 |
| H | 4.943435000  | 2.920694000  | -0.636380000 |
| C | 4.809630000  | 0.286259000  | -0.484426000 |
| H | 4.701332000  | -0.571375000 | 0.176785000  |

|   |              |              |              |
|---|--------------|--------------|--------------|
| H | 4.924404000  | -0.099445000 | -1.500356000 |
| H | 5.732207000  | 0.802803000  | -0.222925000 |
| C | 3.236063000  | 5.040250000  | -0.612132000 |
| H | 2.711322000  | 5.479096000  | -1.462454000 |
| H | 2.921535000  | 5.582855000  | 0.281159000  |
| H | 4.304886000  | 5.197417000  | -0.749933000 |
| C | -0.720241000 | 1.037829000  | -1.033883000 |
| O | -0.308783000 | 0.971644000  | -2.158125000 |
| C | -2.104865000 | 0.648848000  | -0.630753000 |
| C | -2.956598000 | 0.163422000  | -1.614205000 |
| C | -2.529349000 | 0.743147000  | 0.688766000  |
| C | -4.231852000 | -0.222873000 | -1.249335000 |
| H | -2.623708000 | 0.087744000  | -2.639915000 |
| C | -3.814143000 | 0.336531000  | 0.996277000  |
| H | -1.875950000 | 1.120122000  | 1.462114000  |
| C | -4.694313000 | -0.151815000 | 0.050805000  |
| H | -5.693521000 | -0.464742000 | 0.314790000  |
| N | -4.263647000 | 0.417488000  | 2.396910000  |
| O | -5.405215000 | 0.090848000  | 2.639518000  |
| O | -3.461649000 | 0.802535000  | 3.220244000  |
| N | -5.141187000 | -0.740835000 | -2.286646000 |
| O | -6.250227000 | -1.084494000 | -1.938721000 |
| O | -4.723664000 | -0.790604000 | -3.423069000 |

**SCF Done: E(RM062X) = -1605.26497870**

**# of imaginary frequencies = 0**

### TS1-3'c

|   |              |              |              |
|---|--------------|--------------|--------------|
| C | 5.134823000  | -2.340509000 | 0.899566000  |
| C | 3.160771000  | -1.822096000 | -0.705204000 |
| C | 3.676893000  | -2.069067000 | 0.648436000  |
| C | 3.738236000  | 1.060897000  | -0.874137000 |
| C | 4.191329000  | 2.310990000  | -0.441034000 |
| C | 1.976658000  | -0.853072000 | -0.830857000 |
| C | 2.444859000  | 0.595639000  | -0.518812000 |
| C | 2.868920000  | -1.449374000 | 1.773733000  |
| C | 3.411452000  | 3.188366000  | 0.305089000  |
| C | 1.642885000  | 1.567814000  | 0.106025000  |
| C | 2.095962000  | 2.807438000  | 0.533705000  |
| O | 0.275764000  | 1.373364000  | 0.360922000  |
| C | 1.355365000  | -1.615137000 | 1.547813000  |
| C | 0.854432000  | -1.414627000 | 0.085661000  |
| C | -0.112942000 | -2.612302000 | -1.973710000 |
| C | 0.142089000  | -2.678831000 | -0.466679000 |
| C | -1.200277000 | -2.838966000 | 0.257561000  |
| C | 4.683895000  | 0.324549000  | -1.802444000 |
| C | 3.949808000  | 4.501410000  | 0.805688000  |
| O | 2.960108000  | -3.083259000 | -0.059791000 |
| H | 5.256440000  | -3.044551000 | 1.728253000  |
| H | 5.648896000  | -1.411872000 | 1.166000000  |
| H | 3.831419000  | -1.919581000 | -1.549348000 |
| H | 5.607436000  | -2.761205000 | 0.008443000  |
| H | 5.196821000  | 2.614748000  | -0.722114000 |
| H | 1.616598000  | -0.845929000 | -1.866173000 |
| H | 3.146805000  | -1.918542000 | 2.724402000  |
| H | 1.081637000  | -2.626640000 | 1.864036000  |
| H | 3.147032000  | -0.392091000 | 1.853655000  |
| H | -0.599444000 | -1.665639000 | -2.245147000 |
| H | 0.808750000  | -2.698436000 | -2.556024000 |
| H | 0.047544000  | -0.695022000 | 0.126749000  |
| H | 0.830743000  | -0.927023000 | 2.219169000  |

|   |              |              |              |
|---|--------------|--------------|--------------|
| H | -1.889707000 | -2.037105000 | -0.038285000 |
| H | -0.776099000 | -3.425821000 | -2.282604000 |
| H | 0.759938000  | -3.554531000 | -0.254386000 |
| H | -1.090991000 | -2.799018000 | 1.345794000  |
| H | -1.672136000 | -3.791825000 | 0.001018000  |
| H | 5.303147000  | -0.411165000 | -1.282550000 |
| H | 4.148779000  | -0.183320000 | -2.607845000 |
| H | 5.357789000  | 1.048151000  | -2.264566000 |
| H | 4.345362000  | 4.393371000  | 1.820649000  |
| H | 4.761964000  | 4.861440000  | 0.170432000  |
| H | 3.167450000  | 5.263087000  | 0.836252000  |
| H | 1.390741000  | 3.466994000  | 1.029650000  |
| C | -1.941229000 | 0.967820000  | -0.288488000 |
| C | -2.889588000 | 0.801470000  | -1.295694000 |
| C | -2.279354000 | 0.764613000  | 1.048670000  |
| C | -4.175181000 | 0.429984000  | -0.935624000 |
| H | -2.620898000 | 0.949496000  | -2.334774000 |
| C | -3.581906000 | 0.392473000  | 1.346404000  |
| H | -1.548208000 | 0.879898000  | 1.839185000  |
| C | -4.557766000 | 0.214342000  | 0.379071000  |
| H | -5.566231000 | -0.081477000 | 0.636483000  |
| C | -0.542437000 | 1.296375000  | -0.702936000 |
| O | -0.198100000 | 1.421254000  | -1.850529000 |
| N | -3.945874000 | 0.162903000  | 2.754062000  |
| O | -5.094299000 | -0.158342000 | 2.991851000  |
| O | -3.074444000 | 0.307710000  | 3.589641000  |
| N | -5.181455000 | 0.245029000  | -1.993880000 |
| O | -6.301642000 | -0.082434000 | -1.652194000 |
| O | -4.828192000 | 0.431317000  | -3.142204000 |

**SCF Done: E(RM062X) = -1605.21221228**

**# of imaginary frequencies = 1 (-21.3543)**

### TS2-3'c

|   |              |              |              |
|---|--------------|--------------|--------------|
| C | -0.708732000 | -0.438719000 | 3.244805000  |
| C | -0.981750000 | -1.042643000 | 0.745072000  |
| C | -1.540318000 | -0.925188000 | 2.094359000  |
| C | -1.341683000 | 1.697178000  | -0.168488000 |
| C | -1.565719000 | 3.054696000  | -0.058800000 |
| C | -1.936340000 | -0.769800000 | -0.426600000 |
| C | -2.311094000 | 0.737250000  | -0.488167000 |
| C | -3.038345000 | -0.705866000 | 2.153739000  |
| C | -2.827744000 | 3.563047000  | -0.312345000 |
| C | -3.562072000 | 1.284202000  | -0.868592000 |
| C | -3.784398000 | 2.658996000  | -0.745967000 |
| C | -3.781940000 | -1.601391000 | 1.147573000  |
| C | -3.132291000 | -1.733922000 | -0.262541000 |
| C | -1.921768000 | -3.378201000 | -1.831344000 |
| C | -2.817844000 | -3.214256000 | -0.604357000 |
| C | -4.139000000 | -3.949856000 | -0.846065000 |
| C | -3.134523000 | 5.025495000  | -0.150719000 |
| O | -1.192076000 | -2.202918000 | 1.555060000  |
| H | -1.024503000 | -0.915049000 | 4.175411000  |
| H | -0.825407000 | 0.641140000  | 3.359696000  |
| H | 0.074617000  | -0.867121000 | 0.609553000  |
| H | 0.345494000  | -0.662817000 | 3.077062000  |
| H | -0.736634000 | 3.695874000  | 0.214949000  |
| H | -1.426143000 | -0.994153000 | -1.366605000 |
| H | -3.397000000 | -0.924148000 | 3.163268000  |
| H | -3.845223000 | -2.599475000 | 1.584323000  |
| H | -3.240235000 | 0.353133000  | 1.971681000  |

|   |              |              |              |
|---|--------------|--------------|--------------|
| H | -2.317500000 | -2.815274000 | -2.682801000 |
| H | -0.900083000 | -3.042158000 | -1.646552000 |
| H | -3.867032000 | -1.464520000 | -1.007980000 |
| H | -4.809153000 | -1.240177000 | 1.061514000  |
| H | -4.624829000 | -3.567711000 | -1.749136000 |
| H | -1.874073000 | -4.429461000 | -2.122152000 |
| H | -2.318709000 | -3.672615000 | 0.248778000  |
| H | -4.834438000 | -3.825209000 | -0.013988000 |
| H | -3.969025000 | -5.019231000 | -0.983795000 |
| H | -3.423203000 | 5.243740000  | 0.879931000  |
| H | -2.263543000 | 5.637133000  | -0.385740000 |
| H | -3.957970000 | 5.326711000  | -0.797536000 |
| H | -4.760787000 | 3.039761000  | -1.024193000 |
| C | -4.717600000 | 0.529422000  | -1.498221000 |
| H | -4.385514000 | -0.107413000 | -2.317449000 |
| H | -5.268633000 | -0.083819000 | -0.785507000 |
| H | -5.418935000 | 1.250916000  | -1.913248000 |
| O | -0.011009000 | 1.327599000  | 0.083001000  |
| C | 0.747357000  | 1.008056000  | -0.976473000 |
| O | 0.371230000  | 1.004950000  | -2.113702000 |
| C | 2.128882000  | 0.625873000  | -0.555832000 |
| C | 2.498928000  | 0.599687000  | 0.782918000  |
| C | 3.034480000  | 0.267968000  | -1.545987000 |
| C | 3.783763000  | 0.204337000  | 1.102330000  |
| H | 1.806539000  | 0.879713000  | 1.563621000  |
| C | 4.307586000  | -0.109637000 | -1.168336000 |
| H | 2.743837000  | 0.284280000  | -2.586800000 |
| C | 4.716907000  | -0.154273000 | 0.150564000  |
| H | 5.716419000  | -0.457683000 | 0.423071000  |
| N | 4.175327000  | 0.159539000  | 2.522333000  |
| O | 5.318952000  | -0.144505000 | 2.777520000  |
| O | 3.326532000  | 0.428120000  | 3.344375000  |
| N | 5.276010000  | -0.486923000 | -2.213755000 |
| O | 6.386851000  | -0.810142000 | -1.855700000 |
| O | 4.898753000  | -0.449030000 | -3.363627000 |

**SCF Done: E(RM062X) = -1605.21020143**

**# of imaginary frequencies = 1 (-34.1805)**
